# Supplementary material for: Estuarine microbial networks and relationships vary between environmentally distinct communities
Source: PeerJ. 2022 Sep 20;10:e14005. doi: 10.7717/peerj.14005 (PMC9504456; doi:10.7717/peerj.14005)
Supplement: Supplemental Information 2 — Environmental parameters measured over the year on each sampling day. Samples are distinguished by month and cluster. Dissolved nutrients and particulate organic carbon and nitrogen were not measured on 9/6. [file peerj-10-14005-s002.xlsx]

## Sheet: Table_S2
Sample	Month	Temperature (°C)	Salinity (psu)	Chlorophyll (μg/L)	Nitrate (μM)	Ammonium (μM)	Phosphate (μM)	Silicate (μM)	Solar (MJ/m2)	POC (μg C/L)	PON (μg N/L)	DO (mg/L)	Cluster
031617-A-A1	March	13.56	27.34	4.05246	0.605887	2.95191	0.707931	43.4483	13.49	78.55	8.13193	9.84	Cluster_1
032217-A-A4	March	16.82	26.64	3.16816	0.005	1.38889	0.551371	43.4483	12.56	68.6361	12.829	11.09	Cluster_1
032917-A-A7	March	19.82	27.7	5.14151	0.0300806	0.956606	0.763375	43.9335	14.09	154.272	16.3861	8.98	Cluster_1
041217-A-A10	April	20.36	28.84	3.90952	0.185269	3.18482	0.413212	37.501	17.41	61.2934	13.7242	9.49	Cluster_1
042017-A-B1	April	24.2	27.45	3.15957	0.170242	1.13405	0.550708	55.7155	14.86	50.224	13.4024	8.08	Cluster_1
050317-A-B4	May	25.9	29.6	6.22365	0.628387	0.4801	0.566277	52.2521	22.33	56.7069	12.0877	7.13	Cluster_1
060717-A-B7	June	27.96	30.87	2.68168	0.678468	1.30044	0.717022	91.0448	16.12	52.573	11.9153	6.11	Cluster_2
061517-A-B10	June	28.03	28.89	5.40814	0.320484	0.535379	0.570205	99.0111	19.86	68.8642	14.8022	7.69	Cluster_2
062217-A-C1	June	28.93	31.48	1.93988	0.598387	2.13737	0.761783	113.061	12.68	81.4203	18.2574	6.19	Cluster_2
070617-A-C4	July	30.01	28.12	4.0925	0.583306	0.590934	0.537349	98.4768	18.98	80.0918	14.0985	9.44	Cluster_2
072117-A-C7	July	30.23	30.15	6.38228	1.29935	0.0909342	0.733718	127.047	16.39	79.651	14.6753	6.22	Cluster_2
072717-A-C10	July	29.74	32.14	4.11489	0.771129	0.191819	0.816278	121.86	11.08	70.6051	11.1875	5.43	Cluster_2
080317-A-D1	August	29.13	29.94	4.58796	1.25935	0	0.690555	130.214	15.47	59.2959	13.0191	7.75	Cluster_2
081017-A-D4	August	29.22	29.73	4.75872	1.50718	0	0.6904	139.238	7.62	69.2978	12.6897	6.5	Cluster_2
081717-A-D7	August	31.23	29.28	5.31576	1.77008	0	0.668238	119.098	18.51	41.7081	7.36527	6.82	Cluster_2
082317-A-D10	August	30.66	30.32	5.79723	1.49718	0.352405	0.729218	119.649	17.89	38.9108	10.5254	4.2	Cluster_2
083017-A-E1	August	27.02	26.58	2.47453	1.71	1.20619	0.693121	125.746	10.79	37.6285	11.4923	21.67	Cluster_2
090617-A-E3	September	28.57	27.98	3.81817	NA	NA	NA	NA	NA	NA	NA	6.73	Cluster_2
092017-A-E6	September	27.05	26.73	2.5781	0.748548	2.85213	0.358405	81.6201	11.04	56.3291	7.32556	6.45	Cluster_2
092617-A-E9	September	28.13	28.79	2.74326	0.460645	0.895799	0.537611	86.8379	11.03	57.3979	6.74346	7.7	Cluster_2
100417-A-E12	October	24.82	27.77	2.75726	0.751048	1.63295	0.72794	82.66	11.52	79.4802	7.01051	7.86	Cluster_2
101117-A-F3	October	28.1	29.23	2.65088	0.721048	2.02653	0.724508	74.9049	11.13	69.3944	13.6353	6.85	Cluster_2
101817-A-F5	October	23.9	29.75	2.49133	0.961371	2.18159	0.708597	82.1399	11.28	62.6727	7.79588	9.21	Cluster_2
110817-A-F8	November	21.42	31.19	2.64809	0.550806	2.04312	0.689344	62.2065	5.75	41.7103	6.37152	10.71	Cluster_1
111617-A-F11	November	16.43	30.53	2.231	0.88129	0.97319	0.673259	62.709	6.48	32.2118	7.20244	13.37	Cluster_1
112117-A-G2	November	16.1	30.83	2.76005	0.354839	3.24572	0.648889	59.2011	4.43	53.1719	6.21753	13.48	Cluster_1
120817-A-G4	December	16.95	30.82	3.17434	0.428871	1.90989	0.470096	54.7236	0.86	81.3021	15.2717	12	Cluster_1
121417-A-G7	December	12.17	29.94	1.65995	0.908871	4.81979	0.531687	58.7018	5.08	34.4591	8.15568	15.21	Cluster_1
011818-A-G10	January	8.52	29.03	3.44044	0.838871	4.99355	0.570129	39.1022	6.74	58.2611	7.16194	18.33	Cluster_1
012418-A-H1	January	9.71	29.3	2.07424	0.197258	1.02322	0.410921	26.282	6.58	34.2649	6.71969	17.2	Cluster_1
020118-A-H4	February	10.84	31	3.18746	0.342903	2.35904	0.3706	18.3801	7.52	80.4802	6.7649	14.13	Cluster_1
020818-A-H7	February	12.79	29.02	2.30624	0.421774	3.02957	0.46368	24.878	3.45	37.8623	21.0773	14.86	Cluster_1
022118-A-H10	February	17.32	28.35	1.32124	0.493387	3.85544	0.623742	34.7916	11.52	40.8602	11.3043	11.63	Cluster_1
