# Supplementary material for: Estuarine microbial networks and relationships vary between environmentally distinct communities
Source: PeerJ. 2022 Sep 20;10:e14005. doi: 10.7717/peerj.14005 (PMC9504456; doi:10.7717/peerj.14005)
Supplement: Supplemental Information 3 — Degree and closeness centrality for each 16S and 18S ASV (Domain, Class-Species) present in Cluster 1 or 2 networks. A “Shared” column indicates whether or not an ASV was included in both networks. A separate sheet (Network Comp) describes the number of ASVs (nodes) within each order level microbial group that were present in Cluster 1 and 2 networks, as well as the overlap in these major order level groups (Shared vs. Cluster 1 or Cluster 2 only). [file peerj-10-14005-s003.xlsx]

## Sheet: Table S3
ASV ID	Domain	Class	Order	Family	Genus	Species	Closeness centrality	Degree	Cluster	Shared
ASV10002	Eukaryota	Dinophyceae	Peridiniales	Unassigned Peridiniales (Order)	Unassigned Peridiniales (Order)	Unassigned Peridiniales (Order)	0.310488	11	Cluster 1	No
ASV10027	Eukaryota	Dinophyceae	Unassigned Dinophyceae (Class)	Unassigned Dinophyceae (Class)	Unassigned Dinophyceae (Class)	Unassigned Dinophyceae (Class)	0.281369	8	Cluster 2	No
ASV10030	Eukaryota	Dinophyceae	Unassigned Dinophyceae (Class)	Unassigned Dinophyceae (Class)	Unassigned Dinophyceae (Class)	Unassigned Dinophyceae (Class)	0.304791	7	Cluster 1	Yes
ASV10030	Eukaryota	Dinophyceae	Unassigned Dinophyceae (Class)	Unassigned Dinophyceae (Class)	Unassigned Dinophyceae (Class)	Unassigned Dinophyceae (Class)	0.277413	9	Cluster 2	Yes
ASV10034	Eukaryota	Dinophyceae	Peridiniales	Unassigned Peridiniales (Order)	Unassigned Peridiniales (Order)	Unassigned Peridiniales (Order)	0.268359	6	Cluster 2	No
ASV10047	Eukaryota	Dinophyceae	Peridiniales	Unassigned Peridiniales (Order)	Unassigned Peridiniales (Order)	Unassigned Peridiniales (Order)	0.334452	9	Cluster 1	No
ASV10083	Eukaryota	Dinophyceae	Unassigned Dinophyceae (Class)	Unassigned Dinophyceae (Class)	Unassigned Dinophyceae (Class)	Unassigned Dinophyceae (Class)	0.23756	4	Cluster 2	No
ASV10087	Eukaryota	Dinophyceae	Unassigned Dinophyceae (Class)	Unassigned Dinophyceae (Class)	Unassigned Dinophyceae (Class)	Unassigned Dinophyceae (Class)	0.273063	6	Cluster 2	No
ASV10096	Eukaryota	Dinophyceae	Unassigned Dinophyceae (Class)	Unassigned Dinophyceae (Class)	Unassigned Dinophyceae (Class)	Unassigned Dinophyceae (Class)	0.265471	7	Cluster 2	No
ASV10105	Eukaryota	Dinophyceae	Gymnodiniales	Gymnodiniaceae	Gyrodinium	Unassigned Gyrodinium (Genus)	0.323593	10	Cluster 1	Yes
ASV10105	Eukaryota	Dinophyceae	Gymnodiniales	Gymnodiniaceae	Gyrodinium	Unassigned Gyrodinium (Genus)	0.277934	6	Cluster 2	Yes
ASV10116	Eukaryota	Dinophyceae	Peridiniales	Unassigned Peridiniales (Order)	Unassigned Peridiniales (Order)	Unassigned Peridiniales (Order)	0.328933	10	Cluster 1	No
ASV1024	Eukaryota	Filosa-Thecofilosea	Ebriida	TAGIRI1-lineage	TAGIRI1-lineage_X	TAGIRI1-lineage_X_sp.	0.280488	5	Cluster 1	No
ASV1027	Eukaryota	Filosa-Thecofilosea	Ebriida	TAGIRI1-lineage	TAGIRI1-lineage_X	TAGIRI1-lineage_X_sp.	0.305102	6	Cluster 1	No
ASV1066	Eukaryota	Filosa-Thecofilosea	Ebriida	Ebriidae	Ebria	Ebria_tripartita	0.309845	6	Cluster 1	No
ASV1075	Eukaryota	Filosa-Thecofilosea	Ebriida	Ebriidae	Ebria	Ebria_tripartita	0.318085	8	Cluster 1	No
ASV1480	Eukaryota	Filosa-Imbricatea	Filosa-Imbricatea_X	Novel-clade-2	Novel-clade-2_X	Novel-clade-2_X_sp.	0.268847	6	Cluster 2	No
ASV1564	Eukaryota	Filosa-Imbricatea	Filosa-Imbricatea_X	Novel-clade-2	Novel-clade-2_X	Novel-clade-2_X_sp.	0.296333	5	Cluster 1	No
ASV2011	Eukaryota	Bacillariophyta	Bacillariophyta_X	Raphid-pennate	Unassigned Raphid-pennate (Family)	Unassigned Raphid-pennate (Family)	0.271311	8	Cluster 2	No
ASV2081	Eukaryota	Bacillariophyta	Bacillariophyta_X	Raphid-pennate	Unassigned Raphid-pennate (Family)	Unassigned Raphid-pennate (Family)	0.263345	5	Cluster 2	No
ASV2105	Eukaryota	Bacillariophyta	Bacillariophyta_X	Raphid-pennate	Seminavis	Seminavis_sp.	0.306039	6	Cluster 1	Yes
ASV2105	Eukaryota	Bacillariophyta	Bacillariophyta_X	Raphid-pennate	Seminavis	Seminavis_sp.	0.274838	9	Cluster 2	Yes
ASV2140	Eukaryota	Bacillariophyta	Bacillariophyta_X	Raphid-pennate	Unassigned Raphid-pennate (Family)	Unassigned Raphid-pennate (Family)	0.271311	8	Cluster 2	No
ASV2295	Eukaryota	Bacillariophyta	Bacillariophyta_X	Raphid-pennate	Surirella	Surirella_sp.	0.243822	3	Cluster 2	No
ASV2468	Eukaryota	Bacillariophyta	Bacillariophyta_X	Polar-centric-Mediophyceae	Chaetoceros	Chaetoceros_danicus	0.327492	7	Cluster 1	No
ASV2491	Eukaryota	Bacillariophyta	Bacillariophyta_X	Polar-centric-Mediophyceae	Chaetoceros	Chaetoceros_sp_P._quinquecorne_endosymbiont	0.309204	7	Cluster 1	Yes
ASV2491	Eukaryota	Bacillariophyta	Bacillariophyta_X	Polar-centric-Mediophyceae	Chaetoceros	Chaetoceros_sp_P._quinquecorne_endosymbiont	0.271062	10	Cluster 2	Yes
ASV2497	Eukaryota	Bacillariophyta	Bacillariophyta_X	Polar-centric-Mediophyceae	Chaetoceros	Chaetoceros_socialis_debilis	0.309845	9	Cluster 1	No
ASV2519	Eukaryota	Bacillariophyta	Bacillariophyta_X	Polar-centric-Mediophyceae	Chaetoceros	Unassigned Chaetoceros (Genus)	0.297809	4	Cluster 1	Yes
ASV2519	Eukaryota	Bacillariophyta	Bacillariophyta_X	Polar-centric-Mediophyceae	Chaetoceros	Unassigned Chaetoceros (Genus)	0.253208	6	Cluster 2	Yes
ASV2520	Eukaryota	Bacillariophyta	Bacillariophyta_X	Polar-centric-Mediophyceae	Chaetoceros	Chaetoceros_pumilum	0.339387	11	Cluster 1	No
ASV2531	Eukaryota	Bacillariophyta	Bacillariophyta_X	Unassigned Bacillariophyta_X (Order)	Unassigned Bacillariophyta_X (Order)	Unassigned Bacillariophyta_X (Order)	0.286267	10	Cluster 2	No
ASV2534	Eukaryota	Bacillariophyta	Bacillariophyta_X	Polar-centric-Mediophyceae	Unassigned Polar-centric-Mediophyceae (Family)	Unassigned Polar-centric-Mediophyceae (Family)	0.287379	8	Cluster 2	No
ASV2545	Eukaryota	Bacillariophyta	Bacillariophyta_X	Polar-centric-Mediophyceae	Chaetoceros	Unassigned Chaetoceros (Genus)	0.334078	12	Cluster 1	Yes
ASV2545	Eukaryota	Bacillariophyta	Bacillariophyta_X	Polar-centric-Mediophyceae	Chaetoceros	Unassigned Chaetoceros (Genus)	0.281369	9	Cluster 2	Yes
ASV2562	Eukaryota	Bacillariophyta	Bacillariophyta_X	Polar-centric-Mediophyceae	Chaetoceros	Chaetoceros_elegans	0.324647	8	Cluster 1	Yes
ASV2562	Eukaryota	Bacillariophyta	Bacillariophyta_X	Polar-centric-Mediophyceae	Chaetoceros	Chaetoceros_elegans	0.273567	8	Cluster 2	Yes
ASV2579	Eukaryota	Bacillariophyta	Bacillariophyta_X	Polar-centric-Mediophyceae	Chaetoceros	Unassigned Chaetoceros (Genus)	0.314737	8	Cluster 1	No
ASV2582	Eukaryota	Bacillariophyta	Bacillariophyta_X	Polar-centric-Mediophyceae	Chaetoceros	Chaetoceros_decipiens	0.328933	10	Cluster 1	No
ASV2583	Eukaryota	Bacillariophyta	Bacillariophyta_X	Polar-centric-Mediophyceae	Chaetoceros	Chaetoceros_decipiens	0.253425	5	Cluster 2	No
ASV2597	Eukaryota	Bacillariophyta	Bacillariophyta_X	Polar-centric-Mediophyceae	Chaetoceros	Chaetoceros_muellerii	0.280038	9	Cluster 2	No
ASV2600	Eukaryota	Bacillariophyta	Bacillariophyta_X	Polar-centric-Mediophyceae	Chaetoceros	Chaetoceros_muellerii	0.288499	12	Cluster 2	No
ASV2637	Eukaryota	Bacillariophyta	Bacillariophyta_X	Polar-centric-Mediophyceae	Unassigned Polar-centric-Mediophyceae (Family)	Unassigned Polar-centric-Mediophyceae (Family)	0.339773	12	Cluster 1	Yes
ASV2637	Eukaryota	Bacillariophyta	Bacillariophyta_X	Polar-centric-Mediophyceae	Unassigned Polar-centric-Mediophyceae (Family)	Unassigned Polar-centric-Mediophyceae (Family)	0.251273	4	Cluster 2	Yes
ASV2639	Eukaryota	Bacillariophyta	Bacillariophyta_X	Polar-centric-Mediophyceae	Ditylum	Unassigned Ditylum (Genus)	0.275349	6	Cluster 2	Yes
ASV2659	Eukaryota	Bacillariophyta	Bacillariophyta_X	Polar-centric-Mediophyceae	Odontella	Odontella_mobiliensis	0.247285	4	Cluster 2	Yes
ASV2700	Eukaryota	Bacillariophyta	Bacillariophyta_X	Radial-centric-basal-Coscinodiscophyceae	Actinocyclus	Actinocyclus_curvatulus	0.332962	11	Cluster 1	Yes
ASV2700	Eukaryota	Bacillariophyta	Bacillariophyta_X	Radial-centric-basal-Coscinodiscophyceae	Actinocyclus	Actinocyclus_curvatulus	0.26358	7	Cluster 2	Yes
ASV2718	Eukaryota	Bacillariophyta	Bacillariophyta_X	Radial-centric-basal-Coscinodiscophyceae	Coscinodiscus	Coscinodiscus_sp.	0.322546	9	Cluster 1	No
ASV2723	Eukaryota	Bacillariophyta	Bacillariophyta_X	Radial-centric-basal-Coscinodiscophyceae	Coscinodiscus	Coscinodiscus_jonesianus	0.264758	6	Cluster 2	No
ASV2734	Eukaryota	Bacillariophyta	Bacillariophyta_X	Radial-centric-basal-Coscinodiscophyceae	Guinardia	Guinardia_delicatula	0.294872	5	Cluster 1	Yes
ASV2734	Eukaryota	Bacillariophyta	Bacillariophyta_X	Radial-centric-basal-Coscinodiscophyceae	Guinardia	Guinardia_delicatula	0.265471	6	Cluster 2	Yes
ASV2741	Eukaryota	Bacillariophyta	Bacillariophyta_X	Radial-centric-basal-Coscinodiscophyceae	Rhizosolenia	Rhizosolenia_delicatula	0.323593	8	Cluster 1	No
ASV2762	Eukaryota	Bacillariophyta	Bacillariophyta_X	Polar-centric-Mediophyceae	Thalassiosira	Thalassiosira_guillardii	0.279701	5	Cluster 1	No
ASV2772	Eukaryota	Bacillariophyta	Bacillariophyta_X	Polar-centric-Mediophyceae	Cyclotella	Unassigned Cyclotella (Genus)	0.326063	9	Cluster 1	Yes
ASV2772	Eukaryota	Bacillariophyta	Bacillariophyta_X	Polar-centric-Mediophyceae	Cyclotella	Unassigned Cyclotella (Genus)	0.289062	10	Cluster 2	Yes
ASV2778	Eukaryota	Bacillariophyta	Bacillariophyta_X	Polar-centric-Mediophyceae	Cyclotella	Cyclotella_sp.	0.317073	8	Cluster 1	Yes
ASV2778	Eukaryota	Bacillariophyta	Bacillariophyta_X	Polar-centric-Mediophyceae	Cyclotella	Cyclotella_sp.	0.263345	5	Cluster 2	Yes
ASV2823	Eukaryota	Bacillariophyta	Bacillariophyta_X	Polar-centric-Mediophyceae	Thalassiosira	Unassigned Thalassiosira (Genus)	0.324647	10	Cluster 1	Yes
ASV2823	Eukaryota	Bacillariophyta	Bacillariophyta_X	Polar-centric-Mediophyceae	Thalassiosira	Unassigned Thalassiosira (Genus)	0.265948	8	Cluster 2	Yes
ASV2826	Eukaryota	Bacillariophyta	Bacillariophyta_X	Polar-centric-Mediophyceae	Unassigned Polar-centric-Mediophyceae (Family)	Unassigned Polar-centric-Mediophyceae (Family)	0.313089	8	Cluster 1	Yes
ASV2826	Eukaryota	Bacillariophyta	Bacillariophyta_X	Polar-centric-Mediophyceae	Unassigned Polar-centric-Mediophyceae (Family)	Unassigned Polar-centric-Mediophyceae (Family)	0.260563	5	Cluster 2	Yes
ASV2844	Eukaryota	Bacillariophyta	Bacillariophyta_X	Polar-centric-Mediophyceae	Thalassiosira	Unassigned Thalassiosira (Genus)	0.325708	11	Cluster 1	No
ASV2846	Eukaryota	Bacillariophyta	Bacillariophyta_X	Polar-centric-Mediophyceae	Thalassiosira	Unassigned Thalassiosira (Genus)	0.268847	7	Cluster 2	No
ASV2849	Eukaryota	Bacillariophyta	Bacillariophyta_X	Polar-centric-Mediophyceae	Thalassiosira	Unassigned Thalassiosira (Genus)	0.296333	5	Cluster 1	No
ASV2851	Eukaryota	Bacillariophyta	Bacillariophyta_X	Polar-centric-Mediophyceae	Thalassiosira	Thalassiosira_anguste-lineata	0.300508	14	Cluster 2	No
ASV2857	Eukaryota	Bacillariophyta	Bacillariophyta_X	Polar-centric-Mediophyceae	Thalassiosira	Thalassiosira_anguste-lineata	0.299299	8	Cluster 1	No
ASV2858	Eukaryota	Bacillariophyta	Bacillariophyta_X	Polar-centric-Mediophyceae	Unassigned Polar-centric-Mediophyceae (Family)	Unassigned Polar-centric-Mediophyceae (Family)	0.305414	10	Cluster 1	Yes
ASV2858	Eukaryota	Bacillariophyta	Bacillariophyta_X	Polar-centric-Mediophyceae	Unassigned Polar-centric-Mediophyceae (Family)	Unassigned Polar-centric-Mediophyceae (Family)	0.252991	5	Cluster 2	Yes
ASV2860	Eukaryota	Bacillariophyta	Bacillariophyta_X	Polar-centric-Mediophyceae	Thalassiosira	Thalassiosira_mala	0.338235	13	Cluster 1	No
ASV2864	Eukaryota	Bacillariophyta	Bacillariophyta_X	Polar-centric-Mediophyceae	Thalassiosira	Unassigned Thalassiosira (Genus)	0.337472	10	Cluster 1	No
ASV2869	Eukaryota	Bacillariophyta	Bacillariophyta_X	Polar-centric-Mediophyceae	Unassigned Polar-centric-Mediophyceae (Family)	Unassigned Polar-centric-Mediophyceae (Family)	0.303245	6	Cluster 1	No
ASV2880	Eukaryota	Bacillariophyta	Bacillariophyta_X	Polar-centric-Mediophyceae	Thalassiosira	Unassigned Thalassiosira (Genus)	0.303862	6	Cluster 1	Yes
ASV2880	Eukaryota	Bacillariophyta	Bacillariophyta_X	Polar-centric-Mediophyceae	Thalassiosira	Unassigned Thalassiosira (Genus)	0.253425	5	Cluster 2	Yes
ASV2881	Eukaryota	Bacillariophyta	Bacillariophyta_X	Polar-centric-Mediophyceae	Thalassiosira	Unassigned Thalassiosira (Genus)	0.316402	9	Cluster 1	Yes
ASV2881	Eukaryota	Bacillariophyta	Bacillariophyta_X	Polar-centric-Mediophyceae	Thalassiosira	Unassigned Thalassiosira (Genus)	0.253642	5	Cluster 2	Yes
ASV2888	Eukaryota	Bacillariophyta	Bacillariophyta_X	Polar-centric-Mediophyceae	Thalassiosira	Unassigned Thalassiosira (Genus)	0.330387	13	Cluster 1	Yes
ASV2888	Eukaryota	Bacillariophyta	Bacillariophyta_X	Polar-centric-Mediophyceae	Thalassiosira	Unassigned Thalassiosira (Genus)	0.249789	4	Cluster 2	Yes
ASV2896	Eukaryota	Bacillariophyta	Bacillariophyta_X	Polar-centric-Mediophyceae	Thalassiosira	Thalassiosira_hendeyi	0.269336	8	Cluster 2	No
ASV2897	Eukaryota	Bacillariophyta	Bacillariophyta_X	Polar-centric-Mediophyceae	Thalassiosira	Thalassiosira_hendeyi	0.267148	5	Cluster 2	No
ASV2904	Eukaryota	Bacillariophyta	Bacillariophyta_X	Polar-centric-Mediophyceae	Skeletonema	Skeletonema_sp.	0.323243	12	Cluster 1	Yes
ASV2904	Eukaryota	Bacillariophyta	Bacillariophyta_X	Polar-centric-Mediophyceae	Skeletonema	Skeletonema_sp.	0.270814	9	Cluster 2	Yes
ASV2915	Eukaryota	Bacillariophyta	Bacillariophyta_X	Polar-centric-Mediophyceae	Skeletonema	Unassigned Skeletonema (Genus)	0.271809	8	Cluster 2	No
ASV2920	Eukaryota	Bacillariophyta	Bacillariophyta_X	Polar-centric-Mediophyceae	Skeletonema	Skeletonema_sp.	0.317073	8	Cluster 1	No
ASV2928	Eukaryota	Bacillariophyta	Bacillariophyta_X	Polar-centric-Mediophyceae	Skeletonema	Unassigned Skeletonema (Genus)	0.277674	7	Cluster 2	No
ASV2931	Eukaryota	Bacillariophyta	Bacillariophyta_X	Polar-centric-Mediophyceae	Skeletonema	Unassigned Skeletonema (Genus)	0.274074	7	Cluster 2	No
ASV2932	Eukaryota	Bacillariophyta	Bacillariophyta_X	Polar-centric-Mediophyceae	Skeletonema	Unassigned Skeletonema (Genus)	0.302938	9	Cluster 1	Yes
ASV2932	Eukaryota	Bacillariophyta	Bacillariophyta_X	Polar-centric-Mediophyceae	Skeletonema	Unassigned Skeletonema (Genus)	0.268603	7	Cluster 2	Yes
ASV2935	Eukaryota	Bacillariophyta	Bacillariophyta_X	Polar-centric-Mediophyceae	Polar-centric-Mediophyceae_X	Polar-centric-Mediophyceae_X_sp.	0.261947	7	Cluster 2	No
ASV3507	Eukaryota	MAST-1	MAST-1C	MAST-1C_X	MAST-1C_XX	MAST-1C_XX_sp.	0.305414	7	Cluster 1	No
ASV3537	Eukaryota	MAST-6	MAST-6_X	MAST-6_XX	MAST-6_XXX	MAST-6_XXX_sp.	0.311458	7	Cluster 1	No
ASV3540	Eukaryota	MAST-6	MAST-6_X	MAST-6_XX	MAST-6_XXX	MAST-6_XXX_sp.	0.325354	9	Cluster 1	No
ASV3544	Eukaryota	MAST-6	MAST-6_X	MAST-6_XX	MAST-6_XXX	MAST-6_XXX_sp.	0.339002	11	Cluster 1	Yes
ASV3544	Eukaryota	MAST-6	MAST-6_X	MAST-6_XX	MAST-6_XXX	MAST-6_XXX_sp.	0.269827	9	Cluster 2	Yes
ASV3546	Eukaryota	MAST-6	MAST-6_X	MAST-6_XX	MAST-6_XXX	MAST-6_XXX_sp.	0.30793	8	Cluster 1	Yes
ASV3546	Eukaryota	MAST-6	MAST-6_X	MAST-6_XX	MAST-6_XXX	MAST-6_XXX_sp.	0.275093	7	Cluster 2	Yes
ASV3670	Eukaryota	Bicoecea	Bicoecales	Bicoecaceae	Bicosoeca	Unassigned Bicosoeca (Genus)	0.292201	11	Cluster 2	No
ASV3761	Eukaryota	Bacillariophyta	Bacillariophyta_X	Polar-centric-Mediophyceae	Chaetoceros	Unassigned Chaetoceros (Genus)	0.323243	8	Cluster 1	No
ASV4087	Eukaryota	Picozoa_X	Picozoa_XX	Picozoa_XXX	Picozoa_XXXX	Picozoa_XXXX_sp.	0.342497	12	Cluster 1	Yes
ASV4087	Eukaryota	Picozoa_X	Picozoa_XX	Picozoa_XXX	Picozoa_XXXX	Picozoa_XXXX_sp.	0.28599	9	Cluster 2	Yes
ASV4093	Eukaryota	Picozoa_X	Picozoa_XX	Picozoa_XXX	Picozoa_XXXX	Picozoa_XXXX_sp.	0.268603	9	Cluster 2	No
ASV4339	Eukaryota	MAST-12	MAST-12A	MAST-12A_X	MAST-12A_XX	MAST-12A_XX_sp.	0.289168	6	Cluster 1	No
ASV4527	Eukaryota	Bacillariophyta	Bacillariophyta_X	Araphid-pennate	Talaroneis	Talaroneis_posidoniae	0.276636	10	Cluster 2	No
ASV4667	Eukaryota	Acantharea	Acantharea_X	Acantharea_XX	Acantharea_XXX	Acantharea_XXX_sp.	0.23053	4	Cluster 2	No
ASV4675	Eukaryota	Acantharea	Arthracanthida-Symphyacanthida	Arthracanthida-Symphyacanthida_X	Unassigned Arthracanthida-Symphyacanthida_X (Family)	Unassigned Arthracanthida-Symphyacanthida_X (Family)	0.309524	8	Cluster 1	No
ASV4816	Eukaryota	Prymnesiophyceae	Prymnesiales	Chrysochromulinaceae	Chrysochromulina	Chrysochromulina_sp.	0.326776	7	Cluster 1	No
ASV4819	Eukaryota	Prymnesiophyceae	Prymnesiales	Chrysochromulinaceae	Chrysochromulina	Chrysochromulina_sp.	0.323243	9	Cluster 1	No
ASV515	Eukaryota	Filosa-Imbricatea	Filosa-Imbricatea_X	Filosa-Imbricatea_XX	Filosa-Imbricatea_XXX	Filosa-Imbricatea_XXX_sp.	0.347271	12	Cluster 1	No
ASV6246	Eukaryota	Telonemia_X	Telonemia_XX	Telonemia-Group-1	Telonemia-Group-1_X	Telonemia-Group-1_X_sp.	0.313417	6	Cluster 1	No
ASV6274	Eukaryota	Telonemia_X	Telonemia_XX	Telonemia-Group-1	Telonemia-Group-1_X	Telonemia-Group-1_X_sp.	0.327133	9	Cluster 1	No
ASV63	Eukaryota	Bacillariophyta	Bacillariophyta_X	Radial-centric-basal-Coscinodiscophyceae	Corethron	Corethron_hystrix	0.324647	9	Cluster 1	Yes
ASV63	Eukaryota	Bacillariophyta	Bacillariophyta_X	Radial-centric-basal-Coscinodiscophyceae	Corethron	Corethron_hystrix	0.2871	9	Cluster 2	Yes
ASV6398	Eukaryota	Katablepharidaceae	Katablepharidales	Katablepharidales_X	Leucocryptos	Leucocryptos_marina	0.305102	6	Cluster 1	Yes
ASV6398	Eukaryota	Katablepharidaceae	Katablepharidales	Katablepharidales_X	Leucocryptos	Leucocryptos_marina	0.282713	8	Cluster 2	Yes
ASV6405	Eukaryota	Katablepharidaceae	Katablepharidales	Katablepharidales_X	Katablepharis	Katablepharis_japonica	0.276894	8	Cluster 2	No
ASV6406	Eukaryota	Katablepharidaceae	Katablepharidales	Katablepharidales_X	Katablepharidales_XX	Katablepharidales_XX_sp.	0.325354	8	Cluster 1	No
ASV6438	Eukaryota	Cryptophyceae	Cryptomonadales	Cryptomonadales_X	Unassigned Cryptomonadales_X (Family)	Unassigned Cryptomonadales_X (Family)	0.308884	9	Cluster 1	Yes
ASV6438	Eukaryota	Cryptophyceae	Cryptomonadales	Cryptomonadales_X	Unassigned Cryptomonadales_X (Family)	Unassigned Cryptomonadales_X (Family)	0.255393	5	Cluster 2	Yes
ASV6452	Eukaryota	Cryptophyceae	Cryptomonadales	Cryptomonadales_X	Cryptomonadales_XX	Cryptomonadales_XX_sp.	0.32116	7	Cluster 1	Yes
ASV6452	Eukaryota	Cryptophyceae	Cryptomonadales	Cryptomonadales_X	Cryptomonadales_XX	Cryptomonadales_XX_sp.	0.255172	7	Cluster 2	Yes
ASV6453	Eukaryota	Cryptophyceae	Cryptomonadales	Cryptomonadales_X	Plagioselmis	Plagioselmis_prolonga	0.316402	6	Cluster 1	Yes
ASV6453	Eukaryota	Cryptophyceae	Cryptomonadales	Cryptomonadales_X	Plagioselmis	Plagioselmis_prolonga	0.249158	4	Cluster 2	Yes
ASV6486	Eukaryota	Cryptophyceae	Cryptomonadales	Cryptomonadales_X	Falcomonas	Falcomonas_daucoides	0.349299	12	Cluster 1	Yes
ASV6486	Eukaryota	Cryptophyceae	Cryptomonadales	Cryptomonadales_X	Falcomonas	Falcomonas_daucoides	0.265948	6	Cluster 2	Yes
ASV6488	Eukaryota	Cryptophyceae	Cryptomonadales	Cryptomonadales_X	Hemiselmis	Unassigned Hemiselmis (Genus)	0.255834	3	Cluster 2	No
ASV6491	Eukaryota	Cryptophyceae	Cryptomonadales	Cryptomonadales_X	Hemiselmis	Hemiselmis_cryptochromatica	0.332222	10	Cluster 1	Yes
ASV6491	Eukaryota	Cryptophyceae	Cryptomonadales	Cryptomonadales_X	Hemiselmis	Hemiselmis_cryptochromatica	0.280303	10	Cluster 2	Yes
ASV6512	Eukaryota	Cryptophyceae	Cryptomonadales	Cryptomonadales_X	Teleaulax	Unassigned Teleaulax (Genus)	0.329658	9	Cluster 1	Yes
ASV6512	Eukaryota	Cryptophyceae	Cryptomonadales	Cryptomonadales_X	Teleaulax	Unassigned Teleaulax (Genus)	0.235481	3	Cluster 2	Yes
ASV6517	Eukaryota	Cryptophyceae	Cryptomonadales	Cryptomonadales_X	Teleaulax	Teleaulax_sp.	0.322198	9	Cluster 1	Yes
ASV6517	Eukaryota	Cryptophyceae	Cryptomonadales	Cryptomonadales_X	Teleaulax	Teleaulax_sp.	0.2263	3	Cluster 2	Yes
ASV6518	Eukaryota	Cryptophyceae	Cryptomonadales	Cryptomonadales_X	Teleaulax	Unassigned Teleaulax (Genus)	0.334452	11	Cluster 1	Yes
ASV6518	Eukaryota	Cryptophyceae	Cryptomonadales	Cryptomonadales_X	Teleaulax	Unassigned Teleaulax (Genus)	0.225954	3	Cluster 2	Yes
ASV6521	Eukaryota	Cryptophyceae	Cryptomonadales	Cryptomonadales_X	Teleaulax	Unassigned Teleaulax (Genus)	0.315734	10	Cluster 1	Yes
ASV6521	Eukaryota	Cryptophyceae	Cryptomonadales	Cryptomonadales_X	Teleaulax	Unassigned Teleaulax (Genus)	0.231793	4	Cluster 2	Yes
ASV6524	Eukaryota	Cryptophyceae	Cryptomonadales	Cryptomonadales_X	Teleaulax	Unassigned Teleaulax (Genus)	0.263204	3	Cluster 1	Yes
ASV6524	Eukaryota	Cryptophyceae	Cryptomonadales	Cryptomonadales_X	Teleaulax	Unassigned Teleaulax (Genus)	0.211278	2	Cluster 2	Yes
ASV6766	Eukaryota	Unassigned Fungi (Division)	Unassigned Fungi (Division)	Unassigned Fungi (Division)	Unassigned Fungi (Division)	Unassigned Fungi (Division)	0.243221	5	Cluster 2	No
ASV6872	Eukaryota	Nephroselmidophyceae	Nephroselmidales	Nephroselmidales_X	Nephroselmis	Nephroselmis_pyriformis	0.318424	9	Cluster 1	No
ASV6910	Eukaryota	Pyramimonadales	Pyramimonadales_X	Pyramimonadales_XX	Unassigned Pyramimonadales_XX (Family)	Unassigned Pyramimonadales_XX (Family)	0.304791	7	Cluster 1	No
ASV6926	Eukaryota	Pyramimonadales	Pyramimonadales_X	Pyramimonadales_XX	Unassigned Pyramimonadales_XX (Family)	Unassigned Pyramimonadales_XX (Family)	0.348485	12	Cluster 1	Yes
ASV6926	Eukaryota	Pyramimonadales	Pyramimonadales_X	Pyramimonadales_XX	Unassigned Pyramimonadales_XX (Family)	Unassigned Pyramimonadales_XX (Family)	0.224242	4	Cluster 2	Yes
ASV6991	Eukaryota	Mamiellophyceae	Mamiellales	Mamiellaceae	Micromonas	Micromonas_clade_B4	0.306352	7	Cluster 1	No
ASV6993	Eukaryota	Mamiellophyceae	Mamiellales	Mamiellaceae	Micromonas	Micromonas_bravo_B1	0.331118	10	Cluster 1	No
ASV6994	Eukaryota	Mamiellophyceae	Mamiellales	Mamiellaceae	Micromonas	Micromonas_bravo_B1	0.287777	4	Cluster 1	No
ASV6997	Eukaryota	Mamiellophyceae	Mamiellales	Bathycoccaceae	Bathycoccus	Bathycoccus_prasinos	0.330752	7	Cluster 1	Yes
ASV6997	Eukaryota	Mamiellophyceae	Mamiellales	Bathycoccaceae	Bathycoccus	Bathycoccus_prasinos	0.265948	6	Cluster 2	Yes
ASV7004	Eukaryota	Mamiellophyceae	Mamiellales	Bathycoccaceae	Ostreococcus	Ostreococcus_mediterraneus	0.303553	7	Cluster 1	No
ASV7005	Eukaryota	Mamiellophyceae	Mamiellales	Bathycoccaceae	Ostreococcus	Ostreococcus_mediterraneus	0.337853	12	Cluster 1	No
ASV7007	Eukaryota	Mamiellophyceae	Mamiellales	Bathycoccaceae	Ostreococcus	Ostreococcus_tauri	0.297487	12	Cluster 2	No
ASV7008	Eukaryota	Mamiellophyceae	Mamiellales	Bathycoccaceae	Ostreococcus	Ostreococcus_lucimarinus	0.305102	7	Cluster 1	No
ASV7010	Eukaryota	Mamiellophyceae	Mamiellales	Bathycoccaceae	Ostreococcus	Unassigned Ostreococcus (Genus)	0.307613	8	Cluster 1	Yes
ASV7010	Eukaryota	Mamiellophyceae	Mamiellales	Bathycoccaceae	Ostreococcus	Unassigned Ostreococcus (Genus)	0.248114	4	Cluster 2	Yes
ASV7011	Eukaryota	Mamiellophyceae	Mamiellales	Bathycoccaceae	Ostreococcus	Ostreococcus_clade_B	0.316737	7	Cluster 1	Yes
ASV7011	Eukaryota	Mamiellophyceae	Mamiellales	Bathycoccaceae	Ostreococcus	Ostreococcus_clade_B	0.276636	6	Cluster 2	Yes
ASV7028	Eukaryota	Mamiellophyceae	Mamiellales	Bathycoccaceae	Ostreococcus	Unassigned Ostreococcus (Genus)	0.30202	7	Cluster 1	No
ASV7084	Eukaryota	Pedinophyceae	Marsupiomonadales	Marsupiomonadaceae	Marsupiomonas	Marsupiomonas_pelliculata	0.270567	6	Cluster 2	No
ASV7089	Eukaryota	Pedinophyceae	Marsupiomonadales	Marsupiomonadaceae	Marsupiomonas	Unassigned Marsupiomonas (Genus)	0.296922	8	Cluster 1	No
ASV7130	Eukaryota	Trebouxiophyceae	Chlorellales	Chlorellales_X	Picochlorum	Picochlorum_sp.	0.249789	4	Cluster 2	No
ASV7179	Eukaryota	Unassigned Fungi (Division)	Unassigned Fungi (Division)	Unassigned Fungi (Division)	Unassigned Fungi (Division)	Unassigned Fungi (Division)	0.312109	7	Cluster 1	Yes
ASV7179	Eukaryota	Unassigned Fungi (Division)	Unassigned Fungi (Division)	Unassigned Fungi (Division)	Unassigned Fungi (Division)	Unassigned Fungi (Division)	0.267631	7	Cluster 2	Yes
ASV7181	Eukaryota	Unassigned Fungi (Division)	Unassigned Fungi (Division)	Unassigned Fungi (Division)	Unassigned Fungi (Division)	Unassigned Fungi (Division)	0.346065	11	Cluster 1	Yes
ASV7181	Eukaryota	Unassigned Fungi (Division)	Unassigned Fungi (Division)	Unassigned Fungi (Division)	Unassigned Fungi (Division)	Unassigned Fungi (Division)	0.277154	9	Cluster 2	Yes
ASV7194	Eukaryota	Fungi_X	Fungi_XX	Fungi_XXX	Fungi_XXXX	Fungi_XXXX_sp.	0.27406	4	Cluster 1	No
ASV7234	Eukaryota	Bacillariophyta	Bacillariophyta_X	Polar-centric-Mediophyceae	Chaetoceros	Chaetoceros_debilis_3	0.315734	9	Cluster 1	No
ASV7569	Eukaryota	CONThreeP	CONThreeP_X	CONThreeP_XX	Askenasia	Askenasia_sp.	0.263345	4	Cluster 2	No
ASV7596	Eukaryota	CONThreeP	CONThreeP_X	CONThreeP_XX	Askenasia	Askenasia_sp.	0.315068	8	Cluster 1	Yes
ASV7596	Eukaryota	CONThreeP	CONThreeP_X	CONThreeP_XX	Askenasia	Askenasia_sp.	0.25829	6	Cluster 2	Yes
ASV7635	Eukaryota	Phyllopharyngea	Cyrtophoria_1	PHYLL_4	PHYLL_4_X	PHYLL_4_X_sp.	0.258515	5	Cluster 2	No
ASV7676	Eukaryota	Spirotrichea	Strombidiida	Strombidiidae_R	Strombidium_R	Strombidium_R_sp.	0.338618	11	Cluster 1	No
ASV7678	Eukaryota	Spirotrichea	Strombidiida	Strombidiidae_R	Strombidium_R	Strombidium_R_sp.	0.306982	7	Cluster 1	No
ASV7722	Eukaryota	Spirotrichea	Strombidiida	Strombidiidae_K	Strombidium_K	Strombidium_capitatum	0.298106	7	Cluster 1	No
ASV7726	Eukaryota	Spirotrichea	Strombidiida	Strombidiidae_K	Strombidium_K	Strombidium_K_sp.	0.329658	10	Cluster 1	No
ASV7740	Eukaryota	Spirotrichea	Strombidiida	Strombidiidae	Spirostrombidium	Spirostrombidium_agathae	0.22928	2	Cluster 2	No
ASV7744	Eukaryota	Spirotrichea	Strombidiida	Strombidiidae	Spirostrombidium	Spirostrombidium_agathae	0.304481	5	Cluster 1	Yes
ASV7744	Eukaryota	Spirotrichea	Strombidiida	Strombidiidae	Spirostrombidium	Spirostrombidium_agathae	0.256499	5	Cluster 2	Yes
ASV7755	Eukaryota	Spirotrichea	Strombidiida	Strombidiidae	Spirostrombidium	Spirostrombidium_agathae	0.236611	3	Cluster 2	No
ASV7760	Eukaryota	Spirotrichea	Strombidiida	Strombidiidae_H	Strombidiidae_H_X	Strombidiidae_H_X_sp.	0.231975	5	Cluster 2	No
ASV7770	Eukaryota	Spirotrichea	Strombidiida	Strombidiidae_M	Strombidium_M	Strombidium_M_sp.	0.306667	8	Cluster 1	Yes
ASV7770	Eukaryota	Spirotrichea	Strombidiida	Strombidiidae_M	Strombidium_M	Strombidium_M_sp.	0.27156	7	Cluster 2	Yes
ASV7787	Eukaryota	Spirotrichea	Strombidiida	Strombidiidae	Strombidium	Strombidium_sp.	0.295163	6	Cluster 1	No
ASV7793	Eukaryota	Spirotrichea	Strombidiida_B	Strombidiida_B_X	Strombidiida_B_XX	Strombidiida_B_XX_sp.	0.339002	12	Cluster 1	No
ASV7805	Eukaryota	Spirotrichea	Strombidiida	Strombidiidae	Unassigned Strombidiidae (Family)	Unassigned Strombidiidae (Family)	0.300201	6	Cluster 1	No
ASV7811	Eukaryota	Spirotrichea	Strombidiida	Strombidiidae	Unassigned Strombidiidae (Family)	Unassigned Strombidiidae (Family)	0.281544	4	Cluster 1	No
ASV7814	Eukaryota	Spirotrichea	Strombidiida	Strombidiidae	Spirostrombidium	Spirostrombidium_agathae	0.305726	5	Cluster 1	Yes
ASV7814	Eukaryota	Spirotrichea	Strombidiida	Strombidiidae	Spirostrombidium	Spirostrombidium_agathae	0.246667	6	Cluster 2	Yes
ASV7846	Eukaryota	Spirotrichea	Tintinnida	Eutintinnidae	Eutintinnus	Eutintinnus_pectinis	0.234921	2	Cluster 2	No
ASV7873	Eukaryota	Spirotrichea	Tintinnida	TIN_08	Tintinnopsis_08	Tintinnopsis_subacuta	0.188415	1	Cluster 2	No
ASV7877	Eukaryota	Spirotrichea	Tintinnida	TIN_11	TIN_11_X	TIN_11_X_sp.	0.327851	12	Cluster 1	No
ASV7880	Eukaryota	Spirotrichea	Tintinnida	TIN_11	TIN_11_X	TIN_11_X_sp.	0.272811	6	Cluster 2	No
ASV7892	Eukaryota	Spirotrichea	Tintinnida	TIN_04	Tintinnopsis_04	Tintinnopsis_parvula	0.324295	7	Cluster 1	No
ASV7901	Eukaryota	Spirotrichea	Tintinnida	TIN_05	Tintinnopsis_05	Unassigned Tintinnopsis_05 (Genus)	0.298106	7	Cluster 1	No
ASV7912	Eukaryota	Spirotrichea	Tintinnida	TIN_07	Tintinnopsis_07	Unassigned Tintinnopsis_07 (Genus)	0.329658	12	Cluster 1	No
ASV8035	Eukaryota	Spirotrichea	Tintinnida	Tintinnidiidae	Tintinnidium	Tintinnidium_fluviatile	0.268359	7	Cluster 2	No
ASV8048	Eukaryota	Spirotrichea	Tintinnida	Tintinnidiidae	Tintinnidium	Unassigned Tintinnidium (Genus)	0.320815	8	Cluster 1	No
ASV8050	Eukaryota	Spirotrichea	Tintinnida	Tintinnidiidae	Tintinnidium	Unassigned Tintinnidium (Genus)	0.28878	10	Cluster 2	No
ASV8051	Eukaryota	Spirotrichea	Tintinnida	Tintinnidiidae	Tintinnidium	Tintinnidium_sp.	0.2368	3	Cluster 2	No
ASV8061	Eukaryota	Spirotrichea	Choreotrichida	Strombidinopsidae	Parastrombidinopsis	Unassigned Parastrombidinopsis (Genus)	0.317073	7	Cluster 1	No
ASV8065	Eukaryota	Spirotrichea	Choreotrichida	Strombidinopsidae	Strombidinopsis	Strombidinopsis_sp.	0.355529	12	Cluster 1	No
ASV8081	Eukaryota	Spirotrichea	Tintinnida	Unassigned Tintinnida (Order)	Unassigned Tintinnida (Order)	Unassigned Tintinnida (Order)	0.264522	6	Cluster 2	No
ASV8116	Eukaryota	Spirotrichea	Choreotrichida	Strobilidiidae_I	Pelagostrobilidium	Pelagostrobilidium_neptuni	0.343284	12	Cluster 1	No
ASV8120	Eukaryota	Spirotrichea	Choreotrichida	Strobilidiidae_I	Pelagostrobilidium	Pelagostrobilidium_sp.	0.260793	4	Cluster 2	No
ASV8122	Eukaryota	Spirotrichea	Choreotrichida	Strobilidiidae_I	Pelagostrobilidium	Pelagostrobilidium_sp.	0.266427	5	Cluster 2	No
ASV8126	Eukaryota	Spirotrichea	Choreotrichida	Strobilidiidae_I	Pelagostrobilidium	Pelagostrobilidium_sp.	0.318424	11	Cluster 1	No
ASV8128	Eukaryota	Spirotrichea	Choreotrichida	Strobilidiidae_I	Pelagostrobilidium	Pelagostrobilidium_sp.	0.278658	5	Cluster 1	Yes
ASV8128	Eukaryota	Spirotrichea	Choreotrichida	Strobilidiidae_I	Pelagostrobilidium	Pelagostrobilidium_sp.	0.284342	9	Cluster 2	Yes
ASV8142	Eukaryota	Spirotrichea	Tintinnida	TIN_11	TIN_11_X	TIN_11_X_sp.	0.203157	2	Cluster 2	No
ASV8144	Eukaryota	Spirotrichea	Choreotrichida	Strobilidiidae	Strobilidiidae_X	Strobilidiidae_X_sp.	0.328933	12	Cluster 1	No
ASV8149	Eukaryota	Spirotrichea	Unassigned Spirotrichea (Class)	Unassigned Spirotrichea (Class)	Unassigned Spirotrichea (Class)	Unassigned Spirotrichea (Class)	0.176086	2	Cluster 2	No
ASV8150	Eukaryota	Spirotrichea	Unassigned Spirotrichea (Class)	Unassigned Spirotrichea (Class)	Unassigned Spirotrichea (Class)	Unassigned Spirotrichea (Class)	0.316737	8	Cluster 1	No
ASV8158	Eukaryota	Spirotrichea	Choreotrichida	Choreotrichida_X	Choreotrichida_XX	Choreotrichida_XX_sp.	0.253642	5	Cluster 2	No
ASV8175	Eukaryota	Spirotrichea	Choreotrichida	Strobilidiidae_I	Pelagostrobilidium	Pelagostrobilidium_paraepacrum	0.303245	5	Cluster 1	No
ASV8206	Eukaryota	Filosa-Imbricatea	Filosa-Imbricatea_X	Novel-clade-2	Novel-clade-2_X	Novel-clade-2_X_sp.	0.321505	8	Cluster 1	No
ASV8262	Eukaryota	Colpodellidea	Colpodellida	Chrompodellids_CHR1_XX	Chrompodellids_CHR1_XXX	Chrompodellids_CHR1_XXX_sp.	0.334452	14	Cluster 1	No
ASV8364	Eukaryota	Syndiniales	Dino-Group-I	Dino-Group-I-Clade-1	Dino-Group-I-Clade-1_X	Dino-Group-I-Clade-1_X_sp.	0.300503	7	Cluster 1	No
ASV8375	Eukaryota	Syndiniales	Dino-Group-I	Dino-Group-I-Clade-1	Dino-Group-I-Clade-1_X	Dino-Group-I-Clade-1_X_sp.	0.262877	6	Cluster 2	No
ASV840	Eukaryota	Filosa-Thecofilosea	Cryomonadida	Protaspa-lineage	Protaspa-lineage_X	Protaspa-lineage_X_sp.	0.333333	9	Cluster 1	No
ASV8407	Eukaryota	Syndiniales	Dino-Group-II	Dino-Group-II-Clade-14	Dino-Group-II-Clade-14_X	Dino-Group-II-Clade-14_X_sp.	0.248739	5	Cluster 2	No
ASV8413	Eukaryota	Syndiniales	Dino-Group-II	Unassigned Dino-Group-II (Order)	Unassigned Dino-Group-II (Order)	Unassigned Dino-Group-II (Order)	0.272309	7	Cluster 2	No
ASV8415	Eukaryota	Syndiniales	Dino-Group-II	Dino-Group-II-Clade-13	Dino-Group-II-Clade-13_X	Dino-Group-II-Clade-13_X_sp.	0.252991	5	Cluster 2	No
ASV842	Eukaryota	Filosa-Thecofilosea	Cryomonadida	Protaspa-lineage	Protaspa-lineage_X	Protaspa-lineage_X_sp.	0.318763	8	Cluster 1	Yes
ASV842	Eukaryota	Filosa-Thecofilosea	Cryomonadida	Protaspa-lineage	Protaspa-lineage_X	Protaspa-lineage_X_sp.	0.274328	6	Cluster 2	Yes
ASV8435	Eukaryota	Syndiniales	Dino-Group-II	Dino-Group-II-Clade-44	Dino-Group-II-Clade-44_X	Dino-Group-II-Clade-44_X_sp.	0.277674	9	Cluster 2	No
ASV8461	Eukaryota	Syndiniales	Dino-Group-II	Dino-Group-II-Clade-12	Dino-Group-II-Clade-12_X	Dino-Group-II-Clade-12_X_sp.	0.274328	9	Cluster 2	No
ASV8496	Eukaryota	Syndiniales	Dino-Group-II	Dino-Group-II-Clade-1	Dino-Group-II-Clade-1_X	Dino-Group-II-Clade-1_X_sp.	0.252344	5	Cluster 2	No
ASV8511	Eukaryota	Syndiniales	Dino-Group-II	Dino-Group-II-Clade-1	Dino-Group-II-Clade-1_X	Dino-Group-II-Clade-1_X_sp.	0.250211	6	Cluster 2	No
ASV8512	Eukaryota	Syndiniales	Dino-Group-II	Dino-Group-II-Clade-1	Dino-Group-II-Clade-1_X	Dino-Group-II-Clade-1_X_sp.	0.307297	6	Cluster 1	No
ASV8544	Eukaryota	Syndiniales	Dino-Group-II	Dino-Group-II-Clade-1	Dino-Group-II-Clade-1_X	Dino-Group-II-Clade-1_X_sp.	0.308884	7	Cluster 1	No
ASV8591	Eukaryota	Syndiniales	Dino-Group-II	Dino-Group-II-Clade-1	Dino-Group-II-Clade-1_X	Dino-Group-II-Clade-1_X_sp.	0.267873	7	Cluster 2	No
ASV864	Eukaryota	Filosa-Thecofilosea	Cryomonadida	Protaspa-lineage	Protaspa-lineage_X	Protaspa-lineage_X_sp.	0.291707	6	Cluster 1	No
ASV8688	Eukaryota	Syndiniales	Dino-Group-II	Dino-Group-II-Clade-3	Dino-Group-II-Clade-3_X	Dino-Group-II-Clade-3_X_sp.	0.296296	9	Cluster 2	No
ASV8786	Eukaryota	Syndiniales	Dino-Group-II	Dino-Group-II-Clade-1	Dino-Group-II-Clade-1_X	Dino-Group-II-Clade-1_X_sp.	0.266667	6	Cluster 2	No
ASV8799	Eukaryota	Syndiniales	Dino-Group-II	Unassigned Dino-Group-II (Order)	Unassigned Dino-Group-II (Order)	Unassigned Dino-Group-II (Order)	0.310811	6	Cluster 1	No
ASV8874	Eukaryota	Syndiniales	Dino-Group-II	Dino-Group-II-Clade-30	Dino-Group-II-Clade-30_X	Dino-Group-II-Clade-30_X_sp.	0.253208	5	Cluster 2	No
ASV8955	Eukaryota	Syndiniales	Dino-Group-II	Dino-Group-II-Clade-6	Dino-Group-II-Clade-6_X	Dino-Group-II-Clade-6_X_sp.	0.253208	4	Cluster 2	No
ASV8962	Eukaryota	Syndiniales	Dino-Group-II	Dino-Group-II-Clade-6	Dino-Group-II-Clade-6_X	Dino-Group-II-Clade-6_X_sp.	0.334078	10	Cluster 1	No
ASV8965	Eukaryota	Syndiniales	Dino-Group-II	Dino-Group-II-Clade-6	Dino-Group-II-Clade-6_X	Dino-Group-II-Clade-6_X_sp.	0.319104	9	Cluster 1	Yes
ASV8965	Eukaryota	Syndiniales	Dino-Group-II	Dino-Group-II-Clade-6	Dino-Group-II-Clade-6_X	Dino-Group-II-Clade-6_X_sp.	0.284889	10	Cluster 2	Yes
ASV9009	Eukaryota	Dinophyceae	Gymnodiniales	Chytriodiniaceae	Chytriodinium	Chytriodinium_sp.	0.27156	7	Cluster 2	No
ASV9028	Eukaryota	Syndiniales	Dino-Group-I	Dino-Group-I-Clade-4	Dino-Group-I-Clade-4_X	Dino-Group-I-Clade-4_X_sp.	0.274583	8	Cluster 2	No
ASV9069	Eukaryota	Syndiniales	Dino-Group-I	Dino-Group-I-Clade-4	Dino-Group-I-Clade-4_X	Dino-Group-I-Clade-4_X_sp.	0.273315	7	Cluster 2	No
ASV9074	Eukaryota	Syndiniales	Dino-Group-I	Dino-Group-I-Clade-4	Dino-Group-I-Clade-4_X	Dino-Group-I-Clade-4_X_sp.	0.267389	7	Cluster 2	No
ASV9082	Eukaryota	Syndiniales	Dino-Group-I	Dino-Group-I-Clade-4	Dino-Group-I-Clade-4_X	Dino-Group-I-Clade-4_X_sp.	0.252344	7	Cluster 2	No
ASV9094	Eukaryota	Syndiniales	Dino-Group-I	Dino-Group-I-Clade-4	Dino-Group-I-Clade-4_X	Dino-Group-I-Clade-4_X_sp.	0.340547	11	Cluster 1	No
ASV9095	Eukaryota	Syndiniales	Dino-Group-I	Dino-Group-I-Clade-4	Dino-Group-I-Clade-4_X	Dino-Group-I-Clade-4_X_sp.	0.313746	8	Cluster 1	No
ASV9116	Eukaryota	Syndiniales	Dino-Group-I	Dino-Group-I-Clade-5	Dino-Group-I-Clade-5_X	Dino-Group-I-Clade-5_X_sp.	0.301733	11	Cluster 2	No
ASV9128	Eukaryota	Dinophyceae	Dinophyceae_X	Oodiniaceae	Oodinium	Oodinium_pouchetii	0.270814	9	Cluster 2	No
ASV9129	Eukaryota	Dinophyceae	Dinophyceae_X	Oodiniaceae	Oodinium	Oodinium_pouchetii	0.234548	4	Cluster 2	No
ASV9132	Eukaryota	Dinophyceae	Dinophyceae_X	Oodiniaceae	Oodinium	Oodinium_pouchetii	0.258515	8	Cluster 2	No
ASV9160	Eukaryota	Dinophyceae	Gonyaulacales	Goniodomataceae	Alexandrium	Unassigned Alexandrium (Genus)	0.322894	8	Cluster 1	Yes
ASV9160	Eukaryota	Dinophyceae	Gonyaulacales	Goniodomataceae	Alexandrium	Unassigned Alexandrium (Genus)	0.254514	5	Cluster 2	Yes
ASV9171	Eukaryota	Dinophyceae	Gonyaulacales	Goniodomataceae	Alexandrium	Unassigned Alexandrium (Genus)	0.267148	7	Cluster 2	No
ASV9199	Eukaryota	Dinophyceae	Gonyaulacales	Goniodomataceae	Alexandrium	Alexandrium_leei	0.269091	7	Cluster 2	No
ASV9245	Eukaryota	Eukaryota_XXX	Eukaryota_XXXX	Eukaryota_XXXXX	Eukaryota_XXXXXX	Eukaryota_XXXXXX_sp.	0.225954	2	Cluster 2	No
ASV9247	Eukaryota	Eukaryota_XXX	Eukaryota_XXXX	Eukaryota_XXXXX	Eukaryota_XXXXXX	Eukaryota_XXXXXX_sp.	0.243221	6	Cluster 2	No
ASV9325	Eukaryota	Dinophyceae	Gonyaulacales	Gonyaulacaceae	Gonyaulax	Unassigned Gonyaulax (Genus)	0.277674	9	Cluster 2	No
ASV9339	Eukaryota	Dinophyceae	Gonyaulacales	Gonyaulacaceae	Gonyaulax	Unassigned Gonyaulax (Genus)	0.277934	8	Cluster 2	No
ASV9400	Eukaryota	Syndiniales	Dino-Group-III	Dino-Group-III_X	Dino-Group-III_XX	Dino-Group-III_XX_sp.	0.342497	13	Cluster 1	Yes
ASV9400	Eukaryota	Syndiniales	Dino-Group-III	Dino-Group-III_X	Dino-Group-III_XX	Dino-Group-III_XX_sp.	0.281369	8	Cluster 2	Yes
ASV9423	Eukaryota	Dinophyceae	Unassigned Dinophyceae (Class)	Unassigned Dinophyceae (Class)	Unassigned Dinophyceae (Class)	Unassigned Dinophyceae (Class)	0.284342	10	Cluster 2	No
ASV9426	Eukaryota	Dinophyceae	Gymnodiniales	Gymnodiniaceae	Gyrodinium	Gyrodinium_dominans	0.264758	5	Cluster 2	No
ASV9427	Eukaryota	Dinophyceae	Gymnodiniales	Gymnodiniaceae	Gyrodinium	Gyrodinium_dominans	0.340935	11	Cluster 1	Yes
ASV9427	Eukaryota	Dinophyceae	Gymnodiniales	Gymnodiniaceae	Gyrodinium	Gyrodinium_dominans	0.266427	6	Cluster 2	Yes
ASV9486	Eukaryota	Dinophyceae	Gymnodiniales	Gymnodiniaceae	Gymnodinium	Gymnodinium_sp.	0.309524	7	Cluster 1	No
ASV9487	Eukaryota	Dinophyceae	Unassigned Dinophyceae (Class)	Unassigned Dinophyceae (Class)	Unassigned Dinophyceae (Class)	Unassigned Dinophyceae (Class)	0.287938	10	Cluster 2	No
ASV9507	Eukaryota	Dinophyceae	Unassigned Dinophyceae (Class)	Unassigned Dinophyceae (Class)	Unassigned Dinophyceae (Class)	Unassigned Dinophyceae (Class)	0.331486	9	Cluster 1	No
ASV9508	Eukaryota	Dinophyceae	Unassigned Dinophyceae (Class)	Unassigned Dinophyceae (Class)	Unassigned Dinophyceae (Class)	Unassigned Dinophyceae (Class)	0.314737	7	Cluster 1	No
ASV9512	Eukaryota	Dinophyceae	Unassigned Dinophyceae (Class)	Unassigned Dinophyceae (Class)	Unassigned Dinophyceae (Class)	Unassigned Dinophyceae (Class)	0.29001	4	Cluster 1	No
ASV9522	Eukaryota	Dinophyceae	Unassigned Dinophyceae (Class)	Unassigned Dinophyceae (Class)	Unassigned Dinophyceae (Class)	Unassigned Dinophyceae (Class)	0.295409	10	Cluster 2	No
ASV9529	Eukaryota	Dinophyceae	Unassigned Dinophyceae (Class)	Unassigned Dinophyceae (Class)	Unassigned Dinophyceae (Class)	Unassigned Dinophyceae (Class)	0.27256	5	Cluster 2	No
ASV9531	Eukaryota	Dinophyceae	Gymnodiniales	Gymnodiniaceae	Unassigned Gymnodiniaceae (Family)	Unassigned Gymnodiniaceae (Family)	0.330022	11	Cluster 1	Yes
ASV9531	Eukaryota	Dinophyceae	Gymnodiniales	Gymnodiniaceae	Unassigned Gymnodiniaceae (Family)	Unassigned Gymnodiniaceae (Family)	0.28878	9	Cluster 2	Yes
ASV9536	Eukaryota	Dinophyceae	Gymnodiniales	Gymnodiniaceae	Gymnodinium	Gymnodinium_sp.	0.319786	8	Cluster 1	No
ASV9565	Eukaryota	Dinophyceae	Unassigned Dinophyceae (Class)	Unassigned Dinophyceae (Class)	Unassigned Dinophyceae (Class)	Unassigned Dinophyceae (Class)	0.324647	9	Cluster 1	No
ASV9570	Eukaryota	Dinophyceae	Unassigned Dinophyceae (Class)	Unassigned Dinophyceae (Class)	Unassigned Dinophyceae (Class)	Unassigned Dinophyceae (Class)	0.269091	6	Cluster 2	No
ASV9572	Eukaryota	Dinophyceae	Unassigned Dinophyceae (Class)	Unassigned Dinophyceae (Class)	Unassigned Dinophyceae (Class)	Unassigned Dinophyceae (Class)	0.28599	8	Cluster 2	No
ASV9575	Eukaryota	Dinophyceae	Unassigned Dinophyceae (Class)	Unassigned Dinophyceae (Class)	Unassigned Dinophyceae (Class)	Unassigned Dinophyceae (Class)	0.24483	5	Cluster 2	No
ASV9584	Eukaryota	Dinophyceae	Gymnodiniales	Gymnodiniaceae	Polykrikos	Polykrikos_kofoidii	0.329295	10	Cluster 1	No
ASV9608	Eukaryota	Dinophyceae	Gymnodiniales	Gymnodiniaceae	Gymnodinium	Gymnodinium_sp.	0.297512	7	Cluster 1	No
ASV9623	Eukaryota	Dinophyceae	Gymnodiniales	Gymnodiniaceae	Gymnodinium	Gymnodinium_sp.	0.306039	7	Cluster 1	Yes
ASV9623	Eukaryota	Dinophyceae	Gymnodiniales	Gymnodiniaceae	Gymnodinium	Gymnodinium_sp.	0.262179	7	Cluster 2	Yes
ASV9628	Eukaryota	Dinophyceae	Gymnodiniales	Unassigned Gymnodiniales (Order)	Unassigned Gymnodiniales (Order)	Unassigned Gymnodiniales (Order)	0.297809	7	Cluster 1	No
ASV9631	Eukaryota	Dinophyceae	Gymnodiniales	Unassigned Gymnodiniales (Order)	Unassigned Gymnodiniales (Order)	Unassigned Gymnodiniales (Order)	0.329658	8	Cluster 1	No
ASV9637	Eukaryota	Dinophyceae	Unassigned Dinophyceae (Class)	Unassigned Dinophyceae (Class)	Unassigned Dinophyceae (Class)	Unassigned Dinophyceae (Class)	0.297217	8	Cluster 1	No
ASV9641	Eukaryota	Dinophyceae	Unassigned Dinophyceae (Class)	Unassigned Dinophyceae (Class)	Unassigned Dinophyceae (Class)	Unassigned Dinophyceae (Class)	0.215116	3	Cluster 2	No
ASV9659	Eukaryota	Dinophyceae	Peridiniales	Heterocapsaceae	Heterocapsa	Unassigned Heterocapsa (Genus)	0.321505	8	Cluster 1	Yes
ASV9659	Eukaryota	Dinophyceae	Peridiniales	Heterocapsaceae	Heterocapsa	Unassigned Heterocapsa (Genus)	0.260334	5	Cluster 2	Yes
ASV9660	Eukaryota	Dinophyceae	Peridiniales	Heterocapsaceae	Heterocapsa	Unassigned Heterocapsa (Genus)	0.337091	9	Cluster 1	Yes
ASV9660	Eukaryota	Dinophyceae	Peridiniales	Heterocapsaceae	Heterocapsa	Unassigned Heterocapsa (Genus)	0.239676	4	Cluster 2	Yes
ASV9668	Eukaryota	Dinophyceae	Peridiniales	Heterocapsaceae	Heterocapsa	Heterocapsa_rotundata	0.314737	8	Cluster 1	No
ASV9669	Eukaryota	Dinophyceae	Peridiniales	Heterocapsaceae	Heterocapsa	Heterocapsa_rotundata	0.331853	9	Cluster 1	No
ASV9773	Eukaryota	Dinophyceae	Peridiniales	Unassigned Peridiniales (Order)	Unassigned Peridiniales (Order)	Unassigned Peridiniales (Order)	0.267631	6	Cluster 2	No
ASV9774	Eukaryota	Dinophyceae	Unassigned Dinophyceae (Class)	Unassigned Dinophyceae (Class)	Unassigned Dinophyceae (Class)	Unassigned Dinophyceae (Class)	0.292779	9	Cluster 2	No
ASV9777	Eukaryota	Dinophyceae	Unassigned Dinophyceae (Class)	Unassigned Dinophyceae (Class)	Unassigned Dinophyceae (Class)	Unassigned Dinophyceae (Class)	0.278982	9	Cluster 2	No
ASV9880	Eukaryota	Dinophyceae	Suessiales	Suessiaceae	Unassigned Suessiaceae (Family)	Unassigned Suessiaceae (Family)	0.305102	7	Cluster 1	No
ASV9884	Eukaryota	Dinophyceae	Suessiales	Suessiaceae	Biecheleria	Biecheleria_cincta	0.313089	7	Cluster 1	No
ASV9925	Eukaryota	Dinophyceae	Peridiniales	Thoracosphaeraceae	Unassigned Thoracosphaeraceae (Family)	Unassigned Thoracosphaeraceae (Family)	0.314406	8	Cluster 1	No
ASV9927	Eukaryota	Dinophyceae	Peridiniales	Thoracosphaeraceae	Pentapharsodinium	Pentapharsodinium_sp.	0.248739	5	Cluster 2	No
ASV9933	Eukaryota	Dinophyceae	Peridiniales	Thoracosphaeraceae	Unassigned Thoracosphaeraceae (Family)	Unassigned Thoracosphaeraceae (Family)	0.281102	9	Cluster 2	No
ASV9992	Eukaryota	Dinophyceae	Peridiniales	Amphidiniopsidaceae	Islandinium	Islandinium_tricingulatum	0.28861	6	Cluster 1	No
bASV10282	Bacteria	Verrucomicrobiae	Opitutales	Puniceicoccaceae	MB11C04 marine group	uncultured marine bacterium	0.336333	8	Cluster 1	Yes
bASV10282	Bacteria	Verrucomicrobiae	Opitutales	Puniceicoccaceae	MB11C04 marine group	uncultured marine bacterium	0.23756	4	Cluster 2	Yes
bASV10806	Bacteria	Alphaproteobacteria	Puniceispirillales	SAR116 clade	Unassigned SAR116 clade (Family)	Unassigned SAR116 clade (Family)	0.308884	6	Cluster 1	Yes
bASV10806	Bacteria	Alphaproteobacteria	Puniceispirillales	SAR116 clade	Unassigned SAR116 clade (Family)	Unassigned SAR116 clade (Family)	0.232522	2	Cluster 2	Yes
bASV10814	Bacteria	Alphaproteobacteria	Puniceispirillales	SAR116 clade	Unassigned SAR116 clade (Family)	Unassigned SAR116 clade (Family)	0.301715	6	Cluster 1	No
bASV10826	Bacteria	Alphaproteobacteria	Puniceispirillales	SAR116 clade	Unassigned SAR116 clade (Family)	Unassigned SAR116 clade (Family)	0.279701	4	Cluster 1	No
bASV10989	Bacteria	Alphaproteobacteria	Puniceispirillales	SAR116 clade	Candidatus Puniceispirillum	uncultured bacterium	0.316737	8	Cluster 1	No
bASV10990	Bacteria	Alphaproteobacteria	Puniceispirillales	SAR116 clade	Candidatus Puniceispirillum	uncultured bacterium	0.317073	7	Cluster 1	No
bASV11002	Bacteria	Alphaproteobacteria	Puniceispirillales	SAR116 clade	Candidatus Puniceispirillum	uncultured bacterium	0.301715	6	Cluster 1	No
bASV11003	Bacteria	Alphaproteobacteria	Puniceispirillales	SAR116 clade	Candidatus Puniceispirillum	uncultured bacterium	0.328933	8	Cluster 1	No
bASV11025	Bacteria	Alphaproteobacteria	Puniceispirillales	SAR116 clade	Candidatus Puniceispirillum	uncultured bacterium	0.302632	5	Cluster 1	No
bASV11443	Bacteria	Alphaproteobacteria	Rhodospirillales	AEGEAN-169 marine group	Unassigned AEGEAN-169 marine group (Family)	Unassigned AEGEAN-169 marine group (Family)	0.285851	5	Cluster 1	No
bASV11454	Bacteria	Alphaproteobacteria	Rhodospirillales	AEGEAN-169 marine group	Unassigned AEGEAN-169 marine group (Family)	Unassigned AEGEAN-169 marine group (Family)	0.179503	1	Cluster 2	No
bASV11458	Bacteria	Alphaproteobacteria	Rhodospirillales	AEGEAN-169 marine group	Unassigned AEGEAN-169 marine group (Family)	Unassigned AEGEAN-169 marine group (Family)	0.210227	3	Cluster 2	No
bASV11461	Bacteria	Alphaproteobacteria	Rhodospirillales	AEGEAN-169 marine group	Unassigned AEGEAN-169 marine group (Family)	Unassigned AEGEAN-169 marine group (Family)	0.250847	3	Cluster 2	No
bASV11464	Bacteria	Alphaproteobacteria	Rhodospirillales	AEGEAN-169 marine group	Unassigned AEGEAN-169 marine group (Family)	Unassigned AEGEAN-169 marine group (Family)	0.290856	4	Cluster 1	No
bASV11467	Bacteria	Alphaproteobacteria	Rhodospirillales	AEGEAN-169 marine group	Unassigned AEGEAN-169 marine group (Family)	Unassigned AEGEAN-169 marine group (Family)	0.23756	3	Cluster 2	No
bASV11620	Bacteria	Alphaproteobacteria	Rhodobacterales	Rhodobacteraceae	Planktomarina	Unassigned Planktomarina (Genus)	0.338618	9	Cluster 1	No
bASV11621	Bacteria	Alphaproteobacteria	Rhodobacterales	Rhodobacteraceae	Planktomarina	Unassigned Planktomarina (Genus)	0.332222	10	Cluster 1	No
bASV11626	Bacteria	Alphaproteobacteria	Rhodobacterales	Rhodobacteraceae	Lentibacter	uncultured bacterium	0.297217	6	Cluster 1	No
bASV11627	Bacteria	Alphaproteobacteria	Rhodobacterales	Rhodobacteraceae	Lentibacter	uncultured bacterium	0.316068	6	Cluster 1	No
bASV11646	Bacteria	Alphaproteobacteria	Rhodobacterales	Rhodobacteraceae	Unassigned Rhodobacteraceae (Family)	Unassigned Rhodobacteraceae (Family)	0.172796	1	Cluster 2	No
bASV11664	Bacteria	Alphaproteobacteria	Rhodobacterales	Rhodobacteraceae	Litorimicrobium	uncultured alpha proteobacterium	0.281015	3	Cluster 1	No
bASV11669	Bacteria	Alphaproteobacteria	Rhodobacterales	Rhodobacteraceae	Litorimicrobium	uncultured alpha proteobacterium	0.327492	9	Cluster 1	No
bASV11681	Bacteria	Alphaproteobacteria	Rhodobacterales	Rhodobacteraceae	Unassigned Rhodobacteraceae (Family)	Unassigned Rhodobacteraceae (Family)	0.296333	6	Cluster 1	No
bASV11691	Bacteria	Alphaproteobacteria	Rhodobacterales	Rhodobacteraceae	Unassigned Rhodobacteraceae (Family)	Unassigned Rhodobacteraceae (Family)	0.284221	4	Cluster 1	No
bASV11694	Bacteria	Alphaproteobacteria	Rhodobacterales	Rhodobacteraceae	Unassigned Rhodobacteraceae (Family)	Unassigned Rhodobacteraceae (Family)	0.294872	4	Cluster 1	No
bASV11705	Bacteria	Alphaproteobacteria	Rhodobacterales	Rhodobacteraceae	HIMB11	Unassigned HIMB11 (Genus)	0.206416	3	Cluster 2	No
bASV11706	Bacteria	Alphaproteobacteria	Rhodobacterales	Rhodobacteraceae	HIMB11	Unassigned HIMB11 (Genus)	0.306982	8	Cluster 1	Yes
bASV11706	Bacteria	Alphaproteobacteria	Rhodobacterales	Rhodobacteraceae	HIMB11	Unassigned HIMB11 (Genus)	0.213564	3	Cluster 2	Yes
bASV11708	Bacteria	Alphaproteobacteria	Rhodobacterales	Rhodobacteraceae	HIMB11	Unassigned HIMB11 (Genus)	0.320472	7	Cluster 1	Yes
bASV11708	Bacteria	Alphaproteobacteria	Rhodobacterales	Rhodobacteraceae	HIMB11	Unassigned HIMB11 (Genus)	0.189137	3	Cluster 2	Yes
bASV11709	Bacteria	Alphaproteobacteria	Rhodobacterales	Rhodobacteraceae	HIMB11	Unassigned HIMB11 (Genus)	0.221889	6	Cluster 2	No
bASV11855	Bacteria	Alphaproteobacteria	Rhodobacterales	Rhodobacteraceae	Ascidiaceihabitans	Unassigned Ascidiaceihabitans (Genus)	0.309845	7	Cluster 1	No
bASV11859	Bacteria	Alphaproteobacteria	Rhodobacterales	Rhodobacteraceae	Ascidiaceihabitans	Unassigned Ascidiaceihabitans (Genus)	0.290291	6	Cluster 1	No
bASV11860	Bacteria	Alphaproteobacteria	Rhodobacterales	Rhodobacteraceae	Ascidiaceihabitans	Unassigned Ascidiaceihabitans (Genus)	0.2875	4	Cluster 1	No
bASV11872	Bacteria	Alphaproteobacteria	Rhodobacterales	Rhodobacteraceae	Unassigned Rhodobacteraceae (Family)	Unassigned Rhodobacteraceae (Family)	0.303862	6	Cluster 1	Yes
bASV11872	Bacteria	Alphaproteobacteria	Rhodobacterales	Rhodobacteraceae	Unassigned Rhodobacteraceae (Family)	Unassigned Rhodobacteraceae (Family)	0.139953	2	Cluster 2	Yes
bASV11873	Bacteria	Alphaproteobacteria	Rhodobacterales	Rhodobacteraceae	Unassigned Rhodobacteraceae (Family)	Unassigned Rhodobacteraceae (Family)	0.318763	9	Cluster 1	Yes
bASV11873	Bacteria	Alphaproteobacteria	Rhodobacterales	Rhodobacteraceae	Unassigned Rhodobacteraceae (Family)	Unassigned Rhodobacteraceae (Family)	0.122822	1	Cluster 2	Yes
bASV11905	Bacteria	Alphaproteobacteria	Rhodobacterales	Rhodobacteraceae	Unassigned Rhodobacteraceae (Family)	Unassigned Rhodobacteraceae (Family)	0.322546	9	Cluster 1	No
bASV11924	Bacteria	Alphaproteobacteria	Rhodobacterales	Rhodobacteraceae	Unassigned Rhodobacteraceae (Family)	Unassigned Rhodobacteraceae (Family)	0.323243	7	Cluster 1	No
bASV11960	Bacteria	Alphaproteobacteria	Parvibaculales	Parvibaculaceae	uncultured	uncultured alpha proteobacterium	0.212797	2	Cluster 2	No
bASV12437	Bacteria	Alphaproteobacteria	Puniceispirillales	uncultured	Unassigned uncultured (Family)	Unassigned uncultured (Family)	0.299	7	Cluster 1	Yes
bASV12437	Bacteria	Alphaproteobacteria	Puniceispirillales	uncultured	Unassigned uncultured (Family)	Unassigned uncultured (Family)	0.221557	3	Cluster 2	Yes
bASV12442	Bacteria	Alphaproteobacteria	Puniceispirillales	uncultured	Unassigned uncultured (Family)	Unassigned uncultured (Family)	0.289448	5	Cluster 1	Yes
bASV12442	Bacteria	Alphaproteobacteria	Puniceispirillales	uncultured	Unassigned uncultured (Family)	Unassigned uncultured (Family)	0.234363	4	Cluster 2	Yes
bASV12445	Bacteria	Alphaproteobacteria	Puniceispirillales	uncultured	Unassigned uncultured (Family)	Unassigned uncultured (Family)	0.265542	3	Cluster 1	Yes
bASV12445	Bacteria	Alphaproteobacteria	Puniceispirillales	uncultured	Unassigned uncultured (Family)	Unassigned uncultured (Family)	0.186047	2	Cluster 2	Yes
bASV12447	Bacteria	Alphaproteobacteria	Puniceispirillales	uncultured	Unassigned uncultured (Family)	Unassigned uncultured (Family)	0.297217	8	Cluster 1	Yes
bASV12447	Bacteria	Alphaproteobacteria	Puniceispirillales	uncultured	Unassigned uncultured (Family)	Unassigned uncultured (Family)	0.235669	5	Cluster 2	Yes
bASV15493	Bacteria	Gammaproteobacteria	Cellvibrionales	Porticoccaceae	SAR92 clade	Unassigned SAR92 clade (Genus)	0.312762	7	Cluster 1	No
bASV15531	Bacteria	Gammaproteobacteria	Oceanospirillales	Litoricolaceae	Litoricola	uncultured bacterium	0.286124	6	Cluster 1	Yes
bASV15531	Bacteria	Gammaproteobacteria	Oceanospirillales	Litoricolaceae	Litoricola	uncultured bacterium	0.170115	1	Cluster 2	Yes
bASV15532	Bacteria	Gammaproteobacteria	Oceanospirillales	Litoricolaceae	Litoricola	uncultured bacterium	0.290573	4	Cluster 1	Yes
bASV15532	Bacteria	Gammaproteobacteria	Oceanospirillales	Litoricolaceae	Litoricola	uncultured bacterium	0.199059	3	Cluster 2	Yes
bASV15537	Bacteria	Gammaproteobacteria	Oceanospirillales	Litoricolaceae	Litoricola	Unassigned Litoricola (Genus)	0.279178	4	Cluster 1	No
bASV15714	Bacteria	Gammaproteobacteria	Thiomicrospirales	Thioglobaceae	SUP05 cluster	uncultured bacterium	0.215743	4	Cluster 2	No
bASV15715	Bacteria	Gammaproteobacteria	Thiomicrospirales	Thioglobaceae	SUP05 cluster	uncultured bacterium	0.301411	7	Cluster 1	No
bASV15716	Bacteria	Gammaproteobacteria	Thiomicrospirales	Thioglobaceae	SUP05 cluster	uncultured bacterium	0.23756	6	Cluster 2	No
bASV15719	Bacteria	Gammaproteobacteria	Thiomicrospirales	Thioglobaceae	SUP05 cluster	uncultured bacterium	0.262973	4	Cluster 1	Yes
bASV15719	Bacteria	Gammaproteobacteria	Thiomicrospirales	Thioglobaceae	SUP05 cluster	uncultured bacterium	0.225782	6	Cluster 2	Yes
bASV15721	Bacteria	Gammaproteobacteria	Thiomicrospirales	Thioglobaceae	SUP05 cluster	uncultured bacterium	0.299	5	Cluster 1	Yes
bASV15721	Bacteria	Gammaproteobacteria	Thiomicrospirales	Thioglobaceae	SUP05 cluster	uncultured bacterium	0.231793	3	Cluster 2	Yes
bASV15722	Bacteria	Gammaproteobacteria	Thiomicrospirales	Thioglobaceae	SUP05 cluster	uncultured bacterium	0.248545	2	Cluster 1	No
bASV15724	Bacteria	Gammaproteobacteria	Thiomicrospirales	Thioglobaceae	SUP05 cluster	uncultured bacterium	0.274816	5	Cluster 1	Yes
bASV15724	Bacteria	Gammaproteobacteria	Thiomicrospirales	Thioglobaceae	SUP05 cluster	uncultured bacterium	0.223228	6	Cluster 2	Yes
bASV15733	Bacteria	Gammaproteobacteria	Thiomicrospirales	Thioglobaceae	SUP05 cluster	uncultured bacterium	0.170999	2	Cluster 2	No
bASV15735	Bacteria	Gammaproteobacteria	Thiomicrospirales	Thioglobaceae	SUP05 cluster	uncultured bacterium	0.336333	10	Cluster 1	Yes
bASV15735	Bacteria	Gammaproteobacteria	Thiomicrospirales	Thioglobaceae	SUP05 cluster	uncultured bacterium	0.206272	2	Cluster 2	Yes
bASV15935	Bacteria	Gammaproteobacteria	Thiotrichales	Thiotrichaceae	uncultured	uncultured bacterium JM9_B4	0.247285	4	Cluster 2	No
bASV16042	Bacteria	Gammaproteobacteria	UBA10353 marine group	Unassigned UBA10353 marine group (Order)	Unassigned UBA10353 marine group (Order)	Unassigned UBA10353 marine group (Order)	0.249368	5	Cluster 2	No
bASV16715	Bacteria	Gammaproteobacteria	SAR86 clade	uncultured gamma proteobacterium	uncultured gamma proteobacterium	uncultured gamma proteobacterium	0.212491	2	Cluster 2	No
bASV16716	Bacteria	Gammaproteobacteria	SAR86 clade	uncultured gamma proteobacterium	uncultured gamma proteobacterium	uncultured gamma proteobacterium	0.274816	6	Cluster 1	Yes
bASV16716	Bacteria	Gammaproteobacteria	SAR86 clade	uncultured gamma proteobacterium	uncultured gamma proteobacterium	uncultured gamma proteobacterium	0.175355	1	Cluster 2	Yes
bASV16718	Bacteria	Gammaproteobacteria	SAR86 clade	uncultured gamma proteobacterium	uncultured gamma proteobacterium	uncultured gamma proteobacterium	0.197597	3	Cluster 2	No
bASV16721	Bacteria	Gammaproteobacteria	SAR86 clade	uncultured gamma proteobacterium	uncultured gamma proteobacterium	uncultured gamma proteobacterium	0.311134	8	Cluster 1	Yes
bASV16721	Bacteria	Gammaproteobacteria	SAR86 clade	uncultured gamma proteobacterium	uncultured gamma proteobacterium	uncultured gamma proteobacterium	0.189137	1	Cluster 2	Yes
bASV16722	Bacteria	Gammaproteobacteria	SAR86 clade	uncultured gamma proteobacterium	uncultured gamma proteobacterium	uncultured gamma proteobacterium	0.204986	2	Cluster 2	No
bASV16734	Bacteria	Gammaproteobacteria	SAR86 clade	Unassigned SAR86 clade (Order)	Unassigned SAR86 clade (Order)	Unassigned SAR86 clade (Order)	0.286124	6	Cluster 1	No
bASV16740	Bacteria	Gammaproteobacteria	SAR86 clade	Unassigned SAR86 clade (Order)	Unassigned SAR86 clade (Order)	Unassigned SAR86 clade (Order)	0.299	6	Cluster 1	No
bASV16742	Bacteria	Gammaproteobacteria	SAR86 clade	Unassigned SAR86 clade (Order)	Unassigned SAR86 clade (Order)	Unassigned SAR86 clade (Order)	0.277881	3	Cluster 1	No
bASV16749	Bacteria	Gammaproteobacteria	SAR86 clade	Unassigned SAR86 clade (Order)	Unassigned SAR86 clade (Order)	Unassigned SAR86 clade (Order)	0.271571	3	Cluster 1	No
bASV16759	Bacteria	Gammaproteobacteria	SAR86 clade	Unassigned SAR86 clade (Order)	Unassigned SAR86 clade (Order)	Unassigned SAR86 clade (Order)	0.283144	3	Cluster 1	No
bASV16774	Bacteria	Gammaproteobacteria	SAR86 clade	Unassigned SAR86 clade (Order)	Unassigned SAR86 clade (Order)	Unassigned SAR86 clade (Order)	0.304481	5	Cluster 1	Yes
bASV16774	Bacteria	Gammaproteobacteria	SAR86 clade	Unassigned SAR86 clade (Order)	Unassigned SAR86 clade (Order)	Unassigned SAR86 clade (Order)	0.215586	1	Cluster 2	Yes
bASV16776	Bacteria	Gammaproteobacteria	SAR86 clade	Unassigned SAR86 clade (Order)	Unassigned SAR86 clade (Order)	Unassigned SAR86 clade (Order)	0.266726	4	Cluster 1	Yes
bASV16776	Bacteria	Gammaproteobacteria	SAR86 clade	Unassigned SAR86 clade (Order)	Unassigned SAR86 clade (Order)	Unassigned SAR86 clade (Order)	0.170999	2	Cluster 2	Yes
bASV16777	Bacteria	Gammaproteobacteria	SAR86 clade	Unassigned SAR86 clade (Order)	Unassigned SAR86 clade (Order)	Unassigned SAR86 clade (Order)	0.248133	3	Cluster 1	Yes
bASV16777	Bacteria	Gammaproteobacteria	SAR86 clade	Unassigned SAR86 clade (Order)	Unassigned SAR86 clade (Order)	Unassigned SAR86 clade (Order)	0.217807	4	Cluster 2	Yes
bASV16778	Bacteria	Gammaproteobacteria	SAR86 clade	Unassigned SAR86 clade (Order)	Unassigned SAR86 clade (Order)	Unassigned SAR86 clade (Order)	0.205413	2	Cluster 2	No
bASV16780	Bacteria	Gammaproteobacteria	SAR86 clade	Unassigned SAR86 clade (Order)	Unassigned SAR86 clade (Order)	Unassigned SAR86 clade (Order)	0.305102	8	Cluster 1	No
bASV16783	Bacteria	Gammaproteobacteria	SAR86 clade	Unassigned SAR86 clade (Order)	Unassigned SAR86 clade (Order)	Unassigned SAR86 clade (Order)	0.308566	6	Cluster 1	Yes
bASV16783	Bacteria	Gammaproteobacteria	SAR86 clade	Unassigned SAR86 clade (Order)	Unassigned SAR86 clade (Order)	Unassigned SAR86 clade (Order)	0.191214	2	Cluster 2	Yes
bASV16796	Bacteria	Gammaproteobacteria	SAR86 clade	Unassigned SAR86 clade (Order)	Unassigned SAR86 clade (Order)	Unassigned SAR86 clade (Order)	0.306352	6	Cluster 1	No
bASV16799	Bacteria	Gammaproteobacteria	SAR86 clade	Unassigned SAR86 clade (Order)	Unassigned SAR86 clade (Order)	Unassigned SAR86 clade (Order)	0.319786	7	Cluster 1	No
bASV17043	Bacteria	Gammaproteobacteria	Betaproteobacteriales	Burkholderiaceae	RS62 marine group	uncultured bacterium	0.275322	4	Cluster 1	No
bASV17044	Bacteria	Gammaproteobacteria	Betaproteobacteriales	Burkholderiaceae	RS62 marine group	uncultured bacterium	0.290573	6	Cluster 1	No
bASV17082	Bacteria	Gammaproteobacteria	Betaproteobacteriales	Nitrosomonadaceae	Unassigned Nitrosomonadaceae (Family)	Unassigned Nitrosomonadaceae (Family)	0.222724	3	Cluster 2	No
bASV17131	Bacteria	Gammaproteobacteria	Betaproteobacteriales	Nitrosomonadaceae	IS-44	uncultured beta proteobacterium	0.220896	2	Cluster 2	No
bASV17134	Bacteria	Gammaproteobacteria	Betaproteobacteriales	Nitrosomonadaceae	IS-44	uncultured beta proteobacterium	0.240065	5	Cluster 2	No
bASV17135	Bacteria	Gammaproteobacteria	Betaproteobacteriales	Nitrosomonadaceae	IS-44	uncultured beta proteobacterium	0.206272	2	Cluster 2	No
bASV17216	Bacteria	Gammaproteobacteria	Betaproteobacteriales	Methylophilaceae	OM43 clade	Unassigned OM43 clade (Genus)	0.219259	3	Cluster 2	No
bASV17219	Bacteria	Gammaproteobacteria	Betaproteobacteriales	Methylophilaceae	OM43 clade	Unassigned OM43 clade (Genus)	0.235294	4	Cluster 2	No
bASV17222	Bacteria	Gammaproteobacteria	Betaproteobacteriales	Methylophilaceae	OM43 clade	Unassigned OM43 clade (Genus)	0.299599	5	Cluster 1	No
bASV17224	Bacteria	Gammaproteobacteria	Betaproteobacteriales	Methylophilaceae	OM43 clade	Unassigned OM43 clade (Genus)	0.308566	7	Cluster 1	No
bASV17230	Bacteria	Gammaproteobacteria	Betaproteobacteriales	Methylophilaceae	OM43 clade	Unassigned OM43 clade (Genus)	0.278399	5	Cluster 1	No
bASV17232	Bacteria	Gammaproteobacteria	Betaproteobacteriales	Methylophilaceae	OM43 clade	Unassigned OM43 clade (Genus)	0.306039	5	Cluster 1	Yes
bASV17232	Bacteria	Gammaproteobacteria	Betaproteobacteriales	Methylophilaceae	OM43 clade	Unassigned OM43 clade (Genus)	0.200271	1	Cluster 2	Yes
bASV17233	Bacteria	Gammaproteobacteria	Betaproteobacteriales	Methylophilaceae	OM43 clade	Unassigned OM43 clade (Genus)	0.24026	3	Cluster 2	No
bASV17242	Bacteria	Gammaproteobacteria	Betaproteobacteriales	Methylophilaceae	OM43 clade	Unassigned OM43 clade (Genus)	0.200542	2	Cluster 2	No
bASV17243	Bacteria	Gammaproteobacteria	Betaproteobacteriales	Methylophilaceae	OM43 clade	Unassigned OM43 clade (Genus)	0.304171	7	Cluster 1	Yes
bASV17243	Bacteria	Gammaproteobacteria	Betaproteobacteriales	Methylophilaceae	OM43 clade	Unassigned OM43 clade (Genus)	0.199461	2	Cluster 2	Yes
bASV17244	Bacteria	Gammaproteobacteria	Betaproteobacteriales	Methylophilaceae	OM43 clade	Unassigned OM43 clade (Genus)	0.299	5	Cluster 1	Yes
bASV17244	Bacteria	Gammaproteobacteria	Betaproteobacteriales	Methylophilaceae	OM43 clade	Unassigned OM43 clade (Genus)	0.235107	4	Cluster 2	Yes
bASV17256	Bacteria	Gammaproteobacteria	Betaproteobacteriales	Methylophilaceae	OM43 clade	Unassigned OM43 clade (Genus)	0.304791	7	Cluster 1	No
bASV17731	Bacteria	Gammaproteobacteria	Cellvibrionales	Halieaceae	OM60(NOR5) clade	Unassigned OM60(NOR5) clade (Genus)	0.227517	4	Cluster 2	No
bASV17736	Bacteria	Gammaproteobacteria	Cellvibrionales	Halieaceae	OM60(NOR5) clade	Unassigned OM60(NOR5) clade (Genus)	0.295747	5	Cluster 1	No
bASV17739	Bacteria	Gammaproteobacteria	Cellvibrionales	Halieaceae	OM60(NOR5) clade	Unassigned OM60(NOR5) clade (Genus)	0.295163	4	Cluster 1	Yes
bASV17739	Bacteria	Gammaproteobacteria	Cellvibrionales	Halieaceae	OM60(NOR5) clade	Unassigned OM60(NOR5) clade (Genus)	0.221889	3	Cluster 2	Yes
bASV17819	Bacteria	Gammaproteobacteria	Cellvibrionales	Halieaceae	Luminiphilus	uncultured gamma proteobacterium	0.347674	14	Cluster 1	No
bASV17971	Bacteria	Gammaproteobacteria	OM182 clade	OM182 bacterium D4	OM182 bacterium D4	OM182 bacterium D4	0.320128	8	Cluster 1	No
bASV17996	Bacteria	Gammaproteobacteria	Cellvibrionales	Spongiibacteraceae	Unassigned Spongiibacteraceae (Family)	Unassigned Spongiibacteraceae (Family)	0.295455	7	Cluster 1	No
bASV18264	Bacteria	Gammaproteobacteria	Oceanospirillales	Pseudohongiellaceae	Pseudohongiella	Unassigned Pseudohongiella (Genus)	0.318085	7	Cluster 1	No
bASV18269	Bacteria	Gammaproteobacteria	Oceanospirillales	Pseudohongiellaceae	Pseudohongiella	Unassigned Pseudohongiella (Genus)	0.318424	8	Cluster 1	No
bASV18272	Bacteria	Gammaproteobacteria	Oceanospirillales	Pseudohongiellaceae	Pseudohongiella	Unassigned Pseudohongiella (Genus)	0.296627	5	Cluster 1	No
bASV2746	Bacteria	Oxyphotobacteria	Synechococcales	Cyanobiaceae	Cyanobium PCC-6307	uncultured cyanobacterium	0.162459	2	Cluster 2	No
bASV2747	Bacteria	Oxyphotobacteria	Synechococcales	Cyanobiaceae	Cyanobium PCC-6307	uncultured cyanobacterium	0.241042	5	Cluster 2	No
bASV2748	Bacteria	Oxyphotobacteria	Synechococcales	Cyanobiaceae	Cyanobium PCC-6307	uncultured cyanobacterium	0.202324	3	Cluster 2	No
bASV2750	Bacteria	Oxyphotobacteria	Synechococcales	Cyanobiaceae	Cyanobium PCC-6307	uncultured cyanobacterium	0.231612	4	Cluster 2	No
bASV2756	Bacteria	Oxyphotobacteria	Synechococcales	Cyanobiaceae	Cyanobium PCC-6307	uncultured cyanobacterium	0.212339	1	Cluster 2	No
bASV3388	Archaea	Nitrososphaeria	Nitrosopumilales	Nitrosopumilaceae	Candidatus Nitrosopumilus	Unassigned Candidatus Nitrosopumilus (Genus)	0.199192	3	Cluster 2	No
bASV3390	Archaea	Nitrososphaeria	Nitrosopumilales	Nitrosopumilaceae	Candidatus Nitrosopumilus	Unassigned Candidatus Nitrosopumilus (Genus)	0.251487	7	Cluster 2	No
bASV3403	Archaea	Nitrososphaeria	Nitrosopumilales	Nitrosopumilaceae	Candidatus Nitrosopumilus	Unassigned Candidatus Nitrosopumilus (Genus)	0.241042	4	Cluster 2	No
bASV3418	Archaea	Nitrososphaeria	Nitrosopumilales	Nitrosopumilaceae	Candidatus Nitrosopumilus	Unassigned Candidatus Nitrosopumilus (Genus)	0.193844	2	Cluster 2	No
bASV3419	Archaea	Nitrososphaeria	Nitrosopumilales	Nitrosopumilaceae	Candidatus Nitrosopumilus	Unassigned Candidatus Nitrosopumilus (Genus)	0.234363	2	Cluster 2	No
bASV3420	Archaea	Nitrososphaeria	Nitrosopumilales	Nitrosopumilaceae	Candidatus Nitrosopumilus	Unassigned Candidatus Nitrosopumilus (Genus)	0.187105	2	Cluster 2	No
bASV3593	Archaea	Thermoplasmata	Marine Group II	uncultured marine archaeon DCM3921	uncultured marine archaeon DCM3921	uncultured marine archaeon DCM3921	0.305726	8	Cluster 1	No
bASV3706	Archaea	Thermoplasmata	Marine Group II	marine metagenome	marine metagenome	marine metagenome	0.282342	4	Cluster 1	No
bASV3708	Archaea	Thermoplasmata	Marine Group II	marine metagenome	marine metagenome	marine metagenome	0.306039	6	Cluster 1	No
bASV3722	Archaea	Thermoplasmata	Marine Group II	marine metagenome	marine metagenome	marine metagenome	0.212034	2	Cluster 2	No
bASV3728	Archaea	Thermoplasmata	Marine Group II	marine metagenome	marine metagenome	marine metagenome	0.264368	2	Cluster 1	No
bASV5016	Bacteria	Bacteroidia	Sphingobacteriales	NS11-12 marine group	uncultured Bacteroidetes bacterium	uncultured Bacteroidetes bacterium	0.296627	6	Cluster 1	No
bASV5017	Bacteria	Bacteroidia	Sphingobacteriales	NS11-12 marine group	uncultured Bacteroidetes bacterium	uncultured Bacteroidetes bacterium	0.323944	8	Cluster 1	No
bASV520	Bacteria	Alphaproteobacteria	SAR11 clade	Unassigned SAR11 clade (Order)	Unassigned SAR11 clade (Order)	Unassigned SAR11 clade (Order)	0.171694	1	Cluster 2	No
bASV522	Bacteria	Alphaproteobacteria	SAR11 clade	Unassigned SAR11 clade (Order)	Unassigned SAR11 clade (Order)	Unassigned SAR11 clade (Order)	0.196156	3	Cluster 2	No
bASV523	Bacteria	Alphaproteobacteria	SAR11 clade	Unassigned SAR11 clade (Order)	Unassigned SAR11 clade (Order)	Unassigned SAR11 clade (Order)	0.165086	1	Cluster 2	No
bASV527	Bacteria	Alphaproteobacteria	SAR11 clade	Unassigned SAR11 clade (Order)	Unassigned SAR11 clade (Order)	Unassigned SAR11 clade (Order)	0.222892	5	Cluster 2	No
bASV534	Bacteria	Alphaproteobacteria	SAR11 clade	Unassigned SAR11 clade (Order)	Unassigned SAR11 clade (Order)	Unassigned SAR11 clade (Order)	0.194609	2	Cluster 2	No
bASV535	Bacteria	Alphaproteobacteria	SAR11 clade	Unassigned SAR11 clade (Order)	Unassigned SAR11 clade (Order)	Unassigned SAR11 clade (Order)	0.248114	5	Cluster 2	No
bASV539	Bacteria	Alphaproteobacteria	SAR11 clade	Clade II	Unassigned Clade II (Family)	Unassigned Clade II (Family)	0.293425	5	Cluster 1	Yes
bASV539	Bacteria	Alphaproteobacteria	SAR11 clade	Clade II	Unassigned Clade II (Family)	Unassigned Clade II (Family)	0.195767	1	Cluster 2	Yes
bASV545	Bacteria	Alphaproteobacteria	SAR11 clade	Clade II	Unassigned Clade II (Family)	Unassigned Clade II (Family)	0.269856	5	Cluster 1	No
bASV5455	Bacteria	Bacteroidia	Chitinophagales	Saprospiraceae	uncultured	uncultured bacterium	0.213873	4	Cluster 2	No
bASV5467	Bacteria	Bacteroidia	Chitinophagales	Saprospiraceae	uncultured	uncultured bacterium	0.210676	3	Cluster 2	No
bASV547	Bacteria	Alphaproteobacteria	SAR11 clade	Clade II	Unassigned Clade II (Family)	Unassigned Clade II (Family)	0.189137	1	Cluster 2	No
bASV549	Bacteria	Alphaproteobacteria	SAR11 clade	Clade II	Unassigned Clade II (Family)	Unassigned Clade II (Family)	0.256055	3	Cluster 2	No
bASV564	Bacteria	Alphaproteobacteria	SAR11 clade	Clade II	Unassigned Clade II (Family)	Unassigned Clade II (Family)	0.285033	5	Cluster 1	Yes
bASV564	Bacteria	Alphaproteobacteria	SAR11 clade	Clade II	Unassigned Clade II (Family)	Unassigned Clade II (Family)	0.196809	2	Cluster 2	Yes
bASV576	Bacteria	Alphaproteobacteria	SAR11 clade	Clade II	Unassigned Clade II (Family)	Unassigned Clade II (Family)	0.237751	4	Cluster 2	No
bASV585	Bacteria	Alphaproteobacteria	SAR11 clade	Clade II	Unassigned Clade II (Family)	Unassigned Clade II (Family)	0.243221	3	Cluster 2	No
bASV5899	Bacteria	Bacteroidia	Flavobacteriales	Cryomorphaceae	uncultured	Unassigned uncultured (Genus)	0.337472	11	Cluster 1	Yes
bASV5899	Bacteria	Bacteroidia	Flavobacteriales	Cryomorphaceae	uncultured	Unassigned uncultured (Genus)	0.226127	2	Cluster 2	Yes
bASV5900	Bacteria	Bacteroidia	Flavobacteriales	Cryomorphaceae	uncultured	Unassigned uncultured (Genus)	0.248339	3	Cluster 1	No
bASV5901	Bacteria	Bacteroidia	Flavobacteriales	Cryomorphaceae	uncultured	Unassigned uncultured (Genus)	0.312762	8	Cluster 1	No
bASV5903	Bacteria	Bacteroidia	Flavobacteriales	Cryomorphaceae	uncultured	Unassigned uncultured (Genus)	0.305726	6	Cluster 1	No
bASV5906	Bacteria	Bacteroidia	Flavobacteriales	Cryomorphaceae	uncultured	Unassigned uncultured (Genus)	0.295455	5	Cluster 1	Yes
bASV5906	Bacteria	Bacteroidia	Flavobacteriales	Cryomorphaceae	uncultured	Unassigned uncultured (Genus)	0.193338	4	Cluster 2	Yes
bASV5964	Bacteria	Bacteroidia	Flavobacteriales	Cryomorphaceae	uncultured	uncultured bacterium	0.186398	2	Cluster 2	No
bASV5967	Bacteria	Bacteroidia	Flavobacteriales	Cryomorphaceae	uncultured	uncultured bacterium	0.211127	2	Cluster 2	No
bASV6192	Bacteria	Bacteroidia	Flavobacteriales	Flavobacteriaceae	NS5 marine group	uncultured Flavobacterium sp.	0.331853	9	Cluster 1	Yes
bASV6192	Bacteria	Bacteroidia	Flavobacteriales	Flavobacteriaceae	NS5 marine group	uncultured Flavobacterium sp.	0.207719	2	Cluster 2	Yes
bASV6193	Bacteria	Bacteroidia	Flavobacteriales	Flavobacteriaceae	NS5 marine group	uncultured Flavobacterium sp.	0.283951	4	Cluster 1	Yes
bASV6193	Bacteria	Bacteroidia	Flavobacteriales	Flavobacteriaceae	NS5 marine group	uncultured Flavobacterium sp.	0.193338	3	Cluster 2	Yes
bASV6201	Bacteria	Bacteroidia	Flavobacteriales	Flavobacteriaceae	NS5 marine group	uncultured Flavobacterium sp.	0.302632	9	Cluster 1	Yes
bASV6201	Bacteria	Bacteroidia	Flavobacteriales	Flavobacteriaceae	NS5 marine group	uncultured Flavobacterium sp.	0.243021	3	Cluster 2	Yes
bASV6204	Bacteria	Bacteroidia	Flavobacteriales	Flavobacteriaceae	NS5 marine group	uncultured Flavobacterium sp.	0.328933	10	Cluster 1	No
bASV6205	Bacteria	Bacteroidia	Flavobacteriales	Flavobacteriaceae	NS5 marine group	uncultured Flavobacterium sp.	0.219097	7	Cluster 2	No
bASV6225	Bacteria	Bacteroidia	Flavobacteriales	Flavobacteriaceae	NS5 marine group	uncultured Bacteroidetes bacterium	0.326776	8	Cluster 1	No
bASV6259	Bacteria	Bacteroidia	Flavobacteriales	Flavobacteriaceae	NS5 marine group	Unassigned NS5 marine group (Genus)	0.286948	5	Cluster 1	No
bASV6260	Bacteria	Bacteroidia	Flavobacteriales	Flavobacteriaceae	NS5 marine group	Unassigned NS5 marine group (Genus)	0.293137	6	Cluster 1	No
bASV6277	Bacteria	Bacteroidia	Flavobacteriales	Flavobacteriaceae	NS5 marine group	uncultured Flavobacterium sp.	0.306352	6	Cluster 1	Yes
bASV6277	Bacteria	Bacteroidia	Flavobacteriales	Flavobacteriaceae	NS5 marine group	uncultured Flavobacterium sp.	0.197071	2	Cluster 2	Yes
bASV6279	Bacteria	Bacteroidia	Flavobacteriales	Flavobacteriaceae	NS5 marine group	uncultured Flavobacterium sp.	0.304791	8	Cluster 1	Yes
bASV6279	Bacteria	Bacteroidia	Flavobacteriales	Flavobacteriaceae	NS5 marine group	uncultured Flavobacterium sp.	0.273567	6	Cluster 2	Yes
bASV6280	Bacteria	Bacteroidia	Flavobacteriales	Flavobacteriaceae	NS5 marine group	uncultured Flavobacterium sp.	0.229992	3	Cluster 2	No
bASV6282	Bacteria	Bacteroidia	Flavobacteriales	Flavobacteriaceae	NS5 marine group	uncultured Flavobacterium sp.	0.205985	3	Cluster 2	No
bASV6285	Bacteria	Bacteroidia	Flavobacteriales	Flavobacteriaceae	NS5 marine group	uncultured Flavobacterium sp.	0.309204	5	Cluster 1	No
bASV6311	Bacteria	Bacteroidia	Flavobacteriales	Flavobacteriaceae	NS5 marine group	marine metagenome	0.227168	3	Cluster 2	No
bASV632	Bacteria	Alphaproteobacteria	SAR11 clade	Clade I	Unassigned Clade I (Family)	Unassigned Clade I (Family)	0.221226	2	Cluster 2	No
bASV642	Bacteria	Alphaproteobacteria	SAR11 clade	Clade I	Clade Ia	Unassigned Clade Ia (Genus)	0.323944	9	Cluster 1	Yes
bASV642	Bacteria	Alphaproteobacteria	SAR11 clade	Clade I	Clade Ia	Unassigned Clade Ia (Genus)	0.234734	3	Cluster 2	Yes
bASV643	Bacteria	Alphaproteobacteria	SAR11 clade	Clade I	Clade Ia	Unassigned Clade Ia (Genus)	0.300805	7	Cluster 1	Yes
bASV643	Bacteria	Alphaproteobacteria	SAR11 clade	Clade I	Clade Ia	Unassigned Clade Ia (Genus)	0.187817	2	Cluster 2	Yes
bASV644	Bacteria	Alphaproteobacteria	SAR11 clade	Clade I	Clade Ia	Unassigned Clade Ia (Genus)	0.309845	7	Cluster 1	No
bASV645	Bacteria	Alphaproteobacteria	SAR11 clade	Clade I	Clade Ia	Unassigned Clade Ia (Genus)	0.249578	7	Cluster 2	No
bASV646	Bacteria	Alphaproteobacteria	SAR11 clade	Clade I	Clade Ia	Unassigned Clade Ia (Genus)	0.305414	7	Cluster 1	No
bASV6461	Bacteria	Bacteroidia	Flavobacteriales	Flavobacteriaceae	NS5 marine group	Unassigned NS5 marine group (Genus)	0.209335	2	Cluster 2	No
bASV647	Bacteria	Alphaproteobacteria	SAR11 clade	Clade I	Clade Ia	Unassigned Clade Ia (Genus)	0.312435	6	Cluster 1	Yes
bASV647	Bacteria	Alphaproteobacteria	SAR11 clade	Clade I	Clade Ia	Unassigned Clade Ia (Genus)	0.182491	2	Cluster 2	Yes
bASV6477	Bacteria	Bacteroidia	Flavobacteriales	Flavobacteriaceae	NS5 marine group	Unassigned NS5 marine group (Genus)	0.304171	7	Cluster 1	Yes
bASV6477	Bacteria	Bacteroidia	Flavobacteriales	Flavobacteriaceae	NS5 marine group	Unassigned NS5 marine group (Genus)	0.240846	3	Cluster 2	Yes
bASV648	Bacteria	Alphaproteobacteria	SAR11 clade	Clade I	Clade Ia	Unassigned Clade Ia (Genus)	0.301411	7	Cluster 1	No
bASV650	Bacteria	Alphaproteobacteria	SAR11 clade	Clade I	Clade Ia	Unassigned Clade Ia (Genus)	0.297512	5	Cluster 1	No
bASV652	Bacteria	Alphaproteobacteria	SAR11 clade	Clade I	Clade Ia	Unassigned Clade Ia (Genus)	0.294002	7	Cluster 1	Yes
bASV652	Bacteria	Alphaproteobacteria	SAR11 clade	Clade I	Clade Ia	Unassigned Clade Ia (Genus)	0.205413	3	Cluster 2	Yes
bASV653	Bacteria	Alphaproteobacteria	SAR11 clade	Clade I	Clade Ia	Unassigned Clade Ia (Genus)	0.272313	6	Cluster 1	Yes
bASV653	Bacteria	Alphaproteobacteria	SAR11 clade	Clade I	Clade Ia	Unassigned Clade Ia (Genus)	0.211127	3	Cluster 2	Yes
bASV6546	Bacteria	Bacteroidia	Flavobacteriales	Flavobacteriaceae	NS4 marine group	Unassigned NS4 marine group (Genus)	0.278399	6	Cluster 1	Yes
bASV6546	Bacteria	Bacteroidia	Flavobacteriales	Flavobacteriaceae	NS4 marine group	Unassigned NS4 marine group (Genus)	0.209483	2	Cluster 2	Yes
bASV6547	Bacteria	Bacteroidia	Flavobacteriales	Flavobacteriaceae	NS4 marine group	Unassigned NS4 marine group (Genus)	0.272066	4	Cluster 1	Yes
bASV6547	Bacteria	Bacteroidia	Flavobacteriales	Flavobacteriaceae	NS4 marine group	Unassigned NS4 marine group (Genus)	0.201361	2	Cluster 2	Yes
bASV655	Bacteria	Alphaproteobacteria	SAR11 clade	Clade I	Clade Ia	Unassigned Clade Ia (Genus)	0.318763	10	Cluster 1	Yes
bASV655	Bacteria	Alphaproteobacteria	SAR11 clade	Clade I	Clade Ia	Unassigned Clade Ia (Genus)	0.222389	4	Cluster 2	Yes
bASV6550	Bacteria	Bacteroidia	Flavobacteriales	Flavobacteriaceae	NS4 marine group	Unassigned NS4 marine group (Genus)	0.227692	4	Cluster 2	No
bASV6554	Bacteria	Bacteroidia	Flavobacteriales	Flavobacteriaceae	NS4 marine group	Unassigned NS4 marine group (Genus)	0.208745	4	Cluster 2	No
bASV656	Bacteria	Alphaproteobacteria	SAR11 clade	Clade I	Clade Ia	Unassigned Clade Ia (Genus)	0.269612	5	Cluster 1	Yes
bASV656	Bacteria	Alphaproteobacteria	SAR11 clade	Clade I	Clade Ia	Unassigned Clade Ia (Genus)	0.219422	5	Cluster 2	Yes
bASV657	Bacteria	Alphaproteobacteria	SAR11 clade	Clade I	Clade Ia	Unassigned Clade Ia (Genus)	0.294872	5	Cluster 1	Yes
bASV657	Bacteria	Alphaproteobacteria	SAR11 clade	Clade I	Clade Ia	Unassigned Clade Ia (Genus)	0.185232	2	Cluster 2	Yes
bASV658	Bacteria	Alphaproteobacteria	SAR11 clade	Clade I	Clade Ia	Unassigned Clade Ia (Genus)	0.200271	4	Cluster 2	No
bASV661	Bacteria	Alphaproteobacteria	SAR11 clade	Clade I	Clade Ia	Unassigned Clade Ia (Genus)	0.310811	7	Cluster 1	Yes
bASV661	Bacteria	Alphaproteobacteria	SAR11 clade	Clade I	Clade Ia	Unassigned Clade Ia (Genus)	0.197465	2	Cluster 2	Yes
bASV662	Bacteria	Alphaproteobacteria	SAR11 clade	Clade I	Clade Ia	Unassigned Clade Ia (Genus)	0.185696	1	Cluster 2	No
bASV6638	Bacteria	Bacteroidia	Flavobacteriales	Flavobacteriaceae	Formosa	Unassigned Formosa (Genus)	0.291707	6	Cluster 1	No
bASV666	Bacteria	Alphaproteobacteria	SAR11 clade	Clade I	Clade Ia	Unassigned Clade Ia (Genus)	0.207138	3	Cluster 2	No
bASV669	Bacteria	Alphaproteobacteria	SAR11 clade	Clade I	Clade Ia	Unassigned Clade Ia (Genus)	0.301108	6	Cluster 1	No
bASV674	Bacteria	Alphaproteobacteria	SAR11 clade	Clade I	Clade Ia	Unassigned Clade Ia (Genus)	0.290573	7	Cluster 1	Yes
bASV674	Bacteria	Alphaproteobacteria	SAR11 clade	Clade I	Clade Ia	Unassigned Clade Ia (Genus)	0.198791	2	Cluster 2	Yes
bASV675	Bacteria	Alphaproteobacteria	SAR11 clade	Clade I	Clade Ia	Unassigned Clade Ia (Genus)	0.285578	5	Cluster 1	Yes
bASV675	Bacteria	Alphaproteobacteria	SAR11 clade	Clade I	Clade Ia	Unassigned Clade Ia (Genus)	0.208011	4	Cluster 2	Yes
bASV676	Bacteria	Alphaproteobacteria	SAR11 clade	Clade I	Clade Ia	Unassigned Clade Ia (Genus)	0.204844	5	Cluster 2	No
bASV679	Bacteria	Alphaproteobacteria	SAR11 clade	Clade I	Clade Ia	Unassigned Clade Ia (Genus)	0.313417	5	Cluster 1	Yes
bASV679	Bacteria	Alphaproteobacteria	SAR11 clade	Clade I	Clade Ia	Unassigned Clade Ia (Genus)	0.224753	5	Cluster 2	Yes
bASV6791	Bacteria	Bacteroidia	Flavobacteriales	Flavobacteriaceae	Aureimarina	Unassigned Aureimarina (Genus)	0.337091	9	Cluster 1	No
bASV680	Bacteria	Alphaproteobacteria	SAR11 clade	Clade I	Clade Ia	Unassigned Clade Ia (Genus)	0.315068	9	Cluster 1	Yes
bASV680	Bacteria	Alphaproteobacteria	SAR11 clade	Clade I	Clade Ia	Unassigned Clade Ia (Genus)	0.21496	5	Cluster 2	Yes
bASV6841	Bacteria	Bacteroidia	Flavobacteriales	Flavobacteriaceae	NS3a marine group	Unassigned NS3a marine group (Genus)	0.337853	10	Cluster 1	No
bASV6842	Bacteria	Bacteroidia	Flavobacteriales	Flavobacteriaceae	NS3a marine group	Unassigned NS3a marine group (Genus)	0.330752	9	Cluster 1	No
bASV7030	Bacteria	Bacteroidia	Flavobacteriales	Flavobacteriaceae	uncultured	marine metagenome	0.293137	5	Cluster 1	No
bASV7034	Bacteria	Bacteroidia	Flavobacteriales	Flavobacteriaceae	uncultured	marine metagenome	0.29604	5	Cluster 1	No
bASV704	Bacteria	Alphaproteobacteria	SAR11 clade	Clade III	Unassigned Clade III (Family)	Unassigned Clade III (Family)	0.323944	7	Cluster 1	No
bASV7135	Bacteria	Bacteroidia	Flavobacteriales	Flavobacteriaceae	uncultured	Flavobacteriaceae bacterium LE20	0.315068	7	Cluster 1	No
bASV721	Bacteria	Alphaproteobacteria	SAR11 clade	Clade III	Unassigned Clade III (Family)	Unassigned Clade III (Family)	0.289168	3	Cluster 1	No
bASV7452	Bacteria	Bacteroidia	Flavobacteriales	Crocinitomicaceae	Crocinitomix	unidentified marine bacterioplankton	0.320815	8	Cluster 1	No
bASV748	Bacteria	Alphaproteobacteria	SAR11 clade	Clade III	alpha proteobacterium HIMB114	alpha proteobacterium HIMB114	0.214804	3	Cluster 2	No
bASV749	Bacteria	Alphaproteobacteria	SAR11 clade	Clade III	alpha proteobacterium HIMB114	alpha proteobacterium HIMB114	0.227868	4	Cluster 2	No
bASV752	Bacteria	Alphaproteobacteria	SAR11 clade	Clade III	alpha proteobacterium HIMB114	alpha proteobacterium HIMB114	0.214182	2	Cluster 2	No
bASV755	Bacteria	Alphaproteobacteria	SAR11 clade	Clade III	alpha proteobacterium HIMB114	alpha proteobacterium HIMB114	0.219259	2	Cluster 2	No
bASV759	Bacteria	Alphaproteobacteria	SAR11 clade	Clade III	alpha proteobacterium HIMB114	alpha proteobacterium HIMB114	0.200814	3	Cluster 2	No
bASV8100	Bacteria	Pla3 lineage	unidentified marine bacterioplankton	unidentified marine bacterioplankton	unidentified marine bacterioplankton	unidentified marine bacterioplankton	0.225954	3	Cluster 2	No
bASV8348	Bacteria	Planctomycetacia	Planctomycetales	Rubinisphaeraceae	uncultured	uncultured Planctomycetia bacterium	0.235669	3	Cluster 2	No
bASV8494	Bacteria	Deltaproteobacteria	SAR324 clade(Marine group B)	uncultured bacterium HF0010_10I05	uncultured bacterium HF0010_10I05	uncultured bacterium HF0010_10I05	0.290573	5	Cluster 1	Yes
bASV8494	Bacteria	Deltaproteobacteria	SAR324 clade(Marine group B)	uncultured bacterium HF0010_10I05	uncultured bacterium HF0010_10I05	uncultured bacterium HF0010_10I05	0.195251	3	Cluster 2	Yes
bASV8497	Bacteria	Deltaproteobacteria	SAR324 clade(Marine group B)	uncultured bacterium HF0010_10I05	uncultured bacterium HF0010_10I05	uncultured bacterium HF0010_10I05	0.288332	5	Cluster 1	Yes
bASV8497	Bacteria	Deltaproteobacteria	SAR324 clade(Marine group B)	uncultured bacterium HF0010_10I05	uncultured bacterium HF0010_10I05	uncultured bacterium HF0010_10I05	0.216058	3	Cluster 2	Yes
bASV8499	Bacteria	Deltaproteobacteria	SAR324 clade(Marine group B)	uncultured bacterium HF0010_10I05	uncultured bacterium HF0010_10I05	uncultured bacterium HF0010_10I05	0.217647	3	Cluster 2	No
bASV8504	Bacteria	Deltaproteobacteria	SAR324 clade(Marine group B)	uncultured bacterium HF0010_10I05	uncultured bacterium HF0010_10I05	uncultured bacterium HF0010_10I05	0.297809	6	Cluster 1	No
bASV8507	Bacteria	Deltaproteobacteria	SAR324 clade(Marine group B)	uncultured bacterium HF0010_10I05	uncultured bacterium HF0010_10I05	uncultured bacterium HF0010_10I05	0.288889	5	Cluster 1	Yes
bASV8507	Bacteria	Deltaproteobacteria	SAR324 clade(Marine group B)	uncultured bacterium HF0010_10I05	uncultured bacterium HF0010_10I05	uncultured bacterium HF0010_10I05	0.2263	3	Cluster 2	Yes
bASV9575	Bacteria	Acidimicrobiia	Microtrichales	Ilumatobacteraceae	uncultured	uncultured marine bacterium	0.17983	1	Cluster 2	No
bASV9580	Bacteria	Acidimicrobiia	Microtrichales	Ilumatobacteraceae	uncultured	uncultured marine bacterium	0.235669	2	Cluster 2	No
bASV9582	Bacteria	Acidimicrobiia	Microtrichales	Ilumatobacteraceae	uncultured	uncultured marine bacterium	0.210826	2	Cluster 2	No
bASV9678	Bacteria	Actinobacteria	Micrococcales	Microbacteriaceae	Candidatus Aquiluna	Unassigned Candidatus Aquiluna (Genus)	0.30793	7	Cluster 1	No
bASV9681	Bacteria	Actinobacteria	Micrococcales	Microbacteriaceae	Candidatus Aquiluna	uncultured bacterium	0.259549	3	Cluster 1	Yes
bASV9681	Bacteria	Actinobacteria	Micrococcales	Microbacteriaceae	Candidatus Aquiluna	uncultured bacterium	0.221889	2	Cluster 2	Yes
bASV9684	Bacteria	Actinobacteria	Micrococcales	Microbacteriaceae	Candidatus Aquiluna	uncultured bacterium	0.269127	2	Cluster 1	No
bASV9685	Bacteria	Actinobacteria	Micrococcales	Microbacteriaceae	Candidatus Aquiluna	uncultured bacterium	0.306667	7	Cluster 1	No
bASV9689	Bacteria	Actinobacteria	Micrococcales	Microbacteriaceae	Candidatus Aquiluna	uncultured bacterium	0.295163	7	Cluster 1	No
bASV9693	Bacteria	Actinobacteria	Micrococcales	Microbacteriaceae	Candidatus Aquiluna	uncultured bacterium	0.27381	5	Cluster 1	No
bASV9706	Bacteria	Actinobacteria	Micrococcales	Microbacteriaceae	Unassigned Microbacteriaceae (Family)	Unassigned Microbacteriaceae (Family)	0.291992	5	Cluster 1	No
bASV9724	Bacteria	Actinobacteria	Micrococcales	Microbacteriaceae	Unassigned Microbacteriaceae (Family)	Unassigned Microbacteriaceae (Family)	0.296333	5	Cluster 1	No
bASV9819	Bacteria	Acidimicrobiia	Actinomarinales	Actinomarinaceae	Candidatus Actinomarina	Unassigned Candidatus Actinomarina (Genus)	0.218612	4	Cluster 2	No
bASV9820	Bacteria	Acidimicrobiia	Actinomarinales	Actinomarinaceae	Candidatus Actinomarina	Unassigned Candidatus Actinomarina (Genus)	0.314737	7	Cluster 1	Yes
bASV9820	Bacteria	Acidimicrobiia	Actinomarinales	Actinomarinaceae	Candidatus Actinomarina	Unassigned Candidatus Actinomarina (Genus)	0.241239	5	Cluster 2	Yes
bASV9821	Bacteria	Acidimicrobiia	Actinomarinales	Actinomarinaceae	Candidatus Actinomarina	Unassigned Candidatus Actinomarina (Genus)	0.198391	2	Cluster 2	No
bASV9822	Bacteria	Acidimicrobiia	Actinomarinales	Actinomarinaceae	Candidatus Actinomarina	Unassigned Candidatus Actinomarina (Genus)	0.233071	8	Cluster 2	No
bASV9823	Bacteria	Acidimicrobiia	Actinomarinales	Actinomarinaceae	Candidatus Actinomarina	Unassigned Candidatus Actinomarina (Genus)	0.301411	6	Cluster 1	Yes
bASV9823	Bacteria	Acidimicrobiia	Actinomarinales	Actinomarinaceae	Candidatus Actinomarina	Unassigned Candidatus Actinomarina (Genus)	0.259194	6	Cluster 2	Yes
bASV9824	Bacteria	Acidimicrobiia	Actinomarinales	Actinomarinaceae	Candidatus Actinomarina	Unassigned Candidatus Actinomarina (Genus)	0.195767	1	Cluster 2	No
bASV9829	Bacteria	Acidimicrobiia	Actinomarinales	Actinomarinaceae	Candidatus Actinomarina	Unassigned Candidatus Actinomarina (Genus)	0.260453	3	Cluster 1	Yes
bASV9829	Bacteria	Acidimicrobiia	Actinomarinales	Actinomarinaceae	Candidatus Actinomarina	Unassigned Candidatus Actinomarina (Genus)	0.243221	6	Cluster 2	Yes
bASV9830	Bacteria	Acidimicrobiia	Actinomarinales	Actinomarinaceae	Candidatus Actinomarina	Unassigned Candidatus Actinomarina (Genus)	0.334078	9	Cluster 1	Yes
bASV9830	Bacteria	Acidimicrobiia	Actinomarinales	Actinomarinaceae	Candidatus Actinomarina	Unassigned Candidatus Actinomarina (Genus)	0.205985	1	Cluster 2	Yes
bASV9839	Bacteria	Acidimicrobiia	Actinomarinales	Actinomarinaceae	Candidatus Actinomarina	uncultured actinobacterium	0.29604	6	Cluster 1	Yes
bASV9839	Bacteria	Acidimicrobiia	Actinomarinales	Actinomarinaceae	Candidatus Actinomarina	uncultured actinobacterium	0.206704	2	Cluster 2	Yes
bASV9850	Bacteria	Acidimicrobiia	Actinomarinales	Actinomarinaceae	Candidatus Actinomarina	uncultured actinobacterium	0.283681	5	Cluster 1	Yes
bASV9850	Bacteria	Acidimicrobiia	Actinomarinales	Actinomarinaceae	Candidatus Actinomarina	uncultured actinobacterium	0.190231	2	Cluster 2	Yes
bASV9852	Bacteria	Acidimicrobiia	Actinomarinales	Actinomarinaceae	Candidatus Actinomarina	uncultured actinobacterium	0.315734	8	Cluster 1	Yes
bASV9852	Bacteria	Acidimicrobiia	Actinomarinales	Actinomarinaceae	Candidatus Actinomarina	uncultured actinobacterium	0.238325	2	Cluster 2	Yes
bASV9862	Bacteria	Acidimicrobiia	Actinomarinales	Actinomarinaceae	Candidatus Actinomarina	Unassigned Candidatus Actinomarina (Genus)	0.217487	2	Cluster 2	No
bASV9872	Bacteria	Acidimicrobiia	Actinomarinales	Actinomarinaceae	Candidatus Actinomarina	Unassigned Candidatus Actinomarina (Genus)	0.220566	2	Cluster 2	No
bASV9873	Bacteria	Acidimicrobiia	Actinomarinales	Actinomarinaceae	Candidatus Actinomarina	Unassigned Candidatus Actinomarina (Genus)	0.249158	5	Cluster 2	No
bASV9874	Bacteria	Acidimicrobiia	Actinomarinales	Actinomarinaceae	Candidatus Actinomarina	Unassigned Candidatus Actinomarina (Genus)	0.311458	7	Cluster 1	Yes
bASV9874	Bacteria	Acidimicrobiia	Actinomarinales	Actinomarinaceae	Candidatus Actinomarina	Unassigned Candidatus Actinomarina (Genus)	0.205841	3	Cluster 2	Yes
bASV9880	Bacteria	Acidimicrobiia	Actinomarinales	Actinomarinaceae	Candidatus Actinomarina	Unassigned Candidatus Actinomarina (Genus)	0.296627	7	Cluster 1	Yes
bASV9880	Bacteria	Acidimicrobiia	Actinomarinales	Actinomarinaceae	Candidatus Actinomarina	Unassigned Candidatus Actinomarina (Genus)	0.177992	2	Cluster 2	Yes

## Sheet: Net Comp
Order	Cluster 1	Cluster 2	Overlap
Actinomarinales	9	16	Shared
Bacillariophyta_X	36	40	Shared
Betaproteobacteriales	9	11	Shared
Cellvibrionales	5	2	Shared
Choreotrichida	7	4	Shared
CONThreeP_X	1	2	Shared
Cryomonadida	3	1	Shared
Cryptomonadales	10	11	Shared
Dino-Group-I	3	6	Shared
Dino-Group-II	5	13	Shared
Dino-Group-III	1	1	Shared
Filosa-Imbricatea_X	3	1	Shared
Flavobacteriales	26	19	Shared
Gonyaulacales	1	5	Shared
Gymnodiniales	10	6	Shared
Katablepharidales	2	2	Shared
Mamiellales	10	4	Shared
Marine Group II	4	1	Shared
Marsupiomonadales	1	1	Shared
MAST-6_X	4	2	Shared
Oceanospirillales	6	2	Shared
Opitutales	1	1	Shared
Peridiniales	9	6	Shared
Picozoa_XX	1	2	Shared
Puniceispirillales	12	5	Shared
Pyramimonadales_X	2	1	Shared
Rhodobacterales	18	7	Shared
Rhodospirillales	2	4	Shared
SAR11 clade	23	36	Shared
SAR324 clade(Marine group B)	4	4	Shared
SAR86 clade	14	10	Shared
Strombidiida	10	6	Shared
Thiomicrospirales	6	7	Shared
Tintinnida	5	8	Shared
Unassigned Dinophyceae (Class)	6	15	Shared
Unassigned Fungi (Division)	2	3	Shared
Unassigned Spirotrichea (Class)	1	1	Shared
Arthracanthida-Symphyacanthida	1	0	Cluster 1 only
Colpodellida	1	0	Cluster 1 only
Ebriida	4	0	Cluster 1 only
Fungi_XX	1	0	Cluster 1 only
MAST-12A	1	0	Cluster 1 only
MAST-1C	1	0	Cluster 1 only
Micrococcales	8	0	Cluster 1 only
Nephroselmidales	1	0	Cluster 1 only
OM182 clade	1	0	Cluster 1 only
Prymnesiales	2	0	Cluster 1 only
Sphingobacteriales	2	0	Cluster 1 only
Strombidiida_B	1	0	Cluster 1 only
Suessiales	2	0	Cluster 1 only
Telonemia_XX	2	0	Cluster 1 only
Acantharea_X	0	1	Cluster 2 only
Bicoecales	0	1	Cluster 2 only
Chitinophagales	0	2	Cluster 2 only
Chlorellales	0	1	Cluster 2 only
Cyrtophoria_1	0	1	Cluster 2 only
Dinophyceae_X	0	3	Cluster 2 only
Eukaryota_XXXX	0	2	Cluster 2 only
Microtrichales	0	4	Cluster 2 only
Nitrosopumilales	0	6	Cluster 2 only
Parvibaculales	0	1	Cluster 2 only
Planctomycetales	0	1	Cluster 2 only
Synechococcales	0	5	Cluster 2 only
Thiotrichales	0	1	Cluster 2 only
UBA10353 marine group	0	1	Cluster 2 only
unidentified marine bacterioplankton	0	1	Cluster 2 only
