# Supplementary material for: Estuarine microbial networks and relationships vary between environmentally distinct communities
Source: PeerJ. 2022 Sep 20;10:e14005. doi: 10.7717/peerj.14005 (PMC9504456; doi:10.7717/peerj.14005)
Supplement: Supplemental Information 4 — Information for all ASV-ASV edges inferred via Cluster 1 and 2 networks (separate sheet per cluster). Edge information for each pairing (ASV 1 and ASV 2) includes taxonomy (Domain, Class-Species), edge weight, relationship sign (negative or positive), and type (e.g., Prokaryote-Protist or Protist-Protist). All edges were significant. Taxonomic levels that were similar between each marker region are shown, though we acknowledge different ranks between databases (e.g., SILVA Class = Rank 3 vs. PR2 Class = Rank 4). See Table S1 for full taxonomic assignments and ranks of all ASVs, including those used in the network. [file peerj-10-14005-s004.xlsx]

## Sheet: Cluster 1
ASV 1	Domain 1	Class 1	Order 1	Family 1	Genus 1	Species 1	ASV 2	Domain 2	Class 2	Order 2	Family 2	Genus 2	Species 2	Weight	Sign	Type
bASV10282	Bacteria	Verrucomicrobiae	Opitutales	Puniceicoccaceae	MB11C04 marine group	uncultured marine bacterium	bASV6225	Bacteria	Bacteroidia	Flavobacteriales	Flavobacteriaceae	NS5 marine group	uncultured Bacteroidetes bacterium	0.015653	Pos	Prokaryote-Prokaryote
bASV10282	Bacteria	Verrucomicrobiae	Opitutales	Puniceicoccaceae	MB11C04 marine group	uncultured marine bacterium	bASV7030	Bacteria	Bacteroidia	Flavobacteriales	Flavobacteriaceae	uncultured	marine metagenome	0.272776	Pos	Prokaryote-Prokaryote
bASV10282	Bacteria	Verrucomicrobiae	Opitutales	Puniceicoccaceae	MB11C04 marine group	uncultured marine bacterium	bASV5899	Bacteria	Bacteroidia	Flavobacteriales	Cryomorphaceae	uncultured	Unassigned uncultured (Genus)	-0.000456273	Neg	Prokaryote-Prokaryote
bASV10806	Bacteria	Alphaproteobacteria	Puniceispirillales	SAR116 clade	Unassigned SAR116 clade (Family)	Unassigned SAR116 clade (Family)	bASV6225	Bacteria	Bacteroidia	Flavobacteriales	Flavobacteriaceae	NS5 marine group	uncultured Bacteroidetes bacterium	0.0610352	Pos	Prokaryote-Prokaryote
bASV10814	Bacteria	Alphaproteobacteria	Puniceispirillales	SAR116 clade	Unassigned SAR116 clade (Family)	Unassigned SAR116 clade (Family)	bASV6842	Bacteria	Bacteroidia	Flavobacteriales	Flavobacteriaceae	NS3a marine group	Unassigned NS3a marine group (Genus)	0.038689	Pos	Prokaryote-Prokaryote
bASV10814	Bacteria	Alphaproteobacteria	Puniceispirillales	SAR116 clade	Unassigned SAR116 clade (Family)	Unassigned SAR116 clade (Family)	bASV8497	Bacteria	Deltaproteobacteria	SAR324 clade(Marine group B)	uncultured bacterium HF0010_10I05	uncultured bacterium HF0010_10I05	uncultured bacterium HF0010_10I05	0.0909536	Pos	Prokaryote-Prokaryote
bASV10814	Bacteria	Alphaproteobacteria	Puniceispirillales	SAR116 clade	Unassigned SAR116 clade (Family)	Unassigned SAR116 clade (Family)	bASV6791	Bacteria	Bacteroidia	Flavobacteriales	Flavobacteriaceae	Aureimarina	Unassigned Aureimarina (Genus)	0.0914555	Pos	Prokaryote-Prokaryote
bASV10814	Bacteria	Alphaproteobacteria	Puniceispirillales	SAR116 clade	Unassigned SAR116 clade (Family)	Unassigned SAR116 clade (Family)	bASV669	Bacteria	Alphaproteobacteria	SAR11 clade	Clade I	Clade Ia	Unassigned Clade Ia (Genus)	0.0476364	Pos	Prokaryote-Prokaryote
bASV10826	Bacteria	Alphaproteobacteria	Puniceispirillales	SAR116 clade	Unassigned SAR116 clade (Family)	Unassigned SAR116 clade (Family)	bASV8507	Bacteria	Deltaproteobacteria	SAR324 clade(Marine group B)	uncultured bacterium HF0010_10I05	uncultured bacterium HF0010_10I05	uncultured bacterium HF0010_10I05	0.146096	Pos	Prokaryote-Prokaryote
bASV10989	Bacteria	Alphaproteobacteria	Puniceispirillales	SAR116 clade	Candidatus Puniceispirillum	uncultured bacterium	bASV9820	Bacteria	Acidimicrobiia	Actinomarinales	Actinomarinaceae	Candidatus Actinomarina	Unassigned Candidatus Actinomarina (Genus)	0.0500056	Pos	Prokaryote-Prokaryote
bASV10989	Bacteria	Alphaproteobacteria	Puniceispirillales	SAR116 clade	Candidatus Puniceispirillum	uncultured bacterium	bASV721	Bacteria	Alphaproteobacteria	SAR11 clade	Clade III	Unassigned Clade III (Family)	Unassigned Clade III (Family)	0.105555	Pos	Prokaryote-Prokaryote
bASV10990	Bacteria	Alphaproteobacteria	Puniceispirillales	SAR116 clade	Candidatus Puniceispirillum	uncultured bacterium	bASV675	Bacteria	Alphaproteobacteria	SAR11 clade	Clade I	Clade Ia	Unassigned Clade Ia (Genus)	0.113868	Pos	Prokaryote-Prokaryote
bASV10990	Bacteria	Alphaproteobacteria	Puniceispirillales	SAR116 clade	Candidatus Puniceispirillum	uncultured bacterium	bASV9693	Bacteria	Actinobacteria	Micrococcales	Microbacteriaceae	Candidatus Aquiluna	uncultured bacterium	0.038482	Pos	Prokaryote-Prokaryote
bASV10990	Bacteria	Alphaproteobacteria	Puniceispirillales	SAR116 clade	Candidatus Puniceispirillum	uncultured bacterium	bASV9820	Bacteria	Acidimicrobiia	Actinomarinales	Actinomarinaceae	Candidatus Actinomarina	Unassigned Candidatus Actinomarina (Genus)	0.0896316	Pos	Prokaryote-Prokaryote
bASV11002	Bacteria	Alphaproteobacteria	Puniceispirillales	SAR116 clade	Candidatus Puniceispirillum	uncultured bacterium	bASV6259	Bacteria	Bacteroidia	Flavobacteriales	Flavobacteriaceae	NS5 marine group	Unassigned NS5 marine group (Genus)	-0.00844127	Neg	Prokaryote-Prokaryote
bASV11003	Bacteria	Alphaproteobacteria	Puniceispirillales	SAR116 clade	Candidatus Puniceispirillum	uncultured bacterium	bASV9685	Bacteria	Actinobacteria	Micrococcales	Microbacteriaceae	Candidatus Aquiluna	uncultured bacterium	0.0234549	Pos	Prokaryote-Prokaryote
bASV11003	Bacteria	Alphaproteobacteria	Puniceispirillales	SAR116 clade	Candidatus Puniceispirillum	uncultured bacterium	bASV657	Bacteria	Alphaproteobacteria	SAR11 clade	Clade I	Clade Ia	Unassigned Clade Ia (Genus)	0.00439588	Pos	Prokaryote-Prokaryote
bASV11003	Bacteria	Alphaproteobacteria	Puniceispirillales	SAR116 clade	Candidatus Puniceispirillum	uncultured bacterium	bASV10990	Bacteria	Alphaproteobacteria	Puniceispirillales	SAR116 clade	Candidatus Puniceispirillum	uncultured bacterium	-0.0036159	Neg	Prokaryote-Prokaryote
bASV11025	Bacteria	Alphaproteobacteria	Puniceispirillales	SAR116 clade	Candidatus Puniceispirillum	uncultured bacterium	bASV5899	Bacteria	Bacteroidia	Flavobacteriales	Cryomorphaceae	uncultured	Unassigned uncultured (Genus)	0.0256992	Pos	Prokaryote-Prokaryote
bASV11025	Bacteria	Alphaproteobacteria	Puniceispirillales	SAR116 clade	Candidatus Puniceispirillum	uncultured bacterium	bASV657	Bacteria	Alphaproteobacteria	SAR11 clade	Clade I	Clade Ia	Unassigned Clade Ia (Genus)	0.00543019	Pos	Prokaryote-Prokaryote
bASV11025	Bacteria	Alphaproteobacteria	Puniceispirillales	SAR116 clade	Candidatus Puniceispirillum	uncultured bacterium	bASV6842	Bacteria	Bacteroidia	Flavobacteriales	Flavobacteriaceae	NS3a marine group	Unassigned NS3a marine group (Genus)	0.242223	Pos	Prokaryote-Prokaryote
bASV11443	Bacteria	Alphaproteobacteria	Rhodospirillales	AEGEAN-169 marine group	Unassigned AEGEAN-169 marine group (Family)	Unassigned AEGEAN-169 marine group (Family)	bASV6279	Bacteria	Bacteroidia	Flavobacteriales	Flavobacteriaceae	NS5 marine group	uncultured Flavobacterium sp.	0.159343	Pos	Prokaryote-Prokaryote
bASV11443	Bacteria	Alphaproteobacteria	Rhodospirillales	AEGEAN-169 marine group	Unassigned AEGEAN-169 marine group (Family)	Unassigned AEGEAN-169 marine group (Family)	bASV545	Bacteria	Alphaproteobacteria	SAR11 clade	Clade II	Unassigned Clade II (Family)	Unassigned Clade II (Family)	0.0427748	Pos	Prokaryote-Prokaryote
bASV11443	Bacteria	Alphaproteobacteria	Rhodospirillales	AEGEAN-169 marine group	Unassigned AEGEAN-169 marine group (Family)	Unassigned AEGEAN-169 marine group (Family)	bASV8504	Bacteria	Deltaproteobacteria	SAR324 clade(Marine group B)	uncultured bacterium HF0010_10I05	uncultured bacterium HF0010_10I05	uncultured bacterium HF0010_10I05	0.142701	Pos	Prokaryote-Prokaryote
bASV11464	Bacteria	Alphaproteobacteria	Rhodospirillales	AEGEAN-169 marine group	Unassigned AEGEAN-169 marine group (Family)	Unassigned AEGEAN-169 marine group (Family)	bASV5901	Bacteria	Bacteroidia	Flavobacteriales	Cryomorphaceae	uncultured	Unassigned uncultured (Genus)	0.19626	Pos	Prokaryote-Prokaryote
bASV11464	Bacteria	Alphaproteobacteria	Rhodospirillales	AEGEAN-169 marine group	Unassigned AEGEAN-169 marine group (Family)	Unassigned AEGEAN-169 marine group (Family)	bASV9874	Bacteria	Acidimicrobiia	Actinomarinales	Actinomarinaceae	Candidatus Actinomarina	Unassigned Candidatus Actinomarina (Genus)	0.164273	Pos	Prokaryote-Prokaryote
bASV11620	Bacteria	Alphaproteobacteria	Rhodobacterales	Rhodobacteraceae	Planktomarina	Unassigned Planktomarina (Genus)	bASV6842	Bacteria	Bacteroidia	Flavobacteriales	Flavobacteriaceae	NS3a marine group	Unassigned NS3a marine group (Genus)	0.0330228	Pos	Prokaryote-Prokaryote
bASV11620	Bacteria	Alphaproteobacteria	Rhodobacterales	Rhodobacteraceae	Planktomarina	Unassigned Planktomarina (Genus)	bASV6201	Bacteria	Bacteroidia	Flavobacteriales	Flavobacteriaceae	NS5 marine group	uncultured Flavobacterium sp.	0.0118994	Pos	Prokaryote-Prokaryote
bASV11620	Bacteria	Alphaproteobacteria	Rhodobacterales	Rhodobacteraceae	Planktomarina	Unassigned Planktomarina (Genus)	bASV10826	Bacteria	Alphaproteobacteria	Puniceispirillales	SAR116 clade	Unassigned SAR116 clade (Family)	Unassigned SAR116 clade (Family)	0.192766	Pos	Prokaryote-Prokaryote
bASV11620	Bacteria	Alphaproteobacteria	Rhodobacterales	Rhodobacteraceae	Planktomarina	Unassigned Planktomarina (Genus)	bASV10990	Bacteria	Alphaproteobacteria	Puniceispirillales	SAR116 clade	Candidatus Puniceispirillum	uncultured bacterium	0.0875202	Pos	Prokaryote-Prokaryote
bASV11620	Bacteria	Alphaproteobacteria	Rhodobacterales	Rhodobacteraceae	Planktomarina	Unassigned Planktomarina (Genus)	bASV644	Bacteria	Alphaproteobacteria	SAR11 clade	Clade I	Clade Ia	Unassigned Clade Ia (Genus)	0.0605006	Pos	Prokaryote-Prokaryote
bASV11621	Bacteria	Alphaproteobacteria	Rhodobacterales	Rhodobacteraceae	Planktomarina	Unassigned Planktomarina (Genus)	bASV721	Bacteria	Alphaproteobacteria	SAR11 clade	Clade III	Unassigned Clade III (Family)	Unassigned Clade III (Family)	0.0385473	Pos	Prokaryote-Prokaryote
bASV11621	Bacteria	Alphaproteobacteria	Rhodobacterales	Rhodobacteraceae	Planktomarina	Unassigned Planktomarina (Genus)	bASV11620	Bacteria	Alphaproteobacteria	Rhodobacterales	Rhodobacteraceae	Planktomarina	Unassigned Planktomarina (Genus)	-0.0660688	Neg	Prokaryote-Prokaryote
bASV11621	Bacteria	Alphaproteobacteria	Rhodobacterales	Rhodobacteraceae	Planktomarina	Unassigned Planktomarina (Genus)	bASV7135	Bacteria	Bacteroidia	Flavobacteriales	Flavobacteriaceae	uncultured	Flavobacteriaceae bacterium LE20	0.103814	Pos	Prokaryote-Prokaryote
bASV11626	Bacteria	Alphaproteobacteria	Rhodobacterales	Rhodobacteraceae	Lentibacter	uncultured bacterium	bASV6638	Bacteria	Bacteroidia	Flavobacteriales	Flavobacteriaceae	Formosa	Unassigned Formosa (Genus)	0.0492219	Pos	Prokaryote-Prokaryote
bASV11626	Bacteria	Alphaproteobacteria	Rhodobacterales	Rhodobacteraceae	Lentibacter	uncultured bacterium	bASV10989	Bacteria	Alphaproteobacteria	Puniceispirillales	SAR116 clade	Candidatus Puniceispirillum	uncultured bacterium	0.0134207	Pos	Prokaryote-Prokaryote
bASV11626	Bacteria	Alphaproteobacteria	Rhodobacterales	Rhodobacteraceae	Lentibacter	uncultured bacterium	bASV9693	Bacteria	Actinobacteria	Micrococcales	Microbacteriaceae	Candidatus Aquiluna	uncultured bacterium	0.186952	Pos	Prokaryote-Prokaryote
bASV11627	Bacteria	Alphaproteobacteria	Rhodobacterales	Rhodobacteraceae	Lentibacter	uncultured bacterium	bASV6201	Bacteria	Bacteroidia	Flavobacteriales	Flavobacteriaceae	NS5 marine group	uncultured Flavobacterium sp.	0.0127156	Pos	Prokaryote-Prokaryote
bASV11627	Bacteria	Alphaproteobacteria	Rhodobacterales	Rhodobacteraceae	Lentibacter	uncultured bacterium	bASV6791	Bacteria	Bacteroidia	Flavobacteriales	Flavobacteriaceae	Aureimarina	Unassigned Aureimarina (Genus)	0.0562311	Pos	Prokaryote-Prokaryote
bASV11664	Bacteria	Alphaproteobacteria	Rhodobacterales	Rhodobacteraceae	Litorimicrobium	uncultured alpha proteobacterium	bASV643	Bacteria	Alphaproteobacteria	SAR11 clade	Clade I	Clade Ia	Unassigned Clade Ia (Genus)	0.0208223	Pos	Prokaryote-Prokaryote
bASV11669	Bacteria	Alphaproteobacteria	Rhodobacterales	Rhodobacteraceae	Litorimicrobium	uncultured alpha proteobacterium	bASV6791	Bacteria	Bacteroidia	Flavobacteriales	Flavobacteriaceae	Aureimarina	Unassigned Aureimarina (Genus)	0.117938	Pos	Prokaryote-Prokaryote
bASV11669	Bacteria	Alphaproteobacteria	Rhodobacterales	Rhodobacteraceae	Litorimicrobium	uncultured alpha proteobacterium	bASV11664	Bacteria	Alphaproteobacteria	Rhodobacterales	Rhodobacteraceae	Litorimicrobium	uncultured alpha proteobacterium	-0.130553	Neg	Prokaryote-Prokaryote
bASV11669	Bacteria	Alphaproteobacteria	Rhodobacterales	Rhodobacteraceae	Litorimicrobium	uncultured alpha proteobacterium	bASV5016	Bacteria	Bacteroidia	Sphingobacteriales	NS11-12 marine group	uncultured Bacteroidetes bacterium	uncultured Bacteroidetes bacterium	0.0554712	Pos	Prokaryote-Prokaryote
bASV11669	Bacteria	Alphaproteobacteria	Rhodobacterales	Rhodobacteraceae	Litorimicrobium	uncultured alpha proteobacterium	bASV6841	Bacteria	Bacteroidia	Flavobacteriales	Flavobacteriaceae	NS3a marine group	Unassigned NS3a marine group (Genus)	0.0119802	Pos	Prokaryote-Prokaryote
bASV11681	Bacteria	Alphaproteobacteria	Rhodobacterales	Rhodobacteraceae	Unassigned Rhodobacteraceae (Family)	Unassigned Rhodobacteraceae (Family)	bASV653	Bacteria	Alphaproteobacteria	SAR11 clade	Clade I	Clade Ia	Unassigned Clade Ia (Genus)	0.112258	Pos	Prokaryote-Prokaryote
bASV11681	Bacteria	Alphaproteobacteria	Rhodobacterales	Rhodobacteraceae	Unassigned Rhodobacteraceae (Family)	Unassigned Rhodobacteraceae (Family)	bASV680	Bacteria	Alphaproteobacteria	SAR11 clade	Clade I	Clade Ia	Unassigned Clade Ia (Genus)	-0.108843	Neg	Prokaryote-Prokaryote
bASV11681	Bacteria	Alphaproteobacteria	Rhodobacterales	Rhodobacteraceae	Unassigned Rhodobacteraceae (Family)	Unassigned Rhodobacteraceae (Family)	bASV647	Bacteria	Alphaproteobacteria	SAR11 clade	Clade I	Clade Ia	Unassigned Clade Ia (Genus)	-0.0335565	Neg	Prokaryote-Prokaryote
bASV11691	Bacteria	Alphaproteobacteria	Rhodobacterales	Rhodobacteraceae	Unassigned Rhodobacteraceae (Family)	Unassigned Rhodobacteraceae (Family)	bASV9678	Bacteria	Actinobacteria	Micrococcales	Microbacteriaceae	Candidatus Aquiluna	Unassigned Candidatus Aquiluna (Genus)	0.0964192	Pos	Prokaryote-Prokaryote
bASV11691	Bacteria	Alphaproteobacteria	Rhodobacterales	Rhodobacteraceae	Unassigned Rhodobacteraceae (Family)	Unassigned Rhodobacteraceae (Family)	bASV6259	Bacteria	Bacteroidia	Flavobacteriales	Flavobacteriaceae	NS5 marine group	Unassigned NS5 marine group (Genus)	-0.0559564	Neg	Prokaryote-Prokaryote
bASV11691	Bacteria	Alphaproteobacteria	Rhodobacterales	Rhodobacteraceae	Unassigned Rhodobacteraceae (Family)	Unassigned Rhodobacteraceae (Family)	bASV11681	Bacteria	Alphaproteobacteria	Rhodobacterales	Rhodobacteraceae	Unassigned Rhodobacteraceae (Family)	Unassigned Rhodobacteraceae (Family)	-0.17632	Neg	Prokaryote-Prokaryote
bASV11694	Bacteria	Alphaproteobacteria	Rhodobacterales	Rhodobacteraceae	Unassigned Rhodobacteraceae (Family)	Unassigned Rhodobacteraceae (Family)	bASV7452	Bacteria	Bacteroidia	Flavobacteriales	Crocinitomicaceae	Crocinitomix	unidentified marine bacterioplankton	0.00658955	Pos	Prokaryote-Prokaryote
bASV11694	Bacteria	Alphaproteobacteria	Rhodobacterales	Rhodobacteraceae	Unassigned Rhodobacteraceae (Family)	Unassigned Rhodobacteraceae (Family)	bASV655	Bacteria	Alphaproteobacteria	SAR11 clade	Clade I	Clade Ia	Unassigned Clade Ia (Genus)	0.0923308	Pos	Prokaryote-Prokaryote
bASV11706	Bacteria	Alphaproteobacteria	Rhodobacterales	Rhodobacteraceae	HIMB11	Unassigned HIMB11 (Genus)	bASV9823	Bacteria	Acidimicrobiia	Actinomarinales	Actinomarinaceae	Candidatus Actinomarina	Unassigned Candidatus Actinomarina (Genus)	0.110775	Pos	Prokaryote-Prokaryote
bASV11708	Bacteria	Alphaproteobacteria	Rhodobacterales	Rhodobacteraceae	HIMB11	Unassigned HIMB11 (Genus)	bASV11706	Bacteria	Alphaproteobacteria	Rhodobacterales	Rhodobacteraceae	HIMB11	Unassigned HIMB11 (Genus)	-0.38759	Neg	Prokaryote-Prokaryote
bASV11708	Bacteria	Alphaproteobacteria	Rhodobacterales	Rhodobacteraceae	HIMB11	Unassigned HIMB11 (Genus)	bASV9830	Bacteria	Acidimicrobiia	Actinomarinales	Actinomarinaceae	Candidatus Actinomarina	Unassigned Candidatus Actinomarina (Genus)	0.044584	Pos	Prokaryote-Prokaryote
bASV11708	Bacteria	Alphaproteobacteria	Rhodobacterales	Rhodobacteraceae	HIMB11	Unassigned HIMB11 (Genus)	bASV9880	Bacteria	Acidimicrobiia	Actinomarinales	Actinomarinaceae	Candidatus Actinomarina	Unassigned Candidatus Actinomarina (Genus)	0.0290414	Pos	Prokaryote-Prokaryote
bASV11855	Bacteria	Alphaproteobacteria	Rhodobacterales	Rhodobacteraceae	Ascidiaceihabitans	Unassigned Ascidiaceihabitans (Genus)	bASV3728	Archaea	Thermoplasmata	Marine Group II	marine metagenome	marine metagenome	marine metagenome	0.0218825	Pos	Prokaryote-Prokaryote
bASV11855	Bacteria	Alphaproteobacteria	Rhodobacterales	Rhodobacteraceae	Ascidiaceihabitans	Unassigned Ascidiaceihabitans (Genus)	bASV655	Bacteria	Alphaproteobacteria	SAR11 clade	Clade I	Clade Ia	Unassigned Clade Ia (Genus)	0.00778135	Pos	Prokaryote-Prokaryote
bASV11855	Bacteria	Alphaproteobacteria	Rhodobacterales	Rhodobacteraceae	Ascidiaceihabitans	Unassigned Ascidiaceihabitans (Genus)	bASV10282	Bacteria	Verrucomicrobiae	Opitutales	Puniceicoccaceae	MB11C04 marine group	uncultured marine bacterium	0.112085	Pos	Prokaryote-Prokaryote
bASV11855	Bacteria	Alphaproteobacteria	Rhodobacterales	Rhodobacteraceae	Ascidiaceihabitans	Unassigned Ascidiaceihabitans (Genus)	bASV6192	Bacteria	Bacteroidia	Flavobacteriales	Flavobacteriaceae	NS5 marine group	uncultured Flavobacterium sp.	0.012543	Pos	Prokaryote-Prokaryote
bASV11859	Bacteria	Alphaproteobacteria	Rhodobacterales	Rhodobacteraceae	Ascidiaceihabitans	Unassigned Ascidiaceihabitans (Genus)	bASV5900	Bacteria	Bacteroidia	Flavobacteriales	Cryomorphaceae	uncultured	Unassigned uncultured (Genus)	0.161664	Pos	Prokaryote-Prokaryote
bASV11859	Bacteria	Alphaproteobacteria	Rhodobacterales	Rhodobacteraceae	Ascidiaceihabitans	Unassigned Ascidiaceihabitans (Genus)	bASV11855	Bacteria	Alphaproteobacteria	Rhodobacterales	Rhodobacteraceae	Ascidiaceihabitans	Unassigned Ascidiaceihabitans (Genus)	-8.40834e-05	Neg	Prokaryote-Prokaryote
bASV11859	Bacteria	Alphaproteobacteria	Rhodobacterales	Rhodobacteraceae	Ascidiaceihabitans	Unassigned Ascidiaceihabitans (Genus)	bASV6546	Bacteria	Bacteroidia	Flavobacteriales	Flavobacteriaceae	NS4 marine group	Unassigned NS4 marine group (Genus)	0.00676159	Pos	Prokaryote-Prokaryote
bASV11859	Bacteria	Alphaproteobacteria	Rhodobacterales	Rhodobacteraceae	Ascidiaceihabitans	Unassigned Ascidiaceihabitans (Genus)	bASV644	Bacteria	Alphaproteobacteria	SAR11 clade	Clade I	Clade Ia	Unassigned Clade Ia (Genus)	0.00278171	Pos	Prokaryote-Prokaryote
bASV11860	Bacteria	Alphaproteobacteria	Rhodobacterales	Rhodobacteraceae	Ascidiaceihabitans	Unassigned Ascidiaceihabitans (Genus)	bASV680	Bacteria	Alphaproteobacteria	SAR11 clade	Clade I	Clade Ia	Unassigned Clade Ia (Genus)	0.0426331	Pos	Prokaryote-Prokaryote
bASV11860	Bacteria	Alphaproteobacteria	Rhodobacterales	Rhodobacteraceae	Ascidiaceihabitans	Unassigned Ascidiaceihabitans (Genus)	bASV3708	Archaea	Thermoplasmata	Marine Group II	marine metagenome	marine metagenome	marine metagenome	0.129844	Pos	Prokaryote-Prokaryote
bASV11860	Bacteria	Alphaproteobacteria	Rhodobacterales	Rhodobacteraceae	Ascidiaceihabitans	Unassigned Ascidiaceihabitans (Genus)	bASV9678	Bacteria	Actinobacteria	Micrococcales	Microbacteriaceae	Candidatus Aquiluna	Unassigned Candidatus Aquiluna (Genus)	0.0147638	Pos	Prokaryote-Prokaryote
bASV11873	Bacteria	Alphaproteobacteria	Rhodobacterales	Rhodobacteraceae	Unassigned Rhodobacteraceae (Family)	Unassigned Rhodobacteraceae (Family)	bASV3728	Archaea	Thermoplasmata	Marine Group II	marine metagenome	marine metagenome	marine metagenome	0.195528	Pos	Prokaryote-Prokaryote
bASV11873	Bacteria	Alphaproteobacteria	Rhodobacterales	Rhodobacteraceae	Unassigned Rhodobacteraceae (Family)	Unassigned Rhodobacteraceae (Family)	bASV11872	Bacteria	Alphaproteobacteria	Rhodobacterales	Rhodobacteraceae	Unassigned Rhodobacteraceae (Family)	Unassigned Rhodobacteraceae (Family)	-0.257786	Neg	Prokaryote-Prokaryote
bASV11873	Bacteria	Alphaproteobacteria	Rhodobacterales	Rhodobacteraceae	Unassigned Rhodobacteraceae (Family)	Unassigned Rhodobacteraceae (Family)	bASV5903	Bacteria	Bacteroidia	Flavobacteriales	Cryomorphaceae	uncultured	Unassigned uncultured (Genus)	0.0208832	Pos	Prokaryote-Prokaryote
bASV11905	Bacteria	Alphaproteobacteria	Rhodobacterales	Rhodobacteraceae	Unassigned Rhodobacteraceae (Family)	Unassigned Rhodobacteraceae (Family)	bASV11669	Bacteria	Alphaproteobacteria	Rhodobacterales	Rhodobacteraceae	Litorimicrobium	uncultured alpha proteobacterium	0.0417213	Pos	Prokaryote-Prokaryote
bASV11905	Bacteria	Alphaproteobacteria	Rhodobacterales	Rhodobacteraceae	Unassigned Rhodobacteraceae (Family)	Unassigned Rhodobacteraceae (Family)	bASV11691	Bacteria	Alphaproteobacteria	Rhodobacterales	Rhodobacteraceae	Unassigned Rhodobacteraceae (Family)	Unassigned Rhodobacteraceae (Family)	-0.00773857	Neg	Prokaryote-Prokaryote
bASV11905	Bacteria	Alphaproteobacteria	Rhodobacterales	Rhodobacteraceae	Unassigned Rhodobacteraceae (Family)	Unassigned Rhodobacteraceae (Family)	bASV5906	Bacteria	Bacteroidia	Flavobacteriales	Cryomorphaceae	uncultured	Unassigned uncultured (Genus)	0.00733673	Pos	Prokaryote-Prokaryote
bASV11905	Bacteria	Alphaproteobacteria	Rhodobacterales	Rhodobacteraceae	Unassigned Rhodobacteraceae (Family)	Unassigned Rhodobacteraceae (Family)	bASV11694	Bacteria	Alphaproteobacteria	Rhodobacterales	Rhodobacteraceae	Unassigned Rhodobacteraceae (Family)	Unassigned Rhodobacteraceae (Family)	0.0702851	Pos	Prokaryote-Prokaryote
bASV11905	Bacteria	Alphaproteobacteria	Rhodobacterales	Rhodobacteraceae	Unassigned Rhodobacteraceae (Family)	Unassigned Rhodobacteraceae (Family)	bASV5016	Bacteria	Bacteroidia	Sphingobacteriales	NS11-12 marine group	uncultured Bacteroidetes bacterium	uncultured Bacteroidetes bacterium	0.101176	Pos	Prokaryote-Prokaryote
bASV11905	Bacteria	Alphaproteobacteria	Rhodobacterales	Rhodobacteraceae	Unassigned Rhodobacteraceae (Family)	Unassigned Rhodobacteraceae (Family)	bASV10282	Bacteria	Verrucomicrobiae	Opitutales	Puniceicoccaceae	MB11C04 marine group	uncultured marine bacterium	0.020931	Pos	Prokaryote-Prokaryote
bASV11924	Bacteria	Alphaproteobacteria	Rhodobacterales	Rhodobacteraceae	Unassigned Rhodobacteraceae (Family)	Unassigned Rhodobacteraceae (Family)	bASV6477	Bacteria	Bacteroidia	Flavobacteriales	Flavobacteriaceae	NS5 marine group	Unassigned NS5 marine group (Genus)	0.0166504	Pos	Prokaryote-Prokaryote
bASV11924	Bacteria	Alphaproteobacteria	Rhodobacterales	Rhodobacteraceae	Unassigned Rhodobacteraceae (Family)	Unassigned Rhodobacteraceae (Family)	bASV5017	Bacteria	Bacteroidia	Sphingobacteriales	NS11-12 marine group	uncultured Bacteroidetes bacterium	uncultured Bacteroidetes bacterium	0.030621	Pos	Prokaryote-Prokaryote
bASV11924	Bacteria	Alphaproteobacteria	Rhodobacterales	Rhodobacteraceae	Unassigned Rhodobacteraceae (Family)	Unassigned Rhodobacteraceae (Family)	bASV9850	Bacteria	Acidimicrobiia	Actinomarinales	Actinomarinaceae	Candidatus Actinomarina	uncultured actinobacterium	0.164167	Pos	Prokaryote-Prokaryote
bASV11924	Bacteria	Alphaproteobacteria	Rhodobacterales	Rhodobacteraceae	Unassigned Rhodobacteraceae (Family)	Unassigned Rhodobacteraceae (Family)	bASV8507	Bacteria	Deltaproteobacteria	SAR324 clade(Marine group B)	uncultured bacterium HF0010_10I05	uncultured bacterium HF0010_10I05	uncultured bacterium HF0010_10I05	0.0682548	Pos	Prokaryote-Prokaryote
bASV12437	Bacteria	Alphaproteobacteria	Puniceispirillales	uncultured	Unassigned uncultured (Family)	Unassigned uncultured (Family)	bASV674	Bacteria	Alphaproteobacteria	SAR11 clade	Clade I	Clade Ia	Unassigned Clade Ia (Genus)	0.104467	Pos	Prokaryote-Prokaryote
bASV12437	Bacteria	Alphaproteobacteria	Puniceispirillales	uncultured	Unassigned uncultured (Family)	Unassigned uncultured (Family)	bASV11708	Bacteria	Alphaproteobacteria	Rhodobacterales	Rhodobacteraceae	HIMB11	Unassigned HIMB11 (Genus)	0.0270429	Pos	Prokaryote-Prokaryote
bASV12437	Bacteria	Alphaproteobacteria	Puniceispirillales	uncultured	Unassigned uncultured (Family)	Unassigned uncultured (Family)	bASV9880	Bacteria	Acidimicrobiia	Actinomarinales	Actinomarinaceae	Candidatus Actinomarina	Unassigned Candidatus Actinomarina (Genus)	0.0399903	Pos	Prokaryote-Prokaryote
bASV12442	Bacteria	Alphaproteobacteria	Puniceispirillales	uncultured	Unassigned uncultured (Family)	Unassigned uncultured (Family)	bASV3706	Archaea	Thermoplasmata	Marine Group II	marine metagenome	marine metagenome	marine metagenome	0.227459	Pos	Prokaryote-Prokaryote
bASV12445	Bacteria	Alphaproteobacteria	Puniceispirillales	uncultured	Unassigned uncultured (Family)	Unassigned uncultured (Family)	bASV3593	Archaea	Thermoplasmata	Marine Group II	uncultured marine archaeon DCM3921	uncultured marine archaeon DCM3921	uncultured marine archaeon DCM3921	0.0743855	Pos	Prokaryote-Prokaryote
bASV12445	Bacteria	Alphaproteobacteria	Puniceispirillales	uncultured	Unassigned uncultured (Family)	Unassigned uncultured (Family)	bASV6201	Bacteria	Bacteroidia	Flavobacteriales	Flavobacteriaceae	NS5 marine group	uncultured Flavobacterium sp.	0.00213809	Pos	Prokaryote-Prokaryote
bASV12447	Bacteria	Alphaproteobacteria	Puniceispirillales	uncultured	Unassigned uncultured (Family)	Unassigned uncultured (Family)	bASV6546	Bacteria	Bacteroidia	Flavobacteriales	Flavobacteriaceae	NS4 marine group	Unassigned NS4 marine group (Genus)	0.137377	Pos	Prokaryote-Prokaryote
bASV12447	Bacteria	Alphaproteobacteria	Puniceispirillales	uncultured	Unassigned uncultured (Family)	Unassigned uncultured (Family)	bASV6477	Bacteria	Bacteroidia	Flavobacteriales	Flavobacteriaceae	NS5 marine group	Unassigned NS5 marine group (Genus)	0.0245229	Pos	Prokaryote-Prokaryote
bASV12447	Bacteria	Alphaproteobacteria	Puniceispirillales	uncultured	Unassigned uncultured (Family)	Unassigned uncultured (Family)	bASV6285	Bacteria	Bacteroidia	Flavobacteriales	Flavobacteriaceae	NS5 marine group	uncultured Flavobacterium sp.	-0.0241899	Neg	Prokaryote-Prokaryote
bASV12447	Bacteria	Alphaproteobacteria	Puniceispirillales	uncultured	Unassigned uncultured (Family)	Unassigned uncultured (Family)	bASV661	Bacteria	Alphaproteobacteria	SAR11 clade	Clade I	Clade Ia	Unassigned Clade Ia (Genus)	0.259287	Pos	Prokaryote-Prokaryote
bASV12447	Bacteria	Alphaproteobacteria	Puniceispirillales	uncultured	Unassigned uncultured (Family)	Unassigned uncultured (Family)	bASV8507	Bacteria	Deltaproteobacteria	SAR324 clade(Marine group B)	uncultured bacterium HF0010_10I05	uncultured bacterium HF0010_10I05	uncultured bacterium HF0010_10I05	0.00104338	Pos	Prokaryote-Prokaryote
bASV12447	Bacteria	Alphaproteobacteria	Puniceispirillales	uncultured	Unassigned uncultured (Family)	Unassigned uncultured (Family)	bASV9839	Bacteria	Acidimicrobiia	Actinomarinales	Actinomarinaceae	Candidatus Actinomarina	uncultured actinobacterium	0.0146613	Pos	Prokaryote-Prokaryote
bASV15493	Bacteria	Gammaproteobacteria	Cellvibrionales	Porticoccaceae	SAR92 clade	Unassigned SAR92 clade (Genus)	bASV642	Bacteria	Alphaproteobacteria	SAR11 clade	Clade I	Clade Ia	Unassigned Clade Ia (Genus)	0.0921658	Pos	Prokaryote-Prokaryote
bASV15493	Bacteria	Gammaproteobacteria	Cellvibrionales	Porticoccaceae	SAR92 clade	Unassigned SAR92 clade (Genus)	bASV9724	Bacteria	Actinobacteria	Micrococcales	Microbacteriaceae	Unassigned Microbacteriaceae (Family)	Unassigned Microbacteriaceae (Family)	0.0833604	Pos	Prokaryote-Prokaryote
bASV15493	Bacteria	Gammaproteobacteria	Cellvibrionales	Porticoccaceae	SAR92 clade	Unassigned SAR92 clade (Genus)	bASV669	Bacteria	Alphaproteobacteria	SAR11 clade	Clade I	Clade Ia	Unassigned Clade Ia (Genus)	0.205804	Pos	Prokaryote-Prokaryote
bASV15531	Bacteria	Gammaproteobacteria	Oceanospirillales	Litoricolaceae	Litoricola	uncultured bacterium	bASV11681	Bacteria	Alphaproteobacteria	Rhodobacterales	Rhodobacteraceae	Unassigned Rhodobacteraceae (Family)	Unassigned Rhodobacteraceae (Family)	0.0943668	Pos	Prokaryote-Prokaryote
bASV15531	Bacteria	Gammaproteobacteria	Oceanospirillales	Litoricolaceae	Litoricola	uncultured bacterium	bASV9839	Bacteria	Acidimicrobiia	Actinomarinales	Actinomarinaceae	Candidatus Actinomarina	uncultured actinobacterium	0.160074	Pos	Prokaryote-Prokaryote
bASV15531	Bacteria	Gammaproteobacteria	Oceanospirillales	Litoricolaceae	Litoricola	uncultured bacterium	bASV646	Bacteria	Alphaproteobacteria	SAR11 clade	Clade I	Clade Ia	Unassigned Clade Ia (Genus)	0.0715658	Pos	Prokaryote-Prokaryote
bASV15531	Bacteria	Gammaproteobacteria	Oceanospirillales	Litoricolaceae	Litoricola	uncultured bacterium	bASV9681	Bacteria	Actinobacteria	Micrococcales	Microbacteriaceae	Candidatus Aquiluna	uncultured bacterium	0.170814	Pos	Prokaryote-Prokaryote
bASV15532	Bacteria	Gammaproteobacteria	Oceanospirillales	Litoricolaceae	Litoricola	uncultured bacterium	bASV11873	Bacteria	Alphaproteobacteria	Rhodobacterales	Rhodobacteraceae	Unassigned Rhodobacteraceae (Family)	Unassigned Rhodobacteraceae (Family)	-0.101013	Neg	Prokaryote-Prokaryote
bASV15532	Bacteria	Gammaproteobacteria	Oceanospirillales	Litoricolaceae	Litoricola	uncultured bacterium	bASV5899	Bacteria	Bacteroidia	Flavobacteriales	Cryomorphaceae	uncultured	Unassigned uncultured (Genus)	-0.0634943	Neg	Prokaryote-Prokaryote
bASV15532	Bacteria	Gammaproteobacteria	Oceanospirillales	Litoricolaceae	Litoricola	uncultured bacterium	bASV15531	Bacteria	Gammaproteobacteria	Oceanospirillales	Litoricolaceae	Litoricola	uncultured bacterium	-0.00374136	Neg	Prokaryote-Prokaryote
bASV15537	Bacteria	Gammaproteobacteria	Oceanospirillales	Litoricolaceae	Litoricola	Unassigned Litoricola (Genus)	bASV647	Bacteria	Alphaproteobacteria	SAR11 clade	Clade I	Clade Ia	Unassigned Clade Ia (Genus)	0.0846999	Pos	Prokaryote-Prokaryote
bASV15537	Bacteria	Gammaproteobacteria	Oceanospirillales	Litoricolaceae	Litoricola	Unassigned Litoricola (Genus)	bASV9850	Bacteria	Acidimicrobiia	Actinomarinales	Actinomarinaceae	Candidatus Actinomarina	uncultured actinobacterium	0.229703	Pos	Prokaryote-Prokaryote
bASV15715	Bacteria	Gammaproteobacteria	Thiomicrospirales	Thioglobaceae	SUP05 cluster	uncultured bacterium	bASV8497	Bacteria	Deltaproteobacteria	SAR324 clade(Marine group B)	uncultured bacterium HF0010_10I05	uncultured bacterium HF0010_10I05	uncultured bacterium HF0010_10I05	0.0183815	Pos	Prokaryote-Prokaryote
bASV15715	Bacteria	Gammaproteobacteria	Thiomicrospirales	Thioglobaceae	SUP05 cluster	uncultured bacterium	bASV10814	Bacteria	Alphaproteobacteria	Puniceispirillales	SAR116 clade	Unassigned SAR116 clade (Family)	Unassigned SAR116 clade (Family)	0.0679342	Pos	Prokaryote-Prokaryote
bASV15715	Bacteria	Gammaproteobacteria	Thiomicrospirales	Thioglobaceae	SUP05 cluster	uncultured bacterium	bASV7030	Bacteria	Bacteroidia	Flavobacteriales	Flavobacteriaceae	uncultured	marine metagenome	0.0314868	Pos	Prokaryote-Prokaryote
bASV15715	Bacteria	Gammaproteobacteria	Thiomicrospirales	Thioglobaceae	SUP05 cluster	uncultured bacterium	bASV15537	Bacteria	Gammaproteobacteria	Oceanospirillales	Litoricolaceae	Litoricola	Unassigned Litoricola (Genus)	0.183852	Pos	Prokaryote-Prokaryote
bASV15722	Bacteria	Gammaproteobacteria	Thiomicrospirales	Thioglobaceae	SUP05 cluster	uncultured bacterium	bASV9706	Bacteria	Actinobacteria	Micrococcales	Microbacteriaceae	Unassigned Microbacteriaceae (Family)	Unassigned Microbacteriaceae (Family)	0.0203105	Pos	Prokaryote-Prokaryote
bASV15722	Bacteria	Gammaproteobacteria	Thiomicrospirales	Thioglobaceae	SUP05 cluster	uncultured bacterium	bASV9689	Bacteria	Actinobacteria	Micrococcales	Microbacteriaceae	Candidatus Aquiluna	uncultured bacterium	0.0489761	Pos	Prokaryote-Prokaryote
bASV15724	Bacteria	Gammaproteobacteria	Thiomicrospirales	Thioglobaceae	SUP05 cluster	uncultured bacterium	bASV11464	Bacteria	Alphaproteobacteria	Rhodospirillales	AEGEAN-169 marine group	Unassigned AEGEAN-169 marine group (Family)	Unassigned AEGEAN-169 marine group (Family)	0.18241	Pos	Prokaryote-Prokaryote
bASV15724	Bacteria	Gammaproteobacteria	Thiomicrospirales	Thioglobaceae	SUP05 cluster	uncultured bacterium	bASV3708	Archaea	Thermoplasmata	Marine Group II	marine metagenome	marine metagenome	marine metagenome	0.0997435	Pos	Prokaryote-Prokaryote
bASV15724	Bacteria	Gammaproteobacteria	Thiomicrospirales	Thioglobaceae	SUP05 cluster	uncultured bacterium	bASV12445	Bacteria	Alphaproteobacteria	Puniceispirillales	uncultured	Unassigned uncultured (Family)	Unassigned uncultured (Family)	0.226793	Pos	Prokaryote-Prokaryote
bASV15724	Bacteria	Gammaproteobacteria	Thiomicrospirales	Thioglobaceae	SUP05 cluster	uncultured bacterium	bASV643	Bacteria	Alphaproteobacteria	SAR11 clade	Clade I	Clade Ia	Unassigned Clade Ia (Genus)	0.00205287	Pos	Prokaryote-Prokaryote
bASV15724	Bacteria	Gammaproteobacteria	Thiomicrospirales	Thioglobaceae	SUP05 cluster	uncultured bacterium	bASV6193	Bacteria	Bacteroidia	Flavobacteriales	Flavobacteriaceae	NS5 marine group	uncultured Flavobacterium sp.	0.0466249	Pos	Prokaryote-Prokaryote
bASV15735	Bacteria	Gammaproteobacteria	Thiomicrospirales	Thioglobaceae	SUP05 cluster	uncultured bacterium	bASV655	Bacteria	Alphaproteobacteria	SAR11 clade	Clade I	Clade Ia	Unassigned Clade Ia (Genus)	0.107708	Pos	Prokaryote-Prokaryote
bASV15735	Bacteria	Gammaproteobacteria	Thiomicrospirales	Thioglobaceae	SUP05 cluster	uncultured bacterium	bASV5903	Bacteria	Bacteroidia	Flavobacteriales	Cryomorphaceae	uncultured	Unassigned uncultured (Genus)	0.0268808	Pos	Prokaryote-Prokaryote
bASV15735	Bacteria	Gammaproteobacteria	Thiomicrospirales	Thioglobaceae	SUP05 cluster	uncultured bacterium	bASV650	Bacteria	Alphaproteobacteria	SAR11 clade	Clade I	Clade Ia	Unassigned Clade Ia (Genus)	0.100723	Pos	Prokaryote-Prokaryote
bASV15735	Bacteria	Gammaproteobacteria	Thiomicrospirales	Thioglobaceae	SUP05 cluster	uncultured bacterium	bASV11003	Bacteria	Alphaproteobacteria	Puniceispirillales	SAR116 clade	Candidatus Puniceispirillum	uncultured bacterium	0.0728045	Pos	Prokaryote-Prokaryote
bASV15735	Bacteria	Gammaproteobacteria	Thiomicrospirales	Thioglobaceae	SUP05 cluster	uncultured bacterium	bASV11708	Bacteria	Alphaproteobacteria	Rhodobacterales	Rhodobacteraceae	HIMB11	Unassigned HIMB11 (Genus)	0.0166407	Pos	Prokaryote-Prokaryote
bASV15735	Bacteria	Gammaproteobacteria	Thiomicrospirales	Thioglobaceae	SUP05 cluster	uncultured bacterium	bASV3708	Archaea	Thermoplasmata	Marine Group II	marine metagenome	marine metagenome	marine metagenome	0.0223509	Pos	Prokaryote-Prokaryote
bASV16716	Bacteria	Gammaproteobacteria	SAR86 clade	uncultured gamma proteobacterium	uncultured gamma proteobacterium	uncultured gamma proteobacterium	bASV6201	Bacteria	Bacteroidia	Flavobacteriales	Flavobacteriaceae	NS5 marine group	uncultured Flavobacterium sp.	0.0767676	Pos	Prokaryote-Prokaryote
bASV16716	Bacteria	Gammaproteobacteria	SAR86 clade	uncultured gamma proteobacterium	uncultured gamma proteobacterium	uncultured gamma proteobacterium	bASV5900	Bacteria	Bacteroidia	Flavobacteriales	Cryomorphaceae	uncultured	Unassigned uncultured (Genus)	0.284255	Pos	Prokaryote-Prokaryote
bASV16716	Bacteria	Gammaproteobacteria	SAR86 clade	uncultured gamma proteobacterium	uncultured gamma proteobacterium	uncultured gamma proteobacterium	bASV8494	Bacteria	Deltaproteobacteria	SAR324 clade(Marine group B)	uncultured bacterium HF0010_10I05	uncultured bacterium HF0010_10I05	uncultured bacterium HF0010_10I05	0.0130391	Pos	Prokaryote-Prokaryote
bASV16716	Bacteria	Gammaproteobacteria	SAR86 clade	uncultured gamma proteobacterium	uncultured gamma proteobacterium	uncultured gamma proteobacterium	bASV9850	Bacteria	Acidimicrobiia	Actinomarinales	Actinomarinaceae	Candidatus Actinomarina	uncultured actinobacterium	0.00679503	Pos	Prokaryote-Prokaryote
bASV16716	Bacteria	Gammaproteobacteria	SAR86 clade	uncultured gamma proteobacterium	uncultured gamma proteobacterium	uncultured gamma proteobacterium	bASV12437	Bacteria	Alphaproteobacteria	Puniceispirillales	uncultured	Unassigned uncultured (Family)	Unassigned uncultured (Family)	0.0266375	Pos	Prokaryote-Prokaryote
bASV16716	Bacteria	Gammaproteobacteria	SAR86 clade	uncultured gamma proteobacterium	uncultured gamma proteobacterium	uncultured gamma proteobacterium	bASV9880	Bacteria	Acidimicrobiia	Actinomarinales	Actinomarinaceae	Candidatus Actinomarina	Unassigned Candidatus Actinomarina (Genus)	0.317771	Pos	Prokaryote-Prokaryote
bASV16721	Bacteria	Gammaproteobacteria	SAR86 clade	uncultured gamma proteobacterium	uncultured gamma proteobacterium	uncultured gamma proteobacterium	bASV12447	Bacteria	Alphaproteobacteria	Puniceispirillales	uncultured	Unassigned uncultured (Family)	Unassigned uncultured (Family)	0.143928	Pos	Prokaryote-Prokaryote
bASV16721	Bacteria	Gammaproteobacteria	SAR86 clade	uncultured gamma proteobacterium	uncultured gamma proteobacterium	uncultured gamma proteobacterium	bASV9874	Bacteria	Acidimicrobiia	Actinomarinales	Actinomarinaceae	Candidatus Actinomarina	Unassigned Candidatus Actinomarina (Genus)	0.0959909	Pos	Prokaryote-Prokaryote
bASV16721	Bacteria	Gammaproteobacteria	SAR86 clade	uncultured gamma proteobacterium	uncultured gamma proteobacterium	uncultured gamma proteobacterium	bASV9681	Bacteria	Actinobacteria	Micrococcales	Microbacteriaceae	Candidatus Aquiluna	uncultured bacterium	0.246085	Pos	Prokaryote-Prokaryote
bASV16721	Bacteria	Gammaproteobacteria	SAR86 clade	uncultured gamma proteobacterium	uncultured gamma proteobacterium	uncultured gamma proteobacterium	bASV3593	Archaea	Thermoplasmata	Marine Group II	uncultured marine archaeon DCM3921	uncultured marine archaeon DCM3921	uncultured marine archaeon DCM3921	0.0644392	Pos	Prokaryote-Prokaryote
bASV16721	Bacteria	Gammaproteobacteria	SAR86 clade	uncultured gamma proteobacterium	uncultured gamma proteobacterium	uncultured gamma proteobacterium	bASV15715	Bacteria	Gammaproteobacteria	Thiomicrospirales	Thioglobaceae	SUP05 cluster	uncultured bacterium	0.208886	Pos	Prokaryote-Prokaryote
bASV16734	Bacteria	Gammaproteobacteria	SAR86 clade	Unassigned SAR86 clade (Order)	Unassigned SAR86 clade (Order)	Unassigned SAR86 clade (Order)	bASV11025	Bacteria	Alphaproteobacteria	Puniceispirillales	SAR116 clade	Candidatus Puniceispirillum	uncultured bacterium	0.0415266	Pos	Prokaryote-Prokaryote
bASV16734	Bacteria	Gammaproteobacteria	SAR86 clade	Unassigned SAR86 clade (Order)	Unassigned SAR86 clade (Order)	Unassigned SAR86 clade (Order)	bASV657	Bacteria	Alphaproteobacteria	SAR11 clade	Clade I	Clade Ia	Unassigned Clade Ia (Genus)	0.0664338	Pos	Prokaryote-Prokaryote
bASV16734	Bacteria	Gammaproteobacteria	SAR86 clade	Unassigned SAR86 clade (Order)	Unassigned SAR86 clade (Order)	Unassigned SAR86 clade (Order)	bASV7135	Bacteria	Bacteroidia	Flavobacteriales	Flavobacteriaceae	uncultured	Flavobacteriaceae bacterium LE20	0.093523	Pos	Prokaryote-Prokaryote
bASV16740	Bacteria	Gammaproteobacteria	SAR86 clade	Unassigned SAR86 clade (Order)	Unassigned SAR86 clade (Order)	Unassigned SAR86 clade (Order)	bASV6277	Bacteria	Bacteroidia	Flavobacteriales	Flavobacteriaceae	NS5 marine group	uncultured Flavobacterium sp.	-0.00815314	Neg	Prokaryote-Prokaryote
bASV16740	Bacteria	Gammaproteobacteria	SAR86 clade	Unassigned SAR86 clade (Order)	Unassigned SAR86 clade (Order)	Unassigned SAR86 clade (Order)	bASV9724	Bacteria	Actinobacteria	Micrococcales	Microbacteriaceae	Unassigned Microbacteriaceae (Family)	Unassigned Microbacteriaceae (Family)	0.0137818	Pos	Prokaryote-Prokaryote
bASV16742	Bacteria	Gammaproteobacteria	SAR86 clade	Unassigned SAR86 clade (Order)	Unassigned SAR86 clade (Order)	Unassigned SAR86 clade (Order)	bASV642	Bacteria	Alphaproteobacteria	SAR11 clade	Clade I	Clade Ia	Unassigned Clade Ia (Genus)	0.166121	Pos	Prokaryote-Prokaryote
bASV16742	Bacteria	Gammaproteobacteria	SAR86 clade	Unassigned SAR86 clade (Order)	Unassigned SAR86 clade (Order)	Unassigned SAR86 clade (Order)	bASV9689	Bacteria	Actinobacteria	Micrococcales	Microbacteriaceae	Candidatus Aquiluna	uncultured bacterium	0.0513259	Pos	Prokaryote-Prokaryote
bASV16749	Bacteria	Gammaproteobacteria	SAR86 clade	Unassigned SAR86 clade (Order)	Unassigned SAR86 clade (Order)	Unassigned SAR86 clade (Order)	bASV648	Bacteria	Alphaproteobacteria	SAR11 clade	Clade I	Clade Ia	Unassigned Clade Ia (Genus)	0.206455	Pos	Prokaryote-Prokaryote
bASV16749	Bacteria	Gammaproteobacteria	SAR86 clade	Unassigned SAR86 clade (Order)	Unassigned SAR86 clade (Order)	Unassigned SAR86 clade (Order)	bASV16734	Bacteria	Gammaproteobacteria	SAR86 clade	Unassigned SAR86 clade (Order)	Unassigned SAR86 clade (Order)	Unassigned SAR86 clade (Order)	0.0152328	Pos	Prokaryote-Prokaryote
bASV16759	Bacteria	Gammaproteobacteria	SAR86 clade	Unassigned SAR86 clade (Order)	Unassigned SAR86 clade (Order)	Unassigned SAR86 clade (Order)	bASV669	Bacteria	Alphaproteobacteria	SAR11 clade	Clade I	Clade Ia	Unassigned Clade Ia (Genus)	0.237304	Pos	Prokaryote-Prokaryote
bASV16759	Bacteria	Gammaproteobacteria	SAR86 clade	Unassigned SAR86 clade (Order)	Unassigned SAR86 clade (Order)	Unassigned SAR86 clade (Order)	bASV5901	Bacteria	Bacteroidia	Flavobacteriales	Cryomorphaceae	uncultured	Unassigned uncultured (Genus)	0.0379079	Pos	Prokaryote-Prokaryote
bASV16774	Bacteria	Gammaproteobacteria	SAR86 clade	Unassigned SAR86 clade (Order)	Unassigned SAR86 clade (Order)	Unassigned SAR86 clade (Order)	bASV564	Bacteria	Alphaproteobacteria	SAR11 clade	Clade II	Unassigned Clade II (Family)	Unassigned Clade II (Family)	0.0927728	Pos	Prokaryote-Prokaryote
bASV16774	Bacteria	Gammaproteobacteria	SAR86 clade	Unassigned SAR86 clade (Order)	Unassigned SAR86 clade (Order)	Unassigned SAR86 clade (Order)	bASV10989	Bacteria	Alphaproteobacteria	Puniceispirillales	SAR116 clade	Candidatus Puniceispirillum	uncultured bacterium	0.00704258	Pos	Prokaryote-Prokaryote
bASV16774	Bacteria	Gammaproteobacteria	SAR86 clade	Unassigned SAR86 clade (Order)	Unassigned SAR86 clade (Order)	Unassigned SAR86 clade (Order)	bASV11003	Bacteria	Alphaproteobacteria	Puniceispirillales	SAR116 clade	Candidatus Puniceispirillum	uncultured bacterium	0.0215924	Pos	Prokaryote-Prokaryote
bASV16776	Bacteria	Gammaproteobacteria	SAR86 clade	Unassigned SAR86 clade (Order)	Unassigned SAR86 clade (Order)	Unassigned SAR86 clade (Order)	bASV12442	Bacteria	Alphaproteobacteria	Puniceispirillales	uncultured	Unassigned uncultured (Family)	Unassigned uncultured (Family)	0.239332	Pos	Prokaryote-Prokaryote
bASV16776	Bacteria	Gammaproteobacteria	SAR86 clade	Unassigned SAR86 clade (Order)	Unassigned SAR86 clade (Order)	Unassigned SAR86 clade (Order)	bASV11002	Bacteria	Alphaproteobacteria	Puniceispirillales	SAR116 clade	Candidatus Puniceispirillum	uncultured bacterium	0.0523087	Pos	Prokaryote-Prokaryote
bASV16776	Bacteria	Gammaproteobacteria	SAR86 clade	Unassigned SAR86 clade (Order)	Unassigned SAR86 clade (Order)	Unassigned SAR86 clade (Order)	bASV9681	Bacteria	Actinobacteria	Micrococcales	Microbacteriaceae	Candidatus Aquiluna	uncultured bacterium	0.184669	Pos	Prokaryote-Prokaryote
bASV16777	Bacteria	Gammaproteobacteria	SAR86 clade	Unassigned SAR86 clade (Order)	Unassigned SAR86 clade (Order)	Unassigned SAR86 clade (Order)	bASV15719	Bacteria	Gammaproteobacteria	Thiomicrospirales	Thioglobaceae	SUP05 cluster	uncultured bacterium	0.122235	Pos	Prokaryote-Prokaryote
bASV16777	Bacteria	Gammaproteobacteria	SAR86 clade	Unassigned SAR86 clade (Order)	Unassigned SAR86 clade (Order)	Unassigned SAR86 clade (Order)	bASV6547	Bacteria	Bacteroidia	Flavobacteriales	Flavobacteriaceae	NS4 marine group	Unassigned NS4 marine group (Genus)	0.390093	Pos	Prokaryote-Prokaryote
bASV16777	Bacteria	Gammaproteobacteria	SAR86 clade	Unassigned SAR86 clade (Order)	Unassigned SAR86 clade (Order)	Unassigned SAR86 clade (Order)	bASV3708	Archaea	Thermoplasmata	Marine Group II	marine metagenome	marine metagenome	marine metagenome	0.223788	Pos	Prokaryote-Prokaryote
bASV16780	Bacteria	Gammaproteobacteria	SAR86 clade	Unassigned SAR86 clade (Order)	Unassigned SAR86 clade (Order)	Unassigned SAR86 clade (Order)	bASV8507	Bacteria	Deltaproteobacteria	SAR324 clade(Marine group B)	uncultured bacterium HF0010_10I05	uncultured bacterium HF0010_10I05	uncultured bacterium HF0010_10I05	0.180287	Pos	Prokaryote-Prokaryote
bASV16780	Bacteria	Gammaproteobacteria	SAR86 clade	Unassigned SAR86 clade (Order)	Unassigned SAR86 clade (Order)	Unassigned SAR86 clade (Order)	bASV9724	Bacteria	Actinobacteria	Micrococcales	Microbacteriaceae	Unassigned Microbacteriaceae (Family)	Unassigned Microbacteriaceae (Family)	0.0883015	Pos	Prokaryote-Prokaryote
bASV16780	Bacteria	Gammaproteobacteria	SAR86 clade	Unassigned SAR86 clade (Order)	Unassigned SAR86 clade (Order)	Unassigned SAR86 clade (Order)	bASV15735	Bacteria	Gammaproteobacteria	Thiomicrospirales	Thioglobaceae	SUP05 cluster	uncultured bacterium	0.00882816	Pos	Prokaryote-Prokaryote
bASV16780	Bacteria	Gammaproteobacteria	SAR86 clade	Unassigned SAR86 clade (Order)	Unassigned SAR86 clade (Order)	Unassigned SAR86 clade (Order)	bASV15537	Bacteria	Gammaproteobacteria	Oceanospirillales	Litoricolaceae	Litoricola	Unassigned Litoricola (Genus)	0.191089	Pos	Prokaryote-Prokaryote
bASV16780	Bacteria	Gammaproteobacteria	SAR86 clade	Unassigned SAR86 clade (Order)	Unassigned SAR86 clade (Order)	Unassigned SAR86 clade (Order)	bASV11905	Bacteria	Alphaproteobacteria	Rhodobacterales	Rhodobacteraceae	Unassigned Rhodobacteraceae (Family)	Unassigned Rhodobacteraceae (Family)	0.112954	Pos	Prokaryote-Prokaryote
bASV16780	Bacteria	Gammaproteobacteria	SAR86 clade	Unassigned SAR86 clade (Order)	Unassigned SAR86 clade (Order)	Unassigned SAR86 clade (Order)	bASV6547	Bacteria	Bacteroidia	Flavobacteriales	Flavobacteriaceae	NS4 marine group	Unassigned NS4 marine group (Genus)	0.0415657	Pos	Prokaryote-Prokaryote
bASV16783	Bacteria	Gammaproteobacteria	SAR86 clade	Unassigned SAR86 clade (Order)	Unassigned SAR86 clade (Order)	Unassigned SAR86 clade (Order)	bASV661	Bacteria	Alphaproteobacteria	SAR11 clade	Clade I	Clade Ia	Unassigned Clade Ia (Genus)	0.037707	Pos	Prokaryote-Prokaryote
bASV16783	Bacteria	Gammaproteobacteria	SAR86 clade	Unassigned SAR86 clade (Order)	Unassigned SAR86 clade (Order)	Unassigned SAR86 clade (Order)	bASV3706	Archaea	Thermoplasmata	Marine Group II	marine metagenome	marine metagenome	marine metagenome	0.0521886	Pos	Prokaryote-Prokaryote
bASV16783	Bacteria	Gammaproteobacteria	SAR86 clade	Unassigned SAR86 clade (Order)	Unassigned SAR86 clade (Order)	Unassigned SAR86 clade (Order)	bASV8497	Bacteria	Deltaproteobacteria	SAR324 clade(Marine group B)	uncultured bacterium HF0010_10I05	uncultured bacterium HF0010_10I05	uncultured bacterium HF0010_10I05	0.00230945	Pos	Prokaryote-Prokaryote
bASV16783	Bacteria	Gammaproteobacteria	SAR86 clade	Unassigned SAR86 clade (Order)	Unassigned SAR86 clade (Order)	Unassigned SAR86 clade (Order)	bASV16721	Bacteria	Gammaproteobacteria	SAR86 clade	uncultured gamma proteobacterium	uncultured gamma proteobacterium	uncultured gamma proteobacterium	0.225635	Pos	Prokaryote-Prokaryote
bASV16796	Bacteria	Gammaproteobacteria	SAR86 clade	Unassigned SAR86 clade (Order)	Unassigned SAR86 clade (Order)	Unassigned SAR86 clade (Order)	bASV12447	Bacteria	Alphaproteobacteria	Puniceispirillales	uncultured	Unassigned uncultured (Family)	Unassigned uncultured (Family)	0.0241415	Pos	Prokaryote-Prokaryote
bASV16796	Bacteria	Gammaproteobacteria	SAR86 clade	Unassigned SAR86 clade (Order)	Unassigned SAR86 clade (Order)	Unassigned SAR86 clade (Order)	bASV643	Bacteria	Alphaproteobacteria	SAR11 clade	Clade I	Clade Ia	Unassigned Clade Ia (Genus)	0.137751	Pos	Prokaryote-Prokaryote
bASV16796	Bacteria	Gammaproteobacteria	SAR86 clade	Unassigned SAR86 clade (Order)	Unassigned SAR86 clade (Order)	Unassigned SAR86 clade (Order)	bASV16721	Bacteria	Gammaproteobacteria	SAR86 clade	uncultured gamma proteobacterium	uncultured gamma proteobacterium	uncultured gamma proteobacterium	0.366692	Pos	Prokaryote-Prokaryote
bASV16799	Bacteria	Gammaproteobacteria	SAR86 clade	Unassigned SAR86 clade (Order)	Unassigned SAR86 clade (Order)	Unassigned SAR86 clade (Order)	bASV8494	Bacteria	Deltaproteobacteria	SAR324 clade(Marine group B)	uncultured bacterium HF0010_10I05	uncultured bacterium HF0010_10I05	uncultured bacterium HF0010_10I05	0.0616421	Pos	Prokaryote-Prokaryote
bASV16799	Bacteria	Gammaproteobacteria	SAR86 clade	Unassigned SAR86 clade (Order)	Unassigned SAR86 clade (Order)	Unassigned SAR86 clade (Order)	bASV15735	Bacteria	Gammaproteobacteria	Thiomicrospirales	Thioglobaceae	SUP05 cluster	uncultured bacterium	0.174191	Pos	Prokaryote-Prokaryote
bASV17043	Bacteria	Gammaproteobacteria	Betaproteobacteriales	Burkholderiaceae	RS62 marine group	uncultured bacterium	bASV539	Bacteria	Alphaproteobacteria	SAR11 clade	Clade II	Unassigned Clade II (Family)	Unassigned Clade II (Family)	0.0053846	Pos	Prokaryote-Prokaryote
bASV17043	Bacteria	Gammaproteobacteria	Betaproteobacteriales	Burkholderiaceae	RS62 marine group	uncultured bacterium	bASV5903	Bacteria	Bacteroidia	Flavobacteriales	Cryomorphaceae	uncultured	Unassigned uncultured (Genus)	0.0709236	Pos	Prokaryote-Prokaryote
bASV17044	Bacteria	Gammaproteobacteria	Betaproteobacteriales	Burkholderiaceae	RS62 marine group	uncultured bacterium	bASV9693	Bacteria	Actinobacteria	Micrococcales	Microbacteriaceae	Candidatus Aquiluna	uncultured bacterium	0.115632	Pos	Prokaryote-Prokaryote
bASV17044	Bacteria	Gammaproteobacteria	Betaproteobacteriales	Burkholderiaceae	RS62 marine group	uncultured bacterium	bASV17043	Bacteria	Gammaproteobacteria	Betaproteobacteriales	Burkholderiaceae	RS62 marine group	uncultured bacterium	-0.000756724	Neg	Prokaryote-Prokaryote
bASV17222	Bacteria	Gammaproteobacteria	Betaproteobacteriales	Methylophilaceae	OM43 clade	Unassigned OM43 clade (Genus)	bASV9685	Bacteria	Actinobacteria	Micrococcales	Microbacteriaceae	Candidatus Aquiluna	uncultured bacterium	0.0704776	Pos	Prokaryote-Prokaryote
bASV17222	Bacteria	Gammaproteobacteria	Betaproteobacteriales	Methylophilaceae	OM43 clade	Unassigned OM43 clade (Genus)	bASV6279	Bacteria	Bacteroidia	Flavobacteriales	Flavobacteriaceae	NS5 marine group	uncultured Flavobacterium sp.	0.0997364	Pos	Prokaryote-Prokaryote
bASV17224	Bacteria	Gammaproteobacteria	Betaproteobacteriales	Methylophilaceae	OM43 clade	Unassigned OM43 clade (Genus)	bASV16740	Bacteria	Gammaproteobacteria	SAR86 clade	Unassigned SAR86 clade (Order)	Unassigned SAR86 clade (Order)	Unassigned SAR86 clade (Order)	0.0280354	Pos	Prokaryote-Prokaryote
bASV17224	Bacteria	Gammaproteobacteria	Betaproteobacteriales	Methylophilaceae	OM43 clade	Unassigned OM43 clade (Genus)	bASV9724	Bacteria	Actinobacteria	Micrococcales	Microbacteriaceae	Unassigned Microbacteriaceae (Family)	Unassigned Microbacteriaceae (Family)	0.0416353	Pos	Prokaryote-Prokaryote
bASV17224	Bacteria	Gammaproteobacteria	Betaproteobacteriales	Methylophilaceae	OM43 clade	Unassigned OM43 clade (Genus)	bASV11621	Bacteria	Alphaproteobacteria	Rhodobacterales	Rhodobacteraceae	Planktomarina	Unassigned Planktomarina (Genus)	0.153563	Pos	Prokaryote-Prokaryote
bASV17224	Bacteria	Gammaproteobacteria	Betaproteobacteriales	Methylophilaceae	OM43 clade	Unassigned OM43 clade (Genus)	bASV6204	Bacteria	Bacteroidia	Flavobacteriales	Flavobacteriaceae	NS5 marine group	uncultured Flavobacterium sp.	0.00675728	Pos	Prokaryote-Prokaryote
bASV17230	Bacteria	Gammaproteobacteria	Betaproteobacteriales	Methylophilaceae	OM43 clade	Unassigned OM43 clade (Genus)	bASV652	Bacteria	Alphaproteobacteria	SAR11 clade	Clade I	Clade Ia	Unassigned Clade Ia (Genus)	0.0226649	Pos	Prokaryote-Prokaryote
bASV17230	Bacteria	Gammaproteobacteria	Betaproteobacteriales	Methylophilaceae	OM43 clade	Unassigned OM43 clade (Genus)	bASV17043	Bacteria	Gammaproteobacteria	Betaproteobacteriales	Burkholderiaceae	RS62 marine group	uncultured bacterium	0.240033	Pos	Prokaryote-Prokaryote
bASV17230	Bacteria	Gammaproteobacteria	Betaproteobacteriales	Methylophilaceae	OM43 clade	Unassigned OM43 clade (Genus)	bASV16776	Bacteria	Gammaproteobacteria	SAR86 clade	Unassigned SAR86 clade (Order)	Unassigned SAR86 clade (Order)	Unassigned SAR86 clade (Order)	0.0333091	Pos	Prokaryote-Prokaryote
bASV17230	Bacteria	Gammaproteobacteria	Betaproteobacteriales	Methylophilaceae	OM43 clade	Unassigned OM43 clade (Genus)	bASV9706	Bacteria	Actinobacteria	Micrococcales	Microbacteriaceae	Unassigned Microbacteriaceae (Family)	Unassigned Microbacteriaceae (Family)	0.0670516	Pos	Prokaryote-Prokaryote
bASV17232	Bacteria	Gammaproteobacteria	Betaproteobacteriales	Methylophilaceae	OM43 clade	Unassigned OM43 clade (Genus)	bASV9830	Bacteria	Acidimicrobiia	Actinomarinales	Actinomarinaceae	Candidatus Actinomarina	Unassigned Candidatus Actinomarina (Genus)	0.0095682	Pos	Prokaryote-Prokaryote
bASV17232	Bacteria	Gammaproteobacteria	Betaproteobacteriales	Methylophilaceae	OM43 clade	Unassigned OM43 clade (Genus)	bASV15532	Bacteria	Gammaproteobacteria	Oceanospirillales	Litoricolaceae	Litoricola	uncultured bacterium	-0.00665845	Neg	Prokaryote-Prokaryote
bASV17243	Bacteria	Gammaproteobacteria	Betaproteobacteriales	Methylophilaceae	OM43 clade	Unassigned OM43 clade (Genus)	bASV15721	Bacteria	Gammaproteobacteria	Thiomicrospirales	Thioglobaceae	SUP05 cluster	uncultured bacterium	0.202939	Pos	Prokaryote-Prokaryote
bASV17243	Bacteria	Gammaproteobacteria	Betaproteobacteriales	Methylophilaceae	OM43 clade	Unassigned OM43 clade (Genus)	bASV6192	Bacteria	Bacteroidia	Flavobacteriales	Flavobacteriaceae	NS5 marine group	uncultured Flavobacterium sp.	0.0530035	Pos	Prokaryote-Prokaryote
bASV17243	Bacteria	Gammaproteobacteria	Betaproteobacteriales	Methylophilaceae	OM43 clade	Unassigned OM43 clade (Genus)	bASV6477	Bacteria	Bacteroidia	Flavobacteriales	Flavobacteriaceae	NS5 marine group	Unassigned NS5 marine group (Genus)	0.0954747	Pos	Prokaryote-Prokaryote
bASV17243	Bacteria	Gammaproteobacteria	Betaproteobacteriales	Methylophilaceae	OM43 clade	Unassigned OM43 clade (Genus)	bASV9874	Bacteria	Acidimicrobiia	Actinomarinales	Actinomarinaceae	Candidatus Actinomarina	Unassigned Candidatus Actinomarina (Genus)	0.090619	Pos	Prokaryote-Prokaryote
bASV17243	Bacteria	Gammaproteobacteria	Betaproteobacteriales	Methylophilaceae	OM43 clade	Unassigned OM43 clade (Genus)	bASV15531	Bacteria	Gammaproteobacteria	Oceanospirillales	Litoricolaceae	Litoricola	uncultured bacterium	0.0953868	Pos	Prokaryote-Prokaryote
bASV17243	Bacteria	Gammaproteobacteria	Betaproteobacteriales	Methylophilaceae	OM43 clade	Unassigned OM43 clade (Genus)	bASV15719	Bacteria	Gammaproteobacteria	Thiomicrospirales	Thioglobaceae	SUP05 cluster	uncultured bacterium	0.134108	Pos	Prokaryote-Prokaryote
bASV17243	Bacteria	Gammaproteobacteria	Betaproteobacteriales	Methylophilaceae	OM43 clade	Unassigned OM43 clade (Genus)	bASV10806	Bacteria	Alphaproteobacteria	Puniceispirillales	SAR116 clade	Unassigned SAR116 clade (Family)	Unassigned SAR116 clade (Family)	0.0992136	Pos	Prokaryote-Prokaryote
bASV17244	Bacteria	Gammaproteobacteria	Betaproteobacteriales	Methylophilaceae	OM43 clade	Unassigned OM43 clade (Genus)	bASV16796	Bacteria	Gammaproteobacteria	SAR86 clade	Unassigned SAR86 clade (Order)	Unassigned SAR86 clade (Order)	Unassigned SAR86 clade (Order)	0.0902287	Pos	Prokaryote-Prokaryote
bASV17244	Bacteria	Gammaproteobacteria	Betaproteobacteriales	Methylophilaceae	OM43 clade	Unassigned OM43 clade (Genus)	bASV12437	Bacteria	Alphaproteobacteria	Puniceispirillales	uncultured	Unassigned uncultured (Family)	Unassigned uncultured (Family)	0.00518848	Pos	Prokaryote-Prokaryote
bASV17256	Bacteria	Gammaproteobacteria	Betaproteobacteriales	Methylophilaceae	OM43 clade	Unassigned OM43 clade (Genus)	bASV9689	Bacteria	Actinobacteria	Micrococcales	Microbacteriaceae	Candidatus Aquiluna	uncultured bacterium	0.052108	Pos	Prokaryote-Prokaryote
bASV17256	Bacteria	Gammaproteobacteria	Betaproteobacteriales	Methylophilaceae	OM43 clade	Unassigned OM43 clade (Genus)	bASV16780	Bacteria	Gammaproteobacteria	SAR86 clade	Unassigned SAR86 clade (Order)	Unassigned SAR86 clade (Order)	Unassigned SAR86 clade (Order)	0.102452	Pos	Prokaryote-Prokaryote
bASV17256	Bacteria	Gammaproteobacteria	Betaproteobacteriales	Methylophilaceae	OM43 clade	Unassigned OM43 clade (Genus)	bASV11860	Bacteria	Alphaproteobacteria	Rhodobacterales	Rhodobacteraceae	Ascidiaceihabitans	Unassigned Ascidiaceihabitans (Genus)	0.0701237	Pos	Prokaryote-Prokaryote
bASV17256	Bacteria	Gammaproteobacteria	Betaproteobacteriales	Methylophilaceae	OM43 clade	Unassigned OM43 clade (Genus)	bASV6204	Bacteria	Bacteroidia	Flavobacteriales	Flavobacteriaceae	NS5 marine group	uncultured Flavobacterium sp.	0.0211913	Pos	Prokaryote-Prokaryote
bASV17256	Bacteria	Gammaproteobacteria	Betaproteobacteriales	Methylophilaceae	OM43 clade	Unassigned OM43 clade (Genus)	bASV7034	Bacteria	Bacteroidia	Flavobacteriales	Flavobacteriaceae	uncultured	marine metagenome	0.031449	Pos	Prokaryote-Prokaryote
bASV17736	Bacteria	Gammaproteobacteria	Cellvibrionales	Halieaceae	OM60(NOR5) clade	Unassigned OM60(NOR5) clade (Genus)	bASV8494	Bacteria	Deltaproteobacteria	SAR324 clade(Marine group B)	uncultured bacterium HF0010_10I05	uncultured bacterium HF0010_10I05	uncultured bacterium HF0010_10I05	0.113457	Pos	Prokaryote-Prokaryote
bASV17736	Bacteria	Gammaproteobacteria	Cellvibrionales	Halieaceae	OM60(NOR5) clade	Unassigned OM60(NOR5) clade (Genus)	bASV539	Bacteria	Alphaproteobacteria	SAR11 clade	Clade II	Unassigned Clade II (Family)	Unassigned Clade II (Family)	0.117829	Pos	Prokaryote-Prokaryote
bASV17736	Bacteria	Gammaproteobacteria	Cellvibrionales	Halieaceae	OM60(NOR5) clade	Unassigned OM60(NOR5) clade (Genus)	bASV12437	Bacteria	Alphaproteobacteria	Puniceispirillales	uncultured	Unassigned uncultured (Family)	Unassigned uncultured (Family)	0.104517	Pos	Prokaryote-Prokaryote
bASV17739	Bacteria	Gammaproteobacteria	Cellvibrionales	Halieaceae	OM60(NOR5) clade	Unassigned OM60(NOR5) clade (Genus)	bASV17256	Bacteria	Gammaproteobacteria	Betaproteobacteriales	Methylophilaceae	OM43 clade	Unassigned OM43 clade (Genus)	0.00101105	Pos	Prokaryote-Prokaryote
bASV17739	Bacteria	Gammaproteobacteria	Cellvibrionales	Halieaceae	OM60(NOR5) clade	Unassigned OM60(NOR5) clade (Genus)	bASV6477	Bacteria	Bacteroidia	Flavobacteriales	Flavobacteriaceae	NS5 marine group	Unassigned NS5 marine group (Genus)	0.026151	Pos	Prokaryote-Prokaryote
bASV17739	Bacteria	Gammaproteobacteria	Cellvibrionales	Halieaceae	OM60(NOR5) clade	Unassigned OM60(NOR5) clade (Genus)	bASV674	Bacteria	Alphaproteobacteria	SAR11 clade	Clade I	Clade Ia	Unassigned Clade Ia (Genus)	0.00543436	Pos	Prokaryote-Prokaryote
bASV17819	Bacteria	Gammaproteobacteria	Cellvibrionales	Halieaceae	Luminiphilus	uncultured gamma proteobacterium	bASV6791	Bacteria	Bacteroidia	Flavobacteriales	Flavobacteriaceae	Aureimarina	Unassigned Aureimarina (Genus)	0.0799139	Pos	Prokaryote-Prokaryote
bASV17819	Bacteria	Gammaproteobacteria	Cellvibrionales	Halieaceae	Luminiphilus	uncultured gamma proteobacterium	bASV10806	Bacteria	Alphaproteobacteria	Puniceispirillales	SAR116 clade	Unassigned SAR116 clade (Family)	Unassigned SAR116 clade (Family)	-0.0319318	Neg	Prokaryote-Prokaryote
bASV17819	Bacteria	Gammaproteobacteria	Cellvibrionales	Halieaceae	Luminiphilus	uncultured gamma proteobacterium	bASV6842	Bacteria	Bacteroidia	Flavobacteriales	Flavobacteriaceae	NS3a marine group	Unassigned NS3a marine group (Genus)	0.000390406	Pos	Prokaryote-Prokaryote
bASV17819	Bacteria	Gammaproteobacteria	Cellvibrionales	Halieaceae	Luminiphilus	uncultured gamma proteobacterium	bASV10814	Bacteria	Alphaproteobacteria	Puniceispirillales	SAR116 clade	Unassigned SAR116 clade (Family)	Unassigned SAR116 clade (Family)	0.0266404	Pos	Prokaryote-Prokaryote
bASV17819	Bacteria	Gammaproteobacteria	Cellvibrionales	Halieaceae	Luminiphilus	uncultured gamma proteobacterium	bASV11003	Bacteria	Alphaproteobacteria	Puniceispirillales	SAR116 clade	Candidatus Puniceispirillum	uncultured bacterium	-0.000461885	Neg	Prokaryote-Prokaryote
bASV17819	Bacteria	Gammaproteobacteria	Cellvibrionales	Halieaceae	Luminiphilus	uncultured gamma proteobacterium	bASV17736	Bacteria	Gammaproteobacteria	Cellvibrionales	Halieaceae	OM60(NOR5) clade	Unassigned OM60(NOR5) clade (Genus)	0.101138	Pos	Prokaryote-Prokaryote
bASV17819	Bacteria	Gammaproteobacteria	Cellvibrionales	Halieaceae	Luminiphilus	uncultured gamma proteobacterium	bASV11905	Bacteria	Alphaproteobacteria	Rhodobacterales	Rhodobacteraceae	Unassigned Rhodobacteraceae (Family)	Unassigned Rhodobacteraceae (Family)	0.00817076	Pos	Prokaryote-Prokaryote
bASV17971	Bacteria	Gammaproteobacteria	OM182 clade	OM182 bacterium D4	OM182 bacterium D4	OM182 bacterium D4	bASV17230	Bacteria	Gammaproteobacteria	Betaproteobacteriales	Methylophilaceae	OM43 clade	Unassigned OM43 clade (Genus)	0.0484865	Pos	Prokaryote-Prokaryote
bASV17971	Bacteria	Gammaproteobacteria	OM182 clade	OM182 bacterium D4	OM182 bacterium D4	OM182 bacterium D4	bASV11627	Bacteria	Alphaproteobacteria	Rhodobacterales	Rhodobacteraceae	Lentibacter	uncultured bacterium	0.177998	Pos	Prokaryote-Prokaryote
bASV17971	Bacteria	Gammaproteobacteria	OM182 clade	OM182 bacterium D4	OM182 bacterium D4	OM182 bacterium D4	bASV7452	Bacteria	Bacteroidia	Flavobacteriales	Crocinitomicaceae	Crocinitomix	unidentified marine bacterioplankton	0.262329	Pos	Prokaryote-Prokaryote
bASV17971	Bacteria	Gammaproteobacteria	OM182 clade	OM182 bacterium D4	OM182 bacterium D4	OM182 bacterium D4	bASV6841	Bacteria	Bacteroidia	Flavobacteriales	Flavobacteriaceae	NS3a marine group	Unassigned NS3a marine group (Genus)	0.0263987	Pos	Prokaryote-Prokaryote
bASV17971	Bacteria	Gammaproteobacteria	OM182 clade	OM182 bacterium D4	OM182 bacterium D4	OM182 bacterium D4	bASV11620	Bacteria	Alphaproteobacteria	Rhodobacterales	Rhodobacteraceae	Planktomarina	Unassigned Planktomarina (Genus)	0.0190207	Pos	Prokaryote-Prokaryote
bASV17996	Bacteria	Gammaproteobacteria	Cellvibrionales	Spongiibacteraceae	Unassigned Spongiibacteraceae (Family)	Unassigned Spongiibacteraceae (Family)	bASV6201	Bacteria	Bacteroidia	Flavobacteriales	Flavobacteriaceae	NS5 marine group	uncultured Flavobacterium sp.	0.0125415	Pos	Prokaryote-Prokaryote
bASV17996	Bacteria	Gammaproteobacteria	Cellvibrionales	Spongiibacteraceae	Unassigned Spongiibacteraceae (Family)	Unassigned Spongiibacteraceae (Family)	bASV11859	Bacteria	Alphaproteobacteria	Rhodobacterales	Rhodobacteraceae	Ascidiaceihabitans	Unassigned Ascidiaceihabitans (Genus)	0.0568339	Pos	Prokaryote-Prokaryote
bASV17996	Bacteria	Gammaproteobacteria	Cellvibrionales	Spongiibacteraceae	Unassigned Spongiibacteraceae (Family)	Unassigned Spongiibacteraceae (Family)	bASV10826	Bacteria	Alphaproteobacteria	Puniceispirillales	SAR116 clade	Unassigned SAR116 clade (Family)	Unassigned SAR116 clade (Family)	0.0576075	Pos	Prokaryote-Prokaryote
bASV17996	Bacteria	Gammaproteobacteria	Cellvibrionales	Spongiibacteraceae	Unassigned Spongiibacteraceae (Family)	Unassigned Spongiibacteraceae (Family)	bASV16780	Bacteria	Gammaproteobacteria	SAR86 clade	Unassigned SAR86 clade (Order)	Unassigned SAR86 clade (Order)	Unassigned SAR86 clade (Order)	0.192479	Pos	Prokaryote-Prokaryote
bASV17996	Bacteria	Gammaproteobacteria	Cellvibrionales	Spongiibacteraceae	Unassigned Spongiibacteraceae (Family)	Unassigned Spongiibacteraceae (Family)	bASV644	Bacteria	Alphaproteobacteria	SAR11 clade	Clade I	Clade Ia	Unassigned Clade Ia (Genus)	0.262993	Pos	Prokaryote-Prokaryote
bASV17996	Bacteria	Gammaproteobacteria	Cellvibrionales	Spongiibacteraceae	Unassigned Spongiibacteraceae (Family)	Unassigned Spongiibacteraceae (Family)	bASV9839	Bacteria	Acidimicrobiia	Actinomarinales	Actinomarinaceae	Candidatus Actinomarina	uncultured actinobacterium	0.0366681	Pos	Prokaryote-Prokaryote
bASV18264	Bacteria	Gammaproteobacteria	Oceanospirillales	Pseudohongiellaceae	Pseudohongiella	Unassigned Pseudohongiella (Genus)	bASV16742	Bacteria	Gammaproteobacteria	SAR86 clade	Unassigned SAR86 clade (Order)	Unassigned SAR86 clade (Order)	Unassigned SAR86 clade (Order)	0.089843	Pos	Prokaryote-Prokaryote
bASV18264	Bacteria	Gammaproteobacteria	Oceanospirillales	Pseudohongiellaceae	Pseudohongiella	Unassigned Pseudohongiella (Genus)	bASV17222	Bacteria	Gammaproteobacteria	Betaproteobacteriales	Methylophilaceae	OM43 clade	Unassigned OM43 clade (Genus)	0.0057094	Pos	Prokaryote-Prokaryote
bASV18264	Bacteria	Gammaproteobacteria	Oceanospirillales	Pseudohongiellaceae	Pseudohongiella	Unassigned Pseudohongiella (Genus)	bASV10806	Bacteria	Alphaproteobacteria	Puniceispirillales	SAR116 clade	Unassigned SAR116 clade (Family)	Unassigned SAR116 clade (Family)	-0.00309089	Neg	Prokaryote-Prokaryote
bASV18269	Bacteria	Gammaproteobacteria	Oceanospirillales	Pseudohongiellaceae	Pseudohongiella	Unassigned Pseudohongiella (Genus)	bASV7135	Bacteria	Bacteroidia	Flavobacteriales	Flavobacteriaceae	uncultured	Flavobacteriaceae bacterium LE20	0.213183	Pos	Prokaryote-Prokaryote
bASV18269	Bacteria	Gammaproteobacteria	Oceanospirillales	Pseudohongiellaceae	Pseudohongiella	Unassigned Pseudohongiella (Genus)	bASV9724	Bacteria	Actinobacteria	Micrococcales	Microbacteriaceae	Unassigned Microbacteriaceae (Family)	Unassigned Microbacteriaceae (Family)	0.0091985	Pos	Prokaryote-Prokaryote
bASV18269	Bacteria	Gammaproteobacteria	Oceanospirillales	Pseudohongiellaceae	Pseudohongiella	Unassigned Pseudohongiella (Genus)	bASV10989	Bacteria	Alphaproteobacteria	Puniceispirillales	SAR116 clade	Candidatus Puniceispirillum	uncultured bacterium	0.00574829	Pos	Prokaryote-Prokaryote
bASV18269	Bacteria	Gammaproteobacteria	Oceanospirillales	Pseudohongiellaceae	Pseudohongiella	Unassigned Pseudohongiella (Genus)	bASV11626	Bacteria	Alphaproteobacteria	Rhodobacterales	Rhodobacteraceae	Lentibacter	uncultured bacterium	0.0257833	Pos	Prokaryote-Prokaryote
bASV18269	Bacteria	Gammaproteobacteria	Oceanospirillales	Pseudohongiellaceae	Pseudohongiella	Unassigned Pseudohongiella (Genus)	bASV5899	Bacteria	Bacteroidia	Flavobacteriales	Cryomorphaceae	uncultured	Unassigned uncultured (Genus)	0.0475138	Pos	Prokaryote-Prokaryote
bASV18269	Bacteria	Gammaproteobacteria	Oceanospirillales	Pseudohongiellaceae	Pseudohongiella	Unassigned Pseudohongiella (Genus)	bASV6204	Bacteria	Bacteroidia	Flavobacteriales	Flavobacteriaceae	NS5 marine group	uncultured Flavobacterium sp.	0.0494041	Pos	Prokaryote-Prokaryote
bASV18269	Bacteria	Gammaproteobacteria	Oceanospirillales	Pseudohongiellaceae	Pseudohongiella	Unassigned Pseudohongiella (Genus)	bASV10990	Bacteria	Alphaproteobacteria	Puniceispirillales	SAR116 clade	Candidatus Puniceispirillum	uncultured bacterium	0.0486781	Pos	Prokaryote-Prokaryote
bASV18272	Bacteria	Gammaproteobacteria	Oceanospirillales	Pseudohongiellaceae	Pseudohongiella	Unassigned Pseudohongiella (Genus)	bASV16740	Bacteria	Gammaproteobacteria	SAR86 clade	Unassigned SAR86 clade (Order)	Unassigned SAR86 clade (Order)	Unassigned SAR86 clade (Order)	0.107363	Pos	Prokaryote-Prokaryote
bASV18272	Bacteria	Gammaproteobacteria	Oceanospirillales	Pseudohongiellaceae	Pseudohongiella	Unassigned Pseudohongiella (Genus)	bASV10826	Bacteria	Alphaproteobacteria	Puniceispirillales	SAR116 clade	Unassigned SAR116 clade (Family)	Unassigned SAR116 clade (Family)	0.00675985	Pos	Prokaryote-Prokaryote
bASV18272	Bacteria	Gammaproteobacteria	Oceanospirillales	Pseudohongiellaceae	Pseudohongiella	Unassigned Pseudohongiella (Genus)	bASV11872	Bacteria	Alphaproteobacteria	Rhodobacterales	Rhodobacteraceae	Unassigned Rhodobacteraceae (Family)	Unassigned Rhodobacteraceae (Family)	-0.0294839	Neg	Prokaryote-Prokaryote
bASV18272	Bacteria	Gammaproteobacteria	Oceanospirillales	Pseudohongiellaceae	Pseudohongiella	Unassigned Pseudohongiella (Genus)	bASV11873	Bacteria	Alphaproteobacteria	Rhodobacterales	Rhodobacteraceae	Unassigned Rhodobacteraceae (Family)	Unassigned Rhodobacteraceae (Family)	0.0622879	Pos	Prokaryote-Prokaryote
bASV18272	Bacteria	Gammaproteobacteria	Oceanospirillales	Pseudohongiellaceae	Pseudohongiella	Unassigned Pseudohongiella (Genus)	bASV6841	Bacteria	Bacteroidia	Flavobacteriales	Flavobacteriaceae	NS3a marine group	Unassigned NS3a marine group (Genus)	0.131231	Pos	Prokaryote-Prokaryote
bASV3593	Archaea	Thermoplasmata	Marine Group II	uncultured marine archaeon DCM3921	uncultured marine archaeon DCM3921	uncultured marine archaeon DCM3921	bASV545	Bacteria	Alphaproteobacteria	SAR11 clade	Clade II	Unassigned Clade II (Family)	Unassigned Clade II (Family)	0.0753984	Pos	Prokaryote-Prokaryote
bASV3706	Archaea	Thermoplasmata	Marine Group II	marine metagenome	marine metagenome	marine metagenome	bASV674	Bacteria	Alphaproteobacteria	SAR11 clade	Clade I	Clade Ia	Unassigned Clade Ia (Genus)	0.0403366	Pos	Prokaryote-Prokaryote
bASV3706	Archaea	Thermoplasmata	Marine Group II	marine metagenome	marine metagenome	marine metagenome	bASV704	Bacteria	Alphaproteobacteria	SAR11 clade	Clade III	Unassigned Clade III (Family)	Unassigned Clade III (Family)	0.0193998	Pos	Prokaryote-Prokaryote
bASV5899	Bacteria	Bacteroidia	Flavobacteriales	Cryomorphaceae	uncultured	Unassigned uncultured (Genus)	bASV704	Bacteria	Alphaproteobacteria	SAR11 clade	Clade III	Unassigned Clade III (Family)	Unassigned Clade III (Family)	-0.0593592	Neg	Prokaryote-Prokaryote
bASV5901	Bacteria	Bacteroidia	Flavobacteriales	Cryomorphaceae	uncultured	Unassigned uncultured (Genus)	bASV5899	Bacteria	Bacteroidia	Flavobacteriales	Cryomorphaceae	uncultured	Unassigned uncultured (Genus)	-0.0134489	Neg	Prokaryote-Prokaryote
bASV5903	Bacteria	Bacteroidia	Flavobacteriales	Cryomorphaceae	uncultured	Unassigned uncultured (Genus)	bASV564	Bacteria	Alphaproteobacteria	SAR11 clade	Clade II	Unassigned Clade II (Family)	Unassigned Clade II (Family)	0.385229	Pos	Prokaryote-Prokaryote
bASV5903	Bacteria	Bacteroidia	Flavobacteriales	Cryomorphaceae	uncultured	Unassigned uncultured (Genus)	bASV539	Bacteria	Alphaproteobacteria	SAR11 clade	Clade II	Unassigned Clade II (Family)	Unassigned Clade II (Family)	0.0437635	Pos	Prokaryote-Prokaryote
bASV5906	Bacteria	Bacteroidia	Flavobacteriales	Cryomorphaceae	uncultured	Unassigned uncultured (Genus)	bASV643	Bacteria	Alphaproteobacteria	SAR11 clade	Clade I	Clade Ia	Unassigned Clade Ia (Genus)	0.0233633	Pos	Prokaryote-Prokaryote
bASV5906	Bacteria	Bacteroidia	Flavobacteriales	Cryomorphaceae	uncultured	Unassigned uncultured (Genus)	bASV5901	Bacteria	Bacteroidia	Flavobacteriales	Cryomorphaceae	uncultured	Unassigned uncultured (Genus)	-0.0231422	Neg	Prokaryote-Prokaryote
bASV5906	Bacteria	Bacteroidia	Flavobacteriales	Cryomorphaceae	uncultured	Unassigned uncultured (Genus)	bASV5899	Bacteria	Bacteroidia	Flavobacteriales	Cryomorphaceae	uncultured	Unassigned uncultured (Genus)	-0.274492	Neg	Prokaryote-Prokaryote
bASV6192	Bacteria	Bacteroidia	Flavobacteriales	Flavobacteriaceae	NS5 marine group	uncultured Flavobacterium sp.	bASV3593	Archaea	Thermoplasmata	Marine Group II	uncultured marine archaeon DCM3921	uncultured marine archaeon DCM3921	uncultured marine archaeon DCM3921	0.0401318	Pos	Prokaryote-Prokaryote
bASV6193	Bacteria	Bacteroidia	Flavobacteriales	Flavobacteriaceae	NS5 marine group	uncultured Flavobacterium sp.	bASV5906	Bacteria	Bacteroidia	Flavobacteriales	Cryomorphaceae	uncultured	Unassigned uncultured (Genus)	0.0699668	Pos	Prokaryote-Prokaryote
bASV6193	Bacteria	Bacteroidia	Flavobacteriales	Flavobacteriaceae	NS5 marine group	uncultured Flavobacterium sp.	bASV6192	Bacteria	Bacteroidia	Flavobacteriales	Flavobacteriaceae	NS5 marine group	uncultured Flavobacterium sp.	-0.15136	Neg	Prokaryote-Prokaryote
bASV6201	Bacteria	Bacteroidia	Flavobacteriales	Flavobacteriaceae	NS5 marine group	uncultured Flavobacterium sp.	bASV644	Bacteria	Alphaproteobacteria	SAR11 clade	Clade I	Clade Ia	Unassigned Clade Ia (Genus)	0.178611	Pos	Prokaryote-Prokaryote
bASV6204	Bacteria	Bacteroidia	Flavobacteriales	Flavobacteriaceae	NS5 marine group	uncultured Flavobacterium sp.	bASV646	Bacteria	Alphaproteobacteria	SAR11 clade	Clade I	Clade Ia	Unassigned Clade Ia (Genus)	0.00288197	Pos	Prokaryote-Prokaryote
bASV6260	Bacteria	Bacteroidia	Flavobacteriales	Flavobacteriaceae	NS5 marine group	Unassigned NS5 marine group (Genus)	bASV643	Bacteria	Alphaproteobacteria	SAR11 clade	Clade I	Clade Ia	Unassigned Clade Ia (Genus)	0.00955028	Pos	Prokaryote-Prokaryote
bASV6260	Bacteria	Bacteroidia	Flavobacteriales	Flavobacteriaceae	NS5 marine group	Unassigned NS5 marine group (Genus)	bASV680	Bacteria	Alphaproteobacteria	SAR11 clade	Clade I	Clade Ia	Unassigned Clade Ia (Genus)	-0.102975	Neg	Prokaryote-Prokaryote
bASV6260	Bacteria	Bacteroidia	Flavobacteriales	Flavobacteriaceae	NS5 marine group	Unassigned NS5 marine group (Genus)	bASV6259	Bacteria	Bacteroidia	Flavobacteriales	Flavobacteriaceae	NS5 marine group	Unassigned NS5 marine group (Genus)	-0.066574	Neg	Prokaryote-Prokaryote
bASV6260	Bacteria	Bacteroidia	Flavobacteriales	Flavobacteriaceae	NS5 marine group	Unassigned NS5 marine group (Genus)	bASV652	Bacteria	Alphaproteobacteria	SAR11 clade	Clade I	Clade Ia	Unassigned Clade Ia (Genus)	-0.0290969	Neg	Prokaryote-Prokaryote
bASV6277	Bacteria	Bacteroidia	Flavobacteriales	Flavobacteriaceae	NS5 marine group	uncultured Flavobacterium sp.	bASV6192	Bacteria	Bacteroidia	Flavobacteriales	Flavobacteriaceae	NS5 marine group	uncultured Flavobacterium sp.	-0.000382752	Neg	Prokaryote-Prokaryote
bASV6279	Bacteria	Bacteroidia	Flavobacteriales	Flavobacteriaceae	NS5 marine group	uncultured Flavobacterium sp.	bASV646	Bacteria	Alphaproteobacteria	SAR11 clade	Clade I	Clade Ia	Unassigned Clade Ia (Genus)	0.0597406	Pos	Prokaryote-Prokaryote
bASV6285	Bacteria	Bacteroidia	Flavobacteriales	Flavobacteriaceae	NS5 marine group	uncultured Flavobacterium sp.	bASV6225	Bacteria	Bacteroidia	Flavobacteriales	Flavobacteriaceae	NS5 marine group	uncultured Bacteroidetes bacterium	0.0346599	Pos	Prokaryote-Prokaryote
bASV6285	Bacteria	Bacteroidia	Flavobacteriales	Flavobacteriaceae	NS5 marine group	uncultured Flavobacterium sp.	bASV6277	Bacteria	Bacteroidia	Flavobacteriales	Flavobacteriaceae	NS5 marine group	uncultured Flavobacterium sp.	-0.140743	Neg	Prokaryote-Prokaryote
bASV646	Bacteria	Alphaproteobacteria	SAR11 clade	Clade I	Clade Ia	Unassigned Clade Ia (Genus)	bASV564	Bacteria	Alphaproteobacteria	SAR11 clade	Clade II	Unassigned Clade II (Family)	Unassigned Clade II (Family)	0.171147	Pos	Prokaryote-Prokaryote
bASV647	Bacteria	Alphaproteobacteria	SAR11 clade	Clade I	Clade Ia	Unassigned Clade Ia (Genus)	bASV642	Bacteria	Alphaproteobacteria	SAR11 clade	Clade I	Clade Ia	Unassigned Clade Ia (Genus)	-0.0778501	Neg	Prokaryote-Prokaryote
bASV648	Bacteria	Alphaproteobacteria	SAR11 clade	Clade I	Clade Ia	Unassigned Clade Ia (Genus)	bASV642	Bacteria	Alphaproteobacteria	SAR11 clade	Clade I	Clade Ia	Unassigned Clade Ia (Genus)	-0.0489824	Neg	Prokaryote-Prokaryote
bASV652	Bacteria	Alphaproteobacteria	SAR11 clade	Clade I	Clade Ia	Unassigned Clade Ia (Genus)	bASV648	Bacteria	Alphaproteobacteria	SAR11 clade	Clade I	Clade Ia	Unassigned Clade Ia (Genus)	-0.0131595	Neg	Prokaryote-Prokaryote
bASV652	Bacteria	Alphaproteobacteria	SAR11 clade	Clade I	Clade Ia	Unassigned Clade Ia (Genus)	bASV642	Bacteria	Alphaproteobacteria	SAR11 clade	Clade I	Clade Ia	Unassigned Clade Ia (Genus)	0.0196714	Pos	Prokaryote-Prokaryote
bASV653	Bacteria	Alphaproteobacteria	SAR11 clade	Clade I	Clade Ia	Unassigned Clade Ia (Genus)	bASV648	Bacteria	Alphaproteobacteria	SAR11 clade	Clade I	Clade Ia	Unassigned Clade Ia (Genus)	0.318463	Pos	Prokaryote-Prokaryote
bASV6546	Bacteria	Bacteroidia	Flavobacteriales	Flavobacteriaceae	NS4 marine group	Unassigned NS4 marine group (Genus)	bASV646	Bacteria	Alphaproteobacteria	SAR11 clade	Clade I	Clade Ia	Unassigned Clade Ia (Genus)	0.0505075	Pos	Prokaryote-Prokaryote
bASV6546	Bacteria	Bacteroidia	Flavobacteriales	Flavobacteriaceae	NS4 marine group	Unassigned NS4 marine group (Genus)	bASV5900	Bacteria	Bacteroidia	Flavobacteriales	Cryomorphaceae	uncultured	Unassigned uncultured (Genus)	0.140591	Pos	Prokaryote-Prokaryote
bASV6547	Bacteria	Bacteroidia	Flavobacteriales	Flavobacteriaceae	NS4 marine group	Unassigned NS4 marine group (Genus)	bASV6477	Bacteria	Bacteroidia	Flavobacteriales	Flavobacteriaceae	NS5 marine group	Unassigned NS5 marine group (Genus)	0.190318	Pos	Prokaryote-Prokaryote
bASV655	Bacteria	Alphaproteobacteria	SAR11 clade	Clade I	Clade Ia	Unassigned Clade Ia (Genus)	bASV642	Bacteria	Alphaproteobacteria	SAR11 clade	Clade I	Clade Ia	Unassigned Clade Ia (Genus)	-0.00981313	Neg	Prokaryote-Prokaryote
bASV655	Bacteria	Alphaproteobacteria	SAR11 clade	Clade I	Clade Ia	Unassigned Clade Ia (Genus)	bASV650	Bacteria	Alphaproteobacteria	SAR11 clade	Clade I	Clade Ia	Unassigned Clade Ia (Genus)	0.0288328	Pos	Prokaryote-Prokaryote
bASV655	Bacteria	Alphaproteobacteria	SAR11 clade	Clade I	Clade Ia	Unassigned Clade Ia (Genus)	bASV643	Bacteria	Alphaproteobacteria	SAR11 clade	Clade I	Clade Ia	Unassigned Clade Ia (Genus)	0.213023	Pos	Prokaryote-Prokaryote
bASV655	Bacteria	Alphaproteobacteria	SAR11 clade	Clade I	Clade Ia	Unassigned Clade Ia (Genus)	bASV648	Bacteria	Alphaproteobacteria	SAR11 clade	Clade I	Clade Ia	Unassigned Clade Ia (Genus)	0.0605557	Pos	Prokaryote-Prokaryote
bASV655	Bacteria	Alphaproteobacteria	SAR11 clade	Clade I	Clade Ia	Unassigned Clade Ia (Genus)	bASV652	Bacteria	Alphaproteobacteria	SAR11 clade	Clade I	Clade Ia	Unassigned Clade Ia (Genus)	-0.11998	Neg	Prokaryote-Prokaryote
bASV656	Bacteria	Alphaproteobacteria	SAR11 clade	Clade I	Clade Ia	Unassigned Clade Ia (Genus)	bASV652	Bacteria	Alphaproteobacteria	SAR11 clade	Clade I	Clade Ia	Unassigned Clade Ia (Genus)	-0.0335762	Neg	Prokaryote-Prokaryote
bASV656	Bacteria	Alphaproteobacteria	SAR11 clade	Clade I	Clade Ia	Unassigned Clade Ia (Genus)	bASV653	Bacteria	Alphaproteobacteria	SAR11 clade	Clade I	Clade Ia	Unassigned Clade Ia (Genus)	-0.09776	Neg	Prokaryote-Prokaryote
bASV657	Bacteria	Alphaproteobacteria	SAR11 clade	Clade I	Clade Ia	Unassigned Clade Ia (Genus)	bASV647	Bacteria	Alphaproteobacteria	SAR11 clade	Clade I	Clade Ia	Unassigned Clade Ia (Genus)	0.0714621	Pos	Prokaryote-Prokaryote
bASV6638	Bacteria	Bacteroidia	Flavobacteriales	Flavobacteriaceae	Formosa	Unassigned Formosa (Genus)	bASV653	Bacteria	Alphaproteobacteria	SAR11 clade	Clade I	Clade Ia	Unassigned Clade Ia (Genus)	0.103199	Pos	Prokaryote-Prokaryote
bASV6638	Bacteria	Bacteroidia	Flavobacteriales	Flavobacteriaceae	Formosa	Unassigned Formosa (Genus)	bASV6201	Bacteria	Bacteroidia	Flavobacteriales	Flavobacteriaceae	NS5 marine group	uncultured Flavobacterium sp.	0.0145587	Pos	Prokaryote-Prokaryote
bASV674	Bacteria	Alphaproteobacteria	SAR11 clade	Clade I	Clade Ia	Unassigned Clade Ia (Genus)	bASV564	Bacteria	Alphaproteobacteria	SAR11 clade	Clade II	Unassigned Clade II (Family)	Unassigned Clade II (Family)	0.0293803	Pos	Prokaryote-Prokaryote
bASV674	Bacteria	Alphaproteobacteria	SAR11 clade	Clade I	Clade Ia	Unassigned Clade Ia (Genus)	bASV656	Bacteria	Alphaproteobacteria	SAR11 clade	Clade I	Clade Ia	Unassigned Clade Ia (Genus)	0.248619	Pos	Prokaryote-Prokaryote
bASV675	Bacteria	Alphaproteobacteria	SAR11 clade	Clade I	Clade Ia	Unassigned Clade Ia (Genus)	bASV674	Bacteria	Alphaproteobacteria	SAR11 clade	Clade I	Clade Ia	Unassigned Clade Ia (Genus)	-0.0107334	Neg	Prokaryote-Prokaryote
bASV675	Bacteria	Alphaproteobacteria	SAR11 clade	Clade I	Clade Ia	Unassigned Clade Ia (Genus)	bASV653	Bacteria	Alphaproteobacteria	SAR11 clade	Clade I	Clade Ia	Unassigned Clade Ia (Genus)	0.130358	Pos	Prokaryote-Prokaryote
bASV675	Bacteria	Alphaproteobacteria	SAR11 clade	Clade I	Clade Ia	Unassigned Clade Ia (Genus)	bASV656	Bacteria	Alphaproteobacteria	SAR11 clade	Clade I	Clade Ia	Unassigned Clade Ia (Genus)	0.268967	Pos	Prokaryote-Prokaryote
bASV679	Bacteria	Alphaproteobacteria	SAR11 clade	Clade I	Clade Ia	Unassigned Clade Ia (Genus)	bASV644	Bacteria	Alphaproteobacteria	SAR11 clade	Clade I	Clade Ia	Unassigned Clade Ia (Genus)	0.0529037	Pos	Prokaryote-Prokaryote
bASV679	Bacteria	Alphaproteobacteria	SAR11 clade	Clade I	Clade Ia	Unassigned Clade Ia (Genus)	bASV655	Bacteria	Alphaproteobacteria	SAR11 clade	Clade I	Clade Ia	Unassigned Clade Ia (Genus)	0.17312	Pos	Prokaryote-Prokaryote
bASV6791	Bacteria	Bacteroidia	Flavobacteriales	Flavobacteriaceae	Aureimarina	Unassigned Aureimarina (Genus)	bASV644	Bacteria	Alphaproteobacteria	SAR11 clade	Clade I	Clade Ia	Unassigned Clade Ia (Genus)	0.0162828	Pos	Prokaryote-Prokaryote
bASV6791	Bacteria	Bacteroidia	Flavobacteriales	Flavobacteriaceae	Aureimarina	Unassigned Aureimarina (Genus)	bASV6192	Bacteria	Bacteroidia	Flavobacteriales	Flavobacteriaceae	NS5 marine group	uncultured Flavobacterium sp.	-0.0316001	Neg	Prokaryote-Prokaryote
bASV6791	Bacteria	Bacteroidia	Flavobacteriales	Flavobacteriaceae	Aureimarina	Unassigned Aureimarina (Genus)	bASV6204	Bacteria	Bacteroidia	Flavobacteriales	Flavobacteriaceae	NS5 marine group	uncultured Flavobacterium sp.	0.0747318	Pos	Prokaryote-Prokaryote
bASV680	Bacteria	Alphaproteobacteria	SAR11 clade	Clade I	Clade Ia	Unassigned Clade Ia (Genus)	bASV656	Bacteria	Alphaproteobacteria	SAR11 clade	Clade I	Clade Ia	Unassigned Clade Ia (Genus)	-0.0246111	Neg	Prokaryote-Prokaryote
bASV680	Bacteria	Alphaproteobacteria	SAR11 clade	Clade I	Clade Ia	Unassigned Clade Ia (Genus)	bASV661	Bacteria	Alphaproteobacteria	SAR11 clade	Clade I	Clade Ia	Unassigned Clade Ia (Genus)	0.0244972	Pos	Prokaryote-Prokaryote
bASV680	Bacteria	Alphaproteobacteria	SAR11 clade	Clade I	Clade Ia	Unassigned Clade Ia (Genus)	bASV679	Bacteria	Alphaproteobacteria	SAR11 clade	Clade I	Clade Ia	Unassigned Clade Ia (Genus)	-0.0673192	Neg	Prokaryote-Prokaryote
bASV680	Bacteria	Alphaproteobacteria	SAR11 clade	Clade I	Clade Ia	Unassigned Clade Ia (Genus)	bASV652	Bacteria	Alphaproteobacteria	SAR11 clade	Clade I	Clade Ia	Unassigned Clade Ia (Genus)	0.354922	Pos	Prokaryote-Prokaryote
bASV680	Bacteria	Alphaproteobacteria	SAR11 clade	Clade I	Clade Ia	Unassigned Clade Ia (Genus)	bASV674	Bacteria	Alphaproteobacteria	SAR11 clade	Clade I	Clade Ia	Unassigned Clade Ia (Genus)	-0.003062	Neg	Prokaryote-Prokaryote
bASV6841	Bacteria	Bacteroidia	Flavobacteriales	Flavobacteriaceae	NS3a marine group	Unassigned NS3a marine group (Genus)	bASV647	Bacteria	Alphaproteobacteria	SAR11 clade	Clade I	Clade Ia	Unassigned Clade Ia (Genus)	0.0333023	Pos	Prokaryote-Prokaryote
bASV6842	Bacteria	Bacteroidia	Flavobacteriales	Flavobacteriaceae	NS3a marine group	Unassigned NS3a marine group (Genus)	bASV6225	Bacteria	Bacteroidia	Flavobacteriales	Flavobacteriaceae	NS5 marine group	uncultured Bacteroidetes bacterium	0.0242016	Pos	Prokaryote-Prokaryote
bASV6842	Bacteria	Bacteroidia	Flavobacteriales	Flavobacteriaceae	NS3a marine group	Unassigned NS3a marine group (Genus)	bASV6841	Bacteria	Bacteroidia	Flavobacteriales	Flavobacteriaceae	NS3a marine group	Unassigned NS3a marine group (Genus)	-0.193838	Neg	Prokaryote-Prokaryote
bASV6842	Bacteria	Bacteroidia	Flavobacteriales	Flavobacteriaceae	NS3a marine group	Unassigned NS3a marine group (Genus)	bASV669	Bacteria	Alphaproteobacteria	SAR11 clade	Clade I	Clade Ia	Unassigned Clade Ia (Genus)	0.0156859	Pos	Prokaryote-Prokaryote
bASV7030	Bacteria	Bacteroidia	Flavobacteriales	Flavobacteriaceae	uncultured	marine metagenome	bASV5017	Bacteria	Bacteroidia	Sphingobacteriales	NS11-12 marine group	uncultured Bacteroidetes bacterium	uncultured Bacteroidetes bacterium	0.00458101	Pos	Prokaryote-Prokaryote
bASV7030	Bacteria	Bacteroidia	Flavobacteriales	Flavobacteriaceae	uncultured	marine metagenome	bASV5901	Bacteria	Bacteroidia	Flavobacteriales	Cryomorphaceae	uncultured	Unassigned uncultured (Genus)	0.000737174	Pos	Prokaryote-Prokaryote
bASV704	Bacteria	Alphaproteobacteria	SAR11 clade	Clade III	Unassigned Clade III (Family)	Unassigned Clade III (Family)	bASV669	Bacteria	Alphaproteobacteria	SAR11 clade	Clade I	Clade Ia	Unassigned Clade Ia (Genus)	0.0210879	Pos	Prokaryote-Prokaryote
bASV7135	Bacteria	Bacteroidia	Flavobacteriales	Flavobacteriaceae	uncultured	Flavobacteriaceae bacterium LE20	bASV6225	Bacteria	Bacteroidia	Flavobacteriales	Flavobacteriaceae	NS5 marine group	uncultured Bacteroidetes bacterium	0.0827429	Pos	Prokaryote-Prokaryote
bASV7135	Bacteria	Bacteroidia	Flavobacteriales	Flavobacteriaceae	uncultured	Flavobacteriaceae bacterium LE20	bASV6204	Bacteria	Bacteroidia	Flavobacteriales	Flavobacteriaceae	NS5 marine group	uncultured Flavobacterium sp.	0.0472912	Pos	Prokaryote-Prokaryote
bASV7452	Bacteria	Bacteroidia	Flavobacteriales	Crocinitomicaceae	Crocinitomix	unidentified marine bacterioplankton	bASV642	Bacteria	Alphaproteobacteria	SAR11 clade	Clade I	Clade Ia	Unassigned Clade Ia (Genus)	0.0362654	Pos	Prokaryote-Prokaryote
bASV7452	Bacteria	Bacteroidia	Flavobacteriales	Crocinitomicaceae	Crocinitomix	unidentified marine bacterioplankton	bASV669	Bacteria	Alphaproteobacteria	SAR11 clade	Clade I	Clade Ia	Unassigned Clade Ia (Genus)	0.0119871	Pos	Prokaryote-Prokaryote
bASV8494	Bacteria	Deltaproteobacteria	SAR324 clade(Marine group B)	uncultured bacterium HF0010_10I05	uncultured bacterium HF0010_10I05	uncultured bacterium HF0010_10I05	bASV6277	Bacteria	Bacteroidia	Flavobacteriales	Flavobacteriaceae	NS5 marine group	uncultured Flavobacterium sp.	0.199486	Pos	Prokaryote-Prokaryote
bASV8497	Bacteria	Deltaproteobacteria	SAR324 clade(Marine group B)	uncultured bacterium HF0010_10I05	uncultured bacterium HF0010_10I05	uncultured bacterium HF0010_10I05	bASV5016	Bacteria	Bacteroidia	Sphingobacteriales	NS11-12 marine group	uncultured Bacteroidetes bacterium	uncultured Bacteroidetes bacterium	0.342471	Pos	Prokaryote-Prokaryote
bASV8497	Bacteria	Deltaproteobacteria	SAR324 clade(Marine group B)	uncultured bacterium HF0010_10I05	uncultured bacterium HF0010_10I05	uncultured bacterium HF0010_10I05	bASV5017	Bacteria	Bacteroidia	Sphingobacteriales	NS11-12 marine group	uncultured Bacteroidetes bacterium	uncultured Bacteroidetes bacterium	-0.10373	Neg	Prokaryote-Prokaryote
bASV8504	Bacteria	Deltaproteobacteria	SAR324 clade(Marine group B)	uncultured bacterium HF0010_10I05	uncultured bacterium HF0010_10I05	uncultured bacterium HF0010_10I05	bASV644	Bacteria	Alphaproteobacteria	SAR11 clade	Clade I	Clade Ia	Unassigned Clade Ia (Genus)	0.113236	Pos	Prokaryote-Prokaryote
bASV8504	Bacteria	Deltaproteobacteria	SAR324 clade(Marine group B)	uncultured bacterium HF0010_10I05	uncultured bacterium HF0010_10I05	uncultured bacterium HF0010_10I05	bASV6279	Bacteria	Bacteroidia	Flavobacteriales	Flavobacteriaceae	NS5 marine group	uncultured Flavobacterium sp.	0.0479424	Pos	Prokaryote-Prokaryote
bASV8504	Bacteria	Deltaproteobacteria	SAR324 clade(Marine group B)	uncultured bacterium HF0010_10I05	uncultured bacterium HF0010_10I05	uncultured bacterium HF0010_10I05	bASV650	Bacteria	Alphaproteobacteria	SAR11 clade	Clade I	Clade Ia	Unassigned Clade Ia (Genus)	0.0210941	Pos	Prokaryote-Prokaryote
bASV9678	Bacteria	Actinobacteria	Micrococcales	Microbacteriaceae	Candidatus Aquiluna	Unassigned Candidatus Aquiluna (Genus)	bASV7452	Bacteria	Bacteroidia	Flavobacteriales	Crocinitomicaceae	Crocinitomix	unidentified marine bacterioplankton	0.285136	Pos	Prokaryote-Prokaryote
bASV9684	Bacteria	Actinobacteria	Micrococcales	Microbacteriaceae	Candidatus Aquiluna	uncultured bacterium	bASV5899	Bacteria	Bacteroidia	Flavobacteriales	Cryomorphaceae	uncultured	Unassigned uncultured (Genus)	-0.0470626	Neg	Prokaryote-Prokaryote
bASV9684	Bacteria	Actinobacteria	Micrococcales	Microbacteriaceae	Candidatus Aquiluna	uncultured bacterium	bASV9678	Bacteria	Actinobacteria	Micrococcales	Microbacteriaceae	Candidatus Aquiluna	Unassigned Candidatus Aquiluna (Genus)	-0.0846334	Neg	Prokaryote-Prokaryote
bASV9685	Bacteria	Actinobacteria	Micrococcales	Microbacteriaceae	Candidatus Aquiluna	uncultured bacterium	bASV564	Bacteria	Alphaproteobacteria	SAR11 clade	Clade II	Unassigned Clade II (Family)	Unassigned Clade II (Family)	0.130302	Pos	Prokaryote-Prokaryote
bASV9685	Bacteria	Actinobacteria	Micrococcales	Microbacteriaceae	Candidatus Aquiluna	uncultured bacterium	bASV5901	Bacteria	Bacteroidia	Flavobacteriales	Cryomorphaceae	uncultured	Unassigned uncultured (Genus)	0.167124	Pos	Prokaryote-Prokaryote
bASV9685	Bacteria	Actinobacteria	Micrococcales	Microbacteriaceae	Candidatus Aquiluna	uncultured bacterium	bASV8504	Bacteria	Deltaproteobacteria	SAR324 clade(Marine group B)	uncultured bacterium HF0010_10I05	uncultured bacterium HF0010_10I05	uncultured bacterium HF0010_10I05	0.163903	Pos	Prokaryote-Prokaryote
bASV9685	Bacteria	Actinobacteria	Micrococcales	Microbacteriaceae	Candidatus Aquiluna	uncultured bacterium	bASV6279	Bacteria	Bacteroidia	Flavobacteriales	Flavobacteriaceae	NS5 marine group	uncultured Flavobacterium sp.	0.296826	Pos	Prokaryote-Prokaryote
bASV9689	Bacteria	Actinobacteria	Micrococcales	Microbacteriaceae	Candidatus Aquiluna	uncultured bacterium	bASV6204	Bacteria	Bacteroidia	Flavobacteriales	Flavobacteriaceae	NS5 marine group	uncultured Flavobacterium sp.	0.0542804	Pos	Prokaryote-Prokaryote
bASV9689	Bacteria	Actinobacteria	Micrococcales	Microbacteriaceae	Candidatus Aquiluna	uncultured bacterium	bASV5016	Bacteria	Bacteroidia	Sphingobacteriales	NS11-12 marine group	uncultured Bacteroidetes bacterium	uncultured Bacteroidetes bacterium	0.0121111	Pos	Prokaryote-Prokaryote
bASV9689	Bacteria	Actinobacteria	Micrococcales	Microbacteriaceae	Candidatus Aquiluna	uncultured bacterium	bASV7135	Bacteria	Bacteroidia	Flavobacteriales	Flavobacteriaceae	uncultured	Flavobacteriaceae bacterium LE20	0.0467558	Pos	Prokaryote-Prokaryote
bASV9693	Bacteria	Actinobacteria	Micrococcales	Microbacteriaceae	Candidatus Aquiluna	uncultured bacterium	bASV6638	Bacteria	Bacteroidia	Flavobacteriales	Flavobacteriaceae	Formosa	Unassigned Formosa (Genus)	0.145167	Pos	Prokaryote-Prokaryote
bASV9693	Bacteria	Actinobacteria	Micrococcales	Microbacteriaceae	Candidatus Aquiluna	uncultured bacterium	bASV653	Bacteria	Alphaproteobacteria	SAR11 clade	Clade I	Clade Ia	Unassigned Clade Ia (Genus)	0.00462751	Pos	Prokaryote-Prokaryote
bASV9706	Bacteria	Actinobacteria	Micrococcales	Microbacteriaceae	Unassigned Microbacteriaceae (Family)	Unassigned Microbacteriaceae (Family)	bASV6842	Bacteria	Bacteroidia	Flavobacteriales	Flavobacteriaceae	NS3a marine group	Unassigned NS3a marine group (Genus)	0.0389638	Pos	Prokaryote-Prokaryote
bASV9820	Bacteria	Acidimicrobiia	Actinomarinales	Actinomarinaceae	Candidatus Actinomarina	Unassigned Candidatus Actinomarina (Genus)	bASV3593	Archaea	Thermoplasmata	Marine Group II	uncultured marine archaeon DCM3921	uncultured marine archaeon DCM3921	uncultured marine archaeon DCM3921	0.0538714	Pos	Prokaryote-Prokaryote
bASV9820	Bacteria	Acidimicrobiia	Actinomarinales	Actinomarinaceae	Candidatus Actinomarina	Unassigned Candidatus Actinomarina (Genus)	bASV9678	Bacteria	Actinobacteria	Micrococcales	Microbacteriaceae	Candidatus Aquiluna	Unassigned Candidatus Aquiluna (Genus)	0.0210872	Pos	Prokaryote-Prokaryote
bASV9820	Bacteria	Acidimicrobiia	Actinomarinales	Actinomarinaceae	Candidatus Actinomarina	Unassigned Candidatus Actinomarina (Genus)	bASV7034	Bacteria	Bacteroidia	Flavobacteriales	Flavobacteriaceae	uncultured	marine metagenome	0.071091	Pos	Prokaryote-Prokaryote
bASV9823	Bacteria	Acidimicrobiia	Actinomarinales	Actinomarinaceae	Candidatus Actinomarina	Unassigned Candidatus Actinomarina (Genus)	bASV9678	Bacteria	Actinobacteria	Micrococcales	Microbacteriaceae	Candidatus Aquiluna	Unassigned Candidatus Aquiluna (Genus)	-0.0404216	Neg	Prokaryote-Prokaryote
bASV9829	Bacteria	Acidimicrobiia	Actinomarinales	Actinomarinaceae	Candidatus Actinomarina	Unassigned Candidatus Actinomarina (Genus)	bASV6546	Bacteria	Bacteroidia	Flavobacteriales	Flavobacteriaceae	NS4 marine group	Unassigned NS4 marine group (Genus)	0.0950392	Pos	Prokaryote-Prokaryote
bASV9830	Bacteria	Acidimicrobiia	Actinomarinales	Actinomarinaceae	Candidatus Actinomarina	Unassigned Candidatus Actinomarina (Genus)	bASV5017	Bacteria	Bacteroidia	Sphingobacteriales	NS11-12 marine group	uncultured Bacteroidetes bacterium	uncultured Bacteroidetes bacterium	0.095358	Pos	Prokaryote-Prokaryote
bASV9830	Bacteria	Acidimicrobiia	Actinomarinales	Actinomarinaceae	Candidatus Actinomarina	Unassigned Candidatus Actinomarina (Genus)	bASV9823	Bacteria	Acidimicrobiia	Actinomarinales	Actinomarinaceae	Candidatus Actinomarina	Unassigned Candidatus Actinomarina (Genus)	-0.217878	Neg	Prokaryote-Prokaryote
bASV9830	Bacteria	Acidimicrobiia	Actinomarinales	Actinomarinaceae	Candidatus Actinomarina	Unassigned Candidatus Actinomarina (Genus)	bASV5899	Bacteria	Bacteroidia	Flavobacteriales	Cryomorphaceae	uncultured	Unassigned uncultured (Genus)	-0.0367957	Neg	Prokaryote-Prokaryote
bASV9839	Bacteria	Acidimicrobiia	Actinomarinales	Actinomarinaceae	Candidatus Actinomarina	uncultured actinobacterium	bASV646	Bacteria	Alphaproteobacteria	SAR11 clade	Clade I	Clade Ia	Unassigned Clade Ia (Genus)	0.398512	Pos	Prokaryote-Prokaryote
bASV9839	Bacteria	Acidimicrobiia	Actinomarinales	Actinomarinaceae	Candidatus Actinomarina	uncultured actinobacterium	bASV6477	Bacteria	Bacteroidia	Flavobacteriales	Flavobacteriaceae	NS5 marine group	Unassigned NS5 marine group (Genus)	0.142304	Pos	Prokaryote-Prokaryote
bASV9850	Bacteria	Acidimicrobiia	Actinomarinales	Actinomarinaceae	Candidatus Actinomarina	uncultured actinobacterium	bASV6201	Bacteria	Bacteroidia	Flavobacteriales	Flavobacteriaceae	NS5 marine group	uncultured Flavobacterium sp.	0.120854	Pos	Prokaryote-Prokaryote
bASV9850	Bacteria	Acidimicrobiia	Actinomarinales	Actinomarinaceae	Candidatus Actinomarina	uncultured actinobacterium	bASV650	Bacteria	Alphaproteobacteria	SAR11 clade	Clade I	Clade Ia	Unassigned Clade Ia (Genus)	0.209596	Pos	Prokaryote-Prokaryote
bASV9852	Bacteria	Acidimicrobiia	Actinomarinales	Actinomarinaceae	Candidatus Actinomarina	uncultured actinobacterium	bASV6192	Bacteria	Bacteroidia	Flavobacteriales	Flavobacteriaceae	NS5 marine group	uncultured Flavobacterium sp.	0.0142921	Pos	Prokaryote-Prokaryote
bASV9852	Bacteria	Acidimicrobiia	Actinomarinales	Actinomarinaceae	Candidatus Actinomarina	uncultured actinobacterium	bASV545	Bacteria	Alphaproteobacteria	SAR11 clade	Clade II	Unassigned Clade II (Family)	Unassigned Clade II (Family)	0.0705783	Pos	Prokaryote-Prokaryote
bASV9852	Bacteria	Acidimicrobiia	Actinomarinales	Actinomarinaceae	Candidatus Actinomarina	uncultured actinobacterium	bASV3593	Archaea	Thermoplasmata	Marine Group II	uncultured marine archaeon DCM3921	uncultured marine archaeon DCM3921	uncultured marine archaeon DCM3921	0.215157	Pos	Prokaryote-Prokaryote
bASV9880	Bacteria	Acidimicrobiia	Actinomarinales	Actinomarinaceae	Candidatus Actinomarina	Unassigned Candidatus Actinomarina (Genus)	bASV6201	Bacteria	Bacteroidia	Flavobacteriales	Flavobacteriaceae	NS5 marine group	uncultured Flavobacterium sp.	0.0763787	Pos	Prokaryote-Prokaryote
bASV9880	Bacteria	Acidimicrobiia	Actinomarinales	Actinomarinaceae	Candidatus Actinomarina	Unassigned Candidatus Actinomarina (Genus)	bASV9829	Bacteria	Acidimicrobiia	Actinomarinales	Actinomarinaceae	Candidatus Actinomarina	Unassigned Candidatus Actinomarina (Genus)	0.26611	Pos	Prokaryote-Prokaryote
ASV10002	Eukaryota	Dinophyceae	Peridiniales	Unassigned Peridiniales (Order)	Unassigned Peridiniales (Order)	Unassigned Peridiniales (Order)	bASV11706	Bacteria	Alphaproteobacteria	Rhodobacterales	Rhodobacteraceae	HIMB11	Unassigned HIMB11 (Genus)	-0.0254105	Neg	Prokaryote-Protist
ASV10030	Eukaryota	Dinophyceae	Unassigned Dinophyceae (Class)	Unassigned Dinophyceae (Class)	Unassigned Dinophyceae (Class)	Unassigned Dinophyceae (Class)	bASV11872	Bacteria	Alphaproteobacteria	Rhodobacterales	Rhodobacteraceae	Unassigned Rhodobacteraceae (Family)	Unassigned Rhodobacteraceae (Family)	0.190568	Pos	Prokaryote-Protist
ASV10047	Eukaryota	Dinophyceae	Peridiniales	Unassigned Peridiniales (Order)	Unassigned Peridiniales (Order)	Unassigned Peridiniales (Order)	bASV16799	Bacteria	Gammaproteobacteria	SAR86 clade	Unassigned SAR86 clade (Order)	Unassigned SAR86 clade (Order)	Unassigned SAR86 clade (Order)	0.0173116	Pos	Prokaryote-Protist
ASV10047	Eukaryota	Dinophyceae	Peridiniales	Unassigned Peridiniales (Order)	Unassigned Peridiniales (Order)	Unassigned Peridiniales (Order)	bASV642	Bacteria	Alphaproteobacteria	SAR11 clade	Clade I	Clade Ia	Unassigned Clade Ia (Genus)	-0.00798111	Neg	Prokaryote-Protist
ASV10047	Eukaryota	Dinophyceae	Peridiniales	Unassigned Peridiniales (Order)	Unassigned Peridiniales (Order)	Unassigned Peridiniales (Order)	bASV15735	Bacteria	Gammaproteobacteria	Thiomicrospirales	Thioglobaceae	SUP05 cluster	uncultured bacterium	0.0132458	Pos	Prokaryote-Protist
ASV10047	Eukaryota	Dinophyceae	Peridiniales	Unassigned Peridiniales (Order)	Unassigned Peridiniales (Order)	Unassigned Peridiniales (Order)	bASV650	Bacteria	Alphaproteobacteria	SAR11 clade	Clade I	Clade Ia	Unassigned Clade Ia (Genus)	0.0702915	Pos	Prokaryote-Protist
ASV10105	Eukaryota	Dinophyceae	Gymnodiniales	Gymnodiniaceae	Gyrodinium	Unassigned Gyrodinium (Genus)	bASV16774	Bacteria	Gammaproteobacteria	SAR86 clade	Unassigned SAR86 clade (Order)	Unassigned SAR86 clade (Order)	Unassigned SAR86 clade (Order)	0.106297	Pos	Prokaryote-Protist
ASV10105	Eukaryota	Dinophyceae	Gymnodiniales	Gymnodiniaceae	Gyrodinium	Unassigned Gyrodinium (Genus)	bASV11706	Bacteria	Alphaproteobacteria	Rhodobacterales	Rhodobacteraceae	HIMB11	Unassigned HIMB11 (Genus)	0.0252389	Pos	Prokaryote-Protist
ASV10105	Eukaryota	Dinophyceae	Gymnodiniales	Gymnodiniaceae	Gyrodinium	Unassigned Gyrodinium (Genus)	bASV11873	Bacteria	Alphaproteobacteria	Rhodobacterales	Rhodobacteraceae	Unassigned Rhodobacteraceae (Family)	Unassigned Rhodobacteraceae (Family)	0.135979	Pos	Prokaryote-Protist
ASV1024	Eukaryota	Filosa-Thecofilosea	Ebriida	TAGIRI1-lineage	TAGIRI1-lineage_X	TAGIRI1-lineage_X_sp.	bASV7452	Bacteria	Bacteroidia	Flavobacteriales	Crocinitomicaceae	Crocinitomix	unidentified marine bacterioplankton	0.0939793	Pos	Prokaryote-Protist
ASV1027	Eukaryota	Filosa-Thecofilosea	Ebriida	TAGIRI1-lineage	TAGIRI1-lineage_X	TAGIRI1-lineage_X_sp.	bASV6259	Bacteria	Bacteroidia	Flavobacteriales	Flavobacteriaceae	NS5 marine group	Unassigned NS5 marine group (Genus)	0.103007	Pos	Prokaryote-Protist
ASV1075	Eukaryota	Filosa-Thecofilosea	Ebriida	Ebriidae	Ebria	Ebria_tripartita	bASV11627	Bacteria	Alphaproteobacteria	Rhodobacterales	Rhodobacteraceae	Lentibacter	uncultured bacterium	0.397625	Pos	Prokaryote-Protist
ASV1075	Eukaryota	Filosa-Thecofilosea	Ebriida	Ebriidae	Ebria	Ebria_tripartita	bASV9706	Bacteria	Actinobacteria	Micrococcales	Microbacteriaceae	Unassigned Microbacteriaceae (Family)	Unassigned Microbacteriaceae (Family)	0.14503	Pos	Prokaryote-Protist
ASV1075	Eukaryota	Filosa-Thecofilosea	Ebriida	Ebriidae	Ebria	Ebria_tripartita	bASV6638	Bacteria	Bacteroidia	Flavobacteriales	Flavobacteriaceae	Formosa	Unassigned Formosa (Genus)	0.406712	Pos	Prokaryote-Protist
ASV1075	Eukaryota	Filosa-Thecofilosea	Ebriida	Ebriidae	Ebria	Ebria_tripartita	bASV11669	Bacteria	Alphaproteobacteria	Rhodobacterales	Rhodobacteraceae	Litorimicrobium	uncultured alpha proteobacterium	0.129411	Pos	Prokaryote-Protist
ASV1564	Eukaryota	Filosa-Imbricatea	Filosa-Imbricatea_X	Novel-clade-2	Novel-clade-2_X	Novel-clade-2_X_sp.	bASV17222	Bacteria	Gammaproteobacteria	Betaproteobacteriales	Methylophilaceae	OM43 clade	Unassigned OM43 clade (Genus)	-0.00231262	Neg	Prokaryote-Protist
ASV2468	Eukaryota	Bacillariophyta	Bacillariophyta_X	Polar-centric-Mediophyceae	Chaetoceros	Chaetoceros_danicus	bASV3708	Archaea	Thermoplasmata	Marine Group II	marine metagenome	marine metagenome	marine metagenome	-0.0116704	Neg	Prokaryote-Protist
ASV2520	Eukaryota	Bacillariophyta	Bacillariophyta_X	Polar-centric-Mediophyceae	Chaetoceros	Chaetoceros_pumilum	bASV17739	Bacteria	Gammaproteobacteria	Cellvibrionales	Halieaceae	OM60(NOR5) clade	Unassigned OM60(NOR5) clade (Genus)	-0.138707	Neg	Prokaryote-Protist
ASV2545	Eukaryota	Bacillariophyta	Bacillariophyta_X	Polar-centric-Mediophyceae	Chaetoceros	Unassigned Chaetoceros (Genus)	bASV11002	Bacteria	Alphaproteobacteria	Puniceispirillales	SAR116 clade	Candidatus Puniceispirillum	uncultured bacterium	0.00457989	Pos	Prokaryote-Protist
ASV2545	Eukaryota	Bacillariophyta	Bacillariophyta_X	Polar-centric-Mediophyceae	Chaetoceros	Unassigned Chaetoceros (Genus)	bASV11621	Bacteria	Alphaproteobacteria	Rhodobacterales	Rhodobacteraceae	Planktomarina	Unassigned Planktomarina (Genus)	-0.0125296	Neg	Prokaryote-Protist
ASV2562	Eukaryota	Bacillariophyta	Bacillariophyta_X	Polar-centric-Mediophyceae	Chaetoceros	Chaetoceros_elegans	bASV17244	Bacteria	Gammaproteobacteria	Betaproteobacteriales	Methylophilaceae	OM43 clade	Unassigned OM43 clade (Genus)	-0.0160484	Neg	Prokaryote-Protist
ASV2562	Eukaryota	Bacillariophyta	Bacillariophyta_X	Polar-centric-Mediophyceae	Chaetoceros	Chaetoceros_elegans	bASV643	Bacteria	Alphaproteobacteria	SAR11 clade	Clade I	Clade Ia	Unassigned Clade Ia (Genus)	-0.0211757	Neg	Prokaryote-Protist
ASV2579	Eukaryota	Bacillariophyta	Bacillariophyta_X	Polar-centric-Mediophyceae	Chaetoceros	Unassigned Chaetoceros (Genus)	bASV17971	Bacteria	Gammaproteobacteria	OM182 clade	OM182 bacterium D4	OM182 bacterium D4	OM182 bacterium D4	0.130721	Pos	Prokaryote-Protist
ASV2582	Eukaryota	Bacillariophyta	Bacillariophyta_X	Polar-centric-Mediophyceae	Chaetoceros	Chaetoceros_decipiens	bASV6192	Bacteria	Bacteroidia	Flavobacteriales	Flavobacteriaceae	NS5 marine group	uncultured Flavobacterium sp.	-0.0103636	Neg	Prokaryote-Protist
ASV2582	Eukaryota	Bacillariophyta	Bacillariophyta_X	Polar-centric-Mediophyceae	Chaetoceros	Chaetoceros_decipiens	bASV721	Bacteria	Alphaproteobacteria	SAR11 clade	Clade III	Unassigned Clade III (Family)	Unassigned Clade III (Family)	0.0447417	Pos	Prokaryote-Protist
ASV2637	Eukaryota	Bacillariophyta	Bacillariophyta_X	Polar-centric-Mediophyceae	Unassigned Polar-centric-Mediophyceae (Family)	Unassigned Polar-centric-Mediophyceae (Family)	bASV11872	Bacteria	Alphaproteobacteria	Rhodobacterales	Rhodobacteraceae	Unassigned Rhodobacteraceae (Family)	Unassigned Rhodobacteraceae (Family)	0.0616667	Pos	Prokaryote-Protist
ASV2637	Eukaryota	Bacillariophyta	Bacillariophyta_X	Polar-centric-Mediophyceae	Unassigned Polar-centric-Mediophyceae (Family)	Unassigned Polar-centric-Mediophyceae (Family)	bASV6841	Bacteria	Bacteroidia	Flavobacteriales	Flavobacteriaceae	NS3a marine group	Unassigned NS3a marine group (Genus)	-0.0453093	Neg	Prokaryote-Protist
ASV2637	Eukaryota	Bacillariophyta	Bacillariophyta_X	Polar-centric-Mediophyceae	Unassigned Polar-centric-Mediophyceae (Family)	Unassigned Polar-centric-Mediophyceae (Family)	bASV704	Bacteria	Alphaproteobacteria	SAR11 clade	Clade III	Unassigned Clade III (Family)	Unassigned Clade III (Family)	-0.0667083	Neg	Prokaryote-Protist
ASV2700	Eukaryota	Bacillariophyta	Bacillariophyta_X	Radial-centric-basal-Coscinodiscophyceae	Actinocyclus	Actinocyclus_curvatulus	bASV675	Bacteria	Alphaproteobacteria	SAR11 clade	Clade I	Clade Ia	Unassigned Clade Ia (Genus)	-0.151045	Neg	Prokaryote-Protist
ASV2700	Eukaryota	Bacillariophyta	Bacillariophyta_X	Radial-centric-basal-Coscinodiscophyceae	Actinocyclus	Actinocyclus_curvatulus	bASV11669	Bacteria	Alphaproteobacteria	Rhodobacterales	Rhodobacteraceae	Litorimicrobium	uncultured alpha proteobacterium	-0.0192315	Neg	Prokaryote-Protist
ASV2700	Eukaryota	Bacillariophyta	Bacillariophyta_X	Radial-centric-basal-Coscinodiscophyceae	Actinocyclus	Actinocyclus_curvatulus	bASV18264	Bacteria	Gammaproteobacteria	Oceanospirillales	Pseudohongiellaceae	Pseudohongiella	Unassigned Pseudohongiella (Genus)	-0.00716104	Neg	Prokaryote-Protist
ASV2718	Eukaryota	Bacillariophyta	Bacillariophyta_X	Radial-centric-basal-Coscinodiscophyceae	Coscinodiscus	Coscinodiscus_sp.	bASV16749	Bacteria	Gammaproteobacteria	SAR86 clade	Unassigned SAR86 clade (Order)	Unassigned SAR86 clade (Order)	Unassigned SAR86 clade (Order)	-0.017935	Neg	Prokaryote-Protist
ASV2718	Eukaryota	Bacillariophyta	Bacillariophyta_X	Radial-centric-basal-Coscinodiscophyceae	Coscinodiscus	Coscinodiscus_sp.	bASV18264	Bacteria	Gammaproteobacteria	Oceanospirillales	Pseudohongiellaceae	Pseudohongiella	Unassigned Pseudohongiella (Genus)	-0.00977618	Neg	Prokaryote-Protist
ASV2741	Eukaryota	Bacillariophyta	Bacillariophyta_X	Radial-centric-basal-Coscinodiscophyceae	Rhizosolenia	Rhizosolenia_delicatula	bASV6193	Bacteria	Bacteroidia	Flavobacteriales	Flavobacteriaceae	NS5 marine group	uncultured Flavobacterium sp.	-0.127812	Neg	Prokaryote-Protist
ASV2741	Eukaryota	Bacillariophyta	Bacillariophyta_X	Radial-centric-basal-Coscinodiscophyceae	Rhizosolenia	Rhizosolenia_delicatula	bASV11873	Bacteria	Alphaproteobacteria	Rhodobacterales	Rhodobacteraceae	Unassigned Rhodobacteraceae (Family)	Unassigned Rhodobacteraceae (Family)	-0.0201336	Neg	Prokaryote-Protist
ASV2762	Eukaryota	Bacillariophyta	Bacillariophyta_X	Polar-centric-Mediophyceae	Thalassiosira	Thalassiosira_guillardii	bASV9823	Bacteria	Acidimicrobiia	Actinomarinales	Actinomarinaceae	Candidatus Actinomarina	Unassigned Candidatus Actinomarina (Genus)	-0.221648	Neg	Prokaryote-Protist
ASV2772	Eukaryota	Bacillariophyta	Bacillariophyta_X	Polar-centric-Mediophyceae	Cyclotella	Unassigned Cyclotella (Genus)	bASV9820	Bacteria	Acidimicrobiia	Actinomarinales	Actinomarinaceae	Candidatus Actinomarina	Unassigned Candidatus Actinomarina (Genus)	-0.0210711	Neg	Prokaryote-Protist
ASV2778	Eukaryota	Bacillariophyta	Bacillariophyta_X	Polar-centric-Mediophyceae	Cyclotella	Cyclotella_sp.	bASV6225	Bacteria	Bacteroidia	Flavobacteriales	Flavobacteriaceae	NS5 marine group	uncultured Bacteroidetes bacterium	-0.117557	Neg	Prokaryote-Protist
ASV2778	Eukaryota	Bacillariophyta	Bacillariophyta_X	Polar-centric-Mediophyceae	Cyclotella	Cyclotella_sp.	bASV17819	Bacteria	Gammaproteobacteria	Cellvibrionales	Halieaceae	Luminiphilus	uncultured gamma proteobacterium	-0.0017343	Neg	Prokaryote-Protist
ASV2823	Eukaryota	Bacillariophyta	Bacillariophyta_X	Polar-centric-Mediophyceae	Thalassiosira	Unassigned Thalassiosira (Genus)	bASV6204	Bacteria	Bacteroidia	Flavobacteriales	Flavobacteriaceae	NS5 marine group	uncultured Flavobacterium sp.	-0.03708	Neg	Prokaryote-Protist
ASV2823	Eukaryota	Bacillariophyta	Bacillariophyta_X	Polar-centric-Mediophyceae	Thalassiosira	Unassigned Thalassiosira (Genus)	bASV9689	Bacteria	Actinobacteria	Micrococcales	Microbacteriaceae	Candidatus Aquiluna	uncultured bacterium	-0.173308	Neg	Prokaryote-Protist
ASV2826	Eukaryota	Bacillariophyta	Bacillariophyta_X	Polar-centric-Mediophyceae	Unassigned Polar-centric-Mediophyceae (Family)	Unassigned Polar-centric-Mediophyceae (Family)	bASV9706	Bacteria	Actinobacteria	Micrococcales	Microbacteriaceae	Unassigned Microbacteriaceae (Family)	Unassigned Microbacteriaceae (Family)	-0.0530206	Neg	Prokaryote-Protist
ASV2844	Eukaryota	Bacillariophyta	Bacillariophyta_X	Polar-centric-Mediophyceae	Thalassiosira	Unassigned Thalassiosira (Genus)	bASV9823	Bacteria	Acidimicrobiia	Actinomarinales	Actinomarinaceae	Candidatus Actinomarina	Unassigned Candidatus Actinomarina (Genus)	-0.0457115	Neg	Prokaryote-Protist
ASV2849	Eukaryota	Bacillariophyta	Bacillariophyta_X	Polar-centric-Mediophyceae	Thalassiosira	Unassigned Thalassiosira (Genus)	bASV5016	Bacteria	Bacteroidia	Sphingobacteriales	NS11-12 marine group	uncultured Bacteroidetes bacterium	uncultured Bacteroidetes bacterium	-0.0381954	Neg	Prokaryote-Protist
ASV2857	Eukaryota	Bacillariophyta	Bacillariophyta_X	Polar-centric-Mediophyceae	Thalassiosira	Thalassiosira_anguste-lineata	bASV11621	Bacteria	Alphaproteobacteria	Rhodobacterales	Rhodobacteraceae	Planktomarina	Unassigned Planktomarina (Genus)	0.119749	Pos	Prokaryote-Protist
ASV2858	Eukaryota	Bacillariophyta	Bacillariophyta_X	Polar-centric-Mediophyceae	Unassigned Polar-centric-Mediophyceae (Family)	Unassigned Polar-centric-Mediophyceae (Family)	bASV15721	Bacteria	Gammaproteobacteria	Thiomicrospirales	Thioglobaceae	SUP05 cluster	uncultured bacterium	0.147681	Pos	Prokaryote-Protist
ASV2864	Eukaryota	Bacillariophyta	Bacillariophyta_X	Polar-centric-Mediophyceae	Thalassiosira	Unassigned Thalassiosira (Genus)	bASV16759	Bacteria	Gammaproteobacteria	SAR86 clade	Unassigned SAR86 clade (Order)	Unassigned SAR86 clade (Order)	Unassigned SAR86 clade (Order)	-0.0808602	Neg	Prokaryote-Protist
ASV2864	Eukaryota	Bacillariophyta	Bacillariophyta_X	Polar-centric-Mediophyceae	Thalassiosira	Unassigned Thalassiosira (Genus)	bASV11669	Bacteria	Alphaproteobacteria	Rhodobacterales	Rhodobacteraceae	Litorimicrobium	uncultured alpha proteobacterium	-0.0797301	Neg	Prokaryote-Protist
ASV2869	Eukaryota	Bacillariophyta	Bacillariophyta_X	Polar-centric-Mediophyceae	Unassigned Polar-centric-Mediophyceae (Family)	Unassigned Polar-centric-Mediophyceae (Family)	bASV17736	Bacteria	Gammaproteobacteria	Cellvibrionales	Halieaceae	OM60(NOR5) clade	Unassigned OM60(NOR5) clade (Genus)	-0.038601	Neg	Prokaryote-Protist
ASV2880	Eukaryota	Bacillariophyta	Bacillariophyta_X	Polar-centric-Mediophyceae	Thalassiosira	Unassigned Thalassiosira (Genus)	bASV7034	Bacteria	Bacteroidia	Flavobacteriales	Flavobacteriaceae	uncultured	marine metagenome	-0.035905	Neg	Prokaryote-Protist
ASV2880	Eukaryota	Bacillariophyta	Bacillariophyta_X	Polar-centric-Mediophyceae	Thalassiosira	Unassigned Thalassiosira (Genus)	bASV3593	Archaea	Thermoplasmata	Marine Group II	uncultured marine archaeon DCM3921	uncultured marine archaeon DCM3921	uncultured marine archaeon DCM3921	0.000912064	Pos	Prokaryote-Protist
ASV2920	Eukaryota	Bacillariophyta	Bacillariophyta_X	Polar-centric-Mediophyceae	Skeletonema	Skeletonema_sp.	bASV5899	Bacteria	Bacteroidia	Flavobacteriales	Cryomorphaceae	uncultured	Unassigned uncultured (Genus)	0.0220679	Pos	Prokaryote-Protist
ASV3507	Eukaryota	MAST-1	MAST-1C	MAST-1C_X	MAST-1C_XX	MAST-1C_XX_sp.	bASV10806	Bacteria	Alphaproteobacteria	Puniceispirillales	SAR116 clade	Unassigned SAR116 clade (Family)	Unassigned SAR116 clade (Family)	0.0198552	Pos	Prokaryote-Protist
ASV3507	Eukaryota	MAST-1	MAST-1C	MAST-1C_X	MAST-1C_XX	MAST-1C_XX_sp.	bASV15493	Bacteria	Gammaproteobacteria	Cellvibrionales	Porticoccaceae	SAR92 clade	Unassigned SAR92 clade (Genus)	0.0219181	Pos	Prokaryote-Protist
ASV3537	Eukaryota	MAST-6	MAST-6_X	MAST-6_XX	MAST-6_XXX	MAST-6_XXX_sp.	bASV11859	Bacteria	Alphaproteobacteria	Rhodobacterales	Rhodobacteraceae	Ascidiaceihabitans	Unassigned Ascidiaceihabitans (Genus)	0.00250161	Pos	Prokaryote-Protist
ASV3540	Eukaryota	MAST-6	MAST-6_X	MAST-6_XX	MAST-6_XXX	MAST-6_XXX_sp.	bASV9830	Bacteria	Acidimicrobiia	Actinomarinales	Actinomarinaceae	Candidatus Actinomarina	Unassigned Candidatus Actinomarina (Genus)	-0.0106732	Neg	Prokaryote-Protist
ASV3544	Eukaryota	MAST-6	MAST-6_X	MAST-6_XX	MAST-6_XXX	MAST-6_XXX_sp.	bASV11873	Bacteria	Alphaproteobacteria	Rhodobacterales	Rhodobacteraceae	Unassigned Rhodobacteraceae (Family)	Unassigned Rhodobacteraceae (Family)	0.046477	Pos	Prokaryote-Protist
ASV3544	Eukaryota	MAST-6	MAST-6_X	MAST-6_XX	MAST-6_XXX	MAST-6_XXX_sp.	bASV16721	Bacteria	Gammaproteobacteria	SAR86 clade	uncultured gamma proteobacterium	uncultured gamma proteobacterium	uncultured gamma proteobacterium	-0.0333884	Neg	Prokaryote-Protist
ASV3544	Eukaryota	MAST-6	MAST-6_X	MAST-6_XX	MAST-6_XXX	MAST-6_XXX_sp.	bASV5901	Bacteria	Bacteroidia	Flavobacteriales	Cryomorphaceae	uncultured	Unassigned uncultured (Genus)	-0.0119928	Neg	Prokaryote-Protist
ASV3544	Eukaryota	MAST-6	MAST-6_X	MAST-6_XX	MAST-6_XXX	MAST-6_XXX_sp.	bASV6192	Bacteria	Bacteroidia	Flavobacteriales	Flavobacteriaceae	NS5 marine group	uncultured Flavobacterium sp.	0.017977	Pos	Prokaryote-Protist
ASV3544	Eukaryota	MAST-6	MAST-6_X	MAST-6_XX	MAST-6_XXX	MAST-6_XXX_sp.	bASV6285	Bacteria	Bacteroidia	Flavobacteriales	Flavobacteriaceae	NS5 marine group	uncultured Flavobacterium sp.	0.0166158	Pos	Prokaryote-Protist
ASV3546	Eukaryota	MAST-6	MAST-6_X	MAST-6_XX	MAST-6_XXX	MAST-6_XXX_sp.	bASV11708	Bacteria	Alphaproteobacteria	Rhodobacterales	Rhodobacteraceae	HIMB11	Unassigned HIMB11 (Genus)	0.219003	Pos	Prokaryote-Protist
ASV3761	Eukaryota	Bacillariophyta	Bacillariophyta_X	Polar-centric-Mediophyceae	Chaetoceros	Unassigned Chaetoceros (Genus)	bASV6791	Bacteria	Bacteroidia	Flavobacteriales	Flavobacteriaceae	Aureimarina	Unassigned Aureimarina (Genus)	0.0586708	Pos	Prokaryote-Protist
ASV4087	Eukaryota	Picozoa_X	Picozoa_XX	Picozoa_XXX	Picozoa_XXXX	Picozoa_XXXX_sp.	bASV6225	Bacteria	Bacteroidia	Flavobacteriales	Flavobacteriaceae	NS5 marine group	uncultured Bacteroidetes bacterium	-0.126308	Neg	Prokaryote-Protist
ASV4087	Eukaryota	Picozoa_X	Picozoa_XX	Picozoa_XXX	Picozoa_XXXX	Picozoa_XXXX_sp.	bASV7034	Bacteria	Bacteroidia	Flavobacteriales	Flavobacteriaceae	uncultured	marine metagenome	-0.117968	Neg	Prokaryote-Protist
ASV4087	Eukaryota	Picozoa_X	Picozoa_XX	Picozoa_XXX	Picozoa_XXXX	Picozoa_XXXX_sp.	bASV647	Bacteria	Alphaproteobacteria	SAR11 clade	Clade I	Clade Ia	Unassigned Clade Ia (Genus)	-0.0145346	Neg	Prokaryote-Protist
ASV4675	Eukaryota	Acantharea	Arthracanthida-Symphyacanthida	Arthracanthida-Symphyacanthida_X	Unassigned Arthracanthida-Symphyacanthida_X (Family)	Unassigned Arthracanthida-Symphyacanthida_X (Family)	bASV15721	Bacteria	Gammaproteobacteria	Thiomicrospirales	Thioglobaceae	SUP05 cluster	uncultured bacterium	0.213179	Pos	Prokaryote-Protist
ASV4816	Eukaryota	Prymnesiophyceae	Prymnesiales	Chrysochromulinaceae	Chrysochromulina	Chrysochromulina_sp.	bASV18264	Bacteria	Gammaproteobacteria	Oceanospirillales	Pseudohongiellaceae	Pseudohongiella	Unassigned Pseudohongiella (Genus)	-0.123484	Neg	Prokaryote-Protist
ASV4816	Eukaryota	Prymnesiophyceae	Prymnesiales	Chrysochromulinaceae	Chrysochromulina	Chrysochromulina_sp.	bASV15715	Bacteria	Gammaproteobacteria	Thiomicrospirales	Thioglobaceae	SUP05 cluster	uncultured bacterium	-0.0424414	Neg	Prokaryote-Protist
ASV4816	Eukaryota	Prymnesiophyceae	Prymnesiales	Chrysochromulinaceae	Chrysochromulina	Chrysochromulina_sp.	bASV655	Bacteria	Alphaproteobacteria	SAR11 clade	Clade I	Clade Ia	Unassigned Clade Ia (Genus)	-0.0367975	Neg	Prokaryote-Protist
ASV4819	Eukaryota	Prymnesiophyceae	Prymnesiales	Chrysochromulinaceae	Chrysochromulina	Chrysochromulina_sp.	bASV11664	Bacteria	Alphaproteobacteria	Rhodobacterales	Rhodobacteraceae	Litorimicrobium	uncultured alpha proteobacterium	-0.206778	Neg	Prokaryote-Protist
ASV4819	Eukaryota	Prymnesiophyceae	Prymnesiales	Chrysochromulinaceae	Chrysochromulina	Chrysochromulina_sp.	bASV648	Bacteria	Alphaproteobacteria	SAR11 clade	Clade I	Clade Ia	Unassigned Clade Ia (Genus)	-0.0908186	Neg	Prokaryote-Protist
ASV4819	Eukaryota	Prymnesiophyceae	Prymnesiales	Chrysochromulinaceae	Chrysochromulina	Chrysochromulina_sp.	bASV17819	Bacteria	Gammaproteobacteria	Cellvibrionales	Halieaceae	Luminiphilus	uncultured gamma proteobacterium	-0.024304	Neg	Prokaryote-Protist
ASV4819	Eukaryota	Prymnesiophyceae	Prymnesiales	Chrysochromulinaceae	Chrysochromulina	Chrysochromulina_sp.	bASV6842	Bacteria	Bacteroidia	Flavobacteriales	Flavobacteriaceae	NS3a marine group	Unassigned NS3a marine group (Genus)	-0.368778	Neg	Prokaryote-Protist
ASV515	Eukaryota	Filosa-Imbricatea	Filosa-Imbricatea_X	Filosa-Imbricatea_XX	Filosa-Imbricatea_XXX	Filosa-Imbricatea_XXX_sp.	bASV6841	Bacteria	Bacteroidia	Flavobacteriales	Flavobacteriaceae	NS3a marine group	Unassigned NS3a marine group (Genus)	0.0438736	Pos	Prokaryote-Protist
ASV515	Eukaryota	Filosa-Imbricatea	Filosa-Imbricatea_X	Filosa-Imbricatea_XX	Filosa-Imbricatea_XXX	Filosa-Imbricatea_XXX_sp.	bASV7452	Bacteria	Bacteroidia	Flavobacteriales	Crocinitomicaceae	Crocinitomix	unidentified marine bacterioplankton	0.116655	Pos	Prokaryote-Protist
ASV515	Eukaryota	Filosa-Imbricatea	Filosa-Imbricatea_X	Filosa-Imbricatea_XX	Filosa-Imbricatea_XXX	Filosa-Imbricatea_XXX_sp.	bASV11620	Bacteria	Alphaproteobacteria	Rhodobacterales	Rhodobacteraceae	Planktomarina	Unassigned Planktomarina (Genus)	0.0345171	Pos	Prokaryote-Protist
ASV515	Eukaryota	Filosa-Imbricatea	Filosa-Imbricatea_X	Filosa-Imbricatea_XX	Filosa-Imbricatea_XXX	Filosa-Imbricatea_XXX_sp.	bASV642	Bacteria	Alphaproteobacteria	SAR11 clade	Clade I	Clade Ia	Unassigned Clade Ia (Genus)	0.0758957	Pos	Prokaryote-Protist
ASV6274	Eukaryota	Telonemia_X	Telonemia_XX	Telonemia-Group-1	Telonemia-Group-1_X	Telonemia-Group-1_X_sp.	bASV3708	Archaea	Thermoplasmata	Marine Group II	marine metagenome	marine metagenome	marine metagenome	0.0156001	Pos	Prokaryote-Protist
ASV63	Eukaryota	Bacillariophyta	Bacillariophyta_X	Radial-centric-basal-Coscinodiscophyceae	Corethron	Corethron_hystrix	bASV18269	Bacteria	Gammaproteobacteria	Oceanospirillales	Pseudohongiellaceae	Pseudohongiella	Unassigned Pseudohongiella (Genus)	-0.0122598	Neg	Prokaryote-Protist
ASV6398	Eukaryota	Katablepharidaceae	Katablepharidales	Katablepharidales_X	Leucocryptos	Leucocryptos_marina	bASV15715	Bacteria	Gammaproteobacteria	Thiomicrospirales	Thioglobaceae	SUP05 cluster	uncultured bacterium	-0.0695022	Neg	Prokaryote-Protist
ASV6406	Eukaryota	Katablepharidaceae	Katablepharidales	Katablepharidales_X	Katablepharidales_XX	Katablepharidales_XX_sp.	bASV6285	Bacteria	Bacteroidia	Flavobacteriales	Flavobacteriaceae	NS5 marine group	uncultured Flavobacterium sp.	-0.104227	Neg	Prokaryote-Protist
ASV6452	Eukaryota	Cryptophyceae	Cryptomonadales	Cryptomonadales_X	Cryptomonadales_XX	Cryptomonadales_XX_sp.	bASV11681	Bacteria	Alphaproteobacteria	Rhodobacterales	Rhodobacteraceae	Unassigned Rhodobacteraceae (Family)	Unassigned Rhodobacteraceae (Family)	0.0202039	Pos	Prokaryote-Protist
ASV6452	Eukaryota	Cryptophyceae	Cryptomonadales	Cryptomonadales_X	Cryptomonadales_XX	Cryptomonadales_XX_sp.	bASV6204	Bacteria	Bacteroidia	Flavobacteriales	Flavobacteriaceae	NS5 marine group	uncultured Flavobacterium sp.	-0.0190061	Neg	Prokaryote-Protist
ASV6453	Eukaryota	Cryptophyceae	Cryptomonadales	Cryptomonadales_X	Plagioselmis	Plagioselmis_prolonga	bASV6791	Bacteria	Bacteroidia	Flavobacteriales	Flavobacteriaceae	Aureimarina	Unassigned Aureimarina (Genus)	-0.0278806	Neg	Prokaryote-Protist
ASV6486	Eukaryota	Cryptophyceae	Cryptomonadales	Cryptomonadales_X	Falcomonas	Falcomonas_daucoides	bASV11620	Bacteria	Alphaproteobacteria	Rhodobacterales	Rhodobacteraceae	Planktomarina	Unassigned Planktomarina (Genus)	-0.0428461	Neg	Prokaryote-Protist
ASV6486	Eukaryota	Cryptophyceae	Cryptomonadales	Cryptomonadales_X	Falcomonas	Falcomonas_daucoides	bASV11464	Bacteria	Alphaproteobacteria	Rhodospirillales	AEGEAN-169 marine group	Unassigned AEGEAN-169 marine group (Family)	Unassigned AEGEAN-169 marine group (Family)	0.0930627	Pos	Prokaryote-Protist
ASV6486	Eukaryota	Cryptophyceae	Cryptomonadales	Cryptomonadales_X	Falcomonas	Falcomonas_daucoides	bASV17244	Bacteria	Gammaproteobacteria	Betaproteobacteriales	Methylophilaceae	OM43 clade	Unassigned OM43 clade (Genus)	0.170849	Pos	Prokaryote-Protist
ASV6512	Eukaryota	Cryptophyceae	Cryptomonadales	Cryptomonadales_X	Teleaulax	Unassigned Teleaulax (Genus)	bASV9830	Bacteria	Acidimicrobiia	Actinomarinales	Actinomarinaceae	Candidatus Actinomarina	Unassigned Candidatus Actinomarina (Genus)	0.0796541	Pos	Prokaryote-Protist
ASV6517	Eukaryota	Cryptophyceae	Cryptomonadales	Cryptomonadales_X	Teleaulax	Teleaulax_sp.	bASV17224	Bacteria	Gammaproteobacteria	Betaproteobacteriales	Methylophilaceae	OM43 clade	Unassigned OM43 clade (Genus)	-0.0174181	Neg	Prokaryote-Protist
ASV6517	Eukaryota	Cryptophyceae	Cryptomonadales	Cryptomonadales_X	Teleaulax	Teleaulax_sp.	bASV9830	Bacteria	Acidimicrobiia	Actinomarinales	Actinomarinaceae	Candidatus Actinomarina	Unassigned Candidatus Actinomarina (Genus)	0.0305579	Pos	Prokaryote-Protist
ASV6518	Eukaryota	Cryptophyceae	Cryptomonadales	Cryptomonadales_X	Teleaulax	Unassigned Teleaulax (Genus)	bASV6841	Bacteria	Bacteroidia	Flavobacteriales	Flavobacteriaceae	NS3a marine group	Unassigned NS3a marine group (Genus)	-0.024964	Neg	Prokaryote-Protist
ASV6518	Eukaryota	Cryptophyceae	Cryptomonadales	Cryptomonadales_X	Teleaulax	Unassigned Teleaulax (Genus)	bASV17232	Bacteria	Gammaproteobacteria	Betaproteobacteriales	Methylophilaceae	OM43 clade	Unassigned OM43 clade (Genus)	0.0127691	Pos	Prokaryote-Protist
ASV6518	Eukaryota	Cryptophyceae	Cryptomonadales	Cryptomonadales_X	Teleaulax	Unassigned Teleaulax (Genus)	bASV9830	Bacteria	Acidimicrobiia	Actinomarinales	Actinomarinaceae	Candidatus Actinomarina	Unassigned Candidatus Actinomarina (Genus)	0.00105527	Pos	Prokaryote-Protist
ASV6521	Eukaryota	Cryptophyceae	Cryptomonadales	Cryptomonadales_X	Teleaulax	Unassigned Teleaulax (Genus)	bASV15719	Bacteria	Gammaproteobacteria	Thiomicrospirales	Thioglobaceae	SUP05 cluster	uncultured bacterium	0.313103	Pos	Prokaryote-Protist
ASV6521	Eukaryota	Cryptophyceae	Cryptomonadales	Cryptomonadales_X	Teleaulax	Unassigned Teleaulax (Genus)	bASV15735	Bacteria	Gammaproteobacteria	Thiomicrospirales	Thioglobaceae	SUP05 cluster	uncultured bacterium	0.149238	Pos	Prokaryote-Protist
ASV6521	Eukaryota	Cryptophyceae	Cryptomonadales	Cryptomonadales_X	Teleaulax	Unassigned Teleaulax (Genus)	bASV661	Bacteria	Alphaproteobacteria	SAR11 clade	Clade I	Clade Ia	Unassigned Clade Ia (Genus)	0.0758106	Pos	Prokaryote-Protist
ASV6521	Eukaryota	Cryptophyceae	Cryptomonadales	Cryptomonadales_X	Teleaulax	Unassigned Teleaulax (Genus)	bASV9880	Bacteria	Acidimicrobiia	Actinomarinales	Actinomarinaceae	Candidatus Actinomarina	Unassigned Candidatus Actinomarina (Genus)	0.183404	Pos	Prokaryote-Protist
ASV6521	Eukaryota	Cryptophyceae	Cryptomonadales	Cryptomonadales_X	Teleaulax	Unassigned Teleaulax (Genus)	bASV8507	Bacteria	Deltaproteobacteria	SAR324 clade(Marine group B)	uncultured bacterium HF0010_10I05	uncultured bacterium HF0010_10I05	uncultured bacterium HF0010_10I05	0.0854165	Pos	Prokaryote-Protist
ASV6521	Eukaryota	Cryptophyceae	Cryptomonadales	Cryptomonadales_X	Teleaulax	Unassigned Teleaulax (Genus)	bASV6547	Bacteria	Bacteroidia	Flavobacteriales	Flavobacteriaceae	NS4 marine group	Unassigned NS4 marine group (Genus)	0.0738376	Pos	Prokaryote-Protist
ASV6521	Eukaryota	Cryptophyceae	Cryptomonadales	Cryptomonadales_X	Teleaulax	Unassigned Teleaulax (Genus)	bASV9829	Bacteria	Acidimicrobiia	Actinomarinales	Actinomarinaceae	Candidatus Actinomarina	Unassigned Candidatus Actinomarina (Genus)	0.25278	Pos	Prokaryote-Protist
ASV6524	Eukaryota	Cryptophyceae	Cryptomonadales	Cryptomonadales_X	Teleaulax	Unassigned Teleaulax (Genus)	bASV10806	Bacteria	Alphaproteobacteria	Puniceispirillales	SAR116 clade	Unassigned SAR116 clade (Family)	Unassigned SAR116 clade (Family)	-0.0258938	Neg	Prokaryote-Protist
ASV6524	Eukaryota	Cryptophyceae	Cryptomonadales	Cryptomonadales_X	Teleaulax	Unassigned Teleaulax (Genus)	bASV15719	Bacteria	Gammaproteobacteria	Thiomicrospirales	Thioglobaceae	SUP05 cluster	uncultured bacterium	-0.00636258	Neg	Prokaryote-Protist
ASV6926	Eukaryota	Pyramimonadales	Pyramimonadales_X	Pyramimonadales_XX	Unassigned Pyramimonadales_XX (Family)	Unassigned Pyramimonadales_XX (Family)	bASV11621	Bacteria	Alphaproteobacteria	Rhodobacterales	Rhodobacteraceae	Planktomarina	Unassigned Planktomarina (Genus)	-0.0425616	Neg	Prokaryote-Protist
ASV6993	Eukaryota	Mamiellophyceae	Mamiellales	Mamiellaceae	Micromonas	Micromonas_bravo_B1	bASV11924	Bacteria	Alphaproteobacteria	Rhodobacterales	Rhodobacteraceae	Unassigned Rhodobacteraceae (Family)	Unassigned Rhodobacteraceae (Family)	0.0189357	Pos	Prokaryote-Protist
ASV6993	Eukaryota	Mamiellophyceae	Mamiellales	Mamiellaceae	Micromonas	Micromonas_bravo_B1	bASV11873	Bacteria	Alphaproteobacteria	Rhodobacterales	Rhodobacteraceae	Unassigned Rhodobacteraceae (Family)	Unassigned Rhodobacteraceae (Family)	0.0305702	Pos	Prokaryote-Protist
ASV6994	Eukaryota	Mamiellophyceae	Mamiellales	Mamiellaceae	Micromonas	Micromonas_bravo_B1	bASV17224	Bacteria	Gammaproteobacteria	Betaproteobacteriales	Methylophilaceae	OM43 clade	Unassigned OM43 clade (Genus)	0.1733	Pos	Prokaryote-Protist
ASV6994	Eukaryota	Mamiellophyceae	Mamiellales	Mamiellaceae	Micromonas	Micromonas_bravo_B1	bASV9874	Bacteria	Acidimicrobiia	Actinomarinales	Actinomarinaceae	Candidatus Actinomarina	Unassigned Candidatus Actinomarina (Genus)	-0.145544	Neg	Prokaryote-Protist
ASV6997	Eukaryota	Mamiellophyceae	Mamiellales	Bathycoccaceae	Bathycoccus	Bathycoccus_prasinos	bASV5017	Bacteria	Bacteroidia	Sphingobacteriales	NS11-12 marine group	uncultured Bacteroidetes bacterium	uncultured Bacteroidetes bacterium	0.0689767	Pos	Prokaryote-Protist
ASV6997	Eukaryota	Mamiellophyceae	Mamiellales	Bathycoccaceae	Bathycoccus	Bathycoccus_prasinos	bASV16796	Bacteria	Gammaproteobacteria	SAR86 clade	Unassigned SAR86 clade (Order)	Unassigned SAR86 clade (Order)	Unassigned SAR86 clade (Order)	0.0336315	Pos	Prokaryote-Protist
ASV6997	Eukaryota	Mamiellophyceae	Mamiellales	Bathycoccaceae	Bathycoccus	Bathycoccus_prasinos	bASV17819	Bacteria	Gammaproteobacteria	Cellvibrionales	Halieaceae	Luminiphilus	uncultured gamma proteobacterium	-0.0122746	Neg	Prokaryote-Protist
ASV7005	Eukaryota	Mamiellophyceae	Mamiellales	Bathycoccaceae	Ostreococcus	Ostreococcus_mediterraneus	bASV6204	Bacteria	Bacteroidia	Flavobacteriales	Flavobacteriaceae	NS5 marine group	uncultured Flavobacterium sp.	0.00664623	Pos	Prokaryote-Protist
ASV7005	Eukaryota	Mamiellophyceae	Mamiellales	Bathycoccaceae	Ostreococcus	Ostreococcus_mediterraneus	bASV9852	Bacteria	Acidimicrobiia	Actinomarinales	Actinomarinaceae	Candidatus Actinomarina	uncultured actinobacterium	0.05102	Pos	Prokaryote-Protist
ASV7005	Eukaryota	Mamiellophyceae	Mamiellales	Bathycoccaceae	Ostreococcus	Ostreococcus_mediterraneus	bASV11443	Bacteria	Alphaproteobacteria	Rhodospirillales	AEGEAN-169 marine group	Unassigned AEGEAN-169 marine group (Family)	Unassigned AEGEAN-169 marine group (Family)	0.128701	Pos	Prokaryote-Protist
ASV7008	Eukaryota	Mamiellophyceae	Mamiellales	Bathycoccaceae	Ostreococcus	Ostreococcus_lucimarinus	bASV17224	Bacteria	Gammaproteobacteria	Betaproteobacteriales	Methylophilaceae	OM43 clade	Unassigned OM43 clade (Genus)	0.00543143	Pos	Prokaryote-Protist
ASV7008	Eukaryota	Mamiellophyceae	Mamiellales	Bathycoccaceae	Ostreococcus	Ostreococcus_lucimarinus	bASV17244	Bacteria	Gammaproteobacteria	Betaproteobacteriales	Methylophilaceae	OM43 clade	Unassigned OM43 clade (Genus)	-0.162473	Neg	Prokaryote-Protist
ASV7010	Eukaryota	Mamiellophyceae	Mamiellales	Bathycoccaceae	Ostreococcus	Unassigned Ostreococcus (Genus)	bASV11621	Bacteria	Alphaproteobacteria	Rhodobacterales	Rhodobacteraceae	Planktomarina	Unassigned Planktomarina (Genus)	-0.154508	Neg	Prokaryote-Protist
ASV7011	Eukaryota	Mamiellophyceae	Mamiellales	Bathycoccaceae	Ostreococcus	Ostreococcus_clade_B	bASV9823	Bacteria	Acidimicrobiia	Actinomarinales	Actinomarinaceae	Candidatus Actinomarina	Unassigned Candidatus Actinomarina (Genus)	0.0769743	Pos	Prokaryote-Protist
ASV7089	Eukaryota	Pedinophyceae	Marsupiomonadales	Marsupiomonadaceae	Marsupiomonas	Unassigned Marsupiomonas (Genus)	bASV11706	Bacteria	Alphaproteobacteria	Rhodobacterales	Rhodobacteraceae	HIMB11	Unassigned HIMB11 (Genus)	0.0253592	Pos	Prokaryote-Protist
ASV7179	Eukaryota	Unassigned Fungi (Division)	Unassigned Fungi (Division)	Unassigned Fungi (Division)	Unassigned Fungi (Division)	Unassigned Fungi (Division)	bASV16734	Bacteria	Gammaproteobacteria	SAR86 clade	Unassigned SAR86 clade (Order)	Unassigned SAR86 clade (Order)	Unassigned SAR86 clade (Order)	-0.100299	Neg	Prokaryote-Protist
ASV7179	Eukaryota	Unassigned Fungi (Division)	Unassigned Fungi (Division)	Unassigned Fungi (Division)	Unassigned Fungi (Division)	Unassigned Fungi (Division)	bASV16783	Bacteria	Gammaproteobacteria	SAR86 clade	Unassigned SAR86 clade (Order)	Unassigned SAR86 clade (Order)	Unassigned SAR86 clade (Order)	0.121897	Pos	Prokaryote-Protist
ASV7181	Eukaryota	Unassigned Fungi (Division)	Unassigned Fungi (Division)	Unassigned Fungi (Division)	Unassigned Fungi (Division)	Unassigned Fungi (Division)	bASV15493	Bacteria	Gammaproteobacteria	Cellvibrionales	Porticoccaceae	SAR92 clade	Unassigned SAR92 clade (Genus)	-0.0059945	Neg	Prokaryote-Protist
ASV7194	Eukaryota	Fungi_X	Fungi_XX	Fungi_XXX	Fungi_XXXX	Fungi_XXXX_sp.	bASV17044	Bacteria	Gammaproteobacteria	Betaproteobacteriales	Burkholderiaceae	RS62 marine group	uncultured bacterium	-0.0468603	Neg	Prokaryote-Protist
ASV7194	Eukaryota	Fungi_X	Fungi_XX	Fungi_XXX	Fungi_XXXX	Fungi_XXXX_sp.	bASV15493	Bacteria	Gammaproteobacteria	Cellvibrionales	Porticoccaceae	SAR92 clade	Unassigned SAR92 clade (Genus)	-0.299271	Neg	Prokaryote-Protist
ASV7234	Eukaryota	Bacillariophyta	Bacillariophyta_X	Polar-centric-Mediophyceae	Chaetoceros	Chaetoceros_debilis_3	bASV17971	Bacteria	Gammaproteobacteria	OM182 clade	OM182 bacterium D4	OM182 bacterium D4	OM182 bacterium D4	0.00913214	Pos	Prokaryote-Protist
ASV7676	Eukaryota	Spirotrichea	Strombidiida	Strombidiidae_R	Strombidium_R	Strombidium_R_sp.	bASV9839	Bacteria	Acidimicrobiia	Actinomarinales	Actinomarinaceae	Candidatus Actinomarina	uncultured actinobacterium	-0.0435469	Neg	Prokaryote-Protist
ASV7676	Eukaryota	Spirotrichea	Strombidiida	Strombidiidae_R	Strombidium_R	Strombidium_R_sp.	bASV8504	Bacteria	Deltaproteobacteria	SAR324 clade(Marine group B)	uncultured bacterium HF0010_10I05	uncultured bacterium HF0010_10I05	uncultured bacterium HF0010_10I05	-0.012132	Neg	Prokaryote-Protist
ASV7676	Eukaryota	Spirotrichea	Strombidiida	Strombidiidae_R	Strombidium_R	Strombidium_R_sp.	bASV704	Bacteria	Alphaproteobacteria	SAR11 clade	Clade III	Unassigned Clade III (Family)	Unassigned Clade III (Family)	0.00683481	Pos	Prokaryote-Protist
ASV7676	Eukaryota	Spirotrichea	Strombidiida	Strombidiidae_R	Strombidium_R	Strombidium_R_sp.	bASV646	Bacteria	Alphaproteobacteria	SAR11 clade	Clade I	Clade Ia	Unassigned Clade Ia (Genus)	-0.00887039	Neg	Prokaryote-Protist
ASV7676	Eukaryota	Spirotrichea	Strombidiida	Strombidiidae_R	Strombidium_R	Strombidium_R_sp.	bASV12442	Bacteria	Alphaproteobacteria	Puniceispirillales	uncultured	Unassigned uncultured (Family)	Unassigned uncultured (Family)	-0.0114702	Neg	Prokaryote-Protist
ASV7678	Eukaryota	Spirotrichea	Strombidiida	Strombidiidae_R	Strombidium_R	Strombidium_R_sp.	bASV8494	Bacteria	Deltaproteobacteria	SAR324 clade(Marine group B)	uncultured bacterium HF0010_10I05	uncultured bacterium HF0010_10I05	uncultured bacterium HF0010_10I05	-0.0964742	Neg	Prokaryote-Protist
ASV7678	Eukaryota	Spirotrichea	Strombidiida	Strombidiidae_R	Strombidium_R	Strombidium_R_sp.	bASV7034	Bacteria	Bacteroidia	Flavobacteriales	Flavobacteriaceae	uncultured	marine metagenome	0.139694	Pos	Prokaryote-Protist
ASV7722	Eukaryota	Spirotrichea	Strombidiida	Strombidiidae_K	Strombidium_K	Strombidium_capitatum	bASV11706	Bacteria	Alphaproteobacteria	Rhodobacterales	Rhodobacteraceae	HIMB11	Unassigned HIMB11 (Genus)	0.234174	Pos	Prokaryote-Protist
ASV7726	Eukaryota	Spirotrichea	Strombidiida	Strombidiidae_K	Strombidium_K	Strombidium_K_sp.	bASV9874	Bacteria	Acidimicrobiia	Actinomarinales	Actinomarinaceae	Candidatus Actinomarina	Unassigned Candidatus Actinomarina (Genus)	0.0566934	Pos	Prokaryote-Protist
ASV7726	Eukaryota	Spirotrichea	Strombidiida	Strombidiidae_K	Strombidium_K	Strombidium_K_sp.	bASV16796	Bacteria	Gammaproteobacteria	SAR86 clade	Unassigned SAR86 clade (Order)	Unassigned SAR86 clade (Order)	Unassigned SAR86 clade (Order)	0.0108349	Pos	Prokaryote-Protist
ASV7726	Eukaryota	Spirotrichea	Strombidiida	Strombidiidae_K	Strombidium_K	Strombidium_K_sp.	bASV15721	Bacteria	Gammaproteobacteria	Thiomicrospirales	Thioglobaceae	SUP05 cluster	uncultured bacterium	0.00431359	Pos	Prokaryote-Protist
ASV7744	Eukaryota	Spirotrichea	Strombidiida	Strombidiidae	Spirostrombidium	Spirostrombidium_agathae	bASV11855	Bacteria	Alphaproteobacteria	Rhodobacterales	Rhodobacteraceae	Ascidiaceihabitans	Unassigned Ascidiaceihabitans (Genus)	0.0721755	Pos	Prokaryote-Protist
ASV7744	Eukaryota	Spirotrichea	Strombidiida	Strombidiidae	Spirostrombidium	Spirostrombidium_agathae	bASV12437	Bacteria	Alphaproteobacteria	Puniceispirillales	uncultured	Unassigned uncultured (Family)	Unassigned uncultured (Family)	0.115829	Pos	Prokaryote-Protist
ASV7770	Eukaryota	Spirotrichea	Strombidiida	Strombidiidae_M	Strombidium_M	Strombidium_M_sp.	bASV12442	Bacteria	Alphaproteobacteria	Puniceispirillales	uncultured	Unassigned uncultured (Family)	Unassigned uncultured (Family)	0.00951086	Pos	Prokaryote-Protist
ASV7770	Eukaryota	Spirotrichea	Strombidiida	Strombidiidae_M	Strombidium_M	Strombidium_M_sp.	bASV6259	Bacteria	Bacteroidia	Flavobacteriales	Flavobacteriaceae	NS5 marine group	Unassigned NS5 marine group (Genus)	-0.124471	Neg	Prokaryote-Protist
ASV7793	Eukaryota	Spirotrichea	Strombidiida_B	Strombidiida_B_X	Strombidiida_B_XX	Strombidiida_B_XX_sp.	bASV10990	Bacteria	Alphaproteobacteria	Puniceispirillales	SAR116 clade	Candidatus Puniceispirillum	uncultured bacterium	-0.0824321	Neg	Prokaryote-Protist
ASV7793	Eukaryota	Spirotrichea	Strombidiida_B	Strombidiida_B_X	Strombidiida_B_XX	Strombidiida_B_XX_sp.	bASV16783	Bacteria	Gammaproteobacteria	SAR86 clade	Unassigned SAR86 clade (Order)	Unassigned SAR86 clade (Order)	Unassigned SAR86 clade (Order)	0.0352292	Pos	Prokaryote-Protist
ASV7793	Eukaryota	Spirotrichea	Strombidiida_B	Strombidiida_B_X	Strombidiida_B_XX	Strombidiida_B_XX_sp.	bASV11003	Bacteria	Alphaproteobacteria	Puniceispirillales	SAR116 clade	Candidatus Puniceispirillum	uncultured bacterium	-0.0194154	Neg	Prokaryote-Protist
ASV7805	Eukaryota	Spirotrichea	Strombidiida	Strombidiidae	Unassigned Strombidiidae (Family)	Unassigned Strombidiidae (Family)	bASV3593	Archaea	Thermoplasmata	Marine Group II	uncultured marine archaeon DCM3921	uncultured marine archaeon DCM3921	uncultured marine archaeon DCM3921	0.23894	Pos	Prokaryote-Protist
ASV7805	Eukaryota	Spirotrichea	Strombidiida	Strombidiidae	Unassigned Strombidiidae (Family)	Unassigned Strombidiidae (Family)	bASV545	Bacteria	Alphaproteobacteria	SAR11 clade	Clade II	Unassigned Clade II (Family)	Unassigned Clade II (Family)	0.00149388	Pos	Prokaryote-Protist
ASV7805	Eukaryota	Spirotrichea	Strombidiida	Strombidiidae	Unassigned Strombidiidae (Family)	Unassigned Strombidiidae (Family)	bASV5901	Bacteria	Bacteroidia	Flavobacteriales	Cryomorphaceae	uncultured	Unassigned uncultured (Genus)	0.0737122	Pos	Prokaryote-Protist
ASV7811	Eukaryota	Spirotrichea	Strombidiida	Strombidiidae	Unassigned Strombidiidae (Family)	Unassigned Strombidiidae (Family)	bASV11855	Bacteria	Alphaproteobacteria	Rhodobacterales	Rhodobacteraceae	Ascidiaceihabitans	Unassigned Ascidiaceihabitans (Genus)	0.186411	Pos	Prokaryote-Protist
ASV7811	Eukaryota	Spirotrichea	Strombidiida	Strombidiidae	Unassigned Strombidiidae (Family)	Unassigned Strombidiidae (Family)	bASV6260	Bacteria	Bacteroidia	Flavobacteriales	Flavobacteriaceae	NS5 marine group	Unassigned NS5 marine group (Genus)	0.128956	Pos	Prokaryote-Protist
ASV7814	Eukaryota	Spirotrichea	Strombidiida	Strombidiidae	Spirostrombidium	Spirostrombidium_agathae	bASV6277	Bacteria	Bacteroidia	Flavobacteriales	Flavobacteriaceae	NS5 marine group	uncultured Flavobacterium sp.	-0.023949	Neg	Prokaryote-Protist
ASV7877	Eukaryota	Spirotrichea	Tintinnida	TIN_11	TIN_11_X	TIN_11_X_sp.	bASV17044	Bacteria	Gammaproteobacteria	Betaproteobacteriales	Burkholderiaceae	RS62 marine group	uncultured bacterium	0.0513954	Pos	Prokaryote-Protist
ASV7877	Eukaryota	Spirotrichea	Tintinnida	TIN_11	TIN_11_X	TIN_11_X_sp.	bASV11706	Bacteria	Alphaproteobacteria	Rhodobacterales	Rhodobacteraceae	HIMB11	Unassigned HIMB11 (Genus)	-0.0825165	Neg	Prokaryote-Protist
ASV7877	Eukaryota	Spirotrichea	Tintinnida	TIN_11	TIN_11_X	TIN_11_X_sp.	bASV11872	Bacteria	Alphaproteobacteria	Rhodobacterales	Rhodobacteraceae	Unassigned Rhodobacteraceae (Family)	Unassigned Rhodobacteraceae (Family)	-0.107022	Neg	Prokaryote-Protist
ASV7877	Eukaryota	Spirotrichea	Tintinnida	TIN_11	TIN_11_X	TIN_11_X_sp.	bASV11924	Bacteria	Alphaproteobacteria	Rhodobacterales	Rhodobacteraceae	Unassigned Rhodobacteraceae (Family)	Unassigned Rhodobacteraceae (Family)	-0.0601724	Neg	Prokaryote-Protist
ASV7892	Eukaryota	Spirotrichea	Tintinnida	TIN_04	Tintinnopsis_04	Tintinnopsis_parvula	bASV5017	Bacteria	Bacteroidia	Sphingobacteriales	NS11-12 marine group	uncultured Bacteroidetes bacterium	uncultured Bacteroidetes bacterium	-0.00677746	Neg	Prokaryote-Protist
ASV7892	Eukaryota	Spirotrichea	Tintinnida	TIN_04	Tintinnopsis_04	Tintinnopsis_parvula	bASV6841	Bacteria	Bacteroidia	Flavobacteriales	Flavobacteriaceae	NS3a marine group	Unassigned NS3a marine group (Genus)	0.132133	Pos	Prokaryote-Protist
ASV7901	Eukaryota	Spirotrichea	Tintinnida	TIN_05	Tintinnopsis_05	Unassigned Tintinnopsis_05 (Genus)	bASV657	Bacteria	Alphaproteobacteria	SAR11 clade	Clade I	Clade Ia	Unassigned Clade Ia (Genus)	0.0862708	Pos	Prokaryote-Protist
ASV8048	Eukaryota	Spirotrichea	Tintinnida	Tintinnidiidae	Tintinnidium	Unassigned Tintinnidium (Genus)	bASV11025	Bacteria	Alphaproteobacteria	Puniceispirillales	SAR116 clade	Candidatus Puniceispirillum	uncultured bacterium	0.0988361	Pos	Prokaryote-Protist
ASV8048	Eukaryota	Spirotrichea	Tintinnida	Tintinnidiidae	Tintinnidium	Unassigned Tintinnidium (Genus)	bASV10989	Bacteria	Alphaproteobacteria	Puniceispirillales	SAR116 clade	Candidatus Puniceispirillum	uncultured bacterium	0.148925	Pos	Prokaryote-Protist
ASV8048	Eukaryota	Spirotrichea	Tintinnida	Tintinnidiidae	Tintinnidium	Unassigned Tintinnidium (Genus)	bASV16799	Bacteria	Gammaproteobacteria	SAR86 clade	Unassigned SAR86 clade (Order)	Unassigned SAR86 clade (Order)	Unassigned SAR86 clade (Order)	0.0402076	Pos	Prokaryote-Protist
ASV8061	Eukaryota	Spirotrichea	Choreotrichida	Strombidinopsidae	Parastrombidinopsis	Unassigned Parastrombidinopsis (Genus)	bASV6638	Bacteria	Bacteroidia	Flavobacteriales	Flavobacteriaceae	Formosa	Unassigned Formosa (Genus)	0.0775665	Pos	Prokaryote-Protist
ASV8061	Eukaryota	Spirotrichea	Choreotrichida	Strombidinopsidae	Parastrombidinopsis	Unassigned Parastrombidinopsis (Genus)	bASV648	Bacteria	Alphaproteobacteria	SAR11 clade	Clade I	Clade Ia	Unassigned Clade Ia (Genus)	0.0311968	Pos	Prokaryote-Protist
ASV8061	Eukaryota	Spirotrichea	Choreotrichida	Strombidinopsidae	Parastrombidinopsis	Unassigned Parastrombidinopsis (Genus)	bASV17971	Bacteria	Gammaproteobacteria	OM182 clade	OM182 bacterium D4	OM182 bacterium D4	OM182 bacterium D4	0.00582077	Pos	Prokaryote-Protist
ASV8061	Eukaryota	Spirotrichea	Choreotrichida	Strombidinopsidae	Parastrombidinopsis	Unassigned Parastrombidinopsis (Genus)	bASV17819	Bacteria	Gammaproteobacteria	Cellvibrionales	Halieaceae	Luminiphilus	uncultured gamma proteobacterium	0.0796416	Pos	Prokaryote-Protist
ASV8061	Eukaryota	Spirotrichea	Choreotrichida	Strombidinopsidae	Parastrombidinopsis	Unassigned Parastrombidinopsis (Genus)	bASV11627	Bacteria	Alphaproteobacteria	Rhodobacterales	Rhodobacteraceae	Lentibacter	uncultured bacterium	0.12691	Pos	Prokaryote-Protist
ASV8065	Eukaryota	Spirotrichea	Choreotrichida	Strombidinopsidae	Strombidinopsis	Strombidinopsis_sp.	bASV6277	Bacteria	Bacteroidia	Flavobacteriales	Flavobacteriaceae	NS5 marine group	uncultured Flavobacterium sp.	0.0902948	Pos	Prokaryote-Protist
ASV8065	Eukaryota	Spirotrichea	Choreotrichida	Strombidinopsidae	Strombidinopsis	Strombidinopsis_sp.	bASV679	Bacteria	Alphaproteobacteria	SAR11 clade	Clade I	Clade Ia	Unassigned Clade Ia (Genus)	0.0695438	Pos	Prokaryote-Protist
ASV8065	Eukaryota	Spirotrichea	Choreotrichida	Strombidinopsidae	Strombidinopsis	Strombidinopsis_sp.	bASV10282	Bacteria	Verrucomicrobiae	Opitutales	Puniceicoccaceae	MB11C04 marine group	uncultured marine bacterium	0.0473669	Pos	Prokaryote-Protist
ASV8065	Eukaryota	Spirotrichea	Choreotrichida	Strombidinopsidae	Strombidinopsis	Strombidinopsis_sp.	bASV11627	Bacteria	Alphaproteobacteria	Rhodobacterales	Rhodobacteraceae	Lentibacter	uncultured bacterium	-0.0168084	Neg	Prokaryote-Protist
ASV8065	Eukaryota	Spirotrichea	Choreotrichida	Strombidinopsidae	Strombidinopsis	Strombidinopsis_sp.	bASV17222	Bacteria	Gammaproteobacteria	Betaproteobacteriales	Methylophilaceae	OM43 clade	Unassigned OM43 clade (Genus)	-0.0156268	Neg	Prokaryote-Protist
ASV8116	Eukaryota	Spirotrichea	Choreotrichida	Strobilidiidae_I	Pelagostrobilidium	Pelagostrobilidium_neptuni	bASV17232	Bacteria	Gammaproteobacteria	Betaproteobacteriales	Methylophilaceae	OM43 clade	Unassigned OM43 clade (Genus)	-0.134175	Neg	Prokaryote-Protist
ASV8128	Eukaryota	Spirotrichea	Choreotrichida	Strobilidiidae_I	Pelagostrobilidium	Pelagostrobilidium_sp.	bASV6279	Bacteria	Bacteroidia	Flavobacteriales	Flavobacteriaceae	NS5 marine group	uncultured Flavobacterium sp.	0.0105853	Pos	Prokaryote-Protist
ASV8128	Eukaryota	Spirotrichea	Choreotrichida	Strobilidiidae_I	Pelagostrobilidium	Pelagostrobilidium_sp.	bASV545	Bacteria	Alphaproteobacteria	SAR11 clade	Clade II	Unassigned Clade II (Family)	Unassigned Clade II (Family)	0.249145	Pos	Prokaryote-Protist
ASV8144	Eukaryota	Spirotrichea	Choreotrichida	Strobilidiidae	Strobilidiidae_X	Strobilidiidae_X_sp.	bASV6260	Bacteria	Bacteroidia	Flavobacteriales	Flavobacteriaceae	NS5 marine group	Unassigned NS5 marine group (Genus)	0.0490242	Pos	Prokaryote-Protist
ASV8144	Eukaryota	Spirotrichea	Choreotrichida	Strobilidiidae	Strobilidiidae_X	Strobilidiidae_X_sp.	bASV16799	Bacteria	Gammaproteobacteria	SAR86 clade	Unassigned SAR86 clade (Order)	Unassigned SAR86 clade (Order)	Unassigned SAR86 clade (Order)	0.0686427	Pos	Prokaryote-Protist
ASV8144	Eukaryota	Spirotrichea	Choreotrichida	Strobilidiidae	Strobilidiidae_X	Strobilidiidae_X_sp.	bASV679	Bacteria	Alphaproteobacteria	SAR11 clade	Clade I	Clade Ia	Unassigned Clade Ia (Genus)	0.00636765	Pos	Prokaryote-Protist
ASV8144	Eukaryota	Spirotrichea	Choreotrichida	Strobilidiidae	Strobilidiidae_X	Strobilidiidae_X_sp.	bASV11002	Bacteria	Alphaproteobacteria	Puniceispirillales	SAR116 clade	Candidatus Puniceispirillum	uncultured bacterium	-0.0566947	Neg	Prokaryote-Protist
ASV8206	Eukaryota	Filosa-Imbricatea	Filosa-Imbricatea_X	Novel-clade-2	Novel-clade-2_X	Novel-clade-2_X_sp.	bASV17819	Bacteria	Gammaproteobacteria	Cellvibrionales	Halieaceae	Luminiphilus	uncultured gamma proteobacterium	0.00794116	Pos	Prokaryote-Protist
ASV8262	Eukaryota	Colpodellidea	Colpodellida	Chrompodellids_CHR1_XX	Chrompodellids_CHR1_XXX	Chrompodellids_CHR1_XXX_sp.	bASV9852	Bacteria	Acidimicrobiia	Actinomarinales	Actinomarinaceae	Candidatus Actinomarina	uncultured actinobacterium	0.117875	Pos	Prokaryote-Protist
ASV8262	Eukaryota	Colpodellidea	Colpodellida	Chrompodellids_CHR1_XX	Chrompodellids_CHR1_XXX	Chrompodellids_CHR1_XXX_sp.	bASV6279	Bacteria	Bacteroidia	Flavobacteriales	Flavobacteriaceae	NS5 marine group	uncultured Flavobacterium sp.	0.011635	Pos	Prokaryote-Protist
ASV8262	Eukaryota	Colpodellidea	Colpodellida	Chrompodellids_CHR1_XX	Chrompodellids_CHR1_XXX	Chrompodellids_CHR1_XXX_sp.	bASV539	Bacteria	Alphaproteobacteria	SAR11 clade	Clade II	Unassigned Clade II (Family)	Unassigned Clade II (Family)	0.101457	Pos	Prokaryote-Protist
ASV840	Eukaryota	Filosa-Thecofilosea	Cryomonadida	Protaspa-lineage	Protaspa-lineage_X	Protaspa-lineage_X_sp.	bASV10282	Bacteria	Verrucomicrobiae	Opitutales	Puniceicoccaceae	MB11C04 marine group	uncultured marine bacterium	0.0941027	Pos	Prokaryote-Protist
ASV842	Eukaryota	Filosa-Thecofilosea	Cryomonadida	Protaspa-lineage	Protaspa-lineage_X	Protaspa-lineage_X_sp.	bASV6477	Bacteria	Bacteroidia	Flavobacteriales	Flavobacteriaceae	NS5 marine group	Unassigned NS5 marine group (Genus)	0.00374248	Pos	Prokaryote-Protist
ASV842	Eukaryota	Filosa-Thecofilosea	Cryomonadida	Protaspa-lineage	Protaspa-lineage_X	Protaspa-lineage_X_sp.	bASV661	Bacteria	Alphaproteobacteria	SAR11 clade	Clade I	Clade Ia	Unassigned Clade Ia (Genus)	0.125986	Pos	Prokaryote-Protist
ASV8512	Eukaryota	Syndiniales	Dino-Group-II	Dino-Group-II-Clade-1	Dino-Group-II-Clade-1_X	Dino-Group-II-Clade-1_X_sp.	bASV17819	Bacteria	Gammaproteobacteria	Cellvibrionales	Halieaceae	Luminiphilus	uncultured gamma proteobacterium	0.0995521	Pos	Prokaryote-Protist
ASV864	Eukaryota	Filosa-Thecofilosea	Cryomonadida	Protaspa-lineage	Protaspa-lineage_X	Protaspa-lineage_X_sp.	bASV6546	Bacteria	Bacteroidia	Flavobacteriales	Flavobacteriaceae	NS4 marine group	Unassigned NS4 marine group (Genus)	0.0241795	Pos	Prokaryote-Protist
ASV864	Eukaryota	Filosa-Thecofilosea	Cryomonadida	Protaspa-lineage	Protaspa-lineage_X	Protaspa-lineage_X_sp.	bASV9852	Bacteria	Acidimicrobiia	Actinomarinales	Actinomarinaceae	Candidatus Actinomarina	uncultured actinobacterium	0.00266325	Pos	Prokaryote-Protist
ASV8799	Eukaryota	Syndiniales	Dino-Group-II	Unassigned Dino-Group-II (Order)	Unassigned Dino-Group-II (Order)	Unassigned Dino-Group-II (Order)	bASV704	Bacteria	Alphaproteobacteria	SAR11 clade	Clade III	Unassigned Clade III (Family)	Unassigned Clade III (Family)	0.0773078	Pos	Prokaryote-Protist
ASV8799	Eukaryota	Syndiniales	Dino-Group-II	Unassigned Dino-Group-II (Order)	Unassigned Dino-Group-II (Order)	Unassigned Dino-Group-II (Order)	bASV7135	Bacteria	Bacteroidia	Flavobacteriales	Flavobacteriaceae	uncultured	Flavobacteriaceae bacterium LE20	0.102955	Pos	Prokaryote-Protist
ASV8962	Eukaryota	Syndiniales	Dino-Group-II	Dino-Group-II-Clade-6	Dino-Group-II-Clade-6_X	Dino-Group-II-Clade-6_X_sp.	bASV9820	Bacteria	Acidimicrobiia	Actinomarinales	Actinomarinaceae	Candidatus Actinomarina	Unassigned Candidatus Actinomarina (Genus)	0.180974	Pos	Prokaryote-Protist
ASV8962	Eukaryota	Syndiniales	Dino-Group-II	Dino-Group-II-Clade-6	Dino-Group-II-Clade-6_X	Dino-Group-II-Clade-6_X_sp.	bASV17256	Bacteria	Gammaproteobacteria	Betaproteobacteriales	Methylophilaceae	OM43 clade	Unassigned OM43 clade (Genus)	0.345643	Pos	Prokaryote-Protist
ASV8962	Eukaryota	Syndiniales	Dino-Group-II	Dino-Group-II-Clade-6	Dino-Group-II-Clade-6_X	Dino-Group-II-Clade-6_X_sp.	bASV9685	Bacteria	Actinobacteria	Micrococcales	Microbacteriaceae	Candidatus Aquiluna	uncultured bacterium	0.00911181	Pos	Prokaryote-Protist
ASV8962	Eukaryota	Syndiniales	Dino-Group-II	Dino-Group-II-Clade-6	Dino-Group-II-Clade-6_X	Dino-Group-II-Clade-6_X_sp.	bASV18264	Bacteria	Gammaproteobacteria	Oceanospirillales	Pseudohongiellaceae	Pseudohongiella	Unassigned Pseudohongiella (Genus)	0.194293	Pos	Prokaryote-Protist
ASV8965	Eukaryota	Syndiniales	Dino-Group-II	Dino-Group-II-Clade-6	Dino-Group-II-Clade-6_X	Dino-Group-II-Clade-6_X_sp.	bASV5016	Bacteria	Bacteroidia	Sphingobacteriales	NS11-12 marine group	uncultured Bacteroidetes bacterium	uncultured Bacteroidetes bacterium	0.0747448	Pos	Prokaryote-Protist
ASV8965	Eukaryota	Syndiniales	Dino-Group-II	Dino-Group-II-Clade-6	Dino-Group-II-Clade-6_X	Dino-Group-II-Clade-6_X_sp.	bASV11003	Bacteria	Alphaproteobacteria	Puniceispirillales	SAR116 clade	Candidatus Puniceispirillum	uncultured bacterium	-0.0109901	Neg	Prokaryote-Protist
ASV8965	Eukaryota	Syndiniales	Dino-Group-II	Dino-Group-II-Clade-6	Dino-Group-II-Clade-6_X	Dino-Group-II-Clade-6_X_sp.	bASV17996	Bacteria	Gammaproteobacteria	Cellvibrionales	Spongiibacteraceae	Unassigned Spongiibacteraceae (Family)	Unassigned Spongiibacteraceae (Family)	0.0936395	Pos	Prokaryote-Protist
ASV8965	Eukaryota	Syndiniales	Dino-Group-II	Dino-Group-II-Clade-6	Dino-Group-II-Clade-6_X	Dino-Group-II-Clade-6_X_sp.	bASV16740	Bacteria	Gammaproteobacteria	SAR86 clade	Unassigned SAR86 clade (Order)	Unassigned SAR86 clade (Order)	Unassigned SAR86 clade (Order)	-0.0190339	Neg	Prokaryote-Protist
ASV8965	Eukaryota	Syndiniales	Dino-Group-II	Dino-Group-II-Clade-6	Dino-Group-II-Clade-6_X	Dino-Group-II-Clade-6_X_sp.	bASV11905	Bacteria	Alphaproteobacteria	Rhodobacterales	Rhodobacteraceae	Unassigned Rhodobacteraceae (Family)	Unassigned Rhodobacteraceae (Family)	0.0472684	Pos	Prokaryote-Protist
ASV9094	Eukaryota	Syndiniales	Dino-Group-I	Dino-Group-I-Clade-4	Dino-Group-I-Clade-4_X	Dino-Group-I-Clade-4_X_sp.	bASV6279	Bacteria	Bacteroidia	Flavobacteriales	Flavobacteriaceae	NS5 marine group	uncultured Flavobacterium sp.	0.0546688	Pos	Prokaryote-Protist
ASV9094	Eukaryota	Syndiniales	Dino-Group-I	Dino-Group-I-Clade-4	Dino-Group-I-Clade-4_X	Dino-Group-I-Clade-4_X_sp.	bASV10989	Bacteria	Alphaproteobacteria	Puniceispirillales	SAR116 clade	Candidatus Puniceispirillum	uncultured bacterium	0.0475717	Pos	Prokaryote-Protist
ASV9094	Eukaryota	Syndiniales	Dino-Group-I	Dino-Group-I-Clade-4	Dino-Group-I-Clade-4_X	Dino-Group-I-Clade-4_X_sp.	bASV16774	Bacteria	Gammaproteobacteria	SAR86 clade	Unassigned SAR86 clade (Order)	Unassigned SAR86 clade (Order)	Unassigned SAR86 clade (Order)	0.023485	Pos	Prokaryote-Protist
ASV9094	Eukaryota	Syndiniales	Dino-Group-I	Dino-Group-I-Clade-4	Dino-Group-I-Clade-4_X	Dino-Group-I-Clade-4_X_sp.	bASV17232	Bacteria	Gammaproteobacteria	Betaproteobacteriales	Methylophilaceae	OM43 clade	Unassigned OM43 clade (Genus)	0.0618607	Pos	Prokaryote-Protist
ASV9095	Eukaryota	Syndiniales	Dino-Group-I	Dino-Group-I-Clade-4	Dino-Group-I-Clade-4_X	Dino-Group-I-Clade-4_X_sp.	bASV539	Bacteria	Alphaproteobacteria	SAR11 clade	Clade II	Unassigned Clade II (Family)	Unassigned Clade II (Family)	0.023302	Pos	Prokaryote-Protist
ASV9095	Eukaryota	Syndiniales	Dino-Group-I	Dino-Group-I-Clade-4	Dino-Group-I-Clade-4_X	Dino-Group-I-Clade-4_X_sp.	bASV9852	Bacteria	Acidimicrobiia	Actinomarinales	Actinomarinaceae	Candidatus Actinomarina	uncultured actinobacterium	0.0238308	Pos	Prokaryote-Protist
ASV9095	Eukaryota	Syndiniales	Dino-Group-I	Dino-Group-I-Clade-4	Dino-Group-I-Clade-4_X	Dino-Group-I-Clade-4_X_sp.	bASV10989	Bacteria	Alphaproteobacteria	Puniceispirillales	SAR116 clade	Candidatus Puniceispirillum	uncultured bacterium	0.00282875	Pos	Prokaryote-Protist
ASV9160	Eukaryota	Dinophyceae	Gonyaulacales	Goniodomataceae	Alexandrium	Unassigned Alexandrium (Genus)	bASV9678	Bacteria	Actinobacteria	Micrococcales	Microbacteriaceae	Candidatus Aquiluna	Unassigned Candidatus Aquiluna (Genus)	-0.0123621	Neg	Prokaryote-Protist
ASV9160	Eukaryota	Dinophyceae	Gonyaulacales	Goniodomataceae	Alexandrium	Unassigned Alexandrium (Genus)	bASV16799	Bacteria	Gammaproteobacteria	SAR86 clade	Unassigned SAR86 clade (Order)	Unassigned SAR86 clade (Order)	Unassigned SAR86 clade (Order)	0.0961707	Pos	Prokaryote-Protist
ASV9160	Eukaryota	Dinophyceae	Gonyaulacales	Goniodomataceae	Alexandrium	Unassigned Alexandrium (Genus)	bASV9874	Bacteria	Acidimicrobiia	Actinomarinales	Actinomarinaceae	Candidatus Actinomarina	Unassigned Candidatus Actinomarina (Genus)	0.0565979	Pos	Prokaryote-Protist
ASV9427	Eukaryota	Dinophyceae	Gymnodiniales	Gymnodiniaceae	Gyrodinium	Gyrodinium_dominans	bASV11694	Bacteria	Alphaproteobacteria	Rhodobacterales	Rhodobacteraceae	Unassigned Rhodobacteraceae (Family)	Unassigned Rhodobacteraceae (Family)	-0.0710429	Neg	Prokaryote-Protist
ASV9427	Eukaryota	Dinophyceae	Gymnodiniales	Gymnodiniaceae	Gyrodinium	Gyrodinium_dominans	bASV6225	Bacteria	Bacteroidia	Flavobacteriales	Flavobacteriaceae	NS5 marine group	uncultured Bacteroidetes bacterium	0.0466564	Pos	Prokaryote-Protist
ASV9427	Eukaryota	Dinophyceae	Gymnodiniales	Gymnodiniaceae	Gyrodinium	Gyrodinium_dominans	bASV5017	Bacteria	Bacteroidia	Sphingobacteriales	NS11-12 marine group	uncultured Bacteroidetes bacterium	uncultured Bacteroidetes bacterium	0.0217723	Pos	Prokaryote-Protist
ASV9427	Eukaryota	Dinophyceae	Gymnodiniales	Gymnodiniaceae	Gyrodinium	Gyrodinium_dominans	bASV10282	Bacteria	Verrucomicrobiae	Opitutales	Puniceicoccaceae	MB11C04 marine group	uncultured marine bacterium	0.0170081	Pos	Prokaryote-Protist
ASV9427	Eukaryota	Dinophyceae	Gymnodiniales	Gymnodiniaceae	Gyrodinium	Gyrodinium_dominans	bASV7452	Bacteria	Bacteroidia	Flavobacteriales	Crocinitomicaceae	Crocinitomix	unidentified marine bacterioplankton	-0.0120895	Neg	Prokaryote-Protist
ASV9486	Eukaryota	Dinophyceae	Gymnodiniales	Gymnodiniaceae	Gymnodinium	Gymnodinium_sp.	bASV661	Bacteria	Alphaproteobacteria	SAR11 clade	Clade I	Clade Ia	Unassigned Clade Ia (Genus)	-0.15885	Neg	Prokaryote-Protist
ASV9486	Eukaryota	Dinophyceae	Gymnodiniales	Gymnodiniaceae	Gymnodinium	Gymnodinium_sp.	bASV16799	Bacteria	Gammaproteobacteria	SAR86 clade	Unassigned SAR86 clade (Order)	Unassigned SAR86 clade (Order)	Unassigned SAR86 clade (Order)	0.0601951	Pos	Prokaryote-Protist
ASV9507	Eukaryota	Dinophyceae	Unassigned Dinophyceae (Class)	Unassigned Dinophyceae (Class)	Unassigned Dinophyceae (Class)	Unassigned Dinophyceae (Class)	bASV6841	Bacteria	Bacteroidia	Flavobacteriales	Flavobacteriaceae	NS3a marine group	Unassigned NS3a marine group (Genus)	0.107918	Pos	Prokaryote-Protist
ASV9507	Eukaryota	Dinophyceae	Unassigned Dinophyceae (Class)	Unassigned Dinophyceae (Class)	Unassigned Dinophyceae (Class)	Unassigned Dinophyceae (Class)	bASV680	Bacteria	Alphaproteobacteria	SAR11 clade	Clade I	Clade Ia	Unassigned Clade Ia (Genus)	-0.0320085	Neg	Prokaryote-Protist
ASV9508	Eukaryota	Dinophyceae	Unassigned Dinophyceae (Class)	Unassigned Dinophyceae (Class)	Unassigned Dinophyceae (Class)	Unassigned Dinophyceae (Class)	bASV12442	Bacteria	Alphaproteobacteria	Puniceispirillales	uncultured	Unassigned uncultured (Family)	Unassigned uncultured (Family)	-0.0409025	Neg	Prokaryote-Protist
ASV9508	Eukaryota	Dinophyceae	Unassigned Dinophyceae (Class)	Unassigned Dinophyceae (Class)	Unassigned Dinophyceae (Class)	Unassigned Dinophyceae (Class)	bASV11443	Bacteria	Alphaproteobacteria	Rhodospirillales	AEGEAN-169 marine group	Unassigned AEGEAN-169 marine group (Family)	Unassigned AEGEAN-169 marine group (Family)	-0.191238	Neg	Prokaryote-Protist
ASV9508	Eukaryota	Dinophyceae	Unassigned Dinophyceae (Class)	Unassigned Dinophyceae (Class)	Unassigned Dinophyceae (Class)	Unassigned Dinophyceae (Class)	bASV11002	Bacteria	Alphaproteobacteria	Puniceispirillales	SAR116 clade	Candidatus Puniceispirillum	uncultured bacterium	-0.0280222	Neg	Prokaryote-Protist
ASV9531	Eukaryota	Dinophyceae	Gymnodiniales	Gymnodiniaceae	Unassigned Gymnodiniaceae (Family)	Unassigned Gymnodiniaceae (Family)	bASV15721	Bacteria	Gammaproteobacteria	Thiomicrospirales	Thioglobaceae	SUP05 cluster	uncultured bacterium	0.0393243	Pos	Prokaryote-Protist
ASV9531	Eukaryota	Dinophyceae	Gymnodiniales	Gymnodiniaceae	Unassigned Gymnodiniaceae (Family)	Unassigned Gymnodiniaceae (Family)	bASV704	Bacteria	Alphaproteobacteria	SAR11 clade	Clade III	Unassigned Clade III (Family)	Unassigned Clade III (Family)	-0.0347533	Neg	Prokaryote-Protist
ASV9531	Eukaryota	Dinophyceae	Gymnodiniales	Gymnodiniaceae	Unassigned Gymnodiniaceae (Family)	Unassigned Gymnodiniaceae (Family)	bASV16740	Bacteria	Gammaproteobacteria	SAR86 clade	Unassigned SAR86 clade (Order)	Unassigned SAR86 clade (Order)	Unassigned SAR86 clade (Order)	-0.240228	Neg	Prokaryote-Protist
ASV9584	Eukaryota	Dinophyceae	Gymnodiniales	Gymnodiniaceae	Polykrikos	Polykrikos_kofoidii	bASV7030	Bacteria	Bacteroidia	Flavobacteriales	Flavobacteriaceae	uncultured	marine metagenome	-0.00371998	Neg	Prokaryote-Protist
ASV9584	Eukaryota	Dinophyceae	Gymnodiniales	Gymnodiniaceae	Polykrikos	Polykrikos_kofoidii	bASV11924	Bacteria	Alphaproteobacteria	Rhodobacterales	Rhodobacteraceae	Unassigned Rhodobacteraceae (Family)	Unassigned Rhodobacteraceae (Family)	0.0153561	Pos	Prokaryote-Protist
ASV9608	Eukaryota	Dinophyceae	Gymnodiniales	Gymnodiniaceae	Gymnodinium	Gymnodinium_sp.	bASV11621	Bacteria	Alphaproteobacteria	Rhodobacterales	Rhodobacteraceae	Planktomarina	Unassigned Planktomarina (Genus)	0.121782	Pos	Prokaryote-Protist
ASV9608	Eukaryota	Dinophyceae	Gymnodiniales	Gymnodiniaceae	Gymnodinium	Gymnodinium_sp.	bASV11872	Bacteria	Alphaproteobacteria	Rhodobacterales	Rhodobacteraceae	Unassigned Rhodobacteraceae (Family)	Unassigned Rhodobacteraceae (Family)	-0.0191379	Neg	Prokaryote-Protist
ASV9623	Eukaryota	Dinophyceae	Gymnodiniales	Gymnodiniaceae	Gymnodinium	Gymnodinium_sp.	bASV11626	Bacteria	Alphaproteobacteria	Rhodobacterales	Rhodobacteraceae	Lentibacter	uncultured bacterium	-0.121656	Neg	Prokaryote-Protist
ASV9631	Eukaryota	Dinophyceae	Gymnodiniales	Unassigned Gymnodiniales (Order)	Unassigned Gymnodiniales (Order)	Unassigned Gymnodiniales (Order)	bASV11669	Bacteria	Alphaproteobacteria	Rhodobacterales	Rhodobacteraceae	Litorimicrobium	uncultured alpha proteobacterium	0.0180526	Pos	Prokaryote-Protist
ASV9631	Eukaryota	Dinophyceae	Gymnodiniales	Unassigned Gymnodiniales (Order)	Unassigned Gymnodiniales (Order)	Unassigned Gymnodiniales (Order)	bASV5903	Bacteria	Bacteroidia	Flavobacteriales	Cryomorphaceae	uncultured	Unassigned uncultured (Genus)	-0.0258067	Neg	Prokaryote-Protist
ASV9631	Eukaryota	Dinophyceae	Gymnodiniales	Unassigned Gymnodiniales (Order)	Unassigned Gymnodiniales (Order)	Unassigned Gymnodiniales (Order)	bASV5899	Bacteria	Bacteroidia	Flavobacteriales	Cryomorphaceae	uncultured	Unassigned uncultured (Genus)	0.0772647	Pos	Prokaryote-Protist
ASV9637	Eukaryota	Dinophyceae	Unassigned Dinophyceae (Class)	Unassigned Dinophyceae (Class)	Unassigned Dinophyceae (Class)	Unassigned Dinophyceae (Class)	bASV17044	Bacteria	Gammaproteobacteria	Betaproteobacteriales	Burkholderiaceae	RS62 marine group	uncultured bacterium	0.224675	Pos	Prokaryote-Protist
ASV9659	Eukaryota	Dinophyceae	Peridiniales	Heterocapsaceae	Heterocapsa	Unassigned Heterocapsa (Genus)	bASV9880	Bacteria	Acidimicrobiia	Actinomarinales	Actinomarinaceae	Candidatus Actinomarina	Unassigned Candidatus Actinomarina (Genus)	0.00384038	Pos	Prokaryote-Protist
ASV9660	Eukaryota	Dinophyceae	Peridiniales	Heterocapsaceae	Heterocapsa	Unassigned Heterocapsa (Genus)	bASV11621	Bacteria	Alphaproteobacteria	Rhodobacterales	Rhodobacteraceae	Planktomarina	Unassigned Planktomarina (Genus)	-0.16264	Neg	Prokaryote-Protist
ASV9660	Eukaryota	Dinophyceae	Peridiniales	Heterocapsaceae	Heterocapsa	Unassigned Heterocapsa (Genus)	bASV11708	Bacteria	Alphaproteobacteria	Rhodobacterales	Rhodobacteraceae	HIMB11	Unassigned HIMB11 (Genus)	0.0185275	Pos	Prokaryote-Protist
ASV9668	Eukaryota	Dinophyceae	Peridiniales	Heterocapsaceae	Heterocapsa	Heterocapsa_rotundata	bASV9852	Bacteria	Acidimicrobiia	Actinomarinales	Actinomarinaceae	Candidatus Actinomarina	uncultured actinobacterium	-0.00878387	Neg	Prokaryote-Protist
ASV9668	Eukaryota	Dinophyceae	Peridiniales	Heterocapsaceae	Heterocapsa	Heterocapsa_rotundata	bASV11706	Bacteria	Alphaproteobacteria	Rhodobacterales	Rhodobacteraceae	HIMB11	Unassigned HIMB11 (Genus)	-0.0102956	Neg	Prokaryote-Protist
ASV9669	Eukaryota	Dinophyceae	Peridiniales	Heterocapsaceae	Heterocapsa	Heterocapsa_rotundata	bASV17044	Bacteria	Gammaproteobacteria	Betaproteobacteriales	Burkholderiaceae	RS62 marine group	uncultured bacterium	0.0740792	Pos	Prokaryote-Protist
ASV9669	Eukaryota	Dinophyceae	Peridiniales	Heterocapsaceae	Heterocapsa	Heterocapsa_rotundata	bASV5017	Bacteria	Bacteroidia	Sphingobacteriales	NS11-12 marine group	uncultured Bacteroidetes bacterium	uncultured Bacteroidetes bacterium	-0.0262625	Neg	Prokaryote-Protist
ASV9669	Eukaryota	Dinophyceae	Peridiniales	Heterocapsaceae	Heterocapsa	Heterocapsa_rotundata	bASV11626	Bacteria	Alphaproteobacteria	Rhodobacterales	Rhodobacteraceae	Lentibacter	uncultured bacterium	0.0432467	Pos	Prokaryote-Protist
ASV9669	Eukaryota	Dinophyceae	Peridiniales	Heterocapsaceae	Heterocapsa	Heterocapsa_rotundata	bASV15493	Bacteria	Gammaproteobacteria	Cellvibrionales	Porticoccaceae	SAR92 clade	Unassigned SAR92 clade (Genus)	0.192451	Pos	Prokaryote-Protist
ASV9880	Eukaryota	Dinophyceae	Suessiales	Suessiaceae	Unassigned Suessiaceae (Family)	Unassigned Suessiaceae (Family)	bASV17819	Bacteria	Gammaproteobacteria	Cellvibrionales	Halieaceae	Luminiphilus	uncultured gamma proteobacterium	0.133058	Pos	Prokaryote-Protist
ASV9884	Eukaryota	Dinophyceae	Suessiales	Suessiaceae	Biecheleria	Biecheleria_cincta	bASV661	Bacteria	Alphaproteobacteria	SAR11 clade	Clade I	Clade Ia	Unassigned Clade Ia (Genus)	-0.0369558	Neg	Prokaryote-Protist
ASV9884	Eukaryota	Dinophyceae	Suessiales	Suessiaceae	Biecheleria	Biecheleria_cincta	bASV9874	Bacteria	Acidimicrobiia	Actinomarinales	Actinomarinaceae	Candidatus Actinomarina	Unassigned Candidatus Actinomarina (Genus)	-0.0149117	Neg	Prokaryote-Protist
ASV9925	Eukaryota	Dinophyceae	Peridiniales	Thoracosphaeraceae	Unassigned Thoracosphaeraceae (Family)	Unassigned Thoracosphaeraceae (Family)	bASV11002	Bacteria	Alphaproteobacteria	Puniceispirillales	SAR116 clade	Candidatus Puniceispirillum	uncultured bacterium	-0.0850954	Neg	Prokaryote-Protist
ASV9992	Eukaryota	Dinophyceae	Peridiniales	Amphidiniopsidaceae	Islandinium	Islandinium_tricingulatum	bASV16734	Bacteria	Gammaproteobacteria	SAR86 clade	Unassigned SAR86 clade (Order)	Unassigned SAR86 clade (Order)	Unassigned SAR86 clade (Order)	0.0718361	Pos	Prokaryote-Protist
ASV10002	Eukaryota	Dinophyceae	Peridiniales	Unassigned Peridiniales (Order)	Unassigned Peridiniales (Order)	Unassigned Peridiniales (Order)	ASV2826	Eukaryota	Bacillariophyta	Bacillariophyta_X	Polar-centric-Mediophyceae	Unassigned Polar-centric-Mediophyceae (Family)	Unassigned Polar-centric-Mediophyceae (Family)	-0.105284	Neg	Protist-Protist
ASV10002	Eukaryota	Dinophyceae	Peridiniales	Unassigned Peridiniales (Order)	Unassigned Peridiniales (Order)	Unassigned Peridiniales (Order)	ASV7877	Eukaryota	Spirotrichea	Tintinnida	TIN_11	TIN_11_X	TIN_11_X_sp.	0.0568074	Pos	Protist-Protist
ASV10002	Eukaryota	Dinophyceae	Peridiniales	Unassigned Peridiniales (Order)	Unassigned Peridiniales (Order)	Unassigned Peridiniales (Order)	ASV515	Eukaryota	Filosa-Imbricatea	Filosa-Imbricatea_X	Filosa-Imbricatea_XX	Filosa-Imbricatea_XXX	Filosa-Imbricatea_XXX_sp.	0.498424	Pos	Protist-Protist
ASV10002	Eukaryota	Dinophyceae	Peridiniales	Unassigned Peridiniales (Order)	Unassigned Peridiniales (Order)	Unassigned Peridiniales (Order)	ASV2520	Eukaryota	Bacillariophyta	Bacillariophyta_X	Polar-centric-Mediophyceae	Chaetoceros	Chaetoceros_pumilum	0.338925	Pos	Protist-Protist
ASV10002	Eukaryota	Dinophyceae	Peridiniales	Unassigned Peridiniales (Order)	Unassigned Peridiniales (Order)	Unassigned Peridiniales (Order)	ASV9637	Eukaryota	Dinophyceae	Unassigned Dinophyceae (Class)	Unassigned Dinophyceae (Class)	Unassigned Dinophyceae (Class)	Unassigned Dinophyceae (Class)	0.0526452	Pos	Protist-Protist
ASV10002	Eukaryota	Dinophyceae	Peridiniales	Unassigned Peridiniales (Order)	Unassigned Peridiniales (Order)	Unassigned Peridiniales (Order)	ASV3546	Eukaryota	MAST-6	MAST-6_X	MAST-6_XX	MAST-6_XXX	MAST-6_XXX_sp.	-0.0146505	Neg	Protist-Protist
ASV10002	Eukaryota	Dinophyceae	Peridiniales	Unassigned Peridiniales (Order)	Unassigned Peridiniales (Order)	Unassigned Peridiniales (Order)	ASV2579	Eukaryota	Bacillariophyta	Bacillariophyta_X	Polar-centric-Mediophyceae	Chaetoceros	Unassigned Chaetoceros (Genus)	0.11036	Pos	Protist-Protist
ASV10002	Eukaryota	Dinophyceae	Peridiniales	Unassigned Peridiniales (Order)	Unassigned Peridiniales (Order)	Unassigned Peridiniales (Order)	ASV7901	Eukaryota	Spirotrichea	Tintinnida	TIN_05	Tintinnopsis_05	Unassigned Tintinnopsis_05 (Genus)	0.315049	Pos	Protist-Protist
ASV10002	Eukaryota	Dinophyceae	Peridiniales	Unassigned Peridiniales (Order)	Unassigned Peridiniales (Order)	Unassigned Peridiniales (Order)	ASV9623	Eukaryota	Dinophyceae	Gymnodiniales	Gymnodiniaceae	Gymnodinium	Gymnodinium_sp.	-0.0608443	Neg	Protist-Protist
ASV10002	Eukaryota	Dinophyceae	Peridiniales	Unassigned Peridiniales (Order)	Unassigned Peridiniales (Order)	Unassigned Peridiniales (Order)	ASV1024	Eukaryota	Filosa-Thecofilosea	Ebriida	TAGIRI1-lineage	TAGIRI1-lineage_X	TAGIRI1-lineage_X_sp.	0.543216	Pos	Protist-Protist
ASV10030	Eukaryota	Dinophyceae	Unassigned Dinophyceae (Class)	Unassigned Dinophyceae (Class)	Unassigned Dinophyceae (Class)	Unassigned Dinophyceae (Class)	ASV9536	Eukaryota	Dinophyceae	Gymnodiniales	Gymnodiniaceae	Gymnodinium	Gymnodinium_sp.	-0.0218818	Neg	Protist-Protist
ASV10030	Eukaryota	Dinophyceae	Unassigned Dinophyceae (Class)	Unassigned Dinophyceae (Class)	Unassigned Dinophyceae (Class)	Unassigned Dinophyceae (Class)	ASV63	Eukaryota	Bacillariophyta	Bacillariophyta_X	Radial-centric-basal-Coscinodiscophyceae	Corethron	Corethron_hystrix	0.163884	Pos	Protist-Protist
ASV10030	Eukaryota	Dinophyceae	Unassigned Dinophyceae (Class)	Unassigned Dinophyceae (Class)	Unassigned Dinophyceae (Class)	Unassigned Dinophyceae (Class)	ASV9565	Eukaryota	Dinophyceae	Unassigned Dinophyceae (Class)	Unassigned Dinophyceae (Class)	Unassigned Dinophyceae (Class)	Unassigned Dinophyceae (Class)	-0.255652	Neg	Protist-Protist
ASV10030	Eukaryota	Dinophyceae	Unassigned Dinophyceae (Class)	Unassigned Dinophyceae (Class)	Unassigned Dinophyceae (Class)	Unassigned Dinophyceae (Class)	ASV8048	Eukaryota	Spirotrichea	Tintinnida	Tintinnidiidae	Tintinnidium	Unassigned Tintinnidium (Genus)	-0.0969667	Neg	Protist-Protist
ASV10030	Eukaryota	Dinophyceae	Unassigned Dinophyceae (Class)	Unassigned Dinophyceae (Class)	Unassigned Dinophyceae (Class)	Unassigned Dinophyceae (Class)	ASV9486	Eukaryota	Dinophyceae	Gymnodiniales	Gymnodiniaceae	Gymnodinium	Gymnodinium_sp.	-0.0930987	Neg	Protist-Protist
ASV10030	Eukaryota	Dinophyceae	Unassigned Dinophyceae (Class)	Unassigned Dinophyceae (Class)	Unassigned Dinophyceae (Class)	Unassigned Dinophyceae (Class)	ASV7770	Eukaryota	Spirotrichea	Strombidiida	Strombidiidae_M	Strombidium_M	Strombidium_M_sp.	0.396831	Pos	Protist-Protist
ASV10047	Eukaryota	Dinophyceae	Peridiniales	Unassigned Peridiniales (Order)	Unassigned Peridiniales (Order)	Unassigned Peridiniales (Order)	ASV2864	Eukaryota	Bacillariophyta	Bacillariophyta_X	Polar-centric-Mediophyceae	Thalassiosira	Unassigned Thalassiosira (Genus)	0.00097255	Pos	Protist-Protist
ASV10047	Eukaryota	Dinophyceae	Peridiniales	Unassigned Peridiniales (Order)	Unassigned Peridiniales (Order)	Unassigned Peridiniales (Order)	ASV2823	Eukaryota	Bacillariophyta	Bacillariophyta_X	Polar-centric-Mediophyceae	Thalassiosira	Unassigned Thalassiosira (Genus)	0.0607197	Pos	Protist-Protist
ASV10047	Eukaryota	Dinophyceae	Peridiniales	Unassigned Peridiniales (Order)	Unassigned Peridiniales (Order)	Unassigned Peridiniales (Order)	ASV2637	Eukaryota	Bacillariophyta	Bacillariophyta_X	Polar-centric-Mediophyceae	Unassigned Polar-centric-Mediophyceae (Family)	Unassigned Polar-centric-Mediophyceae (Family)	0.0203692	Pos	Protist-Protist
ASV10047	Eukaryota	Dinophyceae	Peridiniales	Unassigned Peridiniales (Order)	Unassigned Peridiniales (Order)	Unassigned Peridiniales (Order)	ASV7892	Eukaryota	Spirotrichea	Tintinnida	TIN_04	Tintinnopsis_04	Tintinnopsis_parvula	-0.138109	Neg	Protist-Protist
ASV10047	Eukaryota	Dinophyceae	Peridiniales	Unassigned Peridiniales (Order)	Unassigned Peridiniales (Order)	Unassigned Peridiniales (Order)	ASV8364	Eukaryota	Syndiniales	Dino-Group-I	Dino-Group-I-Clade-1	Dino-Group-I-Clade-1_X	Dino-Group-I-Clade-1_X_sp.	0.300155	Pos	Protist-Protist
ASV10105	Eukaryota	Dinophyceae	Gymnodiniales	Gymnodiniaceae	Gyrodinium	Unassigned Gyrodinium (Genus)	ASV2105	Eukaryota	Bacillariophyta	Bacillariophyta_X	Raphid-pennate	Seminavis	Seminavis_sp.	0.0871327	Pos	Protist-Protist
ASV10105	Eukaryota	Dinophyceae	Gymnodiniales	Gymnodiniaceae	Gyrodinium	Unassigned Gyrodinium (Genus)	ASV6246	Eukaryota	Telonemia_X	Telonemia_XX	Telonemia-Group-1	Telonemia-Group-1_X	Telonemia-Group-1_X_sp.	0.144943	Pos	Protist-Protist
ASV10105	Eukaryota	Dinophyceae	Gymnodiniales	Gymnodiniaceae	Gyrodinium	Unassigned Gyrodinium (Genus)	ASV6993	Eukaryota	Mamiellophyceae	Mamiellales	Mamiellaceae	Micromonas	Micromonas_bravo_B1	0.393561	Pos	Protist-Protist
ASV10105	Eukaryota	Dinophyceae	Gymnodiniales	Gymnodiniaceae	Gyrodinium	Unassigned Gyrodinium (Genus)	ASV6438	Eukaryota	Cryptophyceae	Cryptomonadales	Cryptomonadales_X	Unassigned Cryptomonadales_X (Family)	Unassigned Cryptomonadales_X (Family)	0.05241	Pos	Protist-Protist
ASV10105	Eukaryota	Dinophyceae	Gymnodiniales	Gymnodiniaceae	Gyrodinium	Unassigned Gyrodinium (Genus)	ASV7089	Eukaryota	Pedinophyceae	Marsupiomonadales	Marsupiomonadaceae	Marsupiomonas	Unassigned Marsupiomonas (Genus)	0.215286	Pos	Protist-Protist
ASV10105	Eukaryota	Dinophyceae	Gymnodiniales	Gymnodiniaceae	Gyrodinium	Unassigned Gyrodinium (Genus)	ASV7181	Eukaryota	Unassigned Fungi (Division)	Unassigned Fungi (Division)	Unassigned Fungi (Division)	Unassigned Fungi (Division)	Unassigned Fungi (Division)	0.0683103	Pos	Protist-Protist
ASV10116	Eukaryota	Dinophyceae	Peridiniales	Unassigned Peridiniales (Order)	Unassigned Peridiniales (Order)	Unassigned Peridiniales (Order)	ASV10105	Eukaryota	Dinophyceae	Gymnodiniales	Gymnodiniaceae	Gyrodinium	Unassigned Gyrodinium (Genus)	0.00718334	Pos	Protist-Protist
ASV10116	Eukaryota	Dinophyceae	Peridiniales	Unassigned Peridiniales (Order)	Unassigned Peridiniales (Order)	Unassigned Peridiniales (Order)	ASV9623	Eukaryota	Dinophyceae	Gymnodiniales	Gymnodiniaceae	Gymnodinium	Gymnodinium_sp.	0.0387026	Pos	Protist-Protist
ASV10116	Eukaryota	Dinophyceae	Peridiniales	Unassigned Peridiniales (Order)	Unassigned Peridiniales (Order)	Unassigned Peridiniales (Order)	ASV7912	Eukaryota	Spirotrichea	Tintinnida	TIN_07	Tintinnopsis_07	Unassigned Tintinnopsis_07 (Genus)	-0.0384771	Neg	Protist-Protist
ASV10116	Eukaryota	Dinophyceae	Peridiniales	Unassigned Peridiniales (Order)	Unassigned Peridiniales (Order)	Unassigned Peridiniales (Order)	ASV63	Eukaryota	Bacillariophyta	Bacillariophyta_X	Radial-centric-basal-Coscinodiscophyceae	Corethron	Corethron_hystrix	0.202258	Pos	Protist-Protist
ASV10116	Eukaryota	Dinophyceae	Peridiniales	Unassigned Peridiniales (Order)	Unassigned Peridiniales (Order)	Unassigned Peridiniales (Order)	ASV7770	Eukaryota	Spirotrichea	Strombidiida	Strombidiidae_M	Strombidium_M	Strombidium_M_sp.	0.0438085	Pos	Protist-Protist
ASV10116	Eukaryota	Dinophyceae	Peridiniales	Unassigned Peridiniales (Order)	Unassigned Peridiniales (Order)	Unassigned Peridiniales (Order)	ASV2920	Eukaryota	Bacillariophyta	Bacillariophyta_X	Polar-centric-Mediophyceae	Skeletonema	Skeletonema_sp.	-0.120545	Neg	Protist-Protist
ASV10116	Eukaryota	Dinophyceae	Peridiniales	Unassigned Peridiniales (Order)	Unassigned Peridiniales (Order)	Unassigned Peridiniales (Order)	ASV3507	Eukaryota	MAST-1	MAST-1C	MAST-1C_X	MAST-1C_XX	MAST-1C_XX_sp.	-0.0863096	Neg	Protist-Protist
ASV10116	Eukaryota	Dinophyceae	Peridiniales	Unassigned Peridiniales (Order)	Unassigned Peridiniales (Order)	Unassigned Peridiniales (Order)	ASV515	Eukaryota	Filosa-Imbricatea	Filosa-Imbricatea_X	Filosa-Imbricatea_XX	Filosa-Imbricatea_XXX	Filosa-Imbricatea_XXX_sp.	-0.0997119	Neg	Protist-Protist
ASV10116	Eukaryota	Dinophyceae	Peridiniales	Unassigned Peridiniales (Order)	Unassigned Peridiniales (Order)	Unassigned Peridiniales (Order)	ASV8206	Eukaryota	Filosa-Imbricatea	Filosa-Imbricatea_X	Novel-clade-2	Novel-clade-2_X	Novel-clade-2_X_sp.	0.0782945	Pos	Protist-Protist
ASV10116	Eukaryota	Dinophyceae	Peridiniales	Unassigned Peridiniales (Order)	Unassigned Peridiniales (Order)	Unassigned Peridiniales (Order)	ASV9668	Eukaryota	Dinophyceae	Peridiniales	Heterocapsaceae	Heterocapsa	Heterocapsa_rotundata	-0.139617	Neg	Protist-Protist
ASV2519	Eukaryota	Bacillariophyta	Bacillariophyta_X	Polar-centric-Mediophyceae	Chaetoceros	Unassigned Chaetoceros (Genus)	ASV864	Eukaryota	Filosa-Thecofilosea	Cryomonadida	Protaspa-lineage	Protaspa-lineage_X	Protaspa-lineage_X_sp.	0.592579	Pos	Protist-Protist
ASV2520	Eukaryota	Bacillariophyta	Bacillariophyta_X	Polar-centric-Mediophyceae	Chaetoceros	Chaetoceros_pumilum	ASV515	Eukaryota	Filosa-Imbricatea	Filosa-Imbricatea_X	Filosa-Imbricatea_XX	Filosa-Imbricatea_XXX	Filosa-Imbricatea_XXX_sp.	0.0804248	Pos	Protist-Protist
ASV2545	Eukaryota	Bacillariophyta	Bacillariophyta_X	Polar-centric-Mediophyceae	Chaetoceros	Unassigned Chaetoceros (Genus)	ASV1564	Eukaryota	Filosa-Imbricatea	Filosa-Imbricatea_X	Novel-clade-2	Novel-clade-2_X	Novel-clade-2_X_sp.	0.41766	Pos	Protist-Protist
ASV2562	Eukaryota	Bacillariophyta	Bacillariophyta_X	Polar-centric-Mediophyceae	Chaetoceros	Chaetoceros_elegans	ASV63	Eukaryota	Bacillariophyta	Bacillariophyta_X	Radial-centric-basal-Coscinodiscophyceae	Corethron	Corethron_hystrix	0.156232	Pos	Protist-Protist
ASV2579	Eukaryota	Bacillariophyta	Bacillariophyta_X	Polar-centric-Mediophyceae	Chaetoceros	Unassigned Chaetoceros (Genus)	ASV2497	Eukaryota	Bacillariophyta	Bacillariophyta_X	Polar-centric-Mediophyceae	Chaetoceros	Chaetoceros_socialis_debilis	0.20403	Pos	Protist-Protist
ASV2582	Eukaryota	Bacillariophyta	Bacillariophyta_X	Polar-centric-Mediophyceae	Chaetoceros	Chaetoceros_decipiens	ASV1066	Eukaryota	Filosa-Thecofilosea	Ebriida	Ebriidae	Ebria	Ebria_tripartita	0.24946	Pos	Protist-Protist
ASV2582	Eukaryota	Bacillariophyta	Bacillariophyta_X	Polar-centric-Mediophyceae	Chaetoceros	Chaetoceros_decipiens	ASV1075	Eukaryota	Filosa-Thecofilosea	Ebriida	Ebriidae	Ebria	Ebria_tripartita	0.0512793	Pos	Protist-Protist
ASV2582	Eukaryota	Bacillariophyta	Bacillariophyta_X	Polar-centric-Mediophyceae	Chaetoceros	Chaetoceros_decipiens	ASV515	Eukaryota	Filosa-Imbricatea	Filosa-Imbricatea_X	Filosa-Imbricatea_XX	Filosa-Imbricatea_XXX	Filosa-Imbricatea_XXX_sp.	0.0279059	Pos	Protist-Protist
ASV2637	Eukaryota	Bacillariophyta	Bacillariophyta_X	Polar-centric-Mediophyceae	Unassigned Polar-centric-Mediophyceae (Family)	Unassigned Polar-centric-Mediophyceae (Family)	ASV2105	Eukaryota	Bacillariophyta	Bacillariophyta_X	Raphid-pennate	Seminavis	Seminavis_sp.	0.0156084	Pos	Protist-Protist
ASV2700	Eukaryota	Bacillariophyta	Bacillariophyta_X	Radial-centric-basal-Coscinodiscophyceae	Actinocyclus	Actinocyclus_curvatulus	ASV2582	Eukaryota	Bacillariophyta	Bacillariophyta_X	Polar-centric-Mediophyceae	Chaetoceros	Chaetoceros_decipiens	-0.108994	Neg	Protist-Protist
ASV2700	Eukaryota	Bacillariophyta	Bacillariophyta_X	Radial-centric-basal-Coscinodiscophyceae	Actinocyclus	Actinocyclus_curvatulus	ASV1066	Eukaryota	Filosa-Thecofilosea	Ebriida	Ebriidae	Ebria	Ebria_tripartita	-0.0917911	Neg	Protist-Protist
ASV2718	Eukaryota	Bacillariophyta	Bacillariophyta_X	Radial-centric-basal-Coscinodiscophyceae	Coscinodiscus	Coscinodiscus_sp.	ASV2545	Eukaryota	Bacillariophyta	Bacillariophyta_X	Polar-centric-Mediophyceae	Chaetoceros	Unassigned Chaetoceros (Genus)	0.17767	Pos	Protist-Protist
ASV2741	Eukaryota	Bacillariophyta	Bacillariophyta_X	Radial-centric-basal-Coscinodiscophyceae	Rhizosolenia	Rhizosolenia_delicatula	ASV515	Eukaryota	Filosa-Imbricatea	Filosa-Imbricatea_X	Filosa-Imbricatea_XX	Filosa-Imbricatea_XXX	Filosa-Imbricatea_XXX_sp.	0.238885	Pos	Protist-Protist
ASV2741	Eukaryota	Bacillariophyta	Bacillariophyta_X	Radial-centric-basal-Coscinodiscophyceae	Rhizosolenia	Rhizosolenia_delicatula	ASV2105	Eukaryota	Bacillariophyta	Bacillariophyta_X	Raphid-pennate	Seminavis	Seminavis_sp.	-0.0372941	Neg	Protist-Protist
ASV2741	Eukaryota	Bacillariophyta	Bacillariophyta_X	Radial-centric-basal-Coscinodiscophyceae	Rhizosolenia	Rhizosolenia_delicatula	ASV2520	Eukaryota	Bacillariophyta	Bacillariophyta_X	Polar-centric-Mediophyceae	Chaetoceros	Chaetoceros_pumilum	0.0706012	Pos	Protist-Protist
ASV2762	Eukaryota	Bacillariophyta	Bacillariophyta_X	Polar-centric-Mediophyceae	Thalassiosira	Thalassiosira_guillardii	ASV2497	Eukaryota	Bacillariophyta	Bacillariophyta_X	Polar-centric-Mediophyceae	Chaetoceros	Chaetoceros_socialis_debilis	0.108269	Pos	Protist-Protist
ASV2762	Eukaryota	Bacillariophyta	Bacillariophyta_X	Polar-centric-Mediophyceae	Thalassiosira	Thalassiosira_guillardii	ASV1066	Eukaryota	Filosa-Thecofilosea	Ebriida	Ebriidae	Ebria	Ebria_tripartita	0.256644	Pos	Protist-Protist
ASV2778	Eukaryota	Bacillariophyta	Bacillariophyta_X	Polar-centric-Mediophyceae	Cyclotella	Cyclotella_sp.	ASV2772	Eukaryota	Bacillariophyta	Bacillariophyta_X	Polar-centric-Mediophyceae	Cyclotella	Unassigned Cyclotella (Genus)	0.1236	Pos	Protist-Protist
ASV2823	Eukaryota	Bacillariophyta	Bacillariophyta_X	Polar-centric-Mediophyceae	Thalassiosira	Unassigned Thalassiosira (Genus)	ASV2772	Eukaryota	Bacillariophyta	Bacillariophyta_X	Polar-centric-Mediophyceae	Cyclotella	Unassigned Cyclotella (Genus)	0.331937	Pos	Protist-Protist
ASV2826	Eukaryota	Bacillariophyta	Bacillariophyta_X	Polar-centric-Mediophyceae	Unassigned Polar-centric-Mediophyceae (Family)	Unassigned Polar-centric-Mediophyceae (Family)	ASV2637	Eukaryota	Bacillariophyta	Bacillariophyta_X	Polar-centric-Mediophyceae	Unassigned Polar-centric-Mediophyceae (Family)	Unassigned Polar-centric-Mediophyceae (Family)	0.0623158	Pos	Protist-Protist
ASV2844	Eukaryota	Bacillariophyta	Bacillariophyta_X	Polar-centric-Mediophyceae	Thalassiosira	Unassigned Thalassiosira (Genus)	ASV2468	Eukaryota	Bacillariophyta	Bacillariophyta_X	Polar-centric-Mediophyceae	Chaetoceros	Chaetoceros_danicus	0.107143	Pos	Protist-Protist
ASV2844	Eukaryota	Bacillariophyta	Bacillariophyta_X	Polar-centric-Mediophyceae	Thalassiosira	Unassigned Thalassiosira (Genus)	ASV2545	Eukaryota	Bacillariophyta	Bacillariophyta_X	Polar-centric-Mediophyceae	Chaetoceros	Unassigned Chaetoceros (Genus)	-0.0480025	Neg	Protist-Protist
ASV2857	Eukaryota	Bacillariophyta	Bacillariophyta_X	Polar-centric-Mediophyceae	Thalassiosira	Thalassiosira_anguste-lineata	ASV2762	Eukaryota	Bacillariophyta	Bacillariophyta_X	Polar-centric-Mediophyceae	Thalassiosira	Thalassiosira_guillardii	0.292782	Pos	Protist-Protist
ASV2857	Eukaryota	Bacillariophyta	Bacillariophyta_X	Polar-centric-Mediophyceae	Thalassiosira	Thalassiosira_anguste-lineata	ASV2497	Eukaryota	Bacillariophyta	Bacillariophyta_X	Polar-centric-Mediophyceae	Chaetoceros	Chaetoceros_socialis_debilis	0.309947	Pos	Protist-Protist
ASV2858	Eukaryota	Bacillariophyta	Bacillariophyta_X	Polar-centric-Mediophyceae	Unassigned Polar-centric-Mediophyceae (Family)	Unassigned Polar-centric-Mediophyceae (Family)	ASV1564	Eukaryota	Filosa-Imbricatea	Filosa-Imbricatea_X	Novel-clade-2	Novel-clade-2_X	Novel-clade-2_X_sp.	0.246824	Pos	Protist-Protist
ASV2858	Eukaryota	Bacillariophyta	Bacillariophyta_X	Polar-centric-Mediophyceae	Unassigned Polar-centric-Mediophyceae (Family)	Unassigned Polar-centric-Mediophyceae (Family)	ASV2778	Eukaryota	Bacillariophyta	Bacillariophyta_X	Polar-centric-Mediophyceae	Cyclotella	Cyclotella_sp.	0.166205	Pos	Protist-Protist
ASV2858	Eukaryota	Bacillariophyta	Bacillariophyta_X	Polar-centric-Mediophyceae	Unassigned Polar-centric-Mediophyceae (Family)	Unassigned Polar-centric-Mediophyceae (Family)	ASV2734	Eukaryota	Bacillariophyta	Bacillariophyta_X	Radial-centric-basal-Coscinodiscophyceae	Guinardia	Guinardia_delicatula	0.66469	Pos	Protist-Protist
ASV2860	Eukaryota	Bacillariophyta	Bacillariophyta_X	Polar-centric-Mediophyceae	Thalassiosira	Thalassiosira_mala	ASV2849	Eukaryota	Bacillariophyta	Bacillariophyta_X	Polar-centric-Mediophyceae	Thalassiosira	Unassigned Thalassiosira (Genus)	0.00781484	Pos	Protist-Protist
ASV2860	Eukaryota	Bacillariophyta	Bacillariophyta_X	Polar-centric-Mediophyceae	Thalassiosira	Thalassiosira_mala	ASV2637	Eukaryota	Bacillariophyta	Bacillariophyta_X	Polar-centric-Mediophyceae	Unassigned Polar-centric-Mediophyceae (Family)	Unassigned Polar-centric-Mediophyceae (Family)	-0.0201428	Neg	Protist-Protist
ASV2860	Eukaryota	Bacillariophyta	Bacillariophyta_X	Polar-centric-Mediophyceae	Thalassiosira	Thalassiosira_mala	ASV840	Eukaryota	Filosa-Thecofilosea	Cryomonadida	Protaspa-lineage	Protaspa-lineage_X	Protaspa-lineage_X_sp.	0.0976343	Pos	Protist-Protist
ASV2864	Eukaryota	Bacillariophyta	Bacillariophyta_X	Polar-centric-Mediophyceae	Thalassiosira	Unassigned Thalassiosira (Genus)	ASV2734	Eukaryota	Bacillariophyta	Bacillariophyta_X	Radial-centric-basal-Coscinodiscophyceae	Guinardia	Guinardia_delicatula	0.194446	Pos	Protist-Protist
ASV2864	Eukaryota	Bacillariophyta	Bacillariophyta_X	Polar-centric-Mediophyceae	Thalassiosira	Unassigned Thalassiosira (Genus)	ASV1027	Eukaryota	Filosa-Thecofilosea	Ebriida	TAGIRI1-lineage	TAGIRI1-lineage_X	TAGIRI1-lineage_X_sp.	-0.0678564	Neg	Protist-Protist
ASV2869	Eukaryota	Bacillariophyta	Bacillariophyta_X	Polar-centric-Mediophyceae	Unassigned Polar-centric-Mediophyceae (Family)	Unassigned Polar-centric-Mediophyceae (Family)	ASV2468	Eukaryota	Bacillariophyta	Bacillariophyta_X	Polar-centric-Mediophyceae	Chaetoceros	Chaetoceros_danicus	0.0193593	Pos	Protist-Protist
ASV2881	Eukaryota	Bacillariophyta	Bacillariophyta_X	Polar-centric-Mediophyceae	Thalassiosira	Unassigned Thalassiosira (Genus)	ASV2844	Eukaryota	Bacillariophyta	Bacillariophyta_X	Polar-centric-Mediophyceae	Thalassiosira	Unassigned Thalassiosira (Genus)	-0.0810924	Neg	Protist-Protist
ASV2881	Eukaryota	Bacillariophyta	Bacillariophyta_X	Polar-centric-Mediophyceae	Thalassiosira	Unassigned Thalassiosira (Genus)	ASV2826	Eukaryota	Bacillariophyta	Bacillariophyta_X	Polar-centric-Mediophyceae	Unassigned Polar-centric-Mediophyceae (Family)	Unassigned Polar-centric-Mediophyceae (Family)	0.389715	Pos	Protist-Protist
ASV2881	Eukaryota	Bacillariophyta	Bacillariophyta_X	Polar-centric-Mediophyceae	Thalassiosira	Unassigned Thalassiosira (Genus)	ASV2864	Eukaryota	Bacillariophyta	Bacillariophyta_X	Polar-centric-Mediophyceae	Thalassiosira	Unassigned Thalassiosira (Genus)	0.132237	Pos	Protist-Protist
ASV2881	Eukaryota	Bacillariophyta	Bacillariophyta_X	Polar-centric-Mediophyceae	Thalassiosira	Unassigned Thalassiosira (Genus)	ASV2582	Eukaryota	Bacillariophyta	Bacillariophyta_X	Polar-centric-Mediophyceae	Chaetoceros	Chaetoceros_decipiens	-0.187335	Neg	Protist-Protist
ASV2881	Eukaryota	Bacillariophyta	Bacillariophyta_X	Polar-centric-Mediophyceae	Thalassiosira	Unassigned Thalassiosira (Genus)	ASV2700	Eukaryota	Bacillariophyta	Bacillariophyta_X	Radial-centric-basal-Coscinodiscophyceae	Actinocyclus	Actinocyclus_curvatulus	0.0041017	Pos	Protist-Protist
ASV2888	Eukaryota	Bacillariophyta	Bacillariophyta_X	Polar-centric-Mediophyceae	Thalassiosira	Unassigned Thalassiosira (Genus)	ASV2545	Eukaryota	Bacillariophyta	Bacillariophyta_X	Polar-centric-Mediophyceae	Chaetoceros	Unassigned Chaetoceros (Genus)	0.00333154	Pos	Protist-Protist
ASV2888	Eukaryota	Bacillariophyta	Bacillariophyta_X	Polar-centric-Mediophyceae	Thalassiosira	Unassigned Thalassiosira (Genus)	ASV1066	Eukaryota	Filosa-Thecofilosea	Ebriida	Ebriidae	Ebria	Ebria_tripartita	-0.078602	Neg	Protist-Protist
ASV2888	Eukaryota	Bacillariophyta	Bacillariophyta_X	Polar-centric-Mediophyceae	Thalassiosira	Unassigned Thalassiosira (Genus)	ASV842	Eukaryota	Filosa-Thecofilosea	Cryomonadida	Protaspa-lineage	Protaspa-lineage_X	Protaspa-lineage_X_sp.	0.403092	Pos	Protist-Protist
ASV2888	Eukaryota	Bacillariophyta	Bacillariophyta_X	Polar-centric-Mediophyceae	Thalassiosira	Unassigned Thalassiosira (Genus)	ASV2857	Eukaryota	Bacillariophyta	Bacillariophyta_X	Polar-centric-Mediophyceae	Thalassiosira	Thalassiosira_anguste-lineata	-0.0226551	Neg	Protist-Protist
ASV2888	Eukaryota	Bacillariophyta	Bacillariophyta_X	Polar-centric-Mediophyceae	Thalassiosira	Unassigned Thalassiosira (Genus)	ASV2637	Eukaryota	Bacillariophyta	Bacillariophyta_X	Polar-centric-Mediophyceae	Unassigned Polar-centric-Mediophyceae (Family)	Unassigned Polar-centric-Mediophyceae (Family)	0.154995	Pos	Protist-Protist
ASV2888	Eukaryota	Bacillariophyta	Bacillariophyta_X	Polar-centric-Mediophyceae	Thalassiosira	Unassigned Thalassiosira (Genus)	ASV2778	Eukaryota	Bacillariophyta	Bacillariophyta_X	Polar-centric-Mediophyceae	Cyclotella	Cyclotella_sp.	0.167108	Pos	Protist-Protist
ASV2904	Eukaryota	Bacillariophyta	Bacillariophyta_X	Polar-centric-Mediophyceae	Skeletonema	Skeletonema_sp.	ASV2105	Eukaryota	Bacillariophyta	Bacillariophyta_X	Raphid-pennate	Seminavis	Seminavis_sp.	0.103985	Pos	Protist-Protist
ASV2904	Eukaryota	Bacillariophyta	Bacillariophyta_X	Polar-centric-Mediophyceae	Skeletonema	Skeletonema_sp.	ASV2826	Eukaryota	Bacillariophyta	Bacillariophyta_X	Polar-centric-Mediophyceae	Unassigned Polar-centric-Mediophyceae (Family)	Unassigned Polar-centric-Mediophyceae (Family)	0.0243354	Pos	Protist-Protist
ASV2904	Eukaryota	Bacillariophyta	Bacillariophyta_X	Polar-centric-Mediophyceae	Skeletonema	Skeletonema_sp.	ASV842	Eukaryota	Filosa-Thecofilosea	Cryomonadida	Protaspa-lineage	Protaspa-lineage_X	Protaspa-lineage_X_sp.	0.179785	Pos	Protist-Protist
ASV2904	Eukaryota	Bacillariophyta	Bacillariophyta_X	Polar-centric-Mediophyceae	Skeletonema	Skeletonema_sp.	ASV2637	Eukaryota	Bacillariophyta	Bacillariophyta_X	Polar-centric-Mediophyceae	Unassigned Polar-centric-Mediophyceae (Family)	Unassigned Polar-centric-Mediophyceae (Family)	0.0882741	Pos	Protist-Protist
ASV2904	Eukaryota	Bacillariophyta	Bacillariophyta_X	Polar-centric-Mediophyceae	Skeletonema	Skeletonema_sp.	ASV2519	Eukaryota	Bacillariophyta	Bacillariophyta_X	Polar-centric-Mediophyceae	Chaetoceros	Unassigned Chaetoceros (Genus)	0.0557676	Pos	Protist-Protist
ASV2932	Eukaryota	Bacillariophyta	Bacillariophyta_X	Polar-centric-Mediophyceae	Skeletonema	Unassigned Skeletonema (Genus)	ASV2881	Eukaryota	Bacillariophyta	Bacillariophyta_X	Polar-centric-Mediophyceae	Thalassiosira	Unassigned Thalassiosira (Genus)	0.238743	Pos	Protist-Protist
ASV2932	Eukaryota	Bacillariophyta	Bacillariophyta_X	Polar-centric-Mediophyceae	Skeletonema	Unassigned Skeletonema (Genus)	ASV2105	Eukaryota	Bacillariophyta	Bacillariophyta_X	Raphid-pennate	Seminavis	Seminavis_sp.	0.423713	Pos	Protist-Protist
ASV2932	Eukaryota	Bacillariophyta	Bacillariophyta_X	Polar-centric-Mediophyceae	Skeletonema	Unassigned Skeletonema (Genus)	ASV2545	Eukaryota	Bacillariophyta	Bacillariophyta_X	Polar-centric-Mediophyceae	Chaetoceros	Unassigned Chaetoceros (Genus)	0.198203	Pos	Protist-Protist
ASV3507	Eukaryota	MAST-1	MAST-1C	MAST-1C_X	MAST-1C_XX	MAST-1C_XX_sp.	ASV63	Eukaryota	Bacillariophyta	Bacillariophyta_X	Radial-centric-basal-Coscinodiscophyceae	Corethron	Corethron_hystrix	-0.0309388	Neg	Protist-Protist
ASV3537	Eukaryota	MAST-6	MAST-6_X	MAST-6_XX	MAST-6_XXX	MAST-6_XXX_sp.	ASV2844	Eukaryota	Bacillariophyta	Bacillariophyta_X	Polar-centric-Mediophyceae	Thalassiosira	Unassigned Thalassiosira (Genus)	0.0693884	Pos	Protist-Protist
ASV3540	Eukaryota	MAST-6	MAST-6_X	MAST-6_XX	MAST-6_XXX	MAST-6_XXX_sp.	ASV3537	Eukaryota	MAST-6	MAST-6_X	MAST-6_XX	MAST-6_XXX	MAST-6_XXX_sp.	0.0599584	Pos	Protist-Protist
ASV3540	Eukaryota	MAST-6	MAST-6_X	MAST-6_XX	MAST-6_XXX	MAST-6_XXX_sp.	ASV2864	Eukaryota	Bacillariophyta	Bacillariophyta_X	Polar-centric-Mediophyceae	Thalassiosira	Unassigned Thalassiosira (Genus)	-0.0440535	Neg	Protist-Protist
ASV3540	Eukaryota	MAST-6	MAST-6_X	MAST-6_XX	MAST-6_XXX	MAST-6_XXX_sp.	ASV2718	Eukaryota	Bacillariophyta	Bacillariophyta_X	Radial-centric-basal-Coscinodiscophyceae	Coscinodiscus	Coscinodiscus_sp.	-0.0472342	Neg	Protist-Protist
ASV3540	Eukaryota	MAST-6	MAST-6_X	MAST-6_XX	MAST-6_XXX	MAST-6_XXX_sp.	ASV1027	Eukaryota	Filosa-Thecofilosea	Ebriida	TAGIRI1-lineage	TAGIRI1-lineage_X	TAGIRI1-lineage_X_sp.	0.299112	Pos	Protist-Protist
ASV3544	Eukaryota	MAST-6	MAST-6_X	MAST-6_XX	MAST-6_XXX	MAST-6_XXX_sp.	ASV864	Eukaryota	Filosa-Thecofilosea	Cryomonadida	Protaspa-lineage	Protaspa-lineage_X	Protaspa-lineage_X_sp.	-0.0794041	Neg	Protist-Protist
ASV3544	Eukaryota	MAST-6	MAST-6_X	MAST-6_XX	MAST-6_XXX	MAST-6_XXX_sp.	ASV2741	Eukaryota	Bacillariophyta	Bacillariophyta_X	Radial-centric-basal-Coscinodiscophyceae	Rhizosolenia	Rhizosolenia_delicatula	-0.198719	Neg	Protist-Protist
ASV3544	Eukaryota	MAST-6	MAST-6_X	MAST-6_XX	MAST-6_XXX	MAST-6_XXX_sp.	ASV2520	Eukaryota	Bacillariophyta	Bacillariophyta_X	Polar-centric-Mediophyceae	Chaetoceros	Chaetoceros_pumilum	-0.170238	Neg	Protist-Protist
ASV3546	Eukaryota	MAST-6	MAST-6_X	MAST-6_XX	MAST-6_XXX	MAST-6_XXX_sp.	ASV1024	Eukaryota	Filosa-Thecofilosea	Ebriida	TAGIRI1-lineage	TAGIRI1-lineage_X	TAGIRI1-lineage_X_sp.	-0.173876	Neg	Protist-Protist
ASV3546	Eukaryota	MAST-6	MAST-6_X	MAST-6_XX	MAST-6_XXX	MAST-6_XXX_sp.	ASV2826	Eukaryota	Bacillariophyta	Bacillariophyta_X	Polar-centric-Mediophyceae	Unassigned Polar-centric-Mediophyceae (Family)	Unassigned Polar-centric-Mediophyceae (Family)	0.0467309	Pos	Protist-Protist
ASV3546	Eukaryota	MAST-6	MAST-6_X	MAST-6_XX	MAST-6_XXX	MAST-6_XXX_sp.	ASV2932	Eukaryota	Bacillariophyta	Bacillariophyta_X	Polar-centric-Mediophyceae	Skeletonema	Unassigned Skeletonema (Genus)	0.398607	Pos	Protist-Protist
ASV3546	Eukaryota	MAST-6	MAST-6_X	MAST-6_XX	MAST-6_XXX	MAST-6_XXX_sp.	ASV2718	Eukaryota	Bacillariophyta	Bacillariophyta_X	Radial-centric-basal-Coscinodiscophyceae	Coscinodiscus	Coscinodiscus_sp.	0.0161948	Pos	Protist-Protist
ASV3546	Eukaryota	MAST-6	MAST-6_X	MAST-6_XX	MAST-6_XXX	MAST-6_XXX_sp.	ASV2545	Eukaryota	Bacillariophyta	Bacillariophyta_X	Polar-centric-Mediophyceae	Chaetoceros	Unassigned Chaetoceros (Genus)	0.0279203	Pos	Protist-Protist
ASV3761	Eukaryota	Bacillariophyta	Bacillariophyta_X	Polar-centric-Mediophyceae	Chaetoceros	Unassigned Chaetoceros (Genus)	ASV2844	Eukaryota	Bacillariophyta	Bacillariophyta_X	Polar-centric-Mediophyceae	Thalassiosira	Unassigned Thalassiosira (Genus)	0.278628	Pos	Protist-Protist
ASV3761	Eukaryota	Bacillariophyta	Bacillariophyta_X	Polar-centric-Mediophyceae	Chaetoceros	Unassigned Chaetoceros (Genus)	ASV2468	Eukaryota	Bacillariophyta	Bacillariophyta_X	Polar-centric-Mediophyceae	Chaetoceros	Chaetoceros_danicus	0.00653322	Pos	Protist-Protist
ASV3761	Eukaryota	Bacillariophyta	Bacillariophyta_X	Polar-centric-Mediophyceae	Chaetoceros	Unassigned Chaetoceros (Genus)	ASV2920	Eukaryota	Bacillariophyta	Bacillariophyta_X	Polar-centric-Mediophyceae	Skeletonema	Skeletonema_sp.	0.0284345	Pos	Protist-Protist
ASV3761	Eukaryota	Bacillariophyta	Bacillariophyta_X	Polar-centric-Mediophyceae	Chaetoceros	Unassigned Chaetoceros (Genus)	ASV2700	Eukaryota	Bacillariophyta	Bacillariophyta_X	Radial-centric-basal-Coscinodiscophyceae	Actinocyclus	Actinocyclus_curvatulus	-0.263619	Neg	Protist-Protist
ASV4087	Eukaryota	Picozoa_X	Picozoa_XX	Picozoa_XXX	Picozoa_XXXX	Picozoa_XXXX_sp.	ASV2880	Eukaryota	Bacillariophyta	Bacillariophyta_X	Polar-centric-Mediophyceae	Thalassiosira	Unassigned Thalassiosira (Genus)	0.131583	Pos	Protist-Protist
ASV4087	Eukaryota	Picozoa_X	Picozoa_XX	Picozoa_XXX	Picozoa_XXXX	Picozoa_XXXX_sp.	ASV2864	Eukaryota	Bacillariophyta	Bacillariophyta_X	Polar-centric-Mediophyceae	Thalassiosira	Unassigned Thalassiosira (Genus)	0.028586	Pos	Protist-Protist
ASV4087	Eukaryota	Picozoa_X	Picozoa_XX	Picozoa_XXX	Picozoa_XXXX	Picozoa_XXXX_sp.	ASV2869	Eukaryota	Bacillariophyta	Bacillariophyta_X	Polar-centric-Mediophyceae	Unassigned Polar-centric-Mediophyceae (Family)	Unassigned Polar-centric-Mediophyceae (Family)	0.0297051	Pos	Protist-Protist
ASV4087	Eukaryota	Picozoa_X	Picozoa_XX	Picozoa_XXX	Picozoa_XXXX	Picozoa_XXXX_sp.	ASV2823	Eukaryota	Bacillariophyta	Bacillariophyta_X	Polar-centric-Mediophyceae	Thalassiosira	Unassigned Thalassiosira (Genus)	0.0463653	Pos	Protist-Protist
ASV4339	Eukaryota	MAST-12	MAST-12A	MAST-12A_X	MAST-12A_XX	MAST-12A_XX_sp.	ASV2826	Eukaryota	Bacillariophyta	Bacillariophyta_X	Polar-centric-Mediophyceae	Unassigned Polar-centric-Mediophyceae (Family)	Unassigned Polar-centric-Mediophyceae (Family)	0.130523	Pos	Protist-Protist
ASV4339	Eukaryota	MAST-12	MAST-12A	MAST-12A_X	MAST-12A_XX	MAST-12A_XX_sp.	ASV2881	Eukaryota	Bacillariophyta	Bacillariophyta_X	Polar-centric-Mediophyceae	Thalassiosira	Unassigned Thalassiosira (Genus)	0.337601	Pos	Protist-Protist
ASV4675	Eukaryota	Acantharea	Arthracanthida-Symphyacanthida	Arthracanthida-Symphyacanthida_X	Unassigned Arthracanthida-Symphyacanthida_X (Family)	Unassigned Arthracanthida-Symphyacanthida_X (Family)	ASV2858	Eukaryota	Bacillariophyta	Bacillariophyta_X	Polar-centric-Mediophyceae	Unassigned Polar-centric-Mediophyceae (Family)	Unassigned Polar-centric-Mediophyceae (Family)	0.493498	Pos	Protist-Protist
ASV4675	Eukaryota	Acantharea	Arthracanthida-Symphyacanthida	Arthracanthida-Symphyacanthida_X	Unassigned Arthracanthida-Symphyacanthida_X (Family)	Unassigned Arthracanthida-Symphyacanthida_X (Family)	ASV2562	Eukaryota	Bacillariophyta	Bacillariophyta_X	Polar-centric-Mediophyceae	Chaetoceros	Chaetoceros_elegans	-0.0427871	Neg	Protist-Protist
ASV4675	Eukaryota	Acantharea	Arthracanthida-Symphyacanthida	Arthracanthida-Symphyacanthida_X	Unassigned Arthracanthida-Symphyacanthida_X (Family)	Unassigned Arthracanthida-Symphyacanthida_X (Family)	ASV1066	Eukaryota	Filosa-Thecofilosea	Ebriida	Ebriidae	Ebria	Ebria_tripartita	-0.0140206	Neg	Protist-Protist
ASV4675	Eukaryota	Acantharea	Arthracanthida-Symphyacanthida	Arthracanthida-Symphyacanthida_X	Unassigned Arthracanthida-Symphyacanthida_X (Family)	Unassigned Arthracanthida-Symphyacanthida_X (Family)	ASV2582	Eukaryota	Bacillariophyta	Bacillariophyta_X	Polar-centric-Mediophyceae	Chaetoceros	Chaetoceros_decipiens	-0.0303874	Neg	Protist-Protist
ASV4816	Eukaryota	Prymnesiophyceae	Prymnesiales	Chrysochromulinaceae	Chrysochromulina	Chrysochromulina_sp.	ASV1075	Eukaryota	Filosa-Thecofilosea	Ebriida	Ebriidae	Ebria	Ebria_tripartita	0.0388328	Pos	Protist-Protist
ASV4819	Eukaryota	Prymnesiophyceae	Prymnesiales	Chrysochromulinaceae	Chrysochromulina	Chrysochromulina_sp.	ASV2778	Eukaryota	Bacillariophyta	Bacillariophyta_X	Polar-centric-Mediophyceae	Cyclotella	Cyclotella_sp.	0.271283	Pos	Protist-Protist
ASV4819	Eukaryota	Prymnesiophyceae	Prymnesiales	Chrysochromulinaceae	Chrysochromulina	Chrysochromulina_sp.	ASV2772	Eukaryota	Bacillariophyta	Bacillariophyta_X	Polar-centric-Mediophyceae	Cyclotella	Unassigned Cyclotella (Genus)	0.00332782	Pos	Protist-Protist
ASV6246	Eukaryota	Telonemia_X	Telonemia_XX	Telonemia-Group-1	Telonemia-Group-1_X	Telonemia-Group-1_X_sp.	ASV2105	Eukaryota	Bacillariophyta	Bacillariophyta_X	Raphid-pennate	Seminavis	Seminavis_sp.	0.0918116	Pos	Protist-Protist
ASV6274	Eukaryota	Telonemia_X	Telonemia_XX	Telonemia-Group-1	Telonemia-Group-1_X	Telonemia-Group-1_X_sp.	ASV2545	Eukaryota	Bacillariophyta	Bacillariophyta_X	Polar-centric-Mediophyceae	Chaetoceros	Unassigned Chaetoceros (Genus)	0.456486	Pos	Protist-Protist
ASV6274	Eukaryota	Telonemia_X	Telonemia_XX	Telonemia-Group-1	Telonemia-Group-1_X	Telonemia-Group-1_X_sp.	ASV2858	Eukaryota	Bacillariophyta	Bacillariophyta_X	Polar-centric-Mediophyceae	Unassigned Polar-centric-Mediophyceae (Family)	Unassigned Polar-centric-Mediophyceae (Family)	0.0773453	Pos	Protist-Protist
ASV6274	Eukaryota	Telonemia_X	Telonemia_XX	Telonemia-Group-1	Telonemia-Group-1_X	Telonemia-Group-1_X_sp.	ASV4819	Eukaryota	Prymnesiophyceae	Prymnesiales	Chrysochromulinaceae	Chrysochromulina	Chrysochromulina_sp.	0.0480653	Pos	Protist-Protist
ASV6274	Eukaryota	Telonemia_X	Telonemia_XX	Telonemia-Group-1	Telonemia-Group-1_X	Telonemia-Group-1_X_sp.	ASV2864	Eukaryota	Bacillariophyta	Bacillariophyta_X	Polar-centric-Mediophyceae	Thalassiosira	Unassigned Thalassiosira (Genus)	0.0217274	Pos	Protist-Protist
ASV6398	Eukaryota	Katablepharidaceae	Katablepharidales	Katablepharidales_X	Leucocryptos	Leucocryptos_marina	ASV4675	Eukaryota	Acantharea	Arthracanthida-Symphyacanthida	Arthracanthida-Symphyacanthida_X	Unassigned Arthracanthida-Symphyacanthida_X (Family)	Unassigned Arthracanthida-Symphyacanthida_X (Family)	-0.107026	Neg	Protist-Protist
ASV6406	Eukaryota	Katablepharidaceae	Katablepharidales	Katablepharidales_X	Katablepharidales_XX	Katablepharidales_XX_sp.	ASV2860	Eukaryota	Bacillariophyta	Bacillariophyta_X	Polar-centric-Mediophyceae	Thalassiosira	Thalassiosira_mala	0.0863409	Pos	Protist-Protist
ASV6406	Eukaryota	Katablepharidaceae	Katablepharidales	Katablepharidales_X	Katablepharidales_XX	Katablepharidales_XX_sp.	ASV3537	Eukaryota	MAST-6	MAST-6_X	MAST-6_XX	MAST-6_XXX	MAST-6_XXX_sp.	0.322065	Pos	Protist-Protist
ASV6406	Eukaryota	Katablepharidaceae	Katablepharidales	Katablepharidales_X	Katablepharidales_XX	Katablepharidales_XX_sp.	ASV2844	Eukaryota	Bacillariophyta	Bacillariophyta_X	Polar-centric-Mediophyceae	Thalassiosira	Unassigned Thalassiosira (Genus)	0.187231	Pos	Protist-Protist
ASV6438	Eukaryota	Cryptophyceae	Cryptomonadales	Cryptomonadales_X	Unassigned Cryptomonadales_X (Family)	Unassigned Cryptomonadales_X (Family)	ASV3761	Eukaryota	Bacillariophyta	Bacillariophyta_X	Polar-centric-Mediophyceae	Chaetoceros	Unassigned Chaetoceros (Genus)	-0.0436272	Neg	Protist-Protist
ASV6438	Eukaryota	Cryptophyceae	Cryptomonadales	Cryptomonadales_X	Unassigned Cryptomonadales_X (Family)	Unassigned Cryptomonadales_X (Family)	ASV2497	Eukaryota	Bacillariophyta	Bacillariophyta_X	Polar-centric-Mediophyceae	Chaetoceros	Chaetoceros_socialis_debilis	-0.0362123	Neg	Protist-Protist
ASV6438	Eukaryota	Cryptophyceae	Cryptomonadales	Cryptomonadales_X	Unassigned Cryptomonadales_X (Family)	Unassigned Cryptomonadales_X (Family)	ASV2579	Eukaryota	Bacillariophyta	Bacillariophyta_X	Polar-centric-Mediophyceae	Chaetoceros	Unassigned Chaetoceros (Genus)	-0.0616109	Neg	Protist-Protist
ASV6438	Eukaryota	Cryptophyceae	Cryptomonadales	Cryptomonadales_X	Unassigned Cryptomonadales_X (Family)	Unassigned Cryptomonadales_X (Family)	ASV2904	Eukaryota	Bacillariophyta	Bacillariophyta_X	Polar-centric-Mediophyceae	Skeletonema	Skeletonema_sp.	0.0789955	Pos	Protist-Protist
ASV6438	Eukaryota	Cryptophyceae	Cryptomonadales	Cryptomonadales_X	Unassigned Cryptomonadales_X (Family)	Unassigned Cryptomonadales_X (Family)	ASV2920	Eukaryota	Bacillariophyta	Bacillariophyta_X	Polar-centric-Mediophyceae	Skeletonema	Skeletonema_sp.	-0.0264968	Neg	Protist-Protist
ASV6452	Eukaryota	Cryptophyceae	Cryptomonadales	Cryptomonadales_X	Cryptomonadales_XX	Cryptomonadales_XX_sp.	ASV4087	Eukaryota	Picozoa_X	Picozoa_XX	Picozoa_XXX	Picozoa_XXXX	Picozoa_XXXX_sp.	0.0918331	Pos	Protist-Protist
ASV6452	Eukaryota	Cryptophyceae	Cryptomonadales	Cryptomonadales_X	Cryptomonadales_XX	Cryptomonadales_XX_sp.	ASV1075	Eukaryota	Filosa-Thecofilosea	Ebriida	Ebriidae	Ebria	Ebria_tripartita	0.0241755	Pos	Protist-Protist
ASV6453	Eukaryota	Cryptophyceae	Cryptomonadales	Cryptomonadales_X	Plagioselmis	Plagioselmis_prolonga	ASV6452	Eukaryota	Cryptophyceae	Cryptomonadales	Cryptomonadales_X	Cryptomonadales_XX	Cryptomonadales_XX_sp.	0.262856	Pos	Protist-Protist
ASV6486	Eukaryota	Cryptophyceae	Cryptomonadales	Cryptomonadales_X	Falcomonas	Falcomonas_daucoides	ASV2562	Eukaryota	Bacillariophyta	Bacillariophyta_X	Polar-centric-Mediophyceae	Chaetoceros	Chaetoceros_elegans	-0.0601804	Neg	Protist-Protist
ASV6491	Eukaryota	Cryptophyceae	Cryptomonadales	Cryptomonadales_X	Hemiselmis	Hemiselmis_cryptochromatica	ASV2741	Eukaryota	Bacillariophyta	Bacillariophyta_X	Radial-centric-basal-Coscinodiscophyceae	Rhizosolenia	Rhizosolenia_delicatula	-0.0632981	Neg	Protist-Protist
ASV6491	Eukaryota	Cryptophyceae	Cryptomonadales	Cryptomonadales_X	Hemiselmis	Hemiselmis_cryptochromatica	ASV2579	Eukaryota	Bacillariophyta	Bacillariophyta_X	Polar-centric-Mediophyceae	Chaetoceros	Unassigned Chaetoceros (Genus)	-0.02985	Neg	Protist-Protist
ASV6491	Eukaryota	Cryptophyceae	Cryptomonadales	Cryptomonadales_X	Hemiselmis	Hemiselmis_cryptochromatica	ASV2491	Eukaryota	Bacillariophyta	Bacillariophyta_X	Polar-centric-Mediophyceae	Chaetoceros	Chaetoceros_sp_P._quinquecorne_endosymbiont	-0.0967354	Neg	Protist-Protist
ASV6491	Eukaryota	Cryptophyceae	Cryptomonadales	Cryptomonadales_X	Hemiselmis	Hemiselmis_cryptochromatica	ASV2562	Eukaryota	Bacillariophyta	Bacillariophyta_X	Polar-centric-Mediophyceae	Chaetoceros	Chaetoceros_elegans	-0.188277	Neg	Protist-Protist
ASV6491	Eukaryota	Cryptophyceae	Cryptomonadales	Cryptomonadales_X	Hemiselmis	Hemiselmis_cryptochromatica	ASV6486	Eukaryota	Cryptophyceae	Cryptomonadales	Cryptomonadales_X	Falcomonas	Falcomonas_daucoides	0.147694	Pos	Protist-Protist
ASV6512	Eukaryota	Cryptophyceae	Cryptomonadales	Cryptomonadales_X	Teleaulax	Unassigned Teleaulax (Genus)	ASV6491	Eukaryota	Cryptophyceae	Cryptomonadales	Cryptomonadales_X	Hemiselmis	Hemiselmis_cryptochromatica	0.309523	Pos	Protist-Protist
ASV6512	Eukaryota	Cryptophyceae	Cryptomonadales	Cryptomonadales_X	Teleaulax	Unassigned Teleaulax (Genus)	ASV2491	Eukaryota	Bacillariophyta	Bacillariophyta_X	Polar-centric-Mediophyceae	Chaetoceros	Chaetoceros_sp_P._quinquecorne_endosymbiont	-0.00905262	Neg	Protist-Protist
ASV6512	Eukaryota	Cryptophyceae	Cryptomonadales	Cryptomonadales_X	Teleaulax	Unassigned Teleaulax (Genus)	ASV2545	Eukaryota	Bacillariophyta	Bacillariophyta_X	Polar-centric-Mediophyceae	Chaetoceros	Unassigned Chaetoceros (Genus)	0.0779746	Pos	Protist-Protist
ASV6512	Eukaryota	Cryptophyceae	Cryptomonadales	Cryptomonadales_X	Teleaulax	Unassigned Teleaulax (Genus)	ASV2718	Eukaryota	Bacillariophyta	Bacillariophyta_X	Radial-centric-basal-Coscinodiscophyceae	Coscinodiscus	Coscinodiscus_sp.	0.0453526	Pos	Protist-Protist
ASV6517	Eukaryota	Cryptophyceae	Cryptomonadales	Cryptomonadales_X	Teleaulax	Teleaulax_sp.	ASV3540	Eukaryota	MAST-6	MAST-6_X	MAST-6_XX	MAST-6_XXX	MAST-6_XXX_sp.	-0.0902774	Neg	Protist-Protist
ASV6517	Eukaryota	Cryptophyceae	Cryptomonadales	Cryptomonadales_X	Teleaulax	Teleaulax_sp.	ASV2888	Eukaryota	Bacillariophyta	Bacillariophyta_X	Polar-centric-Mediophyceae	Thalassiosira	Unassigned Thalassiosira (Genus)	0.370113	Pos	Protist-Protist
ASV6517	Eukaryota	Cryptophyceae	Cryptomonadales	Cryptomonadales_X	Teleaulax	Teleaulax_sp.	ASV2857	Eukaryota	Bacillariophyta	Bacillariophyta_X	Polar-centric-Mediophyceae	Thalassiosira	Thalassiosira_anguste-lineata	-0.0825257	Neg	Protist-Protist
ASV6517	Eukaryota	Cryptophyceae	Cryptomonadales	Cryptomonadales_X	Teleaulax	Teleaulax_sp.	ASV2858	Eukaryota	Bacillariophyta	Bacillariophyta_X	Polar-centric-Mediophyceae	Unassigned Polar-centric-Mediophyceae (Family)	Unassigned Polar-centric-Mediophyceae (Family)	0.00399506	Pos	Protist-Protist
ASV6517	Eukaryota	Cryptophyceae	Cryptomonadales	Cryptomonadales_X	Teleaulax	Teleaulax_sp.	ASV2860	Eukaryota	Bacillariophyta	Bacillariophyta_X	Polar-centric-Mediophyceae	Thalassiosira	Thalassiosira_mala	-0.0303339	Neg	Protist-Protist
ASV6518	Eukaryota	Cryptophyceae	Cryptomonadales	Cryptomonadales_X	Teleaulax	Unassigned Teleaulax (Genus)	ASV2718	Eukaryota	Bacillariophyta	Bacillariophyta_X	Radial-centric-basal-Coscinodiscophyceae	Coscinodiscus	Coscinodiscus_sp.	0.0888224	Pos	Protist-Protist
ASV6518	Eukaryota	Cryptophyceae	Cryptomonadales	Cryptomonadales_X	Teleaulax	Unassigned Teleaulax (Genus)	ASV4087	Eukaryota	Picozoa_X	Picozoa_XX	Picozoa_XXX	Picozoa_XXXX	Picozoa_XXXX_sp.	0.0344999	Pos	Protist-Protist
ASV6518	Eukaryota	Cryptophyceae	Cryptomonadales	Cryptomonadales_X	Teleaulax	Unassigned Teleaulax (Genus)	ASV2497	Eukaryota	Bacillariophyta	Bacillariophyta_X	Polar-centric-Mediophyceae	Chaetoceros	Chaetoceros_socialis_debilis	-0.0362158	Neg	Protist-Protist
ASV6518	Eukaryota	Cryptophyceae	Cryptomonadales	Cryptomonadales_X	Teleaulax	Unassigned Teleaulax (Genus)	ASV2491	Eukaryota	Bacillariophyta	Bacillariophyta_X	Polar-centric-Mediophyceae	Chaetoceros	Chaetoceros_sp_P._quinquecorne_endosymbiont	-0.0838903	Neg	Protist-Protist
ASV6524	Eukaryota	Cryptophyceae	Cryptomonadales	Cryptomonadales_X	Teleaulax	Unassigned Teleaulax (Genus)	ASV6521	Eukaryota	Cryptophyceae	Cryptomonadales	Cryptomonadales_X	Teleaulax	Unassigned Teleaulax (Genus)	-0.598319	Neg	Protist-Protist
ASV6872	Eukaryota	Nephroselmidophyceae	Nephroselmidales	Nephroselmidales_X	Nephroselmis	Nephroselmis_pyriformis	ASV4675	Eukaryota	Acantharea	Arthracanthida-Symphyacanthida	Arthracanthida-Symphyacanthida_X	Unassigned Arthracanthida-Symphyacanthida_X (Family)	Unassigned Arthracanthida-Symphyacanthida_X (Family)	-0.00712466	Neg	Protist-Protist
ASV6872	Eukaryota	Nephroselmidophyceae	Nephroselmidales	Nephroselmidales_X	Nephroselmis	Nephroselmis_pyriformis	ASV2700	Eukaryota	Bacillariophyta	Bacillariophyta_X	Radial-centric-basal-Coscinodiscophyceae	Actinocyclus	Actinocyclus_curvatulus	-0.406089	Neg	Protist-Protist
ASV6872	Eukaryota	Nephroselmidophyceae	Nephroselmidales	Nephroselmidales_X	Nephroselmis	Nephroselmis_pyriformis	ASV2857	Eukaryota	Bacillariophyta	Bacillariophyta_X	Polar-centric-Mediophyceae	Thalassiosira	Thalassiosira_anguste-lineata	0.124193	Pos	Protist-Protist
ASV6872	Eukaryota	Nephroselmidophyceae	Nephroselmidales	Nephroselmidales_X	Nephroselmis	Nephroselmis_pyriformis	ASV2637	Eukaryota	Bacillariophyta	Bacillariophyta_X	Polar-centric-Mediophyceae	Unassigned Polar-centric-Mediophyceae (Family)	Unassigned Polar-centric-Mediophyceae (Family)	-0.241609	Neg	Protist-Protist
ASV6872	Eukaryota	Nephroselmidophyceae	Nephroselmidales	Nephroselmidales_X	Nephroselmis	Nephroselmis_pyriformis	ASV2888	Eukaryota	Bacillariophyta	Bacillariophyta_X	Polar-centric-Mediophyceae	Thalassiosira	Unassigned Thalassiosira (Genus)	-0.278551	Neg	Protist-Protist
ASV6872	Eukaryota	Nephroselmidophyceae	Nephroselmidales	Nephroselmidales_X	Nephroselmis	Nephroselmis_pyriformis	ASV2582	Eukaryota	Bacillariophyta	Bacillariophyta_X	Polar-centric-Mediophyceae	Chaetoceros	Chaetoceros_decipiens	0.0894685	Pos	Protist-Protist
ASV6872	Eukaryota	Nephroselmidophyceae	Nephroselmidales	Nephroselmidales_X	Nephroselmis	Nephroselmis_pyriformis	ASV2881	Eukaryota	Bacillariophyta	Bacillariophyta_X	Polar-centric-Mediophyceae	Thalassiosira	Unassigned Thalassiosira (Genus)	-0.15581	Neg	Protist-Protist
ASV6910	Eukaryota	Pyramimonadales	Pyramimonadales_X	Pyramimonadales_XX	Unassigned Pyramimonadales_XX (Family)	Unassigned Pyramimonadales_XX (Family)	ASV6406	Eukaryota	Katablepharidaceae	Katablepharidales	Katablepharidales_X	Katablepharidales_XX	Katablepharidales_XX_sp.	0.00564682	Pos	Protist-Protist
ASV6910	Eukaryota	Pyramimonadales	Pyramimonadales_X	Pyramimonadales_XX	Unassigned Pyramimonadales_XX (Family)	Unassigned Pyramimonadales_XX (Family)	ASV1564	Eukaryota	Filosa-Imbricatea	Filosa-Imbricatea_X	Novel-clade-2	Novel-clade-2_X	Novel-clade-2_X_sp.	-0.00331497	Neg	Protist-Protist
ASV6910	Eukaryota	Pyramimonadales	Pyramimonadales_X	Pyramimonadales_XX	Unassigned Pyramimonadales_XX (Family)	Unassigned Pyramimonadales_XX (Family)	ASV2762	Eukaryota	Bacillariophyta	Bacillariophyta_X	Polar-centric-Mediophyceae	Thalassiosira	Thalassiosira_guillardii	0.356637	Pos	Protist-Protist
ASV6926	Eukaryota	Pyramimonadales	Pyramimonadales_X	Pyramimonadales_XX	Unassigned Pyramimonadales_XX (Family)	Unassigned Pyramimonadales_XX (Family)	ASV6453	Eukaryota	Cryptophyceae	Cryptomonadales	Cryptomonadales_X	Plagioselmis	Plagioselmis_prolonga	0.200129	Pos	Protist-Protist
ASV6926	Eukaryota	Pyramimonadales	Pyramimonadales_X	Pyramimonadales_XX	Unassigned Pyramimonadales_XX (Family)	Unassigned Pyramimonadales_XX (Family)	ASV3540	Eukaryota	MAST-6	MAST-6_X	MAST-6_XX	MAST-6_XXX	MAST-6_XXX_sp.	-0.0671494	Neg	Protist-Protist
ASV6926	Eukaryota	Pyramimonadales	Pyramimonadales_X	Pyramimonadales_XX	Unassigned Pyramimonadales_XX (Family)	Unassigned Pyramimonadales_XX (Family)	ASV840	Eukaryota	Filosa-Thecofilosea	Cryomonadida	Protaspa-lineage	Protaspa-lineage_X	Protaspa-lineage_X_sp.	-0.115565	Neg	Protist-Protist
ASV6926	Eukaryota	Pyramimonadales	Pyramimonadales_X	Pyramimonadales_XX	Unassigned Pyramimonadales_XX (Family)	Unassigned Pyramimonadales_XX (Family)	ASV4816	Eukaryota	Prymnesiophyceae	Prymnesiales	Chrysochromulinaceae	Chrysochromulina	Chrysochromulina_sp.	0.0885282	Pos	Protist-Protist
ASV6991	Eukaryota	Mamiellophyceae	Mamiellales	Mamiellaceae	Micromonas	Micromonas_clade_B4	ASV2888	Eukaryota	Bacillariophyta	Bacillariophyta_X	Polar-centric-Mediophyceae	Thalassiosira	Unassigned Thalassiosira (Genus)	0.0196011	Pos	Protist-Protist
ASV6991	Eukaryota	Mamiellophyceae	Mamiellales	Mamiellaceae	Micromonas	Micromonas_clade_B4	ASV2718	Eukaryota	Bacillariophyta	Bacillariophyta_X	Radial-centric-basal-Coscinodiscophyceae	Coscinodiscus	Coscinodiscus_sp.	0.152082	Pos	Protist-Protist
ASV6991	Eukaryota	Mamiellophyceae	Mamiellales	Mamiellaceae	Micromonas	Micromonas_clade_B4	ASV2857	Eukaryota	Bacillariophyta	Bacillariophyta_X	Polar-centric-Mediophyceae	Thalassiosira	Thalassiosira_anguste-lineata	-0.424966	Neg	Protist-Protist
ASV6991	Eukaryota	Mamiellophyceae	Mamiellales	Mamiellaceae	Micromonas	Micromonas_clade_B4	ASV6910	Eukaryota	Pyramimonadales	Pyramimonadales_X	Pyramimonadales_XX	Unassigned Pyramimonadales_XX (Family)	Unassigned Pyramimonadales_XX (Family)	-0.229734	Neg	Protist-Protist
ASV6993	Eukaryota	Mamiellophyceae	Mamiellales	Mamiellaceae	Micromonas	Micromonas_bravo_B1	ASV2880	Eukaryota	Bacillariophyta	Bacillariophyta_X	Polar-centric-Mediophyceae	Thalassiosira	Unassigned Thalassiosira (Genus)	-0.275128	Neg	Protist-Protist
ASV6994	Eukaryota	Mamiellophyceae	Mamiellales	Mamiellaceae	Micromonas	Micromonas_bravo_B1	ASV6926	Eukaryota	Pyramimonadales	Pyramimonadales_X	Pyramimonadales_XX	Unassigned Pyramimonadales_XX (Family)	Unassigned Pyramimonadales_XX (Family)	-0.0687432	Neg	Protist-Protist
ASV6997	Eukaryota	Mamiellophyceae	Mamiellales	Bathycoccaceae	Bathycoccus	Bathycoccus_prasinos	ASV6246	Eukaryota	Telonemia_X	Telonemia_XX	Telonemia-Group-1	Telonemia-Group-1_X	Telonemia-Group-1_X_sp.	-0.287572	Neg	Protist-Protist
ASV6997	Eukaryota	Mamiellophyceae	Mamiellales	Bathycoccaceae	Bathycoccus	Bathycoccus_prasinos	ASV4087	Eukaryota	Picozoa_X	Picozoa_XX	Picozoa_XXX	Picozoa_XXXX	Picozoa_XXXX_sp.	-0.000289532	Neg	Protist-Protist
ASV6997	Eukaryota	Mamiellophyceae	Mamiellales	Bathycoccaceae	Bathycoccus	Bathycoccus_prasinos	ASV6486	Eukaryota	Cryptophyceae	Cryptomonadales	Cryptomonadales_X	Falcomonas	Falcomonas_daucoides	0.0794993	Pos	Protist-Protist
ASV6997	Eukaryota	Mamiellophyceae	Mamiellales	Bathycoccaceae	Bathycoccus	Bathycoccus_prasinos	ASV6406	Eukaryota	Katablepharidaceae	Katablepharidales	Katablepharidales_X	Katablepharidales_XX	Katablepharidales_XX_sp.	-0.216114	Neg	Protist-Protist
ASV7004	Eukaryota	Mamiellophyceae	Mamiellales	Bathycoccaceae	Ostreococcus	Ostreococcus_mediterraneus	ASV2778	Eukaryota	Bacillariophyta	Bacillariophyta_X	Polar-centric-Mediophyceae	Cyclotella	Cyclotella_sp.	-0.068244	Neg	Protist-Protist
ASV7004	Eukaryota	Mamiellophyceae	Mamiellales	Bathycoccaceae	Ostreococcus	Ostreococcus_mediterraneus	ASV6517	Eukaryota	Cryptophyceae	Cryptomonadales	Cryptomonadales_X	Teleaulax	Teleaulax_sp.	-0.0939547	Neg	Protist-Protist
ASV7004	Eukaryota	Mamiellophyceae	Mamiellales	Bathycoccaceae	Ostreococcus	Ostreococcus_mediterraneus	ASV2772	Eukaryota	Bacillariophyta	Bacillariophyta_X	Polar-centric-Mediophyceae	Cyclotella	Unassigned Cyclotella (Genus)	-0.209389	Neg	Protist-Protist
ASV7005	Eukaryota	Mamiellophyceae	Mamiellales	Bathycoccaceae	Ostreococcus	Ostreococcus_mediterraneus	ASV6993	Eukaryota	Mamiellophyceae	Mamiellales	Mamiellaceae	Micromonas	Micromonas_bravo_B1	0.075488	Pos	Protist-Protist
ASV7005	Eukaryota	Mamiellophyceae	Mamiellales	Bathycoccaceae	Ostreococcus	Ostreococcus_mediterraneus	ASV63	Eukaryota	Bacillariophyta	Bacillariophyta_X	Radial-centric-basal-Coscinodiscophyceae	Corethron	Corethron_hystrix	0.211611	Pos	Protist-Protist
ASV7005	Eukaryota	Mamiellophyceae	Mamiellales	Bathycoccaceae	Ostreococcus	Ostreococcus_mediterraneus	ASV2864	Eukaryota	Bacillariophyta	Bacillariophyta_X	Polar-centric-Mediophyceae	Thalassiosira	Unassigned Thalassiosira (Genus)	-0.00601562	Neg	Protist-Protist
ASV7005	Eukaryota	Mamiellophyceae	Mamiellales	Bathycoccaceae	Ostreococcus	Ostreococcus_mediterraneus	ASV6452	Eukaryota	Cryptophyceae	Cryptomonadales	Cryptomonadales_X	Cryptomonadales_XX	Cryptomonadales_XX_sp.	-0.163996	Neg	Protist-Protist
ASV7005	Eukaryota	Mamiellophyceae	Mamiellales	Bathycoccaceae	Ostreococcus	Ostreococcus_mediterraneus	ASV2880	Eukaryota	Bacillariophyta	Bacillariophyta_X	Polar-centric-Mediophyceae	Thalassiosira	Unassigned Thalassiosira (Genus)	-0.222071	Neg	Protist-Protist
ASV7005	Eukaryota	Mamiellophyceae	Mamiellales	Bathycoccaceae	Ostreococcus	Ostreococcus_mediterraneus	ASV2823	Eukaryota	Bacillariophyta	Bacillariophyta_X	Polar-centric-Mediophyceae	Thalassiosira	Unassigned Thalassiosira (Genus)	-0.0448057	Neg	Protist-Protist
ASV7008	Eukaryota	Mamiellophyceae	Mamiellales	Bathycoccaceae	Ostreococcus	Ostreococcus_lucimarinus	ASV7004	Eukaryota	Mamiellophyceae	Mamiellales	Bathycoccaceae	Ostreococcus	Ostreococcus_mediterraneus	0.522291	Pos	Protist-Protist
ASV7008	Eukaryota	Mamiellophyceae	Mamiellales	Bathycoccaceae	Ostreococcus	Ostreococcus_lucimarinus	ASV6994	Eukaryota	Mamiellophyceae	Mamiellales	Mamiellaceae	Micromonas	Micromonas_bravo_B1	0.685957	Pos	Protist-Protist
ASV7008	Eukaryota	Mamiellophyceae	Mamiellales	Bathycoccaceae	Ostreococcus	Ostreococcus_lucimarinus	ASV4087	Eukaryota	Picozoa_X	Picozoa_XX	Picozoa_XXX	Picozoa_XXXX	Picozoa_XXXX_sp.	-0.277034	Neg	Protist-Protist
ASV7008	Eukaryota	Mamiellophyceae	Mamiellales	Bathycoccaceae	Ostreococcus	Ostreococcus_lucimarinus	ASV840	Eukaryota	Filosa-Thecofilosea	Cryomonadida	Protaspa-lineage	Protaspa-lineage_X	Protaspa-lineage_X_sp.	0.329165	Pos	Protist-Protist
ASV7010	Eukaryota	Mamiellophyceae	Mamiellales	Bathycoccaceae	Ostreococcus	Unassigned Ostreococcus (Genus)	ASV2860	Eukaryota	Bacillariophyta	Bacillariophyta_X	Polar-centric-Mediophyceae	Thalassiosira	Thalassiosira_mala	-0.232201	Neg	Protist-Protist
ASV7010	Eukaryota	Mamiellophyceae	Mamiellales	Bathycoccaceae	Ostreococcus	Unassigned Ostreococcus (Genus)	ASV2857	Eukaryota	Bacillariophyta	Bacillariophyta_X	Polar-centric-Mediophyceae	Thalassiosira	Thalassiosira_anguste-lineata	-0.0627883	Neg	Protist-Protist
ASV7010	Eukaryota	Mamiellophyceae	Mamiellales	Bathycoccaceae	Ostreococcus	Unassigned Ostreococcus (Genus)	ASV2497	Eukaryota	Bacillariophyta	Bacillariophyta_X	Polar-centric-Mediophyceae	Chaetoceros	Chaetoceros_socialis_debilis	-0.0886363	Neg	Protist-Protist
ASV7010	Eukaryota	Mamiellophyceae	Mamiellales	Bathycoccaceae	Ostreococcus	Unassigned Ostreococcus (Genus)	ASV2904	Eukaryota	Bacillariophyta	Bacillariophyta_X	Polar-centric-Mediophyceae	Skeletonema	Skeletonema_sp.	0.404188	Pos	Protist-Protist
ASV7010	Eukaryota	Mamiellophyceae	Mamiellales	Bathycoccaceae	Ostreococcus	Unassigned Ostreococcus (Genus)	ASV6406	Eukaryota	Katablepharidaceae	Katablepharidales	Katablepharidales_X	Katablepharidales_XX	Katablepharidales_XX_sp.	-0.351493	Neg	Protist-Protist
ASV7011	Eukaryota	Mamiellophyceae	Mamiellales	Bathycoccaceae	Ostreococcus	Ostreococcus_clade_B	ASV6486	Eukaryota	Cryptophyceae	Cryptomonadales	Cryptomonadales_X	Falcomonas	Falcomonas_daucoides	0.0655567	Pos	Protist-Protist
ASV7011	Eukaryota	Mamiellophyceae	Mamiellales	Bathycoccaceae	Ostreococcus	Ostreococcus_clade_B	ASV2844	Eukaryota	Bacillariophyta	Bacillariophyta_X	Polar-centric-Mediophyceae	Thalassiosira	Unassigned Thalassiosira (Genus)	-0.171858	Neg	Protist-Protist
ASV7011	Eukaryota	Mamiellophyceae	Mamiellales	Bathycoccaceae	Ostreococcus	Ostreococcus_clade_B	ASV6991	Eukaryota	Mamiellophyceae	Mamiellales	Mamiellaceae	Micromonas	Micromonas_clade_B4	0.00391878	Pos	Protist-Protist
ASV7011	Eukaryota	Mamiellophyceae	Mamiellales	Bathycoccaceae	Ostreococcus	Ostreococcus_clade_B	ASV7010	Eukaryota	Mamiellophyceae	Mamiellales	Bathycoccaceae	Ostreococcus	Unassigned Ostreococcus (Genus)	0.649123	Pos	Protist-Protist
ASV7011	Eukaryota	Mamiellophyceae	Mamiellales	Bathycoccaceae	Ostreococcus	Ostreococcus_clade_B	ASV2904	Eukaryota	Bacillariophyta	Bacillariophyta_X	Polar-centric-Mediophyceae	Skeletonema	Skeletonema_sp.	0.0299801	Pos	Protist-Protist
ASV7028	Eukaryota	Mamiellophyceae	Mamiellales	Bathycoccaceae	Ostreococcus	Unassigned Ostreococcus (Genus)	ASV7005	Eukaryota	Mamiellophyceae	Mamiellales	Bathycoccaceae	Ostreococcus	Ostreococcus_mediterraneus	0.157972	Pos	Protist-Protist
ASV7028	Eukaryota	Mamiellophyceae	Mamiellales	Bathycoccaceae	Ostreococcus	Unassigned Ostreococcus (Genus)	ASV7008	Eukaryota	Mamiellophyceae	Mamiellales	Bathycoccaceae	Ostreococcus	Ostreococcus_lucimarinus	0.119987	Pos	Protist-Protist
ASV7028	Eukaryota	Mamiellophyceae	Mamiellales	Bathycoccaceae	Ostreococcus	Unassigned Ostreococcus (Genus)	ASV2869	Eukaryota	Bacillariophyta	Bacillariophyta_X	Polar-centric-Mediophyceae	Unassigned Polar-centric-Mediophyceae (Family)	Unassigned Polar-centric-Mediophyceae (Family)	-0.157838	Neg	Protist-Protist
ASV7028	Eukaryota	Mamiellophyceae	Mamiellales	Bathycoccaceae	Ostreococcus	Unassigned Ostreococcus (Genus)	ASV2858	Eukaryota	Bacillariophyta	Bacillariophyta_X	Polar-centric-Mediophyceae	Unassigned Polar-centric-Mediophyceae (Family)	Unassigned Polar-centric-Mediophyceae (Family)	-0.140544	Neg	Protist-Protist
ASV7028	Eukaryota	Mamiellophyceae	Mamiellales	Bathycoccaceae	Ostreococcus	Unassigned Ostreococcus (Genus)	ASV2823	Eukaryota	Bacillariophyta	Bacillariophyta_X	Polar-centric-Mediophyceae	Thalassiosira	Unassigned Thalassiosira (Genus)	-0.0335294	Neg	Protist-Protist
ASV7089	Eukaryota	Pedinophyceae	Marsupiomonadales	Marsupiomonadaceae	Marsupiomonas	Unassigned Marsupiomonas (Genus)	ASV2497	Eukaryota	Bacillariophyta	Bacillariophyta_X	Polar-centric-Mediophyceae	Chaetoceros	Chaetoceros_socialis_debilis	-0.128451	Neg	Protist-Protist
ASV7089	Eukaryota	Pedinophyceae	Marsupiomonadales	Marsupiomonadaceae	Marsupiomonas	Unassigned Marsupiomonas (Genus)	ASV1024	Eukaryota	Filosa-Thecofilosea	Ebriida	TAGIRI1-lineage	TAGIRI1-lineage_X	TAGIRI1-lineage_X_sp.	-0.226103	Neg	Protist-Protist
ASV7179	Eukaryota	Unassigned Fungi (Division)	Unassigned Fungi (Division)	Unassigned Fungi (Division)	Unassigned Fungi (Division)	Unassigned Fungi (Division)	ASV6453	Eukaryota	Cryptophyceae	Cryptomonadales	Cryptomonadales_X	Plagioselmis	Plagioselmis_prolonga	0.0326447	Pos	Protist-Protist
ASV7179	Eukaryota	Unassigned Fungi (Division)	Unassigned Fungi (Division)	Unassigned Fungi (Division)	Unassigned Fungi (Division)	Unassigned Fungi (Division)	ASV2491	Eukaryota	Bacillariophyta	Bacillariophyta_X	Polar-centric-Mediophyceae	Chaetoceros	Chaetoceros_sp_P._quinquecorne_endosymbiont	-0.0549951	Neg	Protist-Protist
ASV7179	Eukaryota	Unassigned Fungi (Division)	Unassigned Fungi (Division)	Unassigned Fungi (Division)	Unassigned Fungi (Division)	Unassigned Fungi (Division)	ASV6491	Eukaryota	Cryptophyceae	Cryptomonadales	Cryptomonadales_X	Hemiselmis	Hemiselmis_cryptochromatica	0.596684	Pos	Protist-Protist
ASV7179	Eukaryota	Unassigned Fungi (Division)	Unassigned Fungi (Division)	Unassigned Fungi (Division)	Unassigned Fungi (Division)	Unassigned Fungi (Division)	ASV6518	Eukaryota	Cryptophyceae	Cryptomonadales	Cryptomonadales_X	Teleaulax	Unassigned Teleaulax (Genus)	0.16049	Pos	Protist-Protist
ASV7179	Eukaryota	Unassigned Fungi (Division)	Unassigned Fungi (Division)	Unassigned Fungi (Division)	Unassigned Fungi (Division)	Unassigned Fungi (Division)	ASV6926	Eukaryota	Pyramimonadales	Pyramimonadales_X	Pyramimonadales_XX	Unassigned Pyramimonadales_XX (Family)	Unassigned Pyramimonadales_XX (Family)	0.0354005	Pos	Protist-Protist
ASV7181	Eukaryota	Unassigned Fungi (Division)	Unassigned Fungi (Division)	Unassigned Fungi (Division)	Unassigned Fungi (Division)	Unassigned Fungi (Division)	ASV6512	Eukaryota	Cryptophyceae	Cryptomonadales	Cryptomonadales_X	Teleaulax	Unassigned Teleaulax (Genus)	0.00923585	Pos	Protist-Protist
ASV7181	Eukaryota	Unassigned Fungi (Division)	Unassigned Fungi (Division)	Unassigned Fungi (Division)	Unassigned Fungi (Division)	Unassigned Fungi (Division)	ASV6521	Eukaryota	Cryptophyceae	Cryptomonadales	Cryptomonadales_X	Teleaulax	Unassigned Teleaulax (Genus)	-0.0206299	Neg	Protist-Protist
ASV7181	Eukaryota	Unassigned Fungi (Division)	Unassigned Fungi (Division)	Unassigned Fungi (Division)	Unassigned Fungi (Division)	Unassigned Fungi (Division)	ASV6486	Eukaryota	Cryptophyceae	Cryptomonadales	Cryptomonadales_X	Falcomonas	Falcomonas_daucoides	0.038546	Pos	Protist-Protist
ASV7181	Eukaryota	Unassigned Fungi (Division)	Unassigned Fungi (Division)	Unassigned Fungi (Division)	Unassigned Fungi (Division)	Unassigned Fungi (Division)	ASV2579	Eukaryota	Bacillariophyta	Bacillariophyta_X	Polar-centric-Mediophyceae	Chaetoceros	Unassigned Chaetoceros (Genus)	-0.00976347	Neg	Protist-Protist
ASV7181	Eukaryota	Unassigned Fungi (Division)	Unassigned Fungi (Division)	Unassigned Fungi (Division)	Unassigned Fungi (Division)	Unassigned Fungi (Division)	ASV2468	Eukaryota	Bacillariophyta	Bacillariophyta_X	Polar-centric-Mediophyceae	Chaetoceros	Chaetoceros_danicus	-0.147179	Neg	Protist-Protist
ASV7181	Eukaryota	Unassigned Fungi (Division)	Unassigned Fungi (Division)	Unassigned Fungi (Division)	Unassigned Fungi (Division)	Unassigned Fungi (Division)	ASV6491	Eukaryota	Cryptophyceae	Cryptomonadales	Cryptomonadales_X	Hemiselmis	Hemiselmis_cryptochromatica	0.463547	Pos	Protist-Protist
ASV7181	Eukaryota	Unassigned Fungi (Division)	Unassigned Fungi (Division)	Unassigned Fungi (Division)	Unassigned Fungi (Division)	Unassigned Fungi (Division)	ASV2491	Eukaryota	Bacillariophyta	Bacillariophyta_X	Polar-centric-Mediophyceae	Chaetoceros	Chaetoceros_sp_P._quinquecorne_endosymbiont	-0.0779404	Neg	Protist-Protist
ASV7194	Eukaryota	Fungi_X	Fungi_XX	Fungi_XXX	Fungi_XXXX	Fungi_XXXX_sp.	ASV6438	Eukaryota	Cryptophyceae	Cryptomonadales	Cryptomonadales_X	Unassigned Cryptomonadales_X (Family)	Unassigned Cryptomonadales_X (Family)	0.520205	Pos	Protist-Protist
ASV7194	Eukaryota	Fungi_X	Fungi_XX	Fungi_XXX	Fungi_XXXX	Fungi_XXXX_sp.	ASV2579	Eukaryota	Bacillariophyta	Bacillariophyta_X	Polar-centric-Mediophyceae	Chaetoceros	Unassigned Chaetoceros (Genus)	-0.002514	Neg	Protist-Protist
ASV7234	Eukaryota	Bacillariophyta	Bacillariophyta_X	Polar-centric-Mediophyceae	Chaetoceros	Chaetoceros_debilis_3	ASV6518	Eukaryota	Cryptophyceae	Cryptomonadales	Cryptomonadales_X	Teleaulax	Unassigned Teleaulax (Genus)	-0.245316	Neg	Protist-Protist
ASV7234	Eukaryota	Bacillariophyta	Bacillariophyta_X	Polar-centric-Mediophyceae	Chaetoceros	Chaetoceros_debilis_3	ASV3761	Eukaryota	Bacillariophyta	Bacillariophyta_X	Polar-centric-Mediophyceae	Chaetoceros	Unassigned Chaetoceros (Genus)	0.064857	Pos	Protist-Protist
ASV7234	Eukaryota	Bacillariophyta	Bacillariophyta_X	Polar-centric-Mediophyceae	Chaetoceros	Chaetoceros_debilis_3	ASV6910	Eukaryota	Pyramimonadales	Pyramimonadales_X	Pyramimonadales_XX	Unassigned Pyramimonadales_XX (Family)	Unassigned Pyramimonadales_XX (Family)	0.373051	Pos	Protist-Protist
ASV7234	Eukaryota	Bacillariophyta	Bacillariophyta_X	Polar-centric-Mediophyceae	Chaetoceros	Chaetoceros_debilis_3	ASV2491	Eukaryota	Bacillariophyta	Bacillariophyta_X	Polar-centric-Mediophyceae	Chaetoceros	Chaetoceros_sp_P._quinquecorne_endosymbiont	0.159607	Pos	Protist-Protist
ASV7234	Eukaryota	Bacillariophyta	Bacillariophyta_X	Polar-centric-Mediophyceae	Chaetoceros	Chaetoceros_debilis_3	ASV2888	Eukaryota	Bacillariophyta	Bacillariophyta_X	Polar-centric-Mediophyceae	Thalassiosira	Unassigned Thalassiosira (Genus)	-0.209202	Neg	Protist-Protist
ASV7234	Eukaryota	Bacillariophyta	Bacillariophyta_X	Polar-centric-Mediophyceae	Chaetoceros	Chaetoceros_debilis_3	ASV6872	Eukaryota	Nephroselmidophyceae	Nephroselmidales	Nephroselmidales_X	Nephroselmis	Nephroselmis_pyriformis	0.0149693	Pos	Protist-Protist
ASV7596	Eukaryota	CONThreeP	CONThreeP_X	CONThreeP_XX	Askenasia	Askenasia_sp.	ASV2904	Eukaryota	Bacillariophyta	Bacillariophyta_X	Polar-centric-Mediophyceae	Skeletonema	Skeletonema_sp.	-0.0831788	Neg	Protist-Protist
ASV7596	Eukaryota	CONThreeP	CONThreeP_X	CONThreeP_XX	Askenasia	Askenasia_sp.	ASV2920	Eukaryota	Bacillariophyta	Bacillariophyta_X	Polar-centric-Mediophyceae	Skeletonema	Skeletonema_sp.	0.00383783	Pos	Protist-Protist
ASV7596	Eukaryota	CONThreeP	CONThreeP_X	CONThreeP_XX	Askenasia	Askenasia_sp.	ASV3761	Eukaryota	Bacillariophyta	Bacillariophyta_X	Polar-centric-Mediophyceae	Chaetoceros	Unassigned Chaetoceros (Genus)	0.0898842	Pos	Protist-Protist
ASV7596	Eukaryota	CONThreeP	CONThreeP_X	CONThreeP_XX	Askenasia	Askenasia_sp.	ASV2932	Eukaryota	Bacillariophyta	Bacillariophyta_X	Polar-centric-Mediophyceae	Skeletonema	Unassigned Skeletonema (Genus)	-0.238242	Neg	Protist-Protist
ASV7596	Eukaryota	CONThreeP	CONThreeP_X	CONThreeP_XX	Askenasia	Askenasia_sp.	ASV2844	Eukaryota	Bacillariophyta	Bacillariophyta_X	Polar-centric-Mediophyceae	Thalassiosira	Unassigned Thalassiosira (Genus)	0.0315481	Pos	Protist-Protist
ASV7596	Eukaryota	CONThreeP	CONThreeP_X	CONThreeP_XX	Askenasia	Askenasia_sp.	ASV2888	Eukaryota	Bacillariophyta	Bacillariophyta_X	Polar-centric-Mediophyceae	Thalassiosira	Unassigned Thalassiosira (Genus)	-0.0104007	Neg	Protist-Protist
ASV7596	Eukaryota	CONThreeP	CONThreeP_X	CONThreeP_XX	Askenasia	Askenasia_sp.	ASV7234	Eukaryota	Bacillariophyta	Bacillariophyta_X	Polar-centric-Mediophyceae	Chaetoceros	Chaetoceros_debilis_3	0.191476	Pos	Protist-Protist
ASV7676	Eukaryota	Spirotrichea	Strombidiida	Strombidiidae_R	Strombidium_R	Strombidium_R_sp.	ASV6486	Eukaryota	Cryptophyceae	Cryptomonadales	Cryptomonadales_X	Falcomonas	Falcomonas_daucoides	0.113915	Pos	Protist-Protist
ASV7676	Eukaryota	Spirotrichea	Strombidiida	Strombidiidae_R	Strombidium_R	Strombidium_R_sp.	ASV6491	Eukaryota	Cryptophyceae	Cryptomonadales	Cryptomonadales_X	Hemiselmis	Hemiselmis_cryptochromatica	0.0307108	Pos	Protist-Protist
ASV7676	Eukaryota	Spirotrichea	Strombidiida	Strombidiidae_R	Strombidium_R	Strombidium_R_sp.	ASV6512	Eukaryota	Cryptophyceae	Cryptomonadales	Cryptomonadales_X	Teleaulax	Unassigned Teleaulax (Genus)	0.017438	Pos	Protist-Protist
ASV7678	Eukaryota	Spirotrichea	Strombidiida	Strombidiidae_R	Strombidium_R	Strombidium_R_sp.	ASV3537	Eukaryota	MAST-6	MAST-6_X	MAST-6_XX	MAST-6_XXX	MAST-6_XXX_sp.	-0.0963466	Neg	Protist-Protist
ASV7678	Eukaryota	Spirotrichea	Strombidiida	Strombidiidae_R	Strombidium_R	Strombidium_R_sp.	ASV6246	Eukaryota	Telonemia_X	Telonemia_XX	Telonemia-Group-1	Telonemia-Group-1_X	Telonemia-Group-1_X_sp.	-0.264783	Neg	Protist-Protist
ASV7678	Eukaryota	Spirotrichea	Strombidiida	Strombidiidae_R	Strombidium_R	Strombidium_R_sp.	ASV2849	Eukaryota	Bacillariophyta	Bacillariophyta_X	Polar-centric-Mediophyceae	Thalassiosira	Unassigned Thalassiosira (Genus)	-0.359596	Neg	Protist-Protist
ASV7722	Eukaryota	Spirotrichea	Strombidiida	Strombidiidae_K	Strombidium_K	Strombidium_capitatum	ASV7010	Eukaryota	Mamiellophyceae	Mamiellales	Bathycoccaceae	Ostreococcus	Unassigned Ostreococcus (Genus)	0.33914	Pos	Protist-Protist
ASV7722	Eukaryota	Spirotrichea	Strombidiida	Strombidiidae_K	Strombidium_K	Strombidium_capitatum	ASV2582	Eukaryota	Bacillariophyta	Bacillariophyta_X	Polar-centric-Mediophyceae	Chaetoceros	Chaetoceros_decipiens	-0.00354332	Neg	Protist-Protist
ASV7722	Eukaryota	Spirotrichea	Strombidiida	Strombidiidae_K	Strombidium_K	Strombidium_capitatum	ASV7089	Eukaryota	Pedinophyceae	Marsupiomonadales	Marsupiomonadaceae	Marsupiomonas	Unassigned Marsupiomonas (Genus)	0.247347	Pos	Protist-Protist
ASV7726	Eukaryota	Spirotrichea	Strombidiida	Strombidiidae_K	Strombidium_K	Strombidium_K_sp.	ASV6398	Eukaryota	Katablepharidaceae	Katablepharidales	Katablepharidales_X	Leucocryptos	Leucocryptos_marina	-0.115073	Neg	Protist-Protist
ASV7726	Eukaryota	Spirotrichea	Strombidiida	Strombidiidae_K	Strombidium_K	Strombidium_K_sp.	ASV2520	Eukaryota	Bacillariophyta	Bacillariophyta_X	Polar-centric-Mediophyceae	Chaetoceros	Chaetoceros_pumilum	-0.0859302	Neg	Protist-Protist
ASV7726	Eukaryota	Spirotrichea	Strombidiida	Strombidiidae_K	Strombidium_K	Strombidium_K_sp.	ASV6491	Eukaryota	Cryptophyceae	Cryptomonadales	Cryptomonadales_X	Hemiselmis	Hemiselmis_cryptochromatica	0.0814811	Pos	Protist-Protist
ASV7726	Eukaryota	Spirotrichea	Strombidiida	Strombidiidae_K	Strombidium_K	Strombidium_K_sp.	ASV4675	Eukaryota	Acantharea	Arthracanthida-Symphyacanthida	Arthracanthida-Symphyacanthida_X	Unassigned Arthracanthida-Symphyacanthida_X (Family)	Unassigned Arthracanthida-Symphyacanthida_X (Family)	0.133138	Pos	Protist-Protist
ASV7726	Eukaryota	Spirotrichea	Strombidiida	Strombidiidae_K	Strombidium_K	Strombidium_K_sp.	ASV1564	Eukaryota	Filosa-Imbricatea	Filosa-Imbricatea_X	Novel-clade-2	Novel-clade-2_X	Novel-clade-2_X_sp.	0.0278793	Pos	Protist-Protist
ASV7744	Eukaryota	Spirotrichea	Strombidiida	Strombidiidae	Spirostrombidium	Spirostrombidium_agathae	ASV6486	Eukaryota	Cryptophyceae	Cryptomonadales	Cryptomonadales_X	Falcomonas	Falcomonas_daucoides	0.283346	Pos	Protist-Protist
ASV7770	Eukaryota	Spirotrichea	Strombidiida	Strombidiidae_M	Strombidium_M	Strombidium_M_sp.	ASV6993	Eukaryota	Mamiellophyceae	Mamiellales	Mamiellaceae	Micromonas	Micromonas_bravo_B1	0.0746736	Pos	Protist-Protist
ASV7787	Eukaryota	Spirotrichea	Strombidiida	Strombidiidae	Strombidium	Strombidium_sp.	ASV6438	Eukaryota	Cryptophyceae	Cryptomonadales	Cryptomonadales_X	Unassigned Cryptomonadales_X (Family)	Unassigned Cryptomonadales_X (Family)	-0.115984	Neg	Protist-Protist
ASV7787	Eukaryota	Spirotrichea	Strombidiida	Strombidiidae	Strombidium	Strombidium_sp.	ASV2932	Eukaryota	Bacillariophyta	Bacillariophyta_X	Polar-centric-Mediophyceae	Skeletonema	Unassigned Skeletonema (Genus)	-0.187561	Neg	Protist-Protist
ASV7787	Eukaryota	Spirotrichea	Strombidiida	Strombidiidae	Strombidium	Strombidium_sp.	ASV2904	Eukaryota	Bacillariophyta	Bacillariophyta_X	Polar-centric-Mediophyceae	Skeletonema	Skeletonema_sp.	-0.0171964	Neg	Protist-Protist
ASV7787	Eukaryota	Spirotrichea	Strombidiida	Strombidiidae	Strombidium	Strombidium_sp.	ASV2844	Eukaryota	Bacillariophyta	Bacillariophyta_X	Polar-centric-Mediophyceae	Thalassiosira	Unassigned Thalassiosira (Genus)	0.128814	Pos	Protist-Protist
ASV7793	Eukaryota	Spirotrichea	Strombidiida_B	Strombidiida_B_X	Strombidiida_B_XX	Strombidiida_B_XX_sp.	ASV1066	Eukaryota	Filosa-Thecofilosea	Ebriida	Ebriidae	Ebria	Ebria_tripartita	-0.116564	Neg	Protist-Protist
ASV7793	Eukaryota	Spirotrichea	Strombidiida_B	Strombidiida_B_X	Strombidiida_B_XX	Strombidiida_B_XX_sp.	ASV4339	Eukaryota	MAST-12	MAST-12A	MAST-12A_X	MAST-12A_XX	MAST-12A_XX_sp.	0.00654088	Pos	Protist-Protist
ASV7793	Eukaryota	Spirotrichea	Strombidiida_B	Strombidiida_B_X	Strombidiida_B_XX	Strombidiida_B_XX_sp.	ASV2520	Eukaryota	Bacillariophyta	Bacillariophyta_X	Polar-centric-Mediophyceae	Chaetoceros	Chaetoceros_pumilum	-0.0638273	Neg	Protist-Protist
ASV7793	Eukaryota	Spirotrichea	Strombidiida_B	Strombidiida_B_X	Strombidiida_B_XX	Strombidiida_B_XX_sp.	ASV6274	Eukaryota	Telonemia_X	Telonemia_XX	Telonemia-Group-1	Telonemia-Group-1_X	Telonemia-Group-1_X_sp.	0.0021101	Pos	Protist-Protist
ASV7793	Eukaryota	Spirotrichea	Strombidiida_B	Strombidiida_B_X	Strombidiida_B_XX	Strombidiida_B_XX_sp.	ASV2734	Eukaryota	Bacillariophyta	Bacillariophyta_X	Radial-centric-basal-Coscinodiscophyceae	Guinardia	Guinardia_delicatula	0.116876	Pos	Protist-Protist
ASV7805	Eukaryota	Spirotrichea	Strombidiida	Strombidiidae	Unassigned Strombidiidae (Family)	Unassigned Strombidiidae (Family)	ASV7744	Eukaryota	Spirotrichea	Strombidiida	Strombidiidae	Spirostrombidium	Spirostrombidium_agathae	0.381999	Pos	Protist-Protist
ASV7805	Eukaryota	Spirotrichea	Strombidiida	Strombidiidae	Unassigned Strombidiidae (Family)	Unassigned Strombidiidae (Family)	ASV864	Eukaryota	Filosa-Thecofilosea	Cryomonadida	Protaspa-lineage	Protaspa-lineage_X	Protaspa-lineage_X_sp.	0.428319	Pos	Protist-Protist
ASV7814	Eukaryota	Spirotrichea	Strombidiida	Strombidiidae	Spirostrombidium	Spirostrombidium_agathae	ASV6512	Eukaryota	Cryptophyceae	Cryptomonadales	Cryptomonadales_X	Teleaulax	Unassigned Teleaulax (Genus)	-0.277833	Neg	Protist-Protist
ASV7814	Eukaryota	Spirotrichea	Strombidiida	Strombidiidae	Spirostrombidium	Spirostrombidium_agathae	ASV4816	Eukaryota	Prymnesiophyceae	Prymnesiales	Chrysochromulinaceae	Chrysochromulina	Chrysochromulina_sp.	0.0322784	Pos	Protist-Protist
ASV7877	Eukaryota	Spirotrichea	Tintinnida	TIN_11	TIN_11_X	TIN_11_X_sp.	ASV7726	Eukaryota	Spirotrichea	Strombidiida	Strombidiidae_K	Strombidium_K	Strombidium_K_sp.	-0.146417	Neg	Protist-Protist
ASV7877	Eukaryota	Spirotrichea	Tintinnida	TIN_11	TIN_11_X	TIN_11_X_sp.	ASV7089	Eukaryota	Pedinophyceae	Marsupiomonadales	Marsupiomonadaceae	Marsupiomonas	Unassigned Marsupiomonas (Genus)	-0.252983	Neg	Protist-Protist
ASV7877	Eukaryota	Spirotrichea	Tintinnida	TIN_11	TIN_11_X	TIN_11_X_sp.	ASV7011	Eukaryota	Mamiellophyceae	Mamiellales	Bathycoccaceae	Ostreococcus	Ostreococcus_clade_B	-0.101692	Neg	Protist-Protist
ASV7877	Eukaryota	Spirotrichea	Tintinnida	TIN_11	TIN_11_X	TIN_11_X_sp.	ASV7722	Eukaryota	Spirotrichea	Strombidiida	Strombidiidae_K	Strombidium_K	Strombidium_capitatum	-0.0455057	Neg	Protist-Protist
ASV7877	Eukaryota	Spirotrichea	Tintinnida	TIN_11	TIN_11_X	TIN_11_X_sp.	ASV2497	Eukaryota	Bacillariophyta	Bacillariophyta_X	Polar-centric-Mediophyceae	Chaetoceros	Chaetoceros_socialis_debilis	0.00745238	Pos	Protist-Protist
ASV7892	Eukaryota	Spirotrichea	Tintinnida	TIN_04	Tintinnopsis_04	Tintinnopsis_parvula	ASV2844	Eukaryota	Bacillariophyta	Bacillariophyta_X	Polar-centric-Mediophyceae	Thalassiosira	Unassigned Thalassiosira (Genus)	0.190127	Pos	Protist-Protist
ASV7892	Eukaryota	Spirotrichea	Tintinnida	TIN_04	Tintinnopsis_04	Tintinnopsis_parvula	ASV842	Eukaryota	Filosa-Thecofilosea	Cryomonadida	Protaspa-lineage	Protaspa-lineage_X	Protaspa-lineage_X_sp.	-0.0584019	Neg	Protist-Protist
ASV7892	Eukaryota	Spirotrichea	Tintinnida	TIN_04	Tintinnopsis_04	Tintinnopsis_parvula	ASV6872	Eukaryota	Nephroselmidophyceae	Nephroselmidales	Nephroselmidales_X	Nephroselmis	Nephroselmis_pyriformis	0.269035	Pos	Protist-Protist
ASV7901	Eukaryota	Spirotrichea	Tintinnida	TIN_05	Tintinnopsis_05	Unassigned Tintinnopsis_05 (Genus)	ASV3546	Eukaryota	MAST-6	MAST-6_X	MAST-6_XX	MAST-6_XXX	MAST-6_XXX_sp.	-0.0571514	Neg	Protist-Protist
ASV7901	Eukaryota	Spirotrichea	Tintinnida	TIN_05	Tintinnopsis_05	Unassigned Tintinnopsis_05 (Genus)	ASV3544	Eukaryota	MAST-6	MAST-6_X	MAST-6_XX	MAST-6_XXX	MAST-6_XXX_sp.	-0.0208568	Neg	Protist-Protist
ASV7901	Eukaryota	Spirotrichea	Tintinnida	TIN_05	Tintinnopsis_05	Unassigned Tintinnopsis_05 (Genus)	ASV7089	Eukaryota	Pedinophyceae	Marsupiomonadales	Marsupiomonadaceae	Marsupiomonas	Unassigned Marsupiomonas (Genus)	-0.12551	Neg	Protist-Protist
ASV7901	Eukaryota	Spirotrichea	Tintinnida	TIN_05	Tintinnopsis_05	Unassigned Tintinnopsis_05 (Genus)	ASV6438	Eukaryota	Cryptophyceae	Cryptomonadales	Cryptomonadales_X	Unassigned Cryptomonadales_X (Family)	Unassigned Cryptomonadales_X (Family)	-0.0761963	Neg	Protist-Protist
ASV7912	Eukaryota	Spirotrichea	Tintinnida	TIN_07	Tintinnopsis_07	Unassigned Tintinnopsis_07 (Genus)	ASV2468	Eukaryota	Bacillariophyta	Bacillariophyta_X	Polar-centric-Mediophyceae	Chaetoceros	Chaetoceros_danicus	0.153395	Pos	Protist-Protist
ASV7912	Eukaryota	Spirotrichea	Tintinnida	TIN_07	Tintinnopsis_07	Unassigned Tintinnopsis_07 (Genus)	ASV3544	Eukaryota	MAST-6	MAST-6_X	MAST-6_XX	MAST-6_XXX	MAST-6_XXX_sp.	-0.027799	Neg	Protist-Protist
ASV7912	Eukaryota	Spirotrichea	Tintinnida	TIN_07	Tintinnopsis_07	Unassigned Tintinnopsis_07 (Genus)	ASV3507	Eukaryota	MAST-1	MAST-1C	MAST-1C_X	MAST-1C_XX	MAST-1C_XX_sp.	0.15785	Pos	Protist-Protist
ASV7912	Eukaryota	Spirotrichea	Tintinnida	TIN_07	Tintinnopsis_07	Unassigned Tintinnopsis_07 (Genus)	ASV7787	Eukaryota	Spirotrichea	Strombidiida	Strombidiidae	Strombidium	Strombidium_sp.	0.166997	Pos	Protist-Protist
ASV7912	Eukaryota	Spirotrichea	Tintinnida	TIN_07	Tintinnopsis_07	Unassigned Tintinnopsis_07 (Genus)	ASV7814	Eukaryota	Spirotrichea	Strombidiida	Strombidiidae	Spirostrombidium	Spirostrombidium_agathae	0.184934	Pos	Protist-Protist
ASV7912	Eukaryota	Spirotrichea	Tintinnida	TIN_07	Tintinnopsis_07	Unassigned Tintinnopsis_07 (Genus)	ASV2741	Eukaryota	Bacillariophyta	Bacillariophyta_X	Radial-centric-basal-Coscinodiscophyceae	Rhizosolenia	Rhizosolenia_delicatula	0.192836	Pos	Protist-Protist
ASV7912	Eukaryota	Spirotrichea	Tintinnida	TIN_07	Tintinnopsis_07	Unassigned Tintinnopsis_07 (Genus)	ASV2920	Eukaryota	Bacillariophyta	Bacillariophyta_X	Polar-centric-Mediophyceae	Skeletonema	Skeletonema_sp.	0.332026	Pos	Protist-Protist
ASV7912	Eukaryota	Spirotrichea	Tintinnida	TIN_07	Tintinnopsis_07	Unassigned Tintinnopsis_07 (Genus)	ASV2826	Eukaryota	Bacillariophyta	Bacillariophyta_X	Polar-centric-Mediophyceae	Unassigned Polar-centric-Mediophyceae (Family)	Unassigned Polar-centric-Mediophyceae (Family)	-0.112809	Neg	Protist-Protist
ASV8048	Eukaryota	Spirotrichea	Tintinnida	Tintinnidiidae	Tintinnidium	Unassigned Tintinnidium (Genus)	ASV3537	Eukaryota	MAST-6	MAST-6_X	MAST-6_XX	MAST-6_XXX	MAST-6_XXX_sp.	0.299916	Pos	Protist-Protist
ASV8061	Eukaryota	Spirotrichea	Choreotrichida	Strombidinopsidae	Parastrombidinopsis	Unassigned Parastrombidinopsis (Genus)	ASV840	Eukaryota	Filosa-Thecofilosea	Cryomonadida	Protaspa-lineage	Protaspa-lineage_X	Protaspa-lineage_X_sp.	0.254376	Pos	Protist-Protist
ASV8061	Eukaryota	Spirotrichea	Choreotrichida	Strombidinopsidae	Parastrombidinopsis	Unassigned Parastrombidinopsis (Genus)	ASV6991	Eukaryota	Mamiellophyceae	Mamiellales	Mamiellaceae	Micromonas	Micromonas_clade_B4	-0.145593	Neg	Protist-Protist
ASV8065	Eukaryota	Spirotrichea	Choreotrichida	Strombidinopsidae	Strombidinopsis	Strombidinopsis_sp.	ASV3544	Eukaryota	MAST-6	MAST-6_X	MAST-6_XX	MAST-6_XXX	MAST-6_XXX_sp.	0.04231	Pos	Protist-Protist
ASV8065	Eukaryota	Spirotrichea	Choreotrichida	Strombidinopsidae	Strombidinopsis	Strombidinopsis_sp.	ASV6512	Eukaryota	Cryptophyceae	Cryptomonadales	Cryptomonadales_X	Teleaulax	Unassigned Teleaulax (Genus)	0.212864	Pos	Protist-Protist
ASV8065	Eukaryota	Spirotrichea	Choreotrichida	Strombidinopsidae	Strombidinopsis	Strombidinopsis_sp.	ASV7676	Eukaryota	Spirotrichea	Strombidiida	Strombidiidae_R	Strombidium_R	Strombidium_R_sp.	0.00159958	Pos	Protist-Protist
ASV8065	Eukaryota	Spirotrichea	Choreotrichida	Strombidinopsidae	Strombidinopsis	Strombidinopsis_sp.	ASV7912	Eukaryota	Spirotrichea	Tintinnida	TIN_07	Tintinnopsis_07	Unassigned Tintinnopsis_07 (Genus)	-0.0403983	Neg	Protist-Protist
ASV8065	Eukaryota	Spirotrichea	Choreotrichida	Strombidinopsidae	Strombidinopsis	Strombidinopsis_sp.	ASV7726	Eukaryota	Spirotrichea	Strombidiida	Strombidiidae_K	Strombidium_K	Strombidium_K_sp.	0.0185677	Pos	Protist-Protist
ASV8116	Eukaryota	Spirotrichea	Choreotrichida	Strobilidiidae_I	Pelagostrobilidium	Pelagostrobilidium_neptuni	ASV4087	Eukaryota	Picozoa_X	Picozoa_XX	Picozoa_XXX	Picozoa_XXXX	Picozoa_XXXX_sp.	-0.00988947	Neg	Protist-Protist
ASV8116	Eukaryota	Spirotrichea	Choreotrichida	Strobilidiidae_I	Pelagostrobilidium	Pelagostrobilidium_neptuni	ASV2491	Eukaryota	Bacillariophyta	Bacillariophyta_X	Polar-centric-Mediophyceae	Chaetoceros	Chaetoceros_sp_P._quinquecorne_endosymbiont	0.0977256	Pos	Protist-Protist
ASV8116	Eukaryota	Spirotrichea	Choreotrichida	Strobilidiidae_I	Pelagostrobilidium	Pelagostrobilidium_neptuni	ASV8065	Eukaryota	Spirotrichea	Choreotrichida	Strombidinopsidae	Strombidinopsis	Strombidinopsis_sp.	0.0234804	Pos	Protist-Protist
ASV8116	Eukaryota	Spirotrichea	Choreotrichida	Strobilidiidae_I	Pelagostrobilidium	Pelagostrobilidium_neptuni	ASV2519	Eukaryota	Bacillariophyta	Bacillariophyta_X	Polar-centric-Mediophyceae	Chaetoceros	Unassigned Chaetoceros (Genus)	-0.0284424	Neg	Protist-Protist
ASV8116	Eukaryota	Spirotrichea	Choreotrichida	Strobilidiidae_I	Pelagostrobilidium	Pelagostrobilidium_neptuni	ASV6926	Eukaryota	Pyramimonadales	Pyramimonadales_X	Pyramimonadales_XX	Unassigned Pyramimonadales_XX (Family)	Unassigned Pyramimonadales_XX (Family)	-0.0114974	Neg	Protist-Protist
ASV8116	Eukaryota	Spirotrichea	Choreotrichida	Strobilidiidae_I	Pelagostrobilidium	Pelagostrobilidium_neptuni	ASV6518	Eukaryota	Cryptophyceae	Cryptomonadales	Cryptomonadales_X	Teleaulax	Unassigned Teleaulax (Genus)	-0.193484	Neg	Protist-Protist
ASV8116	Eukaryota	Spirotrichea	Choreotrichida	Strobilidiidae_I	Pelagostrobilidium	Pelagostrobilidium_neptuni	ASV6910	Eukaryota	Pyramimonadales	Pyramimonadales_X	Pyramimonadales_XX	Unassigned Pyramimonadales_XX (Family)	Unassigned Pyramimonadales_XX (Family)	0.00875722	Pos	Protist-Protist
ASV8126	Eukaryota	Spirotrichea	Choreotrichida	Strobilidiidae_I	Pelagostrobilidium	Pelagostrobilidium_sp.	ASV4339	Eukaryota	MAST-12	MAST-12A	MAST-12A_X	MAST-12A_XX	MAST-12A_XX_sp.	0.129424	Pos	Protist-Protist
ASV8126	Eukaryota	Spirotrichea	Choreotrichida	Strobilidiidae_I	Pelagostrobilidium	Pelagostrobilidium_sp.	ASV2932	Eukaryota	Bacillariophyta	Bacillariophyta_X	Polar-centric-Mediophyceae	Skeletonema	Unassigned Skeletonema (Genus)	0.101877	Pos	Protist-Protist
ASV8126	Eukaryota	Spirotrichea	Choreotrichida	Strobilidiidae_I	Pelagostrobilidium	Pelagostrobilidium_sp.	ASV7814	Eukaryota	Spirotrichea	Strombidiida	Strombidiidae	Spirostrombidium	Spirostrombidium_agathae	-0.181516	Neg	Protist-Protist
ASV8126	Eukaryota	Spirotrichea	Choreotrichida	Strobilidiidae_I	Pelagostrobilidium	Pelagostrobilidium_sp.	ASV7722	Eukaryota	Spirotrichea	Strombidiida	Strombidiidae_K	Strombidium_K	Strombidium_capitatum	0.149139	Pos	Protist-Protist
ASV8126	Eukaryota	Spirotrichea	Choreotrichida	Strobilidiidae_I	Pelagostrobilidium	Pelagostrobilidium_sp.	ASV2881	Eukaryota	Bacillariophyta	Bacillariophyta_X	Polar-centric-Mediophyceae	Thalassiosira	Unassigned Thalassiosira (Genus)	0.05001	Pos	Protist-Protist
ASV8126	Eukaryota	Spirotrichea	Choreotrichida	Strobilidiidae_I	Pelagostrobilidium	Pelagostrobilidium_sp.	ASV7787	Eukaryota	Spirotrichea	Strombidiida	Strombidiidae	Strombidium	Strombidium_sp.	-0.215407	Neg	Protist-Protist
ASV8126	Eukaryota	Spirotrichea	Choreotrichida	Strobilidiidae_I	Pelagostrobilidium	Pelagostrobilidium_sp.	ASV2860	Eukaryota	Bacillariophyta	Bacillariophyta_X	Polar-centric-Mediophyceae	Thalassiosira	Thalassiosira_mala	-0.00289395	Neg	Protist-Protist
ASV8126	Eukaryota	Spirotrichea	Choreotrichida	Strobilidiidae_I	Pelagostrobilidium	Pelagostrobilidium_sp.	ASV7793	Eukaryota	Spirotrichea	Strombidiida_B	Strombidiida_B_X	Strombidiida_B_XX	Strombidiida_B_XX_sp.	0.190693	Pos	Protist-Protist
ASV8126	Eukaryota	Spirotrichea	Choreotrichida	Strobilidiidae_I	Pelagostrobilidium	Pelagostrobilidium_sp.	ASV2520	Eukaryota	Bacillariophyta	Bacillariophyta_X	Polar-centric-Mediophyceae	Chaetoceros	Chaetoceros_pumilum	-0.00708039	Neg	Protist-Protist
ASV8128	Eukaryota	Spirotrichea	Choreotrichida	Strobilidiidae_I	Pelagostrobilidium	Pelagostrobilidium_sp.	ASV864	Eukaryota	Filosa-Thecofilosea	Cryomonadida	Protaspa-lineage	Protaspa-lineage_X	Protaspa-lineage_X_sp.	0.559187	Pos	Protist-Protist
ASV8144	Eukaryota	Spirotrichea	Choreotrichida	Strobilidiidae	Strobilidiidae_X	Strobilidiidae_X_sp.	ASV6926	Eukaryota	Pyramimonadales	Pyramimonadales_X	Pyramimonadales_XX	Unassigned Pyramimonadales_XX (Family)	Unassigned Pyramimonadales_XX (Family)	-0.0397833	Neg	Protist-Protist
ASV8144	Eukaryota	Spirotrichea	Choreotrichida	Strobilidiidae	Strobilidiidae_X	Strobilidiidae_X_sp.	ASV7811	Eukaryota	Spirotrichea	Strombidiida	Strombidiidae	Unassigned Strombidiidae (Family)	Unassigned Strombidiidae (Family)	0.189428	Pos	Protist-Protist
ASV8144	Eukaryota	Spirotrichea	Choreotrichida	Strobilidiidae	Strobilidiidae_X	Strobilidiidae_X_sp.	ASV8116	Eukaryota	Spirotrichea	Choreotrichida	Strobilidiidae_I	Pelagostrobilidium	Pelagostrobilidium_neptuni	0.0320576	Pos	Protist-Protist
ASV8144	Eukaryota	Spirotrichea	Choreotrichida	Strobilidiidae	Strobilidiidae_X	Strobilidiidae_X_sp.	ASV8048	Eukaryota	Spirotrichea	Tintinnida	Tintinnidiidae	Tintinnidium	Unassigned Tintinnidium (Genus)	0.241453	Pos	Protist-Protist
ASV8150	Eukaryota	Spirotrichea	Unassigned Spirotrichea (Class)	Unassigned Spirotrichea (Class)	Unassigned Spirotrichea (Class)	Unassigned Spirotrichea (Class)	ASV3540	Eukaryota	MAST-6	MAST-6_X	MAST-6_XX	MAST-6_XXX	MAST-6_XXX_sp.	0.0965946	Pos	Protist-Protist
ASV8150	Eukaryota	Spirotrichea	Unassigned Spirotrichea (Class)	Unassigned Spirotrichea (Class)	Unassigned Spirotrichea (Class)	Unassigned Spirotrichea (Class)	ASV7811	Eukaryota	Spirotrichea	Strombidiida	Strombidiidae	Unassigned Strombidiidae (Family)	Unassigned Strombidiidae (Family)	0.138825	Pos	Protist-Protist
ASV8150	Eukaryota	Spirotrichea	Unassigned Spirotrichea (Class)	Unassigned Spirotrichea (Class)	Unassigned Spirotrichea (Class)	Unassigned Spirotrichea (Class)	ASV842	Eukaryota	Filosa-Thecofilosea	Cryomonadida	Protaspa-lineage	Protaspa-lineage_X	Protaspa-lineage_X_sp.	-0.0503142	Neg	Protist-Protist
ASV8150	Eukaryota	Spirotrichea	Unassigned Spirotrichea (Class)	Unassigned Spirotrichea (Class)	Unassigned Spirotrichea (Class)	Unassigned Spirotrichea (Class)	ASV8116	Eukaryota	Spirotrichea	Choreotrichida	Strobilidiidae_I	Pelagostrobilidium	Pelagostrobilidium_neptuni	0.0360015	Pos	Protist-Protist
ASV8150	Eukaryota	Spirotrichea	Unassigned Spirotrichea (Class)	Unassigned Spirotrichea (Class)	Unassigned Spirotrichea (Class)	Unassigned Spirotrichea (Class)	ASV8144	Eukaryota	Spirotrichea	Choreotrichida	Strobilidiidae	Strobilidiidae_X	Strobilidiidae_X_sp.	0.223233	Pos	Protist-Protist
ASV8175	Eukaryota	Spirotrichea	Choreotrichida	Strobilidiidae_I	Pelagostrobilidium	Pelagostrobilidium_paraepacrum	ASV8065	Eukaryota	Spirotrichea	Choreotrichida	Strombidinopsidae	Strombidinopsis	Strombidinopsis_sp.	0.265389	Pos	Protist-Protist
ASV8175	Eukaryota	Spirotrichea	Choreotrichida	Strobilidiidae_I	Pelagostrobilidium	Pelagostrobilidium_paraepacrum	ASV2562	Eukaryota	Bacillariophyta	Bacillariophyta_X	Polar-centric-Mediophyceae	Chaetoceros	Chaetoceros_elegans	-0.138361	Neg	Protist-Protist
ASV8175	Eukaryota	Spirotrichea	Choreotrichida	Strobilidiidae_I	Pelagostrobilidium	Pelagostrobilidium_paraepacrum	ASV8144	Eukaryota	Spirotrichea	Choreotrichida	Strobilidiidae	Strobilidiidae_X	Strobilidiidae_X_sp.	0.0306101	Pos	Protist-Protist
ASV8175	Eukaryota	Spirotrichea	Choreotrichida	Strobilidiidae_I	Pelagostrobilidium	Pelagostrobilidium_paraepacrum	ASV7770	Eukaryota	Spirotrichea	Strombidiida	Strombidiidae_M	Strombidium_M	Strombidium_M_sp.	-0.0035295	Neg	Protist-Protist
ASV8206	Eukaryota	Filosa-Imbricatea	Filosa-Imbricatea_X	Novel-clade-2	Novel-clade-2_X	Novel-clade-2_X_sp.	ASV7004	Eukaryota	Mamiellophyceae	Mamiellales	Bathycoccaceae	Ostreococcus	Ostreococcus_mediterraneus	0.0684413	Pos	Protist-Protist
ASV8206	Eukaryota	Filosa-Imbricatea	Filosa-Imbricatea_X	Novel-clade-2	Novel-clade-2_X	Novel-clade-2_X_sp.	ASV2880	Eukaryota	Bacillariophyta	Bacillariophyta_X	Polar-centric-Mediophyceae	Thalassiosira	Unassigned Thalassiosira (Genus)	-0.00425163	Neg	Protist-Protist
ASV8206	Eukaryota	Filosa-Imbricatea	Filosa-Imbricatea_X	Novel-clade-2	Novel-clade-2_X	Novel-clade-2_X_sp.	ASV6993	Eukaryota	Mamiellophyceae	Mamiellales	Mamiellaceae	Micromonas	Micromonas_bravo_B1	0.414632	Pos	Protist-Protist
ASV8262	Eukaryota	Colpodellidea	Colpodellida	Chrompodellids_CHR1_XX	Chrompodellids_CHR1_XXX	Chrompodellids_CHR1_XXX_sp.	ASV8175	Eukaryota	Spirotrichea	Choreotrichida	Strobilidiidae_I	Pelagostrobilidium	Pelagostrobilidium_paraepacrum	-0.100333	Neg	Protist-Protist
ASV8262	Eukaryota	Colpodellidea	Colpodellida	Chrompodellids_CHR1_XX	Chrompodellids_CHR1_XXX	Chrompodellids_CHR1_XXX_sp.	ASV8206	Eukaryota	Filosa-Imbricatea	Filosa-Imbricatea_X	Novel-clade-2	Novel-clade-2_X	Novel-clade-2_X_sp.	0.0172778	Pos	Protist-Protist
ASV8262	Eukaryota	Colpodellidea	Colpodellida	Chrompodellids_CHR1_XX	Chrompodellids_CHR1_XXX	Chrompodellids_CHR1_XXX_sp.	ASV2869	Eukaryota	Bacillariophyta	Bacillariophyta_X	Polar-centric-Mediophyceae	Unassigned Polar-centric-Mediophyceae (Family)	Unassigned Polar-centric-Mediophyceae (Family)	-0.115716	Neg	Protist-Protist
ASV8262	Eukaryota	Colpodellidea	Colpodellida	Chrompodellids_CHR1_XX	Chrompodellids_CHR1_XXX	Chrompodellids_CHR1_XXX_sp.	ASV7770	Eukaryota	Spirotrichea	Strombidiida	Strombidiidae_M	Strombidium_M	Strombidium_M_sp.	0.0140982	Pos	Protist-Protist
ASV8262	Eukaryota	Colpodellidea	Colpodellida	Chrompodellids_CHR1_XX	Chrompodellids_CHR1_XXX	Chrompodellids_CHR1_XXX_sp.	ASV7028	Eukaryota	Mamiellophyceae	Mamiellales	Bathycoccaceae	Ostreococcus	Unassigned Ostreococcus (Genus)	0.168448	Pos	Protist-Protist
ASV8262	Eukaryota	Colpodellidea	Colpodellida	Chrompodellids_CHR1_XX	Chrompodellids_CHR1_XXX	Chrompodellids_CHR1_XXX_sp.	ASV7005	Eukaryota	Mamiellophyceae	Mamiellales	Bathycoccaceae	Ostreococcus	Ostreococcus_mediterraneus	0.0450045	Pos	Protist-Protist
ASV8262	Eukaryota	Colpodellidea	Colpodellida	Chrompodellids_CHR1_XX	Chrompodellids_CHR1_XXX	Chrompodellids_CHR1_XXX_sp.	ASV8144	Eukaryota	Spirotrichea	Choreotrichida	Strobilidiidae	Strobilidiidae_X	Strobilidiidae_X_sp.	-0.046264	Neg	Protist-Protist
ASV8262	Eukaryota	Colpodellidea	Colpodellida	Chrompodellids_CHR1_XX	Chrompodellids_CHR1_XXX	Chrompodellids_CHR1_XXX_sp.	ASV8128	Eukaryota	Spirotrichea	Choreotrichida	Strobilidiidae_I	Pelagostrobilidium	Pelagostrobilidium_sp.	0.156122	Pos	Protist-Protist
ASV8262	Eukaryota	Colpodellidea	Colpodellida	Chrompodellids_CHR1_XX	Chrompodellids_CHR1_XXX	Chrompodellids_CHR1_XXX_sp.	ASV6993	Eukaryota	Mamiellophyceae	Mamiellales	Mamiellaceae	Micromonas	Micromonas_bravo_B1	0.154325	Pos	Protist-Protist
ASV8262	Eukaryota	Colpodellidea	Colpodellida	Chrompodellids_CHR1_XX	Chrompodellids_CHR1_XXX	Chrompodellids_CHR1_XXX_sp.	ASV2468	Eukaryota	Bacillariophyta	Bacillariophyta_X	Polar-centric-Mediophyceae	Chaetoceros	Chaetoceros_danicus	-0.216523	Neg	Protist-Protist
ASV8262	Eukaryota	Colpodellidea	Colpodellida	Chrompodellids_CHR1_XX	Chrompodellids_CHR1_XXX	Chrompodellids_CHR1_XXX_sp.	ASV8048	Eukaryota	Spirotrichea	Tintinnida	Tintinnidiidae	Tintinnidium	Unassigned Tintinnidium (Genus)	-0.0547108	Neg	Protist-Protist
ASV8364	Eukaryota	Syndiniales	Dino-Group-I	Dino-Group-I-Clade-1	Dino-Group-I-Clade-1_X	Dino-Group-I-Clade-1_X_sp.	ASV2734	Eukaryota	Bacillariophyta	Bacillariophyta_X	Radial-centric-basal-Coscinodiscophyceae	Guinardia	Guinardia_delicatula	0.2659	Pos	Protist-Protist
ASV8364	Eukaryota	Syndiniales	Dino-Group-I	Dino-Group-I-Clade-1	Dino-Group-I-Clade-1_X	Dino-Group-I-Clade-1_X_sp.	ASV2849	Eukaryota	Bacillariophyta	Bacillariophyta_X	Polar-centric-Mediophyceae	Thalassiosira	Unassigned Thalassiosira (Genus)	-0.0421752	Neg	Protist-Protist
ASV8364	Eukaryota	Syndiniales	Dino-Group-I	Dino-Group-I-Clade-1	Dino-Group-I-Clade-1_X	Dino-Group-I-Clade-1_X_sp.	ASV6274	Eukaryota	Telonemia_X	Telonemia_XX	Telonemia-Group-1	Telonemia-Group-1_X	Telonemia-Group-1_X_sp.	0.0114411	Pos	Protist-Protist
ASV8364	Eukaryota	Syndiniales	Dino-Group-I	Dino-Group-I-Clade-1	Dino-Group-I-Clade-1_X	Dino-Group-I-Clade-1_X_sp.	ASV4819	Eukaryota	Prymnesiophyceae	Prymnesiales	Chrysochromulinaceae	Chrysochromulina	Chrysochromulina_sp.	0.0852165	Pos	Protist-Protist
ASV8512	Eukaryota	Syndiniales	Dino-Group-II	Dino-Group-II-Clade-1	Dino-Group-II-Clade-1_X	Dino-Group-II-Clade-1_X_sp.	ASV3507	Eukaryota	MAST-1	MAST-1C	MAST-1C_X	MAST-1C_XX	MAST-1C_XX_sp.	-0.0907492	Neg	Protist-Protist
ASV8512	Eukaryota	Syndiniales	Dino-Group-II	Dino-Group-II-Clade-1	Dino-Group-II-Clade-1_X	Dino-Group-II-Clade-1_X_sp.	ASV2778	Eukaryota	Bacillariophyta	Bacillariophyta_X	Polar-centric-Mediophyceae	Cyclotella	Cyclotella_sp.	-0.00542553	Neg	Protist-Protist
ASV8544	Eukaryota	Syndiniales	Dino-Group-II	Dino-Group-II-Clade-1	Dino-Group-II-Clade-1_X	Dino-Group-II-Clade-1_X_sp.	ASV2860	Eukaryota	Bacillariophyta	Bacillariophyta_X	Polar-centric-Mediophyceae	Thalassiosira	Thalassiosira_mala	0.114774	Pos	Protist-Protist
ASV8544	Eukaryota	Syndiniales	Dino-Group-II	Dino-Group-II-Clade-1	Dino-Group-II-Clade-1_X	Dino-Group-II-Clade-1_X_sp.	ASV7678	Eukaryota	Spirotrichea	Strombidiida	Strombidiidae_R	Strombidium_R	Strombidium_R_sp.	-0.06021	Neg	Protist-Protist
ASV8544	Eukaryota	Syndiniales	Dino-Group-II	Dino-Group-II-Clade-1	Dino-Group-II-Clade-1_X	Dino-Group-II-Clade-1_X_sp.	ASV840	Eukaryota	Filosa-Thecofilosea	Cryomonadida	Protaspa-lineage	Protaspa-lineage_X	Protaspa-lineage_X_sp.	0.050192	Pos	Protist-Protist
ASV8799	Eukaryota	Syndiniales	Dino-Group-II	Unassigned Dino-Group-II (Order)	Unassigned Dino-Group-II (Order)	Unassigned Dino-Group-II (Order)	ASV7676	Eukaryota	Spirotrichea	Strombidiida	Strombidiidae_R	Strombidium_R	Strombidium_R_sp.	0.0306152	Pos	Protist-Protist
ASV8799	Eukaryota	Syndiniales	Dino-Group-II	Unassigned Dino-Group-II (Order)	Unassigned Dino-Group-II (Order)	Unassigned Dino-Group-II (Order)	ASV1027	Eukaryota	Filosa-Thecofilosea	Ebriida	TAGIRI1-lineage	TAGIRI1-lineage_X	TAGIRI1-lineage_X_sp.	0.347436	Pos	Protist-Protist
ASV8962	Eukaryota	Syndiniales	Dino-Group-II	Dino-Group-II-Clade-6	Dino-Group-II-Clade-6_X	Dino-Group-II-Clade-6_X_sp.	ASV8116	Eukaryota	Spirotrichea	Choreotrichida	Strobilidiidae_I	Pelagostrobilidium	Pelagostrobilidium_neptuni	0.0718385	Pos	Protist-Protist
ASV8962	Eukaryota	Syndiniales	Dino-Group-II	Dino-Group-II-Clade-6	Dino-Group-II-Clade-6_X	Dino-Group-II-Clade-6_X_sp.	ASV63	Eukaryota	Bacillariophyta	Bacillariophyta_X	Radial-centric-basal-Coscinodiscophyceae	Corethron	Corethron_hystrix	0.357909	Pos	Protist-Protist
ASV8962	Eukaryota	Syndiniales	Dino-Group-II	Dino-Group-II-Clade-6	Dino-Group-II-Clade-6_X	Dino-Group-II-Clade-6_X_sp.	ASV2772	Eukaryota	Bacillariophyta	Bacillariophyta_X	Polar-centric-Mediophyceae	Cyclotella	Unassigned Cyclotella (Genus)	-0.126045	Neg	Protist-Protist
ASV8962	Eukaryota	Syndiniales	Dino-Group-II	Dino-Group-II-Clade-6	Dino-Group-II-Clade-6_X	Dino-Group-II-Clade-6_X_sp.	ASV2823	Eukaryota	Bacillariophyta	Bacillariophyta_X	Polar-centric-Mediophyceae	Thalassiosira	Unassigned Thalassiosira (Genus)	-0.0241274	Neg	Protist-Protist
ASV8962	Eukaryota	Syndiniales	Dino-Group-II	Dino-Group-II-Clade-6	Dino-Group-II-Clade-6_X	Dino-Group-II-Clade-6_X_sp.	ASV8512	Eukaryota	Syndiniales	Dino-Group-II	Dino-Group-II-Clade-1	Dino-Group-II-Clade-1_X	Dino-Group-II-Clade-1_X_sp.	0.010862	Pos	Protist-Protist
ASV8965	Eukaryota	Syndiniales	Dino-Group-II	Dino-Group-II-Clade-6	Dino-Group-II-Clade-6_X	Dino-Group-II-Clade-6_X_sp.	ASV8512	Eukaryota	Syndiniales	Dino-Group-II	Dino-Group-II-Clade-1	Dino-Group-II-Clade-1_X	Dino-Group-II-Clade-1_X_sp.	0.145066	Pos	Protist-Protist
ASV8965	Eukaryota	Syndiniales	Dino-Group-II	Dino-Group-II-Clade-6	Dino-Group-II-Clade-6_X	Dino-Group-II-Clade-6_X_sp.	ASV8544	Eukaryota	Syndiniales	Dino-Group-II	Dino-Group-II-Clade-1	Dino-Group-II-Clade-1_X	Dino-Group-II-Clade-1_X_sp.	-0.333732	Neg	Protist-Protist
ASV8965	Eukaryota	Syndiniales	Dino-Group-II	Dino-Group-II-Clade-6	Dino-Group-II-Clade-6_X	Dino-Group-II-Clade-6_X_sp.	ASV7793	Eukaryota	Spirotrichea	Strombidiida_B	Strombidiida_B_X	Strombidiida_B_XX	Strombidiida_B_XX_sp.	0.137821	Pos	Protist-Protist
ASV9094	Eukaryota	Syndiniales	Dino-Group-I	Dino-Group-I-Clade-4	Dino-Group-I-Clade-4_X	Dino-Group-I-Clade-4_X_sp.	ASV6486	Eukaryota	Cryptophyceae	Cryptomonadales	Cryptomonadales_X	Falcomonas	Falcomonas_daucoides	0.0207321	Pos	Protist-Protist
ASV9094	Eukaryota	Syndiniales	Dino-Group-I	Dino-Group-I-Clade-4	Dino-Group-I-Clade-4_X	Dino-Group-I-Clade-4_X_sp.	ASV6993	Eukaryota	Mamiellophyceae	Mamiellales	Mamiellaceae	Micromonas	Micromonas_bravo_B1	0.0280997	Pos	Protist-Protist
ASV9094	Eukaryota	Syndiniales	Dino-Group-I	Dino-Group-I-Clade-4	Dino-Group-I-Clade-4_X	Dino-Group-I-Clade-4_X_sp.	ASV7181	Eukaryota	Unassigned Fungi (Division)	Unassigned Fungi (Division)	Unassigned Fungi (Division)	Unassigned Fungi (Division)	Unassigned Fungi (Division)	0.095973	Pos	Protist-Protist
ASV9095	Eukaryota	Syndiniales	Dino-Group-I	Dino-Group-I-Clade-4	Dino-Group-I-Clade-4_X	Dino-Group-I-Clade-4_X_sp.	ASV9094	Eukaryota	Syndiniales	Dino-Group-I	Dino-Group-I-Clade-4	Dino-Group-I-Clade-4_X	Dino-Group-I-Clade-4_X_sp.	0.332678	Pos	Protist-Protist
ASV9095	Eukaryota	Syndiniales	Dino-Group-I	Dino-Group-I-Clade-4	Dino-Group-I-Clade-4_X	Dino-Group-I-Clade-4_X_sp.	ASV2519	Eukaryota	Bacillariophyta	Bacillariophyta_X	Polar-centric-Mediophyceae	Chaetoceros	Unassigned Chaetoceros (Genus)	0.0806997	Pos	Protist-Protist
ASV9095	Eukaryota	Syndiniales	Dino-Group-I	Dino-Group-I-Clade-4	Dino-Group-I-Clade-4_X	Dino-Group-I-Clade-4_X_sp.	ASV8128	Eukaryota	Spirotrichea	Choreotrichida	Strobilidiidae_I	Pelagostrobilidium	Pelagostrobilidium_sp.	0.0105421	Pos	Protist-Protist
ASV9095	Eukaryota	Syndiniales	Dino-Group-I	Dino-Group-I-Clade-4	Dino-Group-I-Clade-4_X	Dino-Group-I-Clade-4_X_sp.	ASV7676	Eukaryota	Spirotrichea	Strombidiida	Strombidiidae_R	Strombidium_R	Strombidium_R_sp.	-0.0823096	Neg	Protist-Protist
ASV9160	Eukaryota	Dinophyceae	Gonyaulacales	Goniodomataceae	Alexandrium	Unassigned Alexandrium (Genus)	ASV7004	Eukaryota	Mamiellophyceae	Mamiellales	Bathycoccaceae	Ostreococcus	Ostreococcus_mediterraneus	-0.0709925	Neg	Protist-Protist
ASV9160	Eukaryota	Dinophyceae	Gonyaulacales	Goniodomataceae	Alexandrium	Unassigned Alexandrium (Genus)	ASV6910	Eukaryota	Pyramimonadales	Pyramimonadales_X	Pyramimonadales_XX	Unassigned Pyramimonadales_XX (Family)	Unassigned Pyramimonadales_XX (Family)	-0.0306169	Neg	Protist-Protist
ASV9160	Eukaryota	Dinophyceae	Gonyaulacales	Goniodomataceae	Alexandrium	Unassigned Alexandrium (Genus)	ASV2562	Eukaryota	Bacillariophyta	Bacillariophyta_X	Polar-centric-Mediophyceae	Chaetoceros	Chaetoceros_elegans	-0.093593	Neg	Protist-Protist
ASV9160	Eukaryota	Dinophyceae	Gonyaulacales	Goniodomataceae	Alexandrium	Unassigned Alexandrium (Genus)	ASV7005	Eukaryota	Mamiellophyceae	Mamiellales	Bathycoccaceae	Ostreococcus	Ostreococcus_mediterraneus	-0.0639716	Neg	Protist-Protist
ASV9160	Eukaryota	Dinophyceae	Gonyaulacales	Goniodomataceae	Alexandrium	Unassigned Alexandrium (Genus)	ASV2858	Eukaryota	Bacillariophyta	Bacillariophyta_X	Polar-centric-Mediophyceae	Unassigned Polar-centric-Mediophyceae (Family)	Unassigned Polar-centric-Mediophyceae (Family)	0.273196	Pos	Protist-Protist
ASV9400	Eukaryota	Syndiniales	Dino-Group-III	Dino-Group-III_X	Dino-Group-III_XX	Dino-Group-III_XX_sp.	ASV2772	Eukaryota	Bacillariophyta	Bacillariophyta_X	Polar-centric-Mediophyceae	Cyclotella	Unassigned Cyclotella (Genus)	0.135657	Pos	Protist-Protist
ASV9400	Eukaryota	Syndiniales	Dino-Group-III	Dino-Group-III_X	Dino-Group-III_XX	Dino-Group-III_XX_sp.	ASV6926	Eukaryota	Pyramimonadales	Pyramimonadales_X	Pyramimonadales_XX	Unassigned Pyramimonadales_XX (Family)	Unassigned Pyramimonadales_XX (Family)	0.0370651	Pos	Protist-Protist
ASV9400	Eukaryota	Syndiniales	Dino-Group-III	Dino-Group-III_X	Dino-Group-III_XX	Dino-Group-III_XX_sp.	ASV2860	Eukaryota	Bacillariophyta	Bacillariophyta_X	Polar-centric-Mediophyceae	Thalassiosira	Thalassiosira_mala	-0.140454	Neg	Protist-Protist
ASV9400	Eukaryota	Syndiniales	Dino-Group-III	Dino-Group-III_X	Dino-Group-III_XX	Dino-Group-III_XX_sp.	ASV2888	Eukaryota	Bacillariophyta	Bacillariophyta_X	Polar-centric-Mediophyceae	Thalassiosira	Unassigned Thalassiosira (Genus)	0.124511	Pos	Protist-Protist
ASV9400	Eukaryota	Syndiniales	Dino-Group-III	Dino-Group-III_X	Dino-Group-III_XX	Dino-Group-III_XX_sp.	ASV4819	Eukaryota	Prymnesiophyceae	Prymnesiales	Chrysochromulinaceae	Chrysochromulina	Chrysochromulina_sp.	0.0447893	Pos	Protist-Protist
ASV9400	Eukaryota	Syndiniales	Dino-Group-III	Dino-Group-III_X	Dino-Group-III_XX	Dino-Group-III_XX_sp.	ASV7596	Eukaryota	CONThreeP	CONThreeP_X	CONThreeP_XX	Askenasia	Askenasia_sp.	-0.0405762	Neg	Protist-Protist
ASV9400	Eukaryota	Syndiniales	Dino-Group-III	Dino-Group-III_X	Dino-Group-III_XX	Dino-Group-III_XX_sp.	ASV3540	Eukaryota	MAST-6	MAST-6_X	MAST-6_XX	MAST-6_XXX	MAST-6_XXX_sp.	-0.0750752	Neg	Protist-Protist
ASV9400	Eukaryota	Syndiniales	Dino-Group-III	Dino-Group-III_X	Dino-Group-III_XX	Dino-Group-III_XX_sp.	ASV7805	Eukaryota	Spirotrichea	Strombidiida	Strombidiidae	Unassigned Strombidiidae (Family)	Unassigned Strombidiidae (Family)	0.100892	Pos	Protist-Protist
ASV9400	Eukaryota	Syndiniales	Dino-Group-III	Dino-Group-III_X	Dino-Group-III_XX	Dino-Group-III_XX_sp.	ASV8150	Eukaryota	Spirotrichea	Unassigned Spirotrichea (Class)	Unassigned Spirotrichea (Class)	Unassigned Spirotrichea (Class)	Unassigned Spirotrichea (Class)	-0.108764	Neg	Protist-Protist
ASV9427	Eukaryota	Dinophyceae	Gymnodiniales	Gymnodiniaceae	Gyrodinium	Gyrodinium_dominans	ASV7678	Eukaryota	Spirotrichea	Strombidiida	Strombidiidae_R	Strombidium_R	Strombidium_R_sp.	-0.136545	Neg	Protist-Protist
ASV9427	Eukaryota	Dinophyceae	Gymnodiniales	Gymnodiniaceae	Gyrodinium	Gyrodinium_dominans	ASV7181	Eukaryota	Unassigned Fungi (Division)	Unassigned Fungi (Division)	Unassigned Fungi (Division)	Unassigned Fungi (Division)	Unassigned Fungi (Division)	0.273907	Pos	Protist-Protist
ASV9427	Eukaryota	Dinophyceae	Gymnodiniales	Gymnodiniaceae	Gyrodinium	Gyrodinium_dominans	ASV840	Eukaryota	Filosa-Thecofilosea	Cryomonadida	Protaspa-lineage	Protaspa-lineage_X	Protaspa-lineage_X_sp.	0.000808225	Pos	Protist-Protist
ASV9427	Eukaryota	Dinophyceae	Gymnodiniales	Gymnodiniaceae	Gyrodinium	Gyrodinium_dominans	ASV9094	Eukaryota	Syndiniales	Dino-Group-I	Dino-Group-I-Clade-4	Dino-Group-I-Clade-4_X	Dino-Group-I-Clade-4_X_sp.	0.0406545	Pos	Protist-Protist
ASV9427	Eukaryota	Dinophyceae	Gymnodiniales	Gymnodiniaceae	Gyrodinium	Gyrodinium_dominans	ASV6452	Eukaryota	Cryptophyceae	Cryptomonadales	Cryptomonadales_X	Cryptomonadales_XX	Cryptomonadales_XX_sp.	0.0272879	Pos	Protist-Protist
ASV9427	Eukaryota	Dinophyceae	Gymnodiniales	Gymnodiniaceae	Gyrodinium	Gyrodinium_dominans	ASV4816	Eukaryota	Prymnesiophyceae	Prymnesiales	Chrysochromulinaceae	Chrysochromulina	Chrysochromulina_sp.	-0.165379	Neg	Protist-Protist
ASV9486	Eukaryota	Dinophyceae	Gymnodiniales	Gymnodiniaceae	Gymnodinium	Gymnodinium_sp.	ASV8544	Eukaryota	Syndiniales	Dino-Group-II	Dino-Group-II-Clade-1	Dino-Group-II-Clade-1_X	Dino-Group-II-Clade-1_X_sp.	0.45718	Pos	Protist-Protist
ASV9486	Eukaryota	Dinophyceae	Gymnodiniales	Gymnodiniaceae	Gymnodinium	Gymnodinium_sp.	ASV8150	Eukaryota	Spirotrichea	Unassigned Spirotrichea (Class)	Unassigned Spirotrichea (Class)	Unassigned Spirotrichea (Class)	Unassigned Spirotrichea (Class)	0.15988	Pos	Protist-Protist
ASV9486	Eukaryota	Dinophyceae	Gymnodiniales	Gymnodiniaceae	Gymnodinium	Gymnodinium_sp.	ASV9400	Eukaryota	Syndiniales	Dino-Group-III	Dino-Group-III_X	Dino-Group-III_XX	Dino-Group-III_XX_sp.	-0.106655	Neg	Protist-Protist
ASV9507	Eukaryota	Dinophyceae	Unassigned Dinophyceae (Class)	Unassigned Dinophyceae (Class)	Unassigned Dinophyceae (Class)	Unassigned Dinophyceae (Class)	ASV2904	Eukaryota	Bacillariophyta	Bacillariophyta_X	Polar-centric-Mediophyceae	Skeletonema	Skeletonema_sp.	-0.331527	Neg	Protist-Protist
ASV9507	Eukaryota	Dinophyceae	Unassigned Dinophyceae (Class)	Unassigned Dinophyceae (Class)	Unassigned Dinophyceae (Class)	Unassigned Dinophyceae (Class)	ASV2700	Eukaryota	Bacillariophyta	Bacillariophyta_X	Radial-centric-basal-Coscinodiscophyceae	Actinocyclus	Actinocyclus_curvatulus	-0.10271	Neg	Protist-Protist
ASV9507	Eukaryota	Dinophyceae	Unassigned Dinophyceae (Class)	Unassigned Dinophyceae (Class)	Unassigned Dinophyceae (Class)	Unassigned Dinophyceae (Class)	ASV2860	Eukaryota	Bacillariophyta	Bacillariophyta_X	Polar-centric-Mediophyceae	Thalassiosira	Thalassiosira_mala	0.0596333	Pos	Protist-Protist
ASV9507	Eukaryota	Dinophyceae	Unassigned Dinophyceae (Class)	Unassigned Dinophyceae (Class)	Unassigned Dinophyceae (Class)	Unassigned Dinophyceae (Class)	ASV2637	Eukaryota	Bacillariophyta	Bacillariophyta_X	Polar-centric-Mediophyceae	Unassigned Polar-centric-Mediophyceae (Family)	Unassigned Polar-centric-Mediophyceae (Family)	-0.0126016	Neg	Protist-Protist
ASV9508	Eukaryota	Dinophyceae	Unassigned Dinophyceae (Class)	Unassigned Dinophyceae (Class)	Unassigned Dinophyceae (Class)	Unassigned Dinophyceae (Class)	ASV8206	Eukaryota	Filosa-Imbricatea	Filosa-Imbricatea_X	Novel-clade-2	Novel-clade-2_X	Novel-clade-2_X_sp.	-0.127715	Neg	Protist-Protist
ASV9508	Eukaryota	Dinophyceae	Unassigned Dinophyceae (Class)	Unassigned Dinophyceae (Class)	Unassigned Dinophyceae (Class)	Unassigned Dinophyceae (Class)	ASV9094	Eukaryota	Syndiniales	Dino-Group-I	Dino-Group-I-Clade-4	Dino-Group-I-Clade-4_X	Dino-Group-I-Clade-4_X_sp.	-0.192871	Neg	Protist-Protist
ASV9508	Eukaryota	Dinophyceae	Unassigned Dinophyceae (Class)	Unassigned Dinophyceae (Class)	Unassigned Dinophyceae (Class)	Unassigned Dinophyceae (Class)	ASV840	Eukaryota	Filosa-Thecofilosea	Cryomonadida	Protaspa-lineage	Protaspa-lineage_X	Protaspa-lineage_X_sp.	-0.0272651	Neg	Protist-Protist
ASV9512	Eukaryota	Dinophyceae	Unassigned Dinophyceae (Class)	Unassigned Dinophyceae (Class)	Unassigned Dinophyceae (Class)	Unassigned Dinophyceae (Class)	ASV7028	Eukaryota	Mamiellophyceae	Mamiellales	Bathycoccaceae	Ostreococcus	Unassigned Ostreococcus (Genus)	0.398624	Pos	Protist-Protist
ASV9512	Eukaryota	Dinophyceae	Unassigned Dinophyceae (Class)	Unassigned Dinophyceae (Class)	Unassigned Dinophyceae (Class)	Unassigned Dinophyceae (Class)	ASV6398	Eukaryota	Katablepharidaceae	Katablepharidales	Katablepharidales_X	Leucocryptos	Leucocryptos_marina	0.0989382	Pos	Protist-Protist
ASV9512	Eukaryota	Dinophyceae	Unassigned Dinophyceae (Class)	Unassigned Dinophyceae (Class)	Unassigned Dinophyceae (Class)	Unassigned Dinophyceae (Class)	ASV8116	Eukaryota	Spirotrichea	Choreotrichida	Strobilidiidae_I	Pelagostrobilidium	Pelagostrobilidium_neptuni	0.277506	Pos	Protist-Protist
ASV9512	Eukaryota	Dinophyceae	Unassigned Dinophyceae (Class)	Unassigned Dinophyceae (Class)	Unassigned Dinophyceae (Class)	Unassigned Dinophyceae (Class)	ASV6518	Eukaryota	Cryptophyceae	Cryptomonadales	Cryptomonadales_X	Teleaulax	Unassigned Teleaulax (Genus)	-0.213256	Neg	Protist-Protist
ASV9531	Eukaryota	Dinophyceae	Gymnodiniales	Gymnodiniaceae	Unassigned Gymnodiniaceae (Family)	Unassigned Gymnodiniaceae (Family)	ASV8965	Eukaryota	Syndiniales	Dino-Group-II	Dino-Group-II-Clade-6	Dino-Group-II-Clade-6_X	Dino-Group-II-Clade-6_X_sp.	0.16798	Pos	Protist-Protist
ASV9531	Eukaryota	Dinophyceae	Gymnodiniales	Gymnodiniaceae	Unassigned Gymnodiniaceae (Family)	Unassigned Gymnodiniaceae (Family)	ASV7793	Eukaryota	Spirotrichea	Strombidiida_B	Strombidiida_B_X	Strombidiida_B_XX	Strombidiida_B_XX_sp.	0.0852984	Pos	Protist-Protist
ASV9531	Eukaryota	Dinophyceae	Gymnodiniales	Gymnodiniaceae	Unassigned Gymnodiniaceae (Family)	Unassigned Gymnodiniaceae (Family)	ASV8544	Eukaryota	Syndiniales	Dino-Group-II	Dino-Group-II-Clade-1	Dino-Group-II-Clade-1_X	Dino-Group-II-Clade-1_X_sp.	-0.0244807	Neg	Protist-Protist
ASV9531	Eukaryota	Dinophyceae	Gymnodiniales	Gymnodiniaceae	Unassigned Gymnodiniaceae (Family)	Unassigned Gymnodiniaceae (Family)	ASV8126	Eukaryota	Spirotrichea	Choreotrichida	Strobilidiidae_I	Pelagostrobilidium	Pelagostrobilidium_sp.	0.0329831	Pos	Protist-Protist
ASV9531	Eukaryota	Dinophyceae	Gymnodiniales	Gymnodiniaceae	Unassigned Gymnodiniaceae (Family)	Unassigned Gymnodiniaceae (Family)	ASV2860	Eukaryota	Bacillariophyta	Bacillariophyta_X	Polar-centric-Mediophyceae	Thalassiosira	Thalassiosira_mala	-0.0840375	Neg	Protist-Protist
ASV9531	Eukaryota	Dinophyceae	Gymnodiniales	Gymnodiniaceae	Unassigned Gymnodiniaceae (Family)	Unassigned Gymnodiniaceae (Family)	ASV2520	Eukaryota	Bacillariophyta	Bacillariophyta_X	Polar-centric-Mediophyceae	Chaetoceros	Chaetoceros_pumilum	-0.235097	Neg	Protist-Protist
ASV9531	Eukaryota	Dinophyceae	Gymnodiniales	Gymnodiniaceae	Unassigned Gymnodiniaceae (Family)	Unassigned Gymnodiniaceae (Family)	ASV9508	Eukaryota	Dinophyceae	Unassigned Dinophyceae (Class)	Unassigned Dinophyceae (Class)	Unassigned Dinophyceae (Class)	Unassigned Dinophyceae (Class)	0.0917348	Pos	Protist-Protist
ASV9536	Eukaryota	Dinophyceae	Gymnodiniales	Gymnodiniaceae	Gymnodinium	Gymnodinium_sp.	ASV8544	Eukaryota	Syndiniales	Dino-Group-II	Dino-Group-II-Clade-1	Dino-Group-II-Clade-1_X	Dino-Group-II-Clade-1_X_sp.	0.218757	Pos	Protist-Protist
ASV9536	Eukaryota	Dinophyceae	Gymnodiniales	Gymnodiniaceae	Gymnodinium	Gymnodinium_sp.	ASV515	Eukaryota	Filosa-Imbricatea	Filosa-Imbricatea_X	Filosa-Imbricatea_XX	Filosa-Imbricatea_XXX	Filosa-Imbricatea_XXX_sp.	0.109905	Pos	Protist-Protist
ASV9536	Eukaryota	Dinophyceae	Gymnodiniales	Gymnodiniaceae	Gymnodinium	Gymnodinium_sp.	ASV63	Eukaryota	Bacillariophyta	Bacillariophyta_X	Radial-centric-basal-Coscinodiscophyceae	Corethron	Corethron_hystrix	-0.254574	Neg	Protist-Protist
ASV9536	Eukaryota	Dinophyceae	Gymnodiniales	Gymnodiniaceae	Gymnodinium	Gymnodinium_sp.	ASV2860	Eukaryota	Bacillariophyta	Bacillariophyta_X	Polar-centric-Mediophyceae	Thalassiosira	Thalassiosira_mala	0.0123881	Pos	Protist-Protist
ASV9536	Eukaryota	Dinophyceae	Gymnodiniales	Gymnodiniaceae	Gymnodinium	Gymnodinium_sp.	ASV9531	Eukaryota	Dinophyceae	Gymnodiniales	Gymnodiniaceae	Unassigned Gymnodiniaceae (Family)	Unassigned Gymnodiniaceae (Family)	-0.00172973	Neg	Protist-Protist
ASV9536	Eukaryota	Dinophyceae	Gymnodiniales	Gymnodiniaceae	Gymnodinium	Gymnodinium_sp.	ASV3507	Eukaryota	MAST-1	MAST-1C	MAST-1C_X	MAST-1C_XX	MAST-1C_XX_sp.	0.0764141	Pos	Protist-Protist
ASV9565	Eukaryota	Dinophyceae	Unassigned Dinophyceae (Class)	Unassigned Dinophyceae (Class)	Unassigned Dinophyceae (Class)	Unassigned Dinophyceae (Class)	ASV9486	Eukaryota	Dinophyceae	Gymnodiniales	Gymnodiniaceae	Gymnodinium	Gymnodinium_sp.	0.157457	Pos	Protist-Protist
ASV9565	Eukaryota	Dinophyceae	Unassigned Dinophyceae (Class)	Unassigned Dinophyceae (Class)	Unassigned Dinophyceae (Class)	Unassigned Dinophyceae (Class)	ASV2920	Eukaryota	Bacillariophyta	Bacillariophyta_X	Polar-centric-Mediophyceae	Skeletonema	Skeletonema_sp.	0.162941	Pos	Protist-Protist
ASV9565	Eukaryota	Dinophyceae	Unassigned Dinophyceae (Class)	Unassigned Dinophyceae (Class)	Unassigned Dinophyceae (Class)	Unassigned Dinophyceae (Class)	ASV9507	Eukaryota	Dinophyceae	Unassigned Dinophyceae (Class)	Unassigned Dinophyceae (Class)	Unassigned Dinophyceae (Class)	Unassigned Dinophyceae (Class)	0.0275185	Pos	Protist-Protist
ASV9565	Eukaryota	Dinophyceae	Unassigned Dinophyceae (Class)	Unassigned Dinophyceae (Class)	Unassigned Dinophyceae (Class)	Unassigned Dinophyceae (Class)	ASV2637	Eukaryota	Bacillariophyta	Bacillariophyta_X	Polar-centric-Mediophyceae	Unassigned Polar-centric-Mediophyceae (Family)	Unassigned Polar-centric-Mediophyceae (Family)	-0.0237668	Neg	Protist-Protist
ASV9565	Eukaryota	Dinophyceae	Unassigned Dinophyceae (Class)	Unassigned Dinophyceae (Class)	Unassigned Dinophyceae (Class)	Unassigned Dinophyceae (Class)	ASV9400	Eukaryota	Syndiniales	Dino-Group-III	Dino-Group-III_X	Dino-Group-III_XX	Dino-Group-III_XX_sp.	-0.123988	Neg	Protist-Protist
ASV9565	Eukaryota	Dinophyceae	Unassigned Dinophyceae (Class)	Unassigned Dinophyceae (Class)	Unassigned Dinophyceae (Class)	Unassigned Dinophyceae (Class)	ASV6398	Eukaryota	Katablepharidaceae	Katablepharidales	Katablepharidales_X	Leucocryptos	Leucocryptos_marina	-0.0448957	Neg	Protist-Protist
ASV9565	Eukaryota	Dinophyceae	Unassigned Dinophyceae (Class)	Unassigned Dinophyceae (Class)	Unassigned Dinophyceae (Class)	Unassigned Dinophyceae (Class)	ASV6926	Eukaryota	Pyramimonadales	Pyramimonadales_X	Pyramimonadales_XX	Unassigned Pyramimonadales_XX (Family)	Unassigned Pyramimonadales_XX (Family)	-0.0402445	Neg	Protist-Protist
ASV9565	Eukaryota	Dinophyceae	Unassigned Dinophyceae (Class)	Unassigned Dinophyceae (Class)	Unassigned Dinophyceae (Class)	Unassigned Dinophyceae (Class)	ASV2860	Eukaryota	Bacillariophyta	Bacillariophyta_X	Polar-centric-Mediophyceae	Thalassiosira	Thalassiosira_mala	0.00839783	Pos	Protist-Protist
ASV9584	Eukaryota	Dinophyceae	Gymnodiniales	Gymnodiniaceae	Polykrikos	Polykrikos_kofoidii	ASV2772	Eukaryota	Bacillariophyta	Bacillariophyta_X	Polar-centric-Mediophyceae	Cyclotella	Unassigned Cyclotella (Genus)	-0.114971	Neg	Protist-Protist
ASV9584	Eukaryota	Dinophyceae	Gymnodiniales	Gymnodiniaceae	Polykrikos	Polykrikos_kofoidii	ASV7744	Eukaryota	Spirotrichea	Strombidiida	Strombidiidae	Spirostrombidium	Spirostrombidium_agathae	-0.0142589	Neg	Protist-Protist
ASV9584	Eukaryota	Dinophyceae	Gymnodiniales	Gymnodiniaceae	Polykrikos	Polykrikos_kofoidii	ASV6246	Eukaryota	Telonemia_X	Telonemia_XX	Telonemia-Group-1	Telonemia-Group-1_X	Telonemia-Group-1_X_sp.	0.0206705	Pos	Protist-Protist
ASV9584	Eukaryota	Dinophyceae	Gymnodiniales	Gymnodiniaceae	Polykrikos	Polykrikos_kofoidii	ASV7892	Eukaryota	Spirotrichea	Tintinnida	TIN_04	Tintinnopsis_04	Tintinnopsis_parvula	0.118454	Pos	Protist-Protist
ASV9584	Eukaryota	Dinophyceae	Gymnodiniales	Gymnodiniaceae	Polykrikos	Polykrikos_kofoidii	ASV9400	Eukaryota	Syndiniales	Dino-Group-III	Dino-Group-III_X	Dino-Group-III_XX	Dino-Group-III_XX_sp.	-0.108421	Neg	Protist-Protist
ASV9584	Eukaryota	Dinophyceae	Gymnodiniales	Gymnodiniaceae	Polykrikos	Polykrikos_kofoidii	ASV8799	Eukaryota	Syndiniales	Dino-Group-II	Unassigned Dino-Group-II (Order)	Unassigned Dino-Group-II (Order)	Unassigned Dino-Group-II (Order)	-0.183747	Neg	Protist-Protist
ASV9584	Eukaryota	Dinophyceae	Gymnodiniales	Gymnodiniaceae	Polykrikos	Polykrikos_kofoidii	ASV8150	Eukaryota	Spirotrichea	Unassigned Spirotrichea (Class)	Unassigned Spirotrichea (Class)	Unassigned Spirotrichea (Class)	Unassigned Spirotrichea (Class)	0.123129	Pos	Protist-Protist
ASV9584	Eukaryota	Dinophyceae	Gymnodiniales	Gymnodiniaceae	Polykrikos	Polykrikos_kofoidii	ASV6398	Eukaryota	Katablepharidaceae	Katablepharidales	Katablepharidales_X	Leucocryptos	Leucocryptos_marina	-0.0726094	Neg	Protist-Protist
ASV9608	Eukaryota	Dinophyceae	Gymnodiniales	Gymnodiniaceae	Gymnodinium	Gymnodinium_sp.	ASV9507	Eukaryota	Dinophyceae	Unassigned Dinophyceae (Class)	Unassigned Dinophyceae (Class)	Unassigned Dinophyceae (Class)	Unassigned Dinophyceae (Class)	0.100039	Pos	Protist-Protist
ASV9608	Eukaryota	Dinophyceae	Gymnodiniales	Gymnodiniaceae	Gymnodinium	Gymnodinium_sp.	ASV7722	Eukaryota	Spirotrichea	Strombidiida	Strombidiidae_K	Strombidium_K	Strombidium_capitatum	-0.213079	Neg	Protist-Protist
ASV9608	Eukaryota	Dinophyceae	Gymnodiniales	Gymnodiniaceae	Gymnodinium	Gymnodinium_sp.	ASV8126	Eukaryota	Spirotrichea	Choreotrichida	Strobilidiidae_I	Pelagostrobilidium	Pelagostrobilidium_sp.	-0.0792388	Neg	Protist-Protist
ASV9608	Eukaryota	Dinophyceae	Gymnodiniales	Gymnodiniaceae	Gymnodinium	Gymnodinium_sp.	ASV2932	Eukaryota	Bacillariophyta	Bacillariophyta_X	Polar-centric-Mediophyceae	Skeletonema	Unassigned Skeletonema (Genus)	-0.172277	Neg	Protist-Protist
ASV9623	Eukaryota	Dinophyceae	Gymnodiniales	Gymnodiniaceae	Gymnodinium	Gymnodinium_sp.	ASV2520	Eukaryota	Bacillariophyta	Bacillariophyta_X	Polar-centric-Mediophyceae	Chaetoceros	Chaetoceros_pumilum	-0.0333323	Neg	Protist-Protist
ASV9623	Eukaryota	Dinophyceae	Gymnodiniales	Gymnodiniaceae	Gymnodinium	Gymnodinium_sp.	ASV515	Eukaryota	Filosa-Imbricatea	Filosa-Imbricatea_X	Filosa-Imbricatea_XX	Filosa-Imbricatea_XXX	Filosa-Imbricatea_XXX_sp.	-0.254534	Neg	Protist-Protist
ASV9623	Eukaryota	Dinophyceae	Gymnodiniales	Gymnodiniaceae	Gymnodinium	Gymnodinium_sp.	ASV4339	Eukaryota	MAST-12	MAST-12A	MAST-12A_X	MAST-12A_XX	MAST-12A_XX_sp.	0.00274551	Pos	Protist-Protist
ASV9623	Eukaryota	Dinophyceae	Gymnodiniales	Gymnodiniaceae	Gymnodinium	Gymnodinium_sp.	ASV7912	Eukaryota	Spirotrichea	Tintinnida	TIN_07	Tintinnopsis_07	Unassigned Tintinnopsis_07 (Genus)	-0.279597	Neg	Protist-Protist
ASV9628	Eukaryota	Dinophyceae	Gymnodiniales	Unassigned Gymnodiniales (Order)	Unassigned Gymnodiniales (Order)	Unassigned Gymnodiniales (Order)	ASV6274	Eukaryota	Telonemia_X	Telonemia_XX	Telonemia-Group-1	Telonemia-Group-1_X	Telonemia-Group-1_X_sp.	0.101459	Pos	Protist-Protist
ASV9628	Eukaryota	Dinophyceae	Gymnodiniales	Unassigned Gymnodiniales (Order)	Unassigned Gymnodiniales (Order)	Unassigned Gymnodiniales (Order)	ASV2734	Eukaryota	Bacillariophyta	Bacillariophyta_X	Radial-centric-basal-Coscinodiscophyceae	Guinardia	Guinardia_delicatula	0.198914	Pos	Protist-Protist
ASV9628	Eukaryota	Dinophyceae	Gymnodiniales	Unassigned Gymnodiniales (Order)	Unassigned Gymnodiniales (Order)	Unassigned Gymnodiniales (Order)	ASV7004	Eukaryota	Mamiellophyceae	Mamiellales	Bathycoccaceae	Ostreococcus	Ostreococcus_mediterraneus	-0.110062	Neg	Protist-Protist
ASV9628	Eukaryota	Dinophyceae	Gymnodiniales	Unassigned Gymnodiniales (Order)	Unassigned Gymnodiniales (Order)	Unassigned Gymnodiniales (Order)	ASV8364	Eukaryota	Syndiniales	Dino-Group-I	Dino-Group-I-Clade-1	Dino-Group-I-Clade-1_X	Dino-Group-I-Clade-1_X_sp.	0.316127	Pos	Protist-Protist
ASV9628	Eukaryota	Dinophyceae	Gymnodiniales	Unassigned Gymnodiniales (Order)	Unassigned Gymnodiniales (Order)	Unassigned Gymnodiniales (Order)	ASV2858	Eukaryota	Bacillariophyta	Bacillariophyta_X	Polar-centric-Mediophyceae	Unassigned Polar-centric-Mediophyceae (Family)	Unassigned Polar-centric-Mediophyceae (Family)	0.00278589	Pos	Protist-Protist
ASV9628	Eukaryota	Dinophyceae	Gymnodiniales	Unassigned Gymnodiniales (Order)	Unassigned Gymnodiniales (Order)	Unassigned Gymnodiniales (Order)	ASV2888	Eukaryota	Bacillariophyta	Bacillariophyta_X	Polar-centric-Mediophyceae	Thalassiosira	Unassigned Thalassiosira (Genus)	0.066273	Pos	Protist-Protist
ASV9628	Eukaryota	Dinophyceae	Gymnodiniales	Unassigned Gymnodiniales (Order)	Unassigned Gymnodiniales (Order)	Unassigned Gymnodiniales (Order)	ASV840	Eukaryota	Filosa-Thecofilosea	Cryomonadida	Protaspa-lineage	Protaspa-lineage_X	Protaspa-lineage_X_sp.	-0.016365	Neg	Protist-Protist
ASV9631	Eukaryota	Dinophyceae	Gymnodiniales	Unassigned Gymnodiniales (Order)	Unassigned Gymnodiniales (Order)	Unassigned Gymnodiniales (Order)	ASV2823	Eukaryota	Bacillariophyta	Bacillariophyta_X	Polar-centric-Mediophyceae	Thalassiosira	Unassigned Thalassiosira (Genus)	-0.105352	Neg	Protist-Protist
ASV9631	Eukaryota	Dinophyceae	Gymnodiniales	Unassigned Gymnodiniales (Order)	Unassigned Gymnodiniales (Order)	Unassigned Gymnodiniales (Order)	ASV2700	Eukaryota	Bacillariophyta	Bacillariophyta_X	Radial-centric-basal-Coscinodiscophyceae	Actinocyclus	Actinocyclus_curvatulus	-0.169229	Neg	Protist-Protist
ASV9631	Eukaryota	Dinophyceae	Gymnodiniales	Unassigned Gymnodiniales (Order)	Unassigned Gymnodiniales (Order)	Unassigned Gymnodiniales (Order)	ASV1027	Eukaryota	Filosa-Thecofilosea	Ebriida	TAGIRI1-lineage	TAGIRI1-lineage_X	TAGIRI1-lineage_X_sp.	-0.123702	Neg	Protist-Protist
ASV9631	Eukaryota	Dinophyceae	Gymnodiniales	Unassigned Gymnodiniales (Order)	Unassigned Gymnodiniales (Order)	Unassigned Gymnodiniales (Order)	ASV8962	Eukaryota	Syndiniales	Dino-Group-II	Dino-Group-II-Clade-6	Dino-Group-II-Clade-6_X	Dino-Group-II-Clade-6_X_sp.	0.00504515	Pos	Protist-Protist
ASV9631	Eukaryota	Dinophyceae	Gymnodiniales	Unassigned Gymnodiniales (Order)	Unassigned Gymnodiniales (Order)	Unassigned Gymnodiniales (Order)	ASV6246	Eukaryota	Telonemia_X	Telonemia_XX	Telonemia-Group-1	Telonemia-Group-1_X	Telonemia-Group-1_X_sp.	-0.0358246	Neg	Protist-Protist
ASV9637	Eukaryota	Dinophyceae	Unassigned Dinophyceae (Class)	Unassigned Dinophyceae (Class)	Unassigned Dinophyceae (Class)	Unassigned Dinophyceae (Class)	ASV7877	Eukaryota	Spirotrichea	Tintinnida	TIN_11	TIN_11_X	TIN_11_X_sp.	0.0586493	Pos	Protist-Protist
ASV9637	Eukaryota	Dinophyceae	Unassigned Dinophyceae (Class)	Unassigned Dinophyceae (Class)	Unassigned Dinophyceae (Class)	Unassigned Dinophyceae (Class)	ASV7912	Eukaryota	Spirotrichea	Tintinnida	TIN_07	Tintinnopsis_07	Unassigned Tintinnopsis_07 (Genus)	0.0839122	Pos	Protist-Protist
ASV9637	Eukaryota	Dinophyceae	Unassigned Dinophyceae (Class)	Unassigned Dinophyceae (Class)	Unassigned Dinophyceae (Class)	Unassigned Dinophyceae (Class)	ASV9608	Eukaryota	Dinophyceae	Gymnodiniales	Gymnodiniaceae	Gymnodinium	Gymnodinium_sp.	0.11923	Pos	Protist-Protist
ASV9637	Eukaryota	Dinophyceae	Unassigned Dinophyceae (Class)	Unassigned Dinophyceae (Class)	Unassigned Dinophyceae (Class)	Unassigned Dinophyceae (Class)	ASV7901	Eukaryota	Spirotrichea	Tintinnida	TIN_05	Tintinnopsis_05	Unassigned Tintinnopsis_05 (Genus)	0.354685	Pos	Protist-Protist
ASV9637	Eukaryota	Dinophyceae	Unassigned Dinophyceae (Class)	Unassigned Dinophyceae (Class)	Unassigned Dinophyceae (Class)	Unassigned Dinophyceae (Class)	ASV4339	Eukaryota	MAST-12	MAST-12A	MAST-12A_X	MAST-12A_XX	MAST-12A_XX_sp.	-0.00162289	Neg	Protist-Protist
ASV9637	Eukaryota	Dinophyceae	Unassigned Dinophyceae (Class)	Unassigned Dinophyceae (Class)	Unassigned Dinophyceae (Class)	Unassigned Dinophyceae (Class)	ASV2932	Eukaryota	Bacillariophyta	Bacillariophyta_X	Polar-centric-Mediophyceae	Skeletonema	Unassigned Skeletonema (Genus)	-0.0529115	Neg	Protist-Protist
ASV9659	Eukaryota	Dinophyceae	Peridiniales	Heterocapsaceae	Heterocapsa	Unassigned Heterocapsa (Genus)	ASV6521	Eukaryota	Cryptophyceae	Cryptomonadales	Cryptomonadales_X	Teleaulax	Unassigned Teleaulax (Genus)	0.0941508	Pos	Protist-Protist
ASV9659	Eukaryota	Dinophyceae	Peridiniales	Heterocapsaceae	Heterocapsa	Unassigned Heterocapsa (Genus)	ASV6453	Eukaryota	Cryptophyceae	Cryptomonadales	Cryptomonadales_X	Plagioselmis	Plagioselmis_prolonga	0.406548	Pos	Protist-Protist
ASV9659	Eukaryota	Dinophyceae	Peridiniales	Heterocapsaceae	Heterocapsa	Unassigned Heterocapsa (Genus)	ASV9400	Eukaryota	Syndiniales	Dino-Group-III	Dino-Group-III_X	Dino-Group-III_XX	Dino-Group-III_XX_sp.	0.011972	Pos	Protist-Protist
ASV9659	Eukaryota	Dinophyceae	Peridiniales	Heterocapsaceae	Heterocapsa	Unassigned Heterocapsa (Genus)	ASV2772	Eukaryota	Bacillariophyta	Bacillariophyta_X	Polar-centric-Mediophyceae	Cyclotella	Unassigned Cyclotella (Genus)	0.0346807	Pos	Protist-Protist
ASV9659	Eukaryota	Dinophyceae	Peridiniales	Heterocapsaceae	Heterocapsa	Unassigned Heterocapsa (Genus)	ASV8364	Eukaryota	Syndiniales	Dino-Group-I	Dino-Group-I-Clade-1	Dino-Group-I-Clade-1_X	Dino-Group-I-Clade-1_X_sp.	0.232689	Pos	Protist-Protist
ASV9659	Eukaryota	Dinophyceae	Peridiniales	Heterocapsaceae	Heterocapsa	Unassigned Heterocapsa (Genus)	ASV2849	Eukaryota	Bacillariophyta	Bacillariophyta_X	Polar-centric-Mediophyceae	Thalassiosira	Unassigned Thalassiosira (Genus)	-0.250949	Neg	Protist-Protist
ASV9659	Eukaryota	Dinophyceae	Peridiniales	Heterocapsaceae	Heterocapsa	Unassigned Heterocapsa (Genus)	ASV9094	Eukaryota	Syndiniales	Dino-Group-I	Dino-Group-I-Clade-4	Dino-Group-I-Clade-4_X	Dino-Group-I-Clade-4_X_sp.	-0.0657861	Neg	Protist-Protist
ASV9660	Eukaryota	Dinophyceae	Peridiniales	Heterocapsaceae	Heterocapsa	Unassigned Heterocapsa (Genus)	ASV7793	Eukaryota	Spirotrichea	Strombidiida_B	Strombidiida_B_X	Strombidiida_B_XX	Strombidiida_B_XX_sp.	0.0528864	Pos	Protist-Protist
ASV9660	Eukaryota	Dinophyceae	Peridiniales	Heterocapsaceae	Heterocapsa	Unassigned Heterocapsa (Genus)	ASV2520	Eukaryota	Bacillariophyta	Bacillariophyta_X	Polar-centric-Mediophyceae	Chaetoceros	Chaetoceros_pumilum	-0.113008	Neg	Protist-Protist
ASV9660	Eukaryota	Dinophyceae	Peridiniales	Heterocapsaceae	Heterocapsa	Unassigned Heterocapsa (Genus)	ASV2545	Eukaryota	Bacillariophyta	Bacillariophyta_X	Polar-centric-Mediophyceae	Chaetoceros	Unassigned Chaetoceros (Genus)	0.0724357	Pos	Protist-Protist
ASV9660	Eukaryota	Dinophyceae	Peridiniales	Heterocapsaceae	Heterocapsa	Unassigned Heterocapsa (Genus)	ASV2497	Eukaryota	Bacillariophyta	Bacillariophyta_X	Polar-centric-Mediophyceae	Chaetoceros	Chaetoceros_socialis_debilis	-0.441652	Neg	Protist-Protist
ASV9660	Eukaryota	Dinophyceae	Peridiniales	Heterocapsaceae	Heterocapsa	Unassigned Heterocapsa (Genus)	ASV7877	Eukaryota	Spirotrichea	Tintinnida	TIN_11	TIN_11_X	TIN_11_X_sp.	-0.171676	Neg	Protist-Protist
ASV9660	Eukaryota	Dinophyceae	Peridiniales	Heterocapsaceae	Heterocapsa	Unassigned Heterocapsa (Genus)	ASV6274	Eukaryota	Telonemia_X	Telonemia_XX	Telonemia-Group-1	Telonemia-Group-1_X	Telonemia-Group-1_X_sp.	0.0119112	Pos	Protist-Protist
ASV9660	Eukaryota	Dinophyceae	Peridiniales	Heterocapsaceae	Heterocapsa	Unassigned Heterocapsa (Genus)	ASV6926	Eukaryota	Pyramimonadales	Pyramimonadales_X	Pyramimonadales_XX	Unassigned Pyramimonadales_XX (Family)	Unassigned Pyramimonadales_XX (Family)	0.150511	Pos	Protist-Protist
ASV9668	Eukaryota	Dinophyceae	Peridiniales	Heterocapsaceae	Heterocapsa	Heterocapsa_rotundata	ASV9536	Eukaryota	Dinophyceae	Gymnodiniales	Gymnodiniaceae	Gymnodinium	Gymnodinium_sp.	0.143365	Pos	Protist-Protist
ASV9668	Eukaryota	Dinophyceae	Peridiniales	Heterocapsaceae	Heterocapsa	Heterocapsa_rotundata	ASV2920	Eukaryota	Bacillariophyta	Bacillariophyta_X	Polar-centric-Mediophyceae	Skeletonema	Skeletonema_sp.	0.0195773	Pos	Protist-Protist
ASV9668	Eukaryota	Dinophyceae	Peridiniales	Heterocapsaceae	Heterocapsa	Heterocapsa_rotundata	ASV9507	Eukaryota	Dinophyceae	Unassigned Dinophyceae (Class)	Unassigned Dinophyceae (Class)	Unassigned Dinophyceae (Class)	Unassigned Dinophyceae (Class)	0.0214574	Pos	Protist-Protist
ASV9668	Eukaryota	Dinophyceae	Peridiniales	Heterocapsaceae	Heterocapsa	Heterocapsa_rotundata	ASV7770	Eukaryota	Spirotrichea	Strombidiida	Strombidiidae_M	Strombidium_M	Strombidium_M_sp.	-0.247387	Neg	Protist-Protist
ASV9668	Eukaryota	Dinophyceae	Peridiniales	Heterocapsaceae	Heterocapsa	Heterocapsa_rotundata	ASV2904	Eukaryota	Bacillariophyta	Bacillariophyta_X	Polar-centric-Mediophyceae	Skeletonema	Skeletonema_sp.	-0.253084	Neg	Protist-Protist
ASV9669	Eukaryota	Dinophyceae	Peridiniales	Heterocapsaceae	Heterocapsa	Heterocapsa_rotundata	ASV6406	Eukaryota	Katablepharidaceae	Katablepharidales	Katablepharidales_X	Katablepharidales_XX	Katablepharidales_XX_sp.	0.00463005	Pos	Protist-Protist
ASV9669	Eukaryota	Dinophyceae	Peridiniales	Heterocapsaceae	Heterocapsa	Heterocapsa_rotundata	ASV515	Eukaryota	Filosa-Imbricatea	Filosa-Imbricatea_X	Filosa-Imbricatea_XX	Filosa-Imbricatea_XXX	Filosa-Imbricatea_XXX_sp.	0.0445919	Pos	Protist-Protist
ASV9669	Eukaryota	Dinophyceae	Peridiniales	Heterocapsaceae	Heterocapsa	Heterocapsa_rotundata	ASV2700	Eukaryota	Bacillariophyta	Bacillariophyta_X	Radial-centric-basal-Coscinodiscophyceae	Actinocyclus	Actinocyclus_curvatulus	-0.135097	Neg	Protist-Protist
ASV9669	Eukaryota	Dinophyceae	Peridiniales	Heterocapsaceae	Heterocapsa	Heterocapsa_rotundata	ASV1075	Eukaryota	Filosa-Thecofilosea	Ebriida	Ebriidae	Ebria	Ebria_tripartita	0.292943	Pos	Protist-Protist
ASV9669	Eukaryota	Dinophyceae	Peridiniales	Heterocapsaceae	Heterocapsa	Heterocapsa_rotundata	ASV6486	Eukaryota	Cryptophyceae	Cryptomonadales	Cryptomonadales_X	Falcomonas	Falcomonas_daucoides	-0.0514329	Neg	Protist-Protist
ASV9880	Eukaryota	Dinophyceae	Suessiales	Suessiaceae	Unassigned Suessiaceae (Family)	Unassigned Suessiaceae (Family)	ASV6993	Eukaryota	Mamiellophyceae	Mamiellales	Mamiellaceae	Micromonas	Micromonas_bravo_B1	0.0434032	Pos	Protist-Protist
ASV9880	Eukaryota	Dinophyceae	Suessiales	Suessiaceae	Unassigned Suessiaceae (Family)	Unassigned Suessiaceae (Family)	ASV2869	Eukaryota	Bacillariophyta	Bacillariophyta_X	Polar-centric-Mediophyceae	Unassigned Polar-centric-Mediophyceae (Family)	Unassigned Polar-centric-Mediophyceae (Family)	-0.381029	Neg	Protist-Protist
ASV9880	Eukaryota	Dinophyceae	Suessiales	Suessiaceae	Unassigned Suessiaceae (Family)	Unassigned Suessiaceae (Family)	ASV63	Eukaryota	Bacillariophyta	Bacillariophyta_X	Radial-centric-basal-Coscinodiscophyceae	Corethron	Corethron_hystrix	0.341867	Pos	Protist-Protist
ASV9880	Eukaryota	Dinophyceae	Suessiales	Suessiaceae	Unassigned Suessiaceae (Family)	Unassigned Suessiaceae (Family)	ASV2823	Eukaryota	Bacillariophyta	Bacillariophyta_X	Polar-centric-Mediophyceae	Thalassiosira	Unassigned Thalassiosira (Genus)	-0.00550366	Neg	Protist-Protist
ASV9880	Eukaryota	Dinophyceae	Suessiales	Suessiaceae	Unassigned Suessiaceae (Family)	Unassigned Suessiaceae (Family)	ASV8512	Eukaryota	Syndiniales	Dino-Group-II	Dino-Group-II-Clade-1	Dino-Group-II-Clade-1_X	Dino-Group-II-Clade-1_X_sp.	0.555718	Pos	Protist-Protist
ASV9880	Eukaryota	Dinophyceae	Suessiales	Suessiaceae	Unassigned Suessiaceae (Family)	Unassigned Suessiaceae (Family)	ASV8206	Eukaryota	Filosa-Imbricatea	Filosa-Imbricatea_X	Novel-clade-2	Novel-clade-2_X	Novel-clade-2_X_sp.	0.00362442	Pos	Protist-Protist
ASV9884	Eukaryota	Dinophyceae	Suessiales	Suessiaceae	Biecheleria	Biecheleria_cincta	ASV9095	Eukaryota	Syndiniales	Dino-Group-I	Dino-Group-I-Clade-4	Dino-Group-I-Clade-4_X	Dino-Group-I-Clade-4_X_sp.	-0.130013	Neg	Protist-Protist
ASV9884	Eukaryota	Dinophyceae	Suessiales	Suessiaceae	Biecheleria	Biecheleria_cincta	ASV842	Eukaryota	Filosa-Thecofilosea	Cryomonadida	Protaspa-lineage	Protaspa-lineage_X	Protaspa-lineage_X_sp.	-0.293459	Neg	Protist-Protist
ASV9884	Eukaryota	Dinophyceae	Suessiales	Suessiaceae	Biecheleria	Biecheleria_cincta	ASV7234	Eukaryota	Bacillariophyta	Bacillariophyta_X	Polar-centric-Mediophyceae	Chaetoceros	Chaetoceros_debilis_3	0.0490004	Pos	Protist-Protist
ASV9884	Eukaryota	Dinophyceae	Suessiales	Suessiaceae	Biecheleria	Biecheleria_cincta	ASV6991	Eukaryota	Mamiellophyceae	Mamiellales	Mamiellaceae	Micromonas	Micromonas_clade_B4	-0.0548439	Neg	Protist-Protist
ASV9884	Eukaryota	Dinophyceae	Suessiales	Suessiaceae	Biecheleria	Biecheleria_cincta	ASV6517	Eukaryota	Cryptophyceae	Cryptomonadales	Cryptomonadales_X	Teleaulax	Teleaulax_sp.	-0.130339	Neg	Protist-Protist
ASV9925	Eukaryota	Dinophyceae	Peridiniales	Thoracosphaeraceae	Unassigned Thoracosphaeraceae (Family)	Unassigned Thoracosphaeraceae (Family)	ASV2718	Eukaryota	Bacillariophyta	Bacillariophyta_X	Radial-centric-basal-Coscinodiscophyceae	Coscinodiscus	Coscinodiscus_sp.	-0.0169752	Neg	Protist-Protist
ASV9925	Eukaryota	Dinophyceae	Peridiniales	Thoracosphaeraceae	Unassigned Thoracosphaeraceae (Family)	Unassigned Thoracosphaeraceae (Family)	ASV2545	Eukaryota	Bacillariophyta	Bacillariophyta_X	Polar-centric-Mediophyceae	Chaetoceros	Unassigned Chaetoceros (Genus)	-0.234575	Neg	Protist-Protist
ASV9925	Eukaryota	Dinophyceae	Peridiniales	Thoracosphaeraceae	Unassigned Thoracosphaeraceae (Family)	Unassigned Thoracosphaeraceae (Family)	ASV8144	Eukaryota	Spirotrichea	Choreotrichida	Strobilidiidae	Strobilidiidae_X	Strobilidiidae_X_sp.	0.110124	Pos	Protist-Protist
ASV9925	Eukaryota	Dinophyceae	Peridiniales	Thoracosphaeraceae	Unassigned Thoracosphaeraceae (Family)	Unassigned Thoracosphaeraceae (Family)	ASV842	Eukaryota	Filosa-Thecofilosea	Cryomonadida	Protaspa-lineage	Protaspa-lineage_X	Protaspa-lineage_X_sp.	-0.07478	Neg	Protist-Protist
ASV9925	Eukaryota	Dinophyceae	Peridiniales	Thoracosphaeraceae	Unassigned Thoracosphaeraceae (Family)	Unassigned Thoracosphaeraceae (Family)	ASV6453	Eukaryota	Cryptophyceae	Cryptomonadales	Cryptomonadales_X	Plagioselmis	Plagioselmis_prolonga	-0.045975	Neg	Protist-Protist
ASV9925	Eukaryota	Dinophyceae	Peridiniales	Thoracosphaeraceae	Unassigned Thoracosphaeraceae (Family)	Unassigned Thoracosphaeraceae (Family)	ASV8048	Eukaryota	Spirotrichea	Tintinnida	Tintinnidiidae	Tintinnidium	Unassigned Tintinnidium (Genus)	0.142638	Pos	Protist-Protist
ASV9925	Eukaryota	Dinophyceae	Peridiniales	Thoracosphaeraceae	Unassigned Thoracosphaeraceae (Family)	Unassigned Thoracosphaeraceae (Family)	ASV3537	Eukaryota	MAST-6	MAST-6_X	MAST-6_XX	MAST-6_XXX	MAST-6_XXX_sp.	0.0476683	Pos	Protist-Protist
ASV9992	Eukaryota	Dinophyceae	Peridiniales	Amphidiniopsidaceae	Islandinium	Islandinium_tricingulatum	ASV7089	Eukaryota	Pedinophyceae	Marsupiomonadales	Marsupiomonadaceae	Marsupiomonas	Unassigned Marsupiomonas (Genus)	-0.0490387	Neg	Protist-Protist
ASV9992	Eukaryota	Dinophyceae	Peridiniales	Amphidiniopsidaceae	Islandinium	Islandinium_tricingulatum	ASV1024	Eukaryota	Filosa-Thecofilosea	Ebriida	TAGIRI1-lineage	TAGIRI1-lineage_X	TAGIRI1-lineage_X_sp.	0.353321	Pos	Protist-Protist
ASV9992	Eukaryota	Dinophyceae	Peridiniales	Amphidiniopsidaceae	Islandinium	Islandinium_tricingulatum	ASV1027	Eukaryota	Filosa-Thecofilosea	Ebriida	TAGIRI1-lineage	TAGIRI1-lineage_X	TAGIRI1-lineage_X_sp.	0.111178	Pos	Protist-Protist
ASV9992	Eukaryota	Dinophyceae	Peridiniales	Amphidiniopsidaceae	Islandinium	Islandinium_tricingulatum	ASV8799	Eukaryota	Syndiniales	Dino-Group-II	Unassigned Dino-Group-II (Order)	Unassigned Dino-Group-II (Order)	Unassigned Dino-Group-II (Order)	0.366811	Pos	Protist-Protist
ASV9992	Eukaryota	Dinophyceae	Peridiniales	Amphidiniopsidaceae	Islandinium	Islandinium_tricingulatum	ASV2579	Eukaryota	Bacillariophyta	Bacillariophyta_X	Polar-centric-Mediophyceae	Chaetoceros	Unassigned Chaetoceros (Genus)	0.312996	Pos	Protist-Protist

## Sheet: Cluster 2
ASV 1	Domain 1	Class 1	Order 1	Family 1	Genus 1	Species 1	ASV 2	Domain 2	Class 2	Order 2	Family 2	Genus 2	Species 2	Weight	Sign	Type
bASV10806	Bacteria	Alphaproteobacteria	Puniceispirillales	SAR116 clade	Unassigned SAR116 clade (Family)	Unassigned SAR116 clade (Family)	bASV9873	Bacteria	Acidimicrobiia	Actinomarinales	Actinomarinaceae	Candidatus Actinomarina	Unassigned Candidatus Actinomarina (Genus)	0.0327403	Pos	Prokaryote-Prokaryote
bASV11454	Bacteria	Alphaproteobacteria	Rhodospirillales	AEGEAN-169 marine group	Unassigned AEGEAN-169 marine group (Family)	Unassigned AEGEAN-169 marine group (Family)	bASV9819	Bacteria	Acidimicrobiia	Actinomarinales	Actinomarinaceae	Candidatus Actinomarina	Unassigned Candidatus Actinomarina (Genus)	0.0734229	Pos	Prokaryote-Prokaryote
bASV11458	Bacteria	Alphaproteobacteria	Rhodospirillales	AEGEAN-169 marine group	Unassigned AEGEAN-169 marine group (Family)	Unassigned AEGEAN-169 marine group (Family)	bASV527	Bacteria	Alphaproteobacteria	SAR11 clade	Unassigned SAR11 clade (Order)	Unassigned SAR11 clade (Order)	Unassigned SAR11 clade (Order)	0.0218782	Pos	Prokaryote-Prokaryote
bASV11458	Bacteria	Alphaproteobacteria	Rhodospirillales	AEGEAN-169 marine group	Unassigned AEGEAN-169 marine group (Family)	Unassigned AEGEAN-169 marine group (Family)	bASV2747	Bacteria	Oxyphotobacteria	Synechococcales	Cyanobiaceae	Cyanobium PCC-6307	uncultured cyanobacterium	0.155847	Pos	Prokaryote-Prokaryote
bASV11458	Bacteria	Alphaproteobacteria	Rhodospirillales	AEGEAN-169 marine group	Unassigned AEGEAN-169 marine group (Family)	Unassigned AEGEAN-169 marine group (Family)	bASV658	Bacteria	Alphaproteobacteria	SAR11 clade	Clade I	Clade Ia	Unassigned Clade Ia (Genus)	0.111847	Pos	Prokaryote-Prokaryote
bASV11467	Bacteria	Alphaproteobacteria	Rhodospirillales	AEGEAN-169 marine group	Unassigned AEGEAN-169 marine group (Family)	Unassigned AEGEAN-169 marine group (Family)	bASV9823	Bacteria	Acidimicrobiia	Actinomarinales	Actinomarinaceae	Candidatus Actinomarina	Unassigned Candidatus Actinomarina (Genus)	-0.00385071	Neg	Prokaryote-Prokaryote
bASV11467	Bacteria	Alphaproteobacteria	Rhodospirillales	AEGEAN-169 marine group	Unassigned AEGEAN-169 marine group (Family)	Unassigned AEGEAN-169 marine group (Family)	bASV5455	Bacteria	Bacteroidia	Chitinophagales	Saprospiraceae	uncultured	uncultured bacterium	0.00217748	Pos	Prokaryote-Prokaryote
bASV11646	Bacteria	Alphaproteobacteria	Rhodobacterales	Rhodobacteraceae	Unassigned Rhodobacteraceae (Family)	Unassigned Rhodobacteraceae (Family)	bASV6554	Bacteria	Bacteroidia	Flavobacteriales	Flavobacteriaceae	NS4 marine group	Unassigned NS4 marine group (Genus)	0.0150122	Pos	Prokaryote-Prokaryote
bASV11705	Bacteria	Alphaproteobacteria	Rhodobacterales	Rhodobacteraceae	HIMB11	Unassigned HIMB11 (Genus)	bASV9821	Bacteria	Acidimicrobiia	Actinomarinales	Actinomarinaceae	Candidatus Actinomarina	Unassigned Candidatus Actinomarina (Genus)	0.0357797	Pos	Prokaryote-Prokaryote
bASV11706	Bacteria	Alphaproteobacteria	Rhodobacterales	Rhodobacteraceae	HIMB11	Unassigned HIMB11 (Genus)	bASV11705	Bacteria	Alphaproteobacteria	Rhodobacterales	Rhodobacteraceae	HIMB11	Unassigned HIMB11 (Genus)	-0.0835514	Neg	Prokaryote-Prokaryote
bASV11708	Bacteria	Alphaproteobacteria	Rhodobacterales	Rhodobacteraceae	HIMB11	Unassigned HIMB11 (Genus)	bASV9880	Bacteria	Acidimicrobiia	Actinomarinales	Actinomarinaceae	Candidatus Actinomarina	Unassigned Candidatus Actinomarina (Genus)	0.0379737	Pos	Prokaryote-Prokaryote
bASV11708	Bacteria	Alphaproteobacteria	Rhodobacterales	Rhodobacteraceae	HIMB11	Unassigned HIMB11 (Genus)	bASV6277	Bacteria	Bacteroidia	Flavobacteriales	Flavobacteriaceae	NS5 marine group	uncultured Flavobacterium sp.	0.111934	Pos	Prokaryote-Prokaryote
bASV11708	Bacteria	Alphaproteobacteria	Rhodobacterales	Rhodobacteraceae	HIMB11	Unassigned HIMB11 (Genus)	bASV11706	Bacteria	Alphaproteobacteria	Rhodobacterales	Rhodobacteraceae	HIMB11	Unassigned HIMB11 (Genus)	-0.40635	Neg	Prokaryote-Prokaryote
bASV11709	Bacteria	Alphaproteobacteria	Rhodobacterales	Rhodobacteraceae	HIMB11	Unassigned HIMB11 (Genus)	bASV3388	Archaea	Nitrososphaeria	Nitrosopumilales	Nitrosopumilaceae	Candidatus Nitrosopumilus	Unassigned Candidatus Nitrosopumilus (Genus)	0.0627235	Pos	Prokaryote-Prokaryote
bASV11709	Bacteria	Alphaproteobacteria	Rhodobacterales	Rhodobacteraceae	HIMB11	Unassigned HIMB11 (Genus)	bASV674	Bacteria	Alphaproteobacteria	SAR11 clade	Clade I	Clade Ia	Unassigned Clade Ia (Genus)	0.0252605	Pos	Prokaryote-Prokaryote
bASV11709	Bacteria	Alphaproteobacteria	Rhodobacterales	Rhodobacteraceae	HIMB11	Unassigned HIMB11 (Genus)	bASV5455	Bacteria	Bacteroidia	Chitinophagales	Saprospiraceae	uncultured	uncultured bacterium	0.0233401	Pos	Prokaryote-Prokaryote
bASV11709	Bacteria	Alphaproteobacteria	Rhodobacterales	Rhodobacteraceae	HIMB11	Unassigned HIMB11 (Genus)	bASV8494	Bacteria	Deltaproteobacteria	SAR324 clade(Marine group B)	uncultured bacterium HF0010_10I05	uncultured bacterium HF0010_10I05	uncultured bacterium HF0010_10I05	0.0574171	Pos	Prokaryote-Prokaryote
bASV11709	Bacteria	Alphaproteobacteria	Rhodobacterales	Rhodobacteraceae	HIMB11	Unassigned HIMB11 (Genus)	bASV3403	Archaea	Nitrososphaeria	Nitrosopumilales	Nitrosopumilaceae	Candidatus Nitrosopumilus	Unassigned Candidatus Nitrosopumilus (Genus)	0.138575	Pos	Prokaryote-Prokaryote
bASV11872	Bacteria	Alphaproteobacteria	Rhodobacterales	Rhodobacteraceae	Unassigned Rhodobacteraceae (Family)	Unassigned Rhodobacteraceae (Family)	bASV2746	Bacteria	Oxyphotobacteria	Synechococcales	Cyanobiaceae	Cyanobium PCC-6307	uncultured cyanobacterium	0.000571975	Pos	Prokaryote-Prokaryote
bASV11873	Bacteria	Alphaproteobacteria	Rhodobacterales	Rhodobacteraceae	Unassigned Rhodobacteraceae (Family)	Unassigned Rhodobacteraceae (Family)	bASV11872	Bacteria	Alphaproteobacteria	Rhodobacterales	Rhodobacteraceae	Unassigned Rhodobacteraceae (Family)	Unassigned Rhodobacteraceae (Family)	0.153868	Pos	Prokaryote-Prokaryote
bASV11960	Bacteria	Alphaproteobacteria	Parvibaculales	Parvibaculaceae	uncultured	uncultured alpha proteobacterium	bASV749	Bacteria	Alphaproteobacteria	SAR11 clade	Clade III	alpha proteobacterium HIMB114	alpha proteobacterium HIMB114	0.00476132	Pos	Prokaryote-Prokaryote
bASV12437	Bacteria	Alphaproteobacteria	Puniceispirillales	uncultured	Unassigned uncultured (Family)	Unassigned uncultured (Family)	bASV9822	Bacteria	Acidimicrobiia	Actinomarinales	Actinomarinaceae	Candidatus Actinomarina	Unassigned Candidatus Actinomarina (Genus)	0.013654	Pos	Prokaryote-Prokaryote
bASV12442	Bacteria	Alphaproteobacteria	Puniceispirillales	uncultured	Unassigned uncultured (Family)	Unassigned uncultured (Family)	bASV11709	Bacteria	Alphaproteobacteria	Rhodobacterales	Rhodobacteraceae	HIMB11	Unassigned HIMB11 (Genus)	0.0124111	Pos	Prokaryote-Prokaryote
bASV12442	Bacteria	Alphaproteobacteria	Puniceispirillales	uncultured	Unassigned uncultured (Family)	Unassigned uncultured (Family)	bASV6546	Bacteria	Bacteroidia	Flavobacteriales	Flavobacteriaceae	NS4 marine group	Unassigned NS4 marine group (Genus)	0.0224032	Pos	Prokaryote-Prokaryote
bASV12445	Bacteria	Alphaproteobacteria	Puniceispirillales	uncultured	Unassigned uncultured (Family)	Unassigned uncultured (Family)	bASV647	Bacteria	Alphaproteobacteria	SAR11 clade	Clade I	Clade Ia	Unassigned Clade Ia (Genus)	0.0102048	Pos	Prokaryote-Prokaryote
bASV12447	Bacteria	Alphaproteobacteria	Puniceispirillales	uncultured	Unassigned uncultured (Family)	Unassigned uncultured (Family)	bASV748	Bacteria	Alphaproteobacteria	SAR11 clade	Clade III	alpha proteobacterium HIMB114	alpha proteobacterium HIMB114	-0.0828495	Neg	Prokaryote-Prokaryote
bASV12447	Bacteria	Alphaproteobacteria	Puniceispirillales	uncultured	Unassigned uncultured (Family)	Unassigned uncultured (Family)	bASV752	Bacteria	Alphaproteobacteria	SAR11 clade	Clade III	alpha proteobacterium HIMB114	alpha proteobacterium HIMB114	0.0631312	Pos	Prokaryote-Prokaryote
bASV12447	Bacteria	Alphaproteobacteria	Puniceispirillales	uncultured	Unassigned uncultured (Family)	Unassigned uncultured (Family)	bASV12437	Bacteria	Alphaproteobacteria	Puniceispirillales	uncultured	Unassigned uncultured (Family)	Unassigned uncultured (Family)	-0.00609938	Neg	Prokaryote-Prokaryote
bASV12447	Bacteria	Alphaproteobacteria	Puniceispirillales	uncultured	Unassigned uncultured (Family)	Unassigned uncultured (Family)	bASV6546	Bacteria	Bacteroidia	Flavobacteriales	Flavobacteriaceae	NS4 marine group	Unassigned NS4 marine group (Genus)	-0.00834005	Neg	Prokaryote-Prokaryote
bASV15531	Bacteria	Gammaproteobacteria	Oceanospirillales	Litoricolaceae	Litoricola	uncultured bacterium	bASV676	Bacteria	Alphaproteobacteria	SAR11 clade	Clade I	Clade Ia	Unassigned Clade Ia (Genus)	0.137378	Pos	Prokaryote-Prokaryote
bASV15532	Bacteria	Gammaproteobacteria	Oceanospirillales	Litoricolaceae	Litoricola	uncultured bacterium	bASV9874	Bacteria	Acidimicrobiia	Actinomarinales	Actinomarinaceae	Candidatus Actinomarina	Unassigned Candidatus Actinomarina (Genus)	0.0134256	Pos	Prokaryote-Prokaryote
bASV15714	Bacteria	Gammaproteobacteria	Thiomicrospirales	Thioglobaceae	SUP05 cluster	uncultured bacterium	bASV5964	Bacteria	Bacteroidia	Flavobacteriales	Cryomorphaceae	uncultured	uncultured bacterium	0.142726	Pos	Prokaryote-Prokaryote
bASV15714	Bacteria	Gammaproteobacteria	Thiomicrospirales	Thioglobaceae	SUP05 cluster	uncultured bacterium	bASV759	Bacteria	Alphaproteobacteria	SAR11 clade	Clade III	alpha proteobacterium HIMB114	alpha proteobacterium HIMB114	0.117299	Pos	Prokaryote-Prokaryote
bASV15714	Bacteria	Gammaproteobacteria	Thiomicrospirales	Thioglobaceae	SUP05 cluster	uncultured bacterium	bASV11461	Bacteria	Alphaproteobacteria	Rhodospirillales	AEGEAN-169 marine group	Unassigned AEGEAN-169 marine group (Family)	Unassigned AEGEAN-169 marine group (Family)	0.0392386	Pos	Prokaryote-Prokaryote
bASV15714	Bacteria	Gammaproteobacteria	Thiomicrospirales	Thioglobaceae	SUP05 cluster	uncultured bacterium	bASV647	Bacteria	Alphaproteobacteria	SAR11 clade	Clade I	Clade Ia	Unassigned Clade Ia (Genus)	0.147317	Pos	Prokaryote-Prokaryote
bASV15716	Bacteria	Gammaproteobacteria	Thiomicrospirales	Thioglobaceae	SUP05 cluster	uncultured bacterium	bASV676	Bacteria	Alphaproteobacteria	SAR11 clade	Clade I	Clade Ia	Unassigned Clade Ia (Genus)	0.0636	Pos	Prokaryote-Prokaryote
bASV15719	Bacteria	Gammaproteobacteria	Thiomicrospirales	Thioglobaceae	SUP05 cluster	uncultured bacterium	bASV12442	Bacteria	Alphaproteobacteria	Puniceispirillales	uncultured	Unassigned uncultured (Family)	Unassigned uncultured (Family)	0.0037003	Pos	Prokaryote-Prokaryote
bASV15719	Bacteria	Gammaproteobacteria	Thiomicrospirales	Thioglobaceae	SUP05 cluster	uncultured bacterium	bASV576	Bacteria	Alphaproteobacteria	SAR11 clade	Clade II	Unassigned Clade II (Family)	Unassigned Clade II (Family)	0.0243527	Pos	Prokaryote-Prokaryote
bASV15719	Bacteria	Gammaproteobacteria	Thiomicrospirales	Thioglobaceae	SUP05 cluster	uncultured bacterium	bASV5467	Bacteria	Bacteroidia	Chitinophagales	Saprospiraceae	uncultured	uncultured bacterium	0.0270608	Pos	Prokaryote-Prokaryote
bASV15719	Bacteria	Gammaproteobacteria	Thiomicrospirales	Thioglobaceae	SUP05 cluster	uncultured bacterium	bASV3388	Archaea	Nitrososphaeria	Nitrosopumilales	Nitrosopumilaceae	Candidatus Nitrosopumilus	Unassigned Candidatus Nitrosopumilus (Genus)	0.0421559	Pos	Prokaryote-Prokaryote
bASV15719	Bacteria	Gammaproteobacteria	Thiomicrospirales	Thioglobaceae	SUP05 cluster	uncultured bacterium	bASV3403	Archaea	Nitrososphaeria	Nitrosopumilales	Nitrosopumilaceae	Candidatus Nitrosopumilus	Unassigned Candidatus Nitrosopumilus (Genus)	0.0857719	Pos	Prokaryote-Prokaryote
bASV15719	Bacteria	Gammaproteobacteria	Thiomicrospirales	Thioglobaceae	SUP05 cluster	uncultured bacterium	bASV9582	Bacteria	Acidimicrobiia	Microtrichales	Ilumatobacteraceae	uncultured	uncultured marine bacterium	0.0600871	Pos	Prokaryote-Prokaryote
bASV15721	Bacteria	Gammaproteobacteria	Thiomicrospirales	Thioglobaceae	SUP05 cluster	uncultured bacterium	bASV3390	Archaea	Nitrososphaeria	Nitrosopumilales	Nitrosopumilaceae	Candidatus Nitrosopumilus	Unassigned Candidatus Nitrosopumilus (Genus)	0.145527	Pos	Prokaryote-Prokaryote
bASV15724	Bacteria	Gammaproteobacteria	Thiomicrospirales	Thioglobaceae	SUP05 cluster	uncultured bacterium	bASV522	Bacteria	Alphaproteobacteria	SAR11 clade	Unassigned SAR11 clade (Order)	Unassigned SAR11 clade (Order)	Unassigned SAR11 clade (Order)	0.244258	Pos	Prokaryote-Prokaryote
bASV15724	Bacteria	Gammaproteobacteria	Thiomicrospirales	Thioglobaceae	SUP05 cluster	uncultured bacterium	bASV6205	Bacteria	Bacteroidia	Flavobacteriales	Flavobacteriaceae	NS5 marine group	uncultured Flavobacterium sp.	0.0518807	Pos	Prokaryote-Prokaryote
bASV15724	Bacteria	Gammaproteobacteria	Thiomicrospirales	Thioglobaceae	SUP05 cluster	uncultured bacterium	bASV9819	Bacteria	Acidimicrobiia	Actinomarinales	Actinomarinaceae	Candidatus Actinomarina	Unassigned Candidatus Actinomarina (Genus)	0.218641	Pos	Prokaryote-Prokaryote
bASV15724	Bacteria	Gammaproteobacteria	Thiomicrospirales	Thioglobaceae	SUP05 cluster	uncultured bacterium	bASV2750	Bacteria	Oxyphotobacteria	Synechococcales	Cyanobiaceae	Cyanobium PCC-6307	uncultured cyanobacterium	0.11251	Pos	Prokaryote-Prokaryote
bASV15724	Bacteria	Gammaproteobacteria	Thiomicrospirales	Thioglobaceae	SUP05 cluster	uncultured bacterium	bASV12437	Bacteria	Alphaproteobacteria	Puniceispirillales	uncultured	Unassigned uncultured (Family)	Unassigned uncultured (Family)	0.0188025	Pos	Prokaryote-Prokaryote
bASV15733	Bacteria	Gammaproteobacteria	Thiomicrospirales	Thioglobaceae	SUP05 cluster	uncultured bacterium	bASV6282	Bacteria	Bacteroidia	Flavobacteriales	Flavobacteriaceae	NS5 marine group	uncultured Flavobacterium sp.	0.054659	Pos	Prokaryote-Prokaryote
bASV15735	Bacteria	Gammaproteobacteria	Thiomicrospirales	Thioglobaceae	SUP05 cluster	uncultured bacterium	bASV15721	Bacteria	Gammaproteobacteria	Thiomicrospirales	Thioglobaceae	SUP05 cluster	uncultured bacterium	-0.0364374	Neg	Prokaryote-Prokaryote
bASV15935	Bacteria	Gammaproteobacteria	Thiotrichales	Thiotrichaceae	uncultured	uncultured bacterium JM9_B4	bASV2750	Bacteria	Oxyphotobacteria	Synechococcales	Cyanobiaceae	Cyanobium PCC-6307	uncultured cyanobacterium	0.0202828	Pos	Prokaryote-Prokaryote
bASV15935	Bacteria	Gammaproteobacteria	Thiotrichales	Thiotrichaceae	uncultured	uncultured bacterium JM9_B4	bASV10282	Bacteria	Verrucomicrobiae	Opitutales	Puniceicoccaceae	MB11C04 marine group	uncultured marine bacterium	0.0197383	Pos	Prokaryote-Prokaryote
bASV16042	Bacteria	Gammaproteobacteria	UBA10353 marine group	Unassigned UBA10353 marine group (Order)	Unassigned UBA10353 marine group (Order)	Unassigned UBA10353 marine group (Order)	bASV9829	Bacteria	Acidimicrobiia	Actinomarinales	Actinomarinaceae	Candidatus Actinomarina	Unassigned Candidatus Actinomarina (Genus)	0.0178822	Pos	Prokaryote-Prokaryote
bASV16042	Bacteria	Gammaproteobacteria	UBA10353 marine group	Unassigned UBA10353 marine group (Order)	Unassigned UBA10353 marine group (Order)	Unassigned UBA10353 marine group (Order)	bASV749	Bacteria	Alphaproteobacteria	SAR11 clade	Clade III	alpha proteobacterium HIMB114	alpha proteobacterium HIMB114	0.0833831	Pos	Prokaryote-Prokaryote
bASV16716	Bacteria	Gammaproteobacteria	SAR86 clade	uncultured gamma proteobacterium	uncultured gamma proteobacterium	uncultured gamma proteobacterium	bASV16715	Bacteria	Gammaproteobacteria	SAR86 clade	uncultured gamma proteobacterium	uncultured gamma proteobacterium	uncultured gamma proteobacterium	-0.223885	Neg	Prokaryote-Prokaryote
bASV16718	Bacteria	Gammaproteobacteria	SAR86 clade	uncultured gamma proteobacterium	uncultured gamma proteobacterium	uncultured gamma proteobacterium	bASV523	Bacteria	Alphaproteobacteria	SAR11 clade	Unassigned SAR11 clade (Order)	Unassigned SAR11 clade (Order)	Unassigned SAR11 clade (Order)	0.028802	Pos	Prokaryote-Prokaryote
bASV16718	Bacteria	Gammaproteobacteria	SAR86 clade	uncultured gamma proteobacterium	uncultured gamma proteobacterium	uncultured gamma proteobacterium	bASV676	Bacteria	Alphaproteobacteria	SAR11 clade	Clade I	Clade Ia	Unassigned Clade Ia (Genus)	0.0891733	Pos	Prokaryote-Prokaryote
bASV16718	Bacteria	Gammaproteobacteria	SAR86 clade	uncultured gamma proteobacterium	uncultured gamma proteobacterium	uncultured gamma proteobacterium	bASV15716	Bacteria	Gammaproteobacteria	Thiomicrospirales	Thioglobaceae	SUP05 cluster	uncultured bacterium	0.0975109	Pos	Prokaryote-Prokaryote
bASV16721	Bacteria	Gammaproteobacteria	SAR86 clade	uncultured gamma proteobacterium	uncultured gamma proteobacterium	uncultured gamma proteobacterium	bASV9822	Bacteria	Acidimicrobiia	Actinomarinales	Actinomarinaceae	Candidatus Actinomarina	Unassigned Candidatus Actinomarina (Genus)	0.0673997	Pos	Prokaryote-Prokaryote
bASV16776	Bacteria	Gammaproteobacteria	SAR86 clade	Unassigned SAR86 clade (Order)	Unassigned SAR86 clade (Order)	Unassigned SAR86 clade (Order)	bASV15733	Bacteria	Gammaproteobacteria	Thiomicrospirales	Thioglobaceae	SUP05 cluster	uncultured bacterium	0.198896	Pos	Prokaryote-Prokaryote
bASV16776	Bacteria	Gammaproteobacteria	SAR86 clade	Unassigned SAR86 clade (Order)	Unassigned SAR86 clade (Order)	Unassigned SAR86 clade (Order)	bASV6282	Bacteria	Bacteroidia	Flavobacteriales	Flavobacteriaceae	NS5 marine group	uncultured Flavobacterium sp.	0.0253965	Pos	Prokaryote-Prokaryote
bASV16777	Bacteria	Gammaproteobacteria	SAR86 clade	Unassigned SAR86 clade (Order)	Unassigned SAR86 clade (Order)	Unassigned SAR86 clade (Order)	bASV564	Bacteria	Alphaproteobacteria	SAR11 clade	Clade II	Unassigned Clade II (Family)	Unassigned Clade II (Family)	0.00958499	Pos	Prokaryote-Prokaryote
bASV16777	Bacteria	Gammaproteobacteria	SAR86 clade	Unassigned SAR86 clade (Order)	Unassigned SAR86 clade (Order)	Unassigned SAR86 clade (Order)	bASV6201	Bacteria	Bacteroidia	Flavobacteriales	Flavobacteriaceae	NS5 marine group	uncultured Flavobacterium sp.	0.0448736	Pos	Prokaryote-Prokaryote
bASV16777	Bacteria	Gammaproteobacteria	SAR86 clade	Unassigned SAR86 clade (Order)	Unassigned SAR86 clade (Order)	Unassigned SAR86 clade (Order)	bASV15724	Bacteria	Gammaproteobacteria	Thiomicrospirales	Thioglobaceae	SUP05 cluster	uncultured bacterium	0.0667928	Pos	Prokaryote-Prokaryote
bASV16777	Bacteria	Gammaproteobacteria	SAR86 clade	Unassigned SAR86 clade (Order)	Unassigned SAR86 clade (Order)	Unassigned SAR86 clade (Order)	bASV5906	Bacteria	Bacteroidia	Flavobacteriales	Cryomorphaceae	uncultured	Unassigned uncultured (Genus)	0.00238695	Pos	Prokaryote-Prokaryote
bASV16778	Bacteria	Gammaproteobacteria	SAR86 clade	Unassigned SAR86 clade (Order)	Unassigned SAR86 clade (Order)	Unassigned SAR86 clade (Order)	bASV9822	Bacteria	Acidimicrobiia	Actinomarinales	Actinomarinaceae	Candidatus Actinomarina	Unassigned Candidatus Actinomarina (Genus)	0.084071	Pos	Prokaryote-Prokaryote
bASV16778	Bacteria	Gammaproteobacteria	SAR86 clade	Unassigned SAR86 clade (Order)	Unassigned SAR86 clade (Order)	Unassigned SAR86 clade (Order)	bASV755	Bacteria	Alphaproteobacteria	SAR11 clade	Clade III	alpha proteobacterium HIMB114	alpha proteobacterium HIMB114	0.22548	Pos	Prokaryote-Prokaryote
bASV16783	Bacteria	Gammaproteobacteria	SAR86 clade	Unassigned SAR86 clade (Order)	Unassigned SAR86 clade (Order)	Unassigned SAR86 clade (Order)	bASV15532	Bacteria	Gammaproteobacteria	Oceanospirillales	Litoricolaceae	Litoricola	uncultured bacterium	0.0019634	Pos	Prokaryote-Prokaryote
bASV16783	Bacteria	Gammaproteobacteria	SAR86 clade	Unassigned SAR86 clade (Order)	Unassigned SAR86 clade (Order)	Unassigned SAR86 clade (Order)	bASV8507	Bacteria	Deltaproteobacteria	SAR324 clade(Marine group B)	uncultured bacterium HF0010_10I05	uncultured bacterium HF0010_10I05	uncultured bacterium HF0010_10I05	0.0287209	Pos	Prokaryote-Prokaryote
bASV17082	Bacteria	Gammaproteobacteria	Betaproteobacteriales	Nitrosomonadaceae	Unassigned Nitrosomonadaceae (Family)	Unassigned Nitrosomonadaceae (Family)	bASV12445	Bacteria	Alphaproteobacteria	Puniceispirillales	uncultured	Unassigned uncultured (Family)	Unassigned uncultured (Family)	0.0143005	Pos	Prokaryote-Prokaryote
bASV17082	Bacteria	Gammaproteobacteria	Betaproteobacteriales	Nitrosomonadaceae	Unassigned Nitrosomonadaceae (Family)	Unassigned Nitrosomonadaceae (Family)	bASV564	Bacteria	Alphaproteobacteria	SAR11 clade	Clade II	Unassigned Clade II (Family)	Unassigned Clade II (Family)	0.039824	Pos	Prokaryote-Prokaryote
bASV17131	Bacteria	Gammaproteobacteria	Betaproteobacteriales	Nitrosomonadaceae	IS-44	uncultured beta proteobacterium	bASV3418	Archaea	Nitrososphaeria	Nitrosopumilales	Nitrosopumilaceae	Candidatus Nitrosopumilus	Unassigned Candidatus Nitrosopumilus (Genus)	0.0841955	Pos	Prokaryote-Prokaryote
bASV17134	Bacteria	Gammaproteobacteria	Betaproteobacteriales	Nitrosomonadaceae	IS-44	uncultured beta proteobacterium	bASV9820	Bacteria	Acidimicrobiia	Actinomarinales	Actinomarinaceae	Candidatus Actinomarina	Unassigned Candidatus Actinomarina (Genus)	0.0560694	Pos	Prokaryote-Prokaryote
bASV17134	Bacteria	Gammaproteobacteria	Betaproteobacteriales	Nitrosomonadaceae	IS-44	uncultured beta proteobacterium	bASV5967	Bacteria	Bacteroidia	Flavobacteriales	Cryomorphaceae	uncultured	uncultured bacterium	0.125974	Pos	Prokaryote-Prokaryote
bASV17134	Bacteria	Gammaproteobacteria	Betaproteobacteriales	Nitrosomonadaceae	IS-44	uncultured beta proteobacterium	bASV6277	Bacteria	Bacteroidia	Flavobacteriales	Flavobacteriaceae	NS5 marine group	uncultured Flavobacterium sp.	0.0500892	Pos	Prokaryote-Prokaryote
bASV17135	Bacteria	Gammaproteobacteria	Betaproteobacteriales	Nitrosomonadaceae	IS-44	uncultured beta proteobacterium	bASV522	Bacteria	Alphaproteobacteria	SAR11 clade	Unassigned SAR11 clade (Order)	Unassigned SAR11 clade (Order)	Unassigned SAR11 clade (Order)	0.0282467	Pos	Prokaryote-Prokaryote
bASV17135	Bacteria	Gammaproteobacteria	Betaproteobacteriales	Nitrosomonadaceae	IS-44	uncultured beta proteobacterium	bASV645	Bacteria	Alphaproteobacteria	SAR11 clade	Clade I	Clade Ia	Unassigned Clade Ia (Genus)	0.108156	Pos	Prokaryote-Prokaryote
bASV17216	Bacteria	Gammaproteobacteria	Betaproteobacteriales	Methylophilaceae	OM43 clade	Unassigned OM43 clade (Genus)	bASV661	Bacteria	Alphaproteobacteria	SAR11 clade	Clade I	Clade Ia	Unassigned Clade Ia (Genus)	0.110354	Pos	Prokaryote-Prokaryote
bASV17216	Bacteria	Gammaproteobacteria	Betaproteobacteriales	Methylophilaceae	OM43 clade	Unassigned OM43 clade (Genus)	bASV2747	Bacteria	Oxyphotobacteria	Synechococcales	Cyanobiaceae	Cyanobium PCC-6307	uncultured cyanobacterium	0.00389659	Pos	Prokaryote-Prokaryote
bASV17216	Bacteria	Gammaproteobacteria	Betaproteobacteriales	Methylophilaceae	OM43 clade	Unassigned OM43 clade (Genus)	bASV645	Bacteria	Alphaproteobacteria	SAR11 clade	Clade I	Clade Ia	Unassigned Clade Ia (Genus)	0.140032	Pos	Prokaryote-Prokaryote
bASV17219	Bacteria	Gammaproteobacteria	Betaproteobacteriales	Methylophilaceae	OM43 clade	Unassigned OM43 clade (Genus)	bASV2748	Bacteria	Oxyphotobacteria	Synechococcales	Cyanobiaceae	Cyanobium PCC-6307	uncultured cyanobacterium	0.00243703	Pos	Prokaryote-Prokaryote
bASV17219	Bacteria	Gammaproteobacteria	Betaproteobacteriales	Methylophilaceae	OM43 clade	Unassigned OM43 clade (Genus)	bASV680	Bacteria	Alphaproteobacteria	SAR11 clade	Clade I	Clade Ia	Unassigned Clade Ia (Genus)	0.014984	Pos	Prokaryote-Prokaryote
bASV17219	Bacteria	Gammaproteobacteria	Betaproteobacteriales	Methylophilaceae	OM43 clade	Unassigned OM43 clade (Genus)	bASV535	Bacteria	Alphaproteobacteria	SAR11 clade	Unassigned SAR11 clade (Order)	Unassigned SAR11 clade (Order)	Unassigned SAR11 clade (Order)	0.0324342	Pos	Prokaryote-Prokaryote
bASV17233	Bacteria	Gammaproteobacteria	Betaproteobacteriales	Methylophilaceae	OM43 clade	Unassigned OM43 clade (Genus)	bASV666	Bacteria	Alphaproteobacteria	SAR11 clade	Clade I	Clade Ia	Unassigned Clade Ia (Genus)	0.0315349	Pos	Prokaryote-Prokaryote
bASV17242	Bacteria	Gammaproteobacteria	Betaproteobacteriales	Methylophilaceae	OM43 clade	Unassigned OM43 clade (Genus)	bASV5906	Bacteria	Bacteroidia	Flavobacteriales	Cryomorphaceae	uncultured	Unassigned uncultured (Genus)	0.11551	Pos	Prokaryote-Prokaryote
bASV17243	Bacteria	Gammaproteobacteria	Betaproteobacteriales	Methylophilaceae	OM43 clade	Unassigned OM43 clade (Genus)	bASV534	Bacteria	Alphaproteobacteria	SAR11 clade	Unassigned SAR11 clade (Order)	Unassigned SAR11 clade (Order)	Unassigned SAR11 clade (Order)	0.0601411	Pos	Prokaryote-Prokaryote
bASV17243	Bacteria	Gammaproteobacteria	Betaproteobacteriales	Methylophilaceae	OM43 clade	Unassigned OM43 clade (Genus)	bASV15716	Bacteria	Gammaproteobacteria	Thiomicrospirales	Thioglobaceae	SUP05 cluster	uncultured bacterium	0.0654118	Pos	Prokaryote-Prokaryote
bASV17244	Bacteria	Gammaproteobacteria	Betaproteobacteriales	Methylophilaceae	OM43 clade	Unassigned OM43 clade (Genus)	bASV15735	Bacteria	Gammaproteobacteria	Thiomicrospirales	Thioglobaceae	SUP05 cluster	uncultured bacterium	-0.00333297	Neg	Prokaryote-Prokaryote
bASV17244	Bacteria	Gammaproteobacteria	Betaproteobacteriales	Methylophilaceae	OM43 clade	Unassigned OM43 clade (Genus)	bASV9829	Bacteria	Acidimicrobiia	Actinomarinales	Actinomarinaceae	Candidatus Actinomarina	Unassigned Candidatus Actinomarina (Genus)	0.00912207	Pos	Prokaryote-Prokaryote
bASV17731	Bacteria	Gammaproteobacteria	Cellvibrionales	Halieaceae	OM60(NOR5) clade	Unassigned OM60(NOR5) clade (Genus)	bASV3390	Archaea	Nitrososphaeria	Nitrosopumilales	Nitrosopumilaceae	Candidatus Nitrosopumilus	Unassigned Candidatus Nitrosopumilus (Genus)	0.0825835	Pos	Prokaryote-Prokaryote
bASV17731	Bacteria	Gammaproteobacteria	Cellvibrionales	Halieaceae	OM60(NOR5) clade	Unassigned OM60(NOR5) clade (Genus)	bASV9850	Bacteria	Acidimicrobiia	Actinomarinales	Actinomarinaceae	Candidatus Actinomarina	uncultured actinobacterium	0.0600897	Pos	Prokaryote-Prokaryote
bASV17739	Bacteria	Gammaproteobacteria	Cellvibrionales	Halieaceae	OM60(NOR5) clade	Unassigned OM60(NOR5) clade (Genus)	bASV680	Bacteria	Alphaproteobacteria	SAR11 clade	Clade I	Clade Ia	Unassigned Clade Ia (Genus)	-0.00122464	Neg	Prokaryote-Prokaryote
bASV17739	Bacteria	Gammaproteobacteria	Cellvibrionales	Halieaceae	OM60(NOR5) clade	Unassigned OM60(NOR5) clade (Genus)	bASV679	Bacteria	Alphaproteobacteria	SAR11 clade	Clade I	Clade Ia	Unassigned Clade Ia (Genus)	0.0718619	Pos	Prokaryote-Prokaryote
bASV3390	Archaea	Nitrososphaeria	Nitrosopumilales	Nitrosopumilaceae	Candidatus Nitrosopumilus	Unassigned Candidatus Nitrosopumilus (Genus)	bASV527	Bacteria	Alphaproteobacteria	SAR11 clade	Unassigned SAR11 clade (Order)	Unassigned SAR11 clade (Order)	Unassigned SAR11 clade (Order)	0.0476799	Pos	Prokaryote-Prokaryote
bASV3418	Archaea	Nitrososphaeria	Nitrosopumilales	Nitrosopumilaceae	Candidatus Nitrosopumilus	Unassigned Candidatus Nitrosopumilus (Genus)	bASV2748	Bacteria	Oxyphotobacteria	Synechococcales	Cyanobiaceae	Cyanobium PCC-6307	uncultured cyanobacterium	0.0419635	Pos	Prokaryote-Prokaryote
bASV3420	Archaea	Nitrososphaeria	Nitrosopumilales	Nitrosopumilaceae	Candidatus Nitrosopumilus	Unassigned Candidatus Nitrosopumilus (Genus)	bASV643	Bacteria	Alphaproteobacteria	SAR11 clade	Clade I	Clade Ia	Unassigned Clade Ia (Genus)	0.160489	Pos	Prokaryote-Prokaryote
bASV5467	Bacteria	Bacteroidia	Chitinophagales	Saprospiraceae	uncultured	uncultured bacterium	bASV3388	Archaea	Nitrososphaeria	Nitrosopumilales	Nitrosopumilaceae	Candidatus Nitrosopumilus	Unassigned Candidatus Nitrosopumilus (Genus)	0.00991191	Pos	Prokaryote-Prokaryote
bASV5899	Bacteria	Bacteroidia	Flavobacteriales	Cryomorphaceae	uncultured	Unassigned uncultured (Genus)	bASV679	Bacteria	Alphaproteobacteria	SAR11 clade	Clade I	Clade Ia	Unassigned Clade Ia (Genus)	0.0911546	Pos	Prokaryote-Prokaryote
bASV5906	Bacteria	Bacteroidia	Flavobacteriales	Cryomorphaceae	uncultured	Unassigned uncultured (Genus)	bASV2746	Bacteria	Oxyphotobacteria	Synechococcales	Cyanobiaceae	Cyanobium PCC-6307	uncultured cyanobacterium	0.0164654	Pos	Prokaryote-Prokaryote
bASV5967	Bacteria	Bacteroidia	Flavobacteriales	Cryomorphaceae	uncultured	uncultured bacterium	bASV576	Bacteria	Alphaproteobacteria	SAR11 clade	Clade II	Unassigned Clade II (Family)	Unassigned Clade II (Family)	0.0143671	Pos	Prokaryote-Prokaryote
bASV6193	Bacteria	Bacteroidia	Flavobacteriales	Flavobacteriaceae	NS5 marine group	uncultured Flavobacterium sp.	bASV676	Bacteria	Alphaproteobacteria	SAR11 clade	Clade I	Clade Ia	Unassigned Clade Ia (Genus)	0.0935351	Pos	Prokaryote-Prokaryote
bASV6193	Bacteria	Bacteroidia	Flavobacteriales	Flavobacteriaceae	NS5 marine group	uncultured Flavobacterium sp.	bASV759	Bacteria	Alphaproteobacteria	SAR11 clade	Clade III	alpha proteobacterium HIMB114	alpha proteobacterium HIMB114	0.071529	Pos	Prokaryote-Prokaryote
bASV6193	Bacteria	Bacteroidia	Flavobacteriales	Flavobacteriaceae	NS5 marine group	uncultured Flavobacterium sp.	bASV2748	Bacteria	Oxyphotobacteria	Synechococcales	Cyanobiaceae	Cyanobium PCC-6307	uncultured cyanobacterium	0.00794557	Pos	Prokaryote-Prokaryote
bASV6205	Bacteria	Bacteroidia	Flavobacteriales	Flavobacteriaceae	NS5 marine group	uncultured Flavobacterium sp.	bASV658	Bacteria	Alphaproteobacteria	SAR11 clade	Clade I	Clade Ia	Unassigned Clade Ia (Genus)	0.131169	Pos	Prokaryote-Prokaryote
bASV6205	Bacteria	Bacteroidia	Flavobacteriales	Flavobacteriaceae	NS5 marine group	uncultured Flavobacterium sp.	bASV527	Bacteria	Alphaproteobacteria	SAR11 clade	Unassigned SAR11 clade (Order)	Unassigned SAR11 clade (Order)	Unassigned SAR11 clade (Order)	0.00213206	Pos	Prokaryote-Prokaryote
bASV6205	Bacteria	Bacteroidia	Flavobacteriales	Flavobacteriaceae	NS5 marine group	uncultured Flavobacterium sp.	bASV3722	Archaea	Thermoplasmata	Marine Group II	marine metagenome	marine metagenome	marine metagenome	0.122831	Pos	Prokaryote-Prokaryote
bASV6279	Bacteria	Bacteroidia	Flavobacteriales	Flavobacteriaceae	NS5 marine group	uncultured Flavobacterium sp.	bASV632	Bacteria	Alphaproteobacteria	SAR11 clade	Clade I	Unassigned Clade I (Family)	Unassigned Clade I (Family)	0.0259408	Pos	Prokaryote-Prokaryote
bASV6279	Bacteria	Bacteroidia	Flavobacteriales	Flavobacteriaceae	NS5 marine group	uncultured Flavobacterium sp.	bASV6201	Bacteria	Bacteroidia	Flavobacteriales	Flavobacteriaceae	NS5 marine group	uncultured Flavobacterium sp.	0.00920664	Pos	Prokaryote-Prokaryote
bASV645	Bacteria	Alphaproteobacteria	SAR11 clade	Clade I	Clade Ia	Unassigned Clade Ia (Genus)	bASV549	Bacteria	Alphaproteobacteria	SAR11 clade	Clade II	Unassigned Clade II (Family)	Unassigned Clade II (Family)	0.200336	Pos	Prokaryote-Prokaryote
bASV6461	Bacteria	Bacteroidia	Flavobacteriales	Flavobacteriaceae	NS5 marine group	Unassigned NS5 marine group (Genus)	bASV6205	Bacteria	Bacteroidia	Flavobacteriales	Flavobacteriaceae	NS5 marine group	uncultured Flavobacterium sp.	0.0297149	Pos	Prokaryote-Prokaryote
bASV6461	Bacteria	Bacteroidia	Flavobacteriales	Flavobacteriaceae	NS5 marine group	Unassigned NS5 marine group (Genus)	bASV645	Bacteria	Alphaproteobacteria	SAR11 clade	Clade I	Clade Ia	Unassigned Clade Ia (Genus)	0.108957	Pos	Prokaryote-Prokaryote
bASV6477	Bacteria	Bacteroidia	Flavobacteriales	Flavobacteriaceae	NS5 marine group	Unassigned NS5 marine group (Genus)	bASV3722	Archaea	Thermoplasmata	Marine Group II	marine metagenome	marine metagenome	marine metagenome	0.0354124	Pos	Prokaryote-Prokaryote
bASV653	Bacteria	Alphaproteobacteria	SAR11 clade	Clade I	Clade Ia	Unassigned Clade Ia (Genus)	bASV645	Bacteria	Alphaproteobacteria	SAR11 clade	Clade I	Clade Ia	Unassigned Clade Ia (Genus)	0.07621	Pos	Prokaryote-Prokaryote
bASV6547	Bacteria	Bacteroidia	Flavobacteriales	Flavobacteriaceae	NS4 marine group	Unassigned NS4 marine group (Genus)	bASV2747	Bacteria	Oxyphotobacteria	Synechococcales	Cyanobiaceae	Cyanobium PCC-6307	uncultured cyanobacterium	0.147593	Pos	Prokaryote-Prokaryote
bASV655	Bacteria	Alphaproteobacteria	SAR11 clade	Clade I	Clade Ia	Unassigned Clade Ia (Genus)	bASV642	Bacteria	Alphaproteobacteria	SAR11 clade	Clade I	Clade Ia	Unassigned Clade Ia (Genus)	-0.0357414	Neg	Prokaryote-Prokaryote
bASV655	Bacteria	Alphaproteobacteria	SAR11 clade	Clade I	Clade Ia	Unassigned Clade Ia (Genus)	bASV643	Bacteria	Alphaproteobacteria	SAR11 clade	Clade I	Clade Ia	Unassigned Clade Ia (Genus)	0.0651331	Pos	Prokaryote-Prokaryote
bASV655	Bacteria	Alphaproteobacteria	SAR11 clade	Clade I	Clade Ia	Unassigned Clade Ia (Genus)	bASV652	Bacteria	Alphaproteobacteria	SAR11 clade	Clade I	Clade Ia	Unassigned Clade Ia (Genus)	-0.0778267	Neg	Prokaryote-Prokaryote
bASV6550	Bacteria	Bacteroidia	Flavobacteriales	Flavobacteriaceae	NS4 marine group	Unassigned NS4 marine group (Genus)	bASV2750	Bacteria	Oxyphotobacteria	Synechococcales	Cyanobiaceae	Cyanobium PCC-6307	uncultured cyanobacterium	0.0104349	Pos	Prokaryote-Prokaryote
bASV6550	Bacteria	Bacteroidia	Flavobacteriales	Flavobacteriaceae	NS4 marine group	Unassigned NS4 marine group (Genus)	bASV534	Bacteria	Alphaproteobacteria	SAR11 clade	Unassigned SAR11 clade (Order)	Unassigned SAR11 clade (Order)	Unassigned SAR11 clade (Order)	0.0126635	Pos	Prokaryote-Prokaryote
bASV6554	Bacteria	Bacteroidia	Flavobacteriales	Flavobacteriaceae	NS4 marine group	Unassigned NS4 marine group (Genus)	bASV3390	Archaea	Nitrososphaeria	Nitrosopumilales	Nitrosopumilaceae	Candidatus Nitrosopumilus	Unassigned Candidatus Nitrosopumilus (Genus)	0.0694749	Pos	Prokaryote-Prokaryote
bASV6554	Bacteria	Bacteroidia	Flavobacteriales	Flavobacteriaceae	NS4 marine group	Unassigned NS4 marine group (Genus)	bASV653	Bacteria	Alphaproteobacteria	SAR11 clade	Clade I	Clade Ia	Unassigned Clade Ia (Genus)	0.0214606	Pos	Prokaryote-Prokaryote
bASV656	Bacteria	Alphaproteobacteria	SAR11 clade	Clade I	Clade Ia	Unassigned Clade Ia (Genus)	bASV652	Bacteria	Alphaproteobacteria	SAR11 clade	Clade I	Clade Ia	Unassigned Clade Ia (Genus)	-0.0956582	Neg	Prokaryote-Prokaryote
bASV657	Bacteria	Alphaproteobacteria	SAR11 clade	Clade I	Clade Ia	Unassigned Clade Ia (Genus)	bASV522	Bacteria	Alphaproteobacteria	SAR11 clade	Unassigned SAR11 clade (Order)	Unassigned SAR11 clade (Order)	Unassigned SAR11 clade (Order)	0.0155425	Pos	Prokaryote-Prokaryote
bASV658	Bacteria	Alphaproteobacteria	SAR11 clade	Clade I	Clade Ia	Unassigned Clade Ia (Genus)	bASV527	Bacteria	Alphaproteobacteria	SAR11 clade	Unassigned SAR11 clade (Order)	Unassigned SAR11 clade (Order)	Unassigned SAR11 clade (Order)	0.111875	Pos	Prokaryote-Prokaryote
bASV666	Bacteria	Alphaproteobacteria	SAR11 clade	Clade I	Clade Ia	Unassigned Clade Ia (Genus)	bASV520	Bacteria	Alphaproteobacteria	SAR11 clade	Unassigned SAR11 clade (Order)	Unassigned SAR11 clade (Order)	Unassigned SAR11 clade (Order)	0.153421	Pos	Prokaryote-Prokaryote
bASV674	Bacteria	Alphaproteobacteria	SAR11 clade	Clade I	Clade Ia	Unassigned Clade Ia (Genus)	bASV656	Bacteria	Alphaproteobacteria	SAR11 clade	Clade I	Clade Ia	Unassigned Clade Ia (Genus)	0.240402	Pos	Prokaryote-Prokaryote
bASV675	Bacteria	Alphaproteobacteria	SAR11 clade	Clade I	Clade Ia	Unassigned Clade Ia (Genus)	bASV656	Bacteria	Alphaproteobacteria	SAR11 clade	Clade I	Clade Ia	Unassigned Clade Ia (Genus)	0.25599	Pos	Prokaryote-Prokaryote
bASV675	Bacteria	Alphaproteobacteria	SAR11 clade	Clade I	Clade Ia	Unassigned Clade Ia (Genus)	bASV666	Bacteria	Alphaproteobacteria	SAR11 clade	Clade I	Clade Ia	Unassigned Clade Ia (Genus)	0.15747	Pos	Prokaryote-Prokaryote
bASV675	Bacteria	Alphaproteobacteria	SAR11 clade	Clade I	Clade Ia	Unassigned Clade Ia (Genus)	bASV653	Bacteria	Alphaproteobacteria	SAR11 clade	Clade I	Clade Ia	Unassigned Clade Ia (Genus)	0.00176304	Pos	Prokaryote-Prokaryote
bASV675	Bacteria	Alphaproteobacteria	SAR11 clade	Clade I	Clade Ia	Unassigned Clade Ia (Genus)	bASV527	Bacteria	Alphaproteobacteria	SAR11 clade	Unassigned SAR11 clade (Order)	Unassigned SAR11 clade (Order)	Unassigned SAR11 clade (Order)	0.00133639	Pos	Prokaryote-Prokaryote
bASV676	Bacteria	Alphaproteobacteria	SAR11 clade	Clade I	Clade Ia	Unassigned Clade Ia (Genus)	bASV657	Bacteria	Alphaproteobacteria	SAR11 clade	Clade I	Clade Ia	Unassigned Clade Ia (Genus)	0.618838	Pos	Prokaryote-Prokaryote
bASV679	Bacteria	Alphaproteobacteria	SAR11 clade	Clade I	Clade Ia	Unassigned Clade Ia (Genus)	bASV632	Bacteria	Alphaproteobacteria	SAR11 clade	Clade I	Unassigned Clade I (Family)	Unassigned Clade I (Family)	0.0233493	Pos	Prokaryote-Prokaryote
bASV680	Bacteria	Alphaproteobacteria	SAR11 clade	Clade I	Clade Ia	Unassigned Clade Ia (Genus)	bASV652	Bacteria	Alphaproteobacteria	SAR11 clade	Clade I	Clade Ia	Unassigned Clade Ia (Genus)	0.135266	Pos	Prokaryote-Prokaryote
bASV680	Bacteria	Alphaproteobacteria	SAR11 clade	Clade I	Clade Ia	Unassigned Clade Ia (Genus)	bASV656	Bacteria	Alphaproteobacteria	SAR11 clade	Clade I	Clade Ia	Unassigned Clade Ia (Genus)	-0.0850419	Neg	Prokaryote-Prokaryote
bASV680	Bacteria	Alphaproteobacteria	SAR11 clade	Clade I	Clade Ia	Unassigned Clade Ia (Genus)	bASV679	Bacteria	Alphaproteobacteria	SAR11 clade	Clade I	Clade Ia	Unassigned Clade Ia (Genus)	-0.0757827	Neg	Prokaryote-Prokaryote
bASV749	Bacteria	Alphaproteobacteria	SAR11 clade	Clade III	alpha proteobacterium HIMB114	alpha proteobacterium HIMB114	bASV662	Bacteria	Alphaproteobacteria	SAR11 clade	Clade I	Clade Ia	Unassigned Clade Ia (Genus)	0.205573	Pos	Prokaryote-Prokaryote
bASV8100	Bacteria	Pla3 lineage	unidentified marine bacterioplankton	unidentified marine bacterioplankton	unidentified marine bacterioplankton	unidentified marine bacterioplankton	bASV6311	Bacteria	Bacteroidia	Flavobacteriales	Flavobacteriaceae	NS5 marine group	marine metagenome	0.026391	Pos	Prokaryote-Prokaryote
bASV8100	Bacteria	Pla3 lineage	unidentified marine bacterioplankton	unidentified marine bacterioplankton	unidentified marine bacterioplankton	unidentified marine bacterioplankton	bASV535	Bacteria	Alphaproteobacteria	SAR11 clade	Unassigned SAR11 clade (Order)	Unassigned SAR11 clade (Order)	Unassigned SAR11 clade (Order)	0.0209462	Pos	Prokaryote-Prokaryote
bASV8348	Bacteria	Planctomycetacia	Planctomycetales	Rubinisphaeraceae	uncultured	uncultured Planctomycetia bacterium	bASV748	Bacteria	Alphaproteobacteria	SAR11 clade	Clade III	alpha proteobacterium HIMB114	alpha proteobacterium HIMB114	0.128337	Pos	Prokaryote-Prokaryote
bASV8494	Bacteria	Deltaproteobacteria	SAR324 clade(Marine group B)	uncultured bacterium HF0010_10I05	uncultured bacterium HF0010_10I05	uncultured bacterium HF0010_10I05	bASV6547	Bacteria	Bacteroidia	Flavobacteriales	Flavobacteriaceae	NS4 marine group	Unassigned NS4 marine group (Genus)	0.169007	Pos	Prokaryote-Prokaryote
bASV8494	Bacteria	Deltaproteobacteria	SAR324 clade(Marine group B)	uncultured bacterium HF0010_10I05	uncultured bacterium HF0010_10I05	uncultured bacterium HF0010_10I05	bASV5964	Bacteria	Bacteroidia	Flavobacteriales	Cryomorphaceae	uncultured	uncultured bacterium	0.102723	Pos	Prokaryote-Prokaryote
bASV8497	Bacteria	Deltaproteobacteria	SAR324 clade(Marine group B)	uncultured bacterium HF0010_10I05	uncultured bacterium HF0010_10I05	uncultured bacterium HF0010_10I05	bASV535	Bacteria	Alphaproteobacteria	SAR11 clade	Unassigned SAR11 clade (Order)	Unassigned SAR11 clade (Order)	Unassigned SAR11 clade (Order)	0.024202	Pos	Prokaryote-Prokaryote
bASV8499	Bacteria	Deltaproteobacteria	SAR324 clade(Marine group B)	uncultured bacterium HF0010_10I05	uncultured bacterium HF0010_10I05	uncultured bacterium HF0010_10I05	bASV8497	Bacteria	Deltaproteobacteria	SAR324 clade(Marine group B)	uncultured bacterium HF0010_10I05	uncultured bacterium HF0010_10I05	uncultured bacterium HF0010_10I05	-0.0376516	Neg	Prokaryote-Prokaryote
bASV8499	Bacteria	Deltaproteobacteria	SAR324 clade(Marine group B)	uncultured bacterium HF0010_10I05	uncultured bacterium HF0010_10I05	uncultured bacterium HF0010_10I05	bASV661	Bacteria	Alphaproteobacteria	SAR11 clade	Clade I	Clade Ia	Unassigned Clade Ia (Genus)	0.174057	Pos	Prokaryote-Prokaryote
bASV8507	Bacteria	Deltaproteobacteria	SAR324 clade(Marine group B)	uncultured bacterium HF0010_10I05	uncultured bacterium HF0010_10I05	uncultured bacterium HF0010_10I05	bASV8497	Bacteria	Deltaproteobacteria	SAR324 clade(Marine group B)	uncultured bacterium HF0010_10I05	uncultured bacterium HF0010_10I05	uncultured bacterium HF0010_10I05	-0.0416036	Neg	Prokaryote-Prokaryote
bASV9575	Bacteria	Acidimicrobiia	Microtrichales	Ilumatobacteraceae	uncultured	uncultured marine bacterium	bASV6205	Bacteria	Bacteroidia	Flavobacteriales	Flavobacteriaceae	NS5 marine group	uncultured Flavobacterium sp.	0.0552851	Pos	Prokaryote-Prokaryote
bASV9580	Bacteria	Acidimicrobiia	Microtrichales	Ilumatobacteraceae	uncultured	uncultured marine bacterium	bASV656	Bacteria	Alphaproteobacteria	SAR11 clade	Clade I	Clade Ia	Unassigned Clade Ia (Genus)	0.00464153	Pos	Prokaryote-Prokaryote
bASV9819	Bacteria	Acidimicrobiia	Actinomarinales	Actinomarinaceae	Candidatus Actinomarina	Unassigned Candidatus Actinomarina (Genus)	bASV759	Bacteria	Alphaproteobacteria	SAR11 clade	Clade III	alpha proteobacterium HIMB114	alpha proteobacterium HIMB114	0.0168935	Pos	Prokaryote-Prokaryote
bASV9819	Bacteria	Acidimicrobiia	Actinomarinales	Actinomarinaceae	Candidatus Actinomarina	Unassigned Candidatus Actinomarina (Genus)	bASV645	Bacteria	Alphaproteobacteria	SAR11 clade	Clade I	Clade Ia	Unassigned Clade Ia (Genus)	0.0116638	Pos	Prokaryote-Prokaryote
bASV9820	Bacteria	Acidimicrobiia	Actinomarinales	Actinomarinaceae	Candidatus Actinomarina	Unassigned Candidatus Actinomarina (Genus)	bASV5467	Bacteria	Bacteroidia	Chitinophagales	Saprospiraceae	uncultured	uncultured bacterium	0.0332721	Pos	Prokaryote-Prokaryote
bASV9821	Bacteria	Acidimicrobiia	Actinomarinales	Actinomarinaceae	Candidatus Actinomarina	Unassigned Candidatus Actinomarina (Genus)	bASV2747	Bacteria	Oxyphotobacteria	Synechococcales	Cyanobiaceae	Cyanobium PCC-6307	uncultured cyanobacterium	0.030978	Pos	Prokaryote-Prokaryote
bASV9822	Bacteria	Acidimicrobiia	Actinomarinales	Actinomarinaceae	Candidatus Actinomarina	Unassigned Candidatus Actinomarina (Genus)	bASV535	Bacteria	Alphaproteobacteria	SAR11 clade	Unassigned SAR11 clade (Order)	Unassigned SAR11 clade (Order)	Unassigned SAR11 clade (Order)	0.0876373	Pos	Prokaryote-Prokaryote
bASV9822	Bacteria	Acidimicrobiia	Actinomarinales	Actinomarinaceae	Candidatus Actinomarina	Unassigned Candidatus Actinomarina (Genus)	bASV547	Bacteria	Alphaproteobacteria	SAR11 clade	Clade II	Unassigned Clade II (Family)	Unassigned Clade II (Family)	0.110169	Pos	Prokaryote-Prokaryote
bASV9822	Bacteria	Acidimicrobiia	Actinomarinales	Actinomarinaceae	Candidatus Actinomarina	Unassigned Candidatus Actinomarina (Genus)	bASV2750	Bacteria	Oxyphotobacteria	Synechococcales	Cyanobiaceae	Cyanobium PCC-6307	uncultured cyanobacterium	0.0753385	Pos	Prokaryote-Prokaryote
bASV9822	Bacteria	Acidimicrobiia	Actinomarinales	Actinomarinaceae	Candidatus Actinomarina	Unassigned Candidatus Actinomarina (Genus)	bASV6550	Bacteria	Bacteroidia	Flavobacteriales	Flavobacteriaceae	NS4 marine group	Unassigned NS4 marine group (Genus)	0.0184209	Pos	Prokaryote-Prokaryote
bASV9823	Bacteria	Acidimicrobiia	Actinomarinales	Actinomarinaceae	Candidatus Actinomarina	Unassigned Candidatus Actinomarina (Genus)	bASV9820	Bacteria	Acidimicrobiia	Actinomarinales	Actinomarinaceae	Candidatus Actinomarina	Unassigned Candidatus Actinomarina (Genus)	-0.0397902	Neg	Prokaryote-Prokaryote
bASV9829	Bacteria	Acidimicrobiia	Actinomarinales	Actinomarinaceae	Candidatus Actinomarina	Unassigned Candidatus Actinomarina (Genus)	bASV9824	Bacteria	Acidimicrobiia	Actinomarinales	Actinomarinaceae	Candidatus Actinomarina	Unassigned Candidatus Actinomarina (Genus)	0.444914	Pos	Prokaryote-Prokaryote
bASV9829	Bacteria	Acidimicrobiia	Actinomarinales	Actinomarinaceae	Candidatus Actinomarina	Unassigned Candidatus Actinomarina (Genus)	bASV6192	Bacteria	Bacteroidia	Flavobacteriales	Flavobacteriaceae	NS5 marine group	uncultured Flavobacterium sp.	0.0174796	Pos	Prokaryote-Prokaryote
bASV9829	Bacteria	Acidimicrobiia	Actinomarinales	Actinomarinaceae	Candidatus Actinomarina	Unassigned Candidatus Actinomarina (Genus)	bASV6280	Bacteria	Bacteroidia	Flavobacteriales	Flavobacteriaceae	NS5 marine group	uncultured Flavobacterium sp.	0.0828673	Pos	Prokaryote-Prokaryote
bASV9830	Bacteria	Acidimicrobiia	Actinomarinales	Actinomarinaceae	Candidatus Actinomarina	Unassigned Candidatus Actinomarina (Genus)	bASV9823	Bacteria	Acidimicrobiia	Actinomarinales	Actinomarinaceae	Candidatus Actinomarina	Unassigned Candidatus Actinomarina (Genus)	-0.0175518	Neg	Prokaryote-Prokaryote
bASV9839	Bacteria	Acidimicrobiia	Actinomarinales	Actinomarinaceae	Candidatus Actinomarina	uncultured actinobacterium	bASV5455	Bacteria	Bacteroidia	Chitinophagales	Saprospiraceae	uncultured	uncultured bacterium	0.129485	Pos	Prokaryote-Prokaryote
bASV9850	Bacteria	Acidimicrobiia	Actinomarinales	Actinomarinaceae	Candidatus Actinomarina	uncultured actinobacterium	bASV6554	Bacteria	Bacteroidia	Flavobacteriales	Flavobacteriaceae	NS4 marine group	Unassigned NS4 marine group (Genus)	0.0267403	Pos	Prokaryote-Prokaryote
bASV9862	Bacteria	Acidimicrobiia	Actinomarinales	Actinomarinaceae	Candidatus Actinomarina	Unassigned Candidatus Actinomarina (Genus)	bASV5455	Bacteria	Bacteroidia	Chitinophagales	Saprospiraceae	uncultured	uncultured bacterium	0.0768102	Pos	Prokaryote-Prokaryote
bASV9872	Bacteria	Acidimicrobiia	Actinomarinales	Actinomarinaceae	Candidatus Actinomarina	Unassigned Candidatus Actinomarina (Genus)	bASV748	Bacteria	Alphaproteobacteria	SAR11 clade	Clade III	alpha proteobacterium HIMB114	alpha proteobacterium HIMB114	0.0700894	Pos	Prokaryote-Prokaryote
bASV9873	Bacteria	Acidimicrobiia	Actinomarinales	Actinomarinaceae	Candidatus Actinomarina	Unassigned Candidatus Actinomarina (Genus)	bASV6550	Bacteria	Bacteroidia	Flavobacteriales	Flavobacteriaceae	NS4 marine group	Unassigned NS4 marine group (Genus)	-0.0503566	Neg	Prokaryote-Prokaryote
bASV9874	Bacteria	Acidimicrobiia	Actinomarinales	Actinomarinaceae	Candidatus Actinomarina	Unassigned Candidatus Actinomarina (Genus)	bASV9873	Bacteria	Acidimicrobiia	Actinomarinales	Actinomarinaceae	Candidatus Actinomarina	Unassigned Candidatus Actinomarina (Genus)	-0.0445104	Neg	Prokaryote-Prokaryote
bASV9880	Bacteria	Acidimicrobiia	Actinomarinales	Actinomarinaceae	Candidatus Actinomarina	Unassigned Candidatus Actinomarina (Genus)	bASV9874	Bacteria	Acidimicrobiia	Actinomarinales	Actinomarinaceae	Candidatus Actinomarina	Unassigned Candidatus Actinomarina (Genus)	-0.0126192	Neg	Prokaryote-Prokaryote
ASV10027	Eukaryota	Dinophyceae	Unassigned Dinophyceae (Class)	Unassigned Dinophyceae (Class)	Unassigned Dinophyceae (Class)	Unassigned Dinophyceae (Class)	bASV535	Bacteria	Alphaproteobacteria	SAR11 clade	Unassigned SAR11 clade (Order)	Unassigned SAR11 clade (Order)	Unassigned SAR11 clade (Order)	-0.0168333	Neg	Prokaryote-Protist
ASV2011	Eukaryota	Bacillariophyta	Bacillariophyta_X	Raphid-pennate	Unassigned Raphid-pennate (Family)	Unassigned Raphid-pennate (Family)	bASV8348	Bacteria	Planctomycetacia	Planctomycetales	Rubinisphaeraceae	uncultured	uncultured Planctomycetia bacterium	-0.0341957	Neg	Prokaryote-Protist
ASV2081	Eukaryota	Bacillariophyta	Bacillariophyta_X	Raphid-pennate	Unassigned Raphid-pennate (Family)	Unassigned Raphid-pennate (Family)	bASV9681	Bacteria	Actinobacteria	Micrococcales	Microbacteriaceae	Candidatus Aquiluna	uncultured bacterium	0.124341	Pos	Prokaryote-Protist
ASV2105	Eukaryota	Bacillariophyta	Bacillariophyta_X	Raphid-pennate	Seminavis	Seminavis_sp.	bASV6311	Bacteria	Bacteroidia	Flavobacteriales	Flavobacteriaceae	NS5 marine group	marine metagenome	-0.00259392	Neg	Prokaryote-Protist
ASV2105	Eukaryota	Bacillariophyta	Bacillariophyta_X	Raphid-pennate	Seminavis	Seminavis_sp.	bASV9872	Bacteria	Acidimicrobiia	Actinomarinales	Actinomarinaceae	Candidatus Actinomarina	Unassigned Candidatus Actinomarina (Genus)	-0.032933	Neg	Prokaryote-Protist
ASV2491	Eukaryota	Bacillariophyta	Bacillariophyta_X	Polar-centric-Mediophyceae	Chaetoceros	Chaetoceros_sp_P._quinquecorne_endosymbiont	bASV17244	Bacteria	Gammaproteobacteria	Betaproteobacteriales	Methylophilaceae	OM43 clade	Unassigned OM43 clade (Genus)	0.0583048	Pos	Prokaryote-Protist
ASV2491	Eukaryota	Bacillariophyta	Bacillariophyta_X	Polar-centric-Mediophyceae	Chaetoceros	Chaetoceros_sp_P._quinquecorne_endosymbiont	bASV6477	Bacteria	Bacteroidia	Flavobacteriales	Flavobacteriaceae	NS5 marine group	Unassigned NS5 marine group (Genus)	-0.0914877	Neg	Prokaryote-Protist
ASV2519	Eukaryota	Bacillariophyta	Bacillariophyta_X	Polar-centric-Mediophyceae	Chaetoceros	Unassigned Chaetoceros (Genus)	bASV16722	Bacteria	Gammaproteobacteria	SAR86 clade	uncultured gamma proteobacterium	uncultured gamma proteobacterium	uncultured gamma proteobacterium	-0.0157269	Neg	Prokaryote-Protist
ASV2531	Eukaryota	Bacillariophyta	Bacillariophyta_X	Unassigned Bacillariophyta_X (Order)	Unassigned Bacillariophyta_X (Order)	Unassigned Bacillariophyta_X (Order)	bASV11461	Bacteria	Alphaproteobacteria	Rhodospirillales	AEGEAN-169 marine group	Unassigned AEGEAN-169 marine group (Family)	Unassigned AEGEAN-169 marine group (Family)	-0.00997941	Neg	Prokaryote-Protist
ASV2545	Eukaryota	Bacillariophyta	Bacillariophyta_X	Polar-centric-Mediophyceae	Chaetoceros	Unassigned Chaetoceros (Genus)	bASV576	Bacteria	Alphaproteobacteria	SAR11 clade	Clade II	Unassigned Clade II (Family)	Unassigned Clade II (Family)	0.00487327	Pos	Prokaryote-Protist
ASV2562	Eukaryota	Bacillariophyta	Bacillariophyta_X	Polar-centric-Mediophyceae	Chaetoceros	Chaetoceros_elegans	bASV9852	Bacteria	Acidimicrobiia	Actinomarinales	Actinomarinaceae	Candidatus Actinomarina	uncultured actinobacterium	-0.127662	Neg	Prokaryote-Protist
ASV2600	Eukaryota	Bacillariophyta	Bacillariophyta_X	Polar-centric-Mediophyceae	Chaetoceros	Chaetoceros_muellerii	bASV642	Bacteria	Alphaproteobacteria	SAR11 clade	Clade I	Clade Ia	Unassigned Clade Ia (Genus)	0.0150709	Pos	Prokaryote-Protist
ASV2600	Eukaryota	Bacillariophyta	Bacillariophyta_X	Polar-centric-Mediophyceae	Chaetoceros	Chaetoceros_muellerii	bASV9823	Bacteria	Acidimicrobiia	Actinomarinales	Actinomarinaceae	Candidatus Actinomarina	Unassigned Candidatus Actinomarina (Genus)	0.130226	Pos	Prokaryote-Protist
ASV2639	Eukaryota	Bacillariophyta	Bacillariophyta_X	Polar-centric-Mediophyceae	Ditylum	Unassigned Ditylum (Genus)	bASV15721	Bacteria	Gammaproteobacteria	Thiomicrospirales	Thioglobaceae	SUP05 cluster	uncultured bacterium	0.0353172	Pos	Prokaryote-Protist
ASV2659	Eukaryota	Bacillariophyta	Bacillariophyta_X	Polar-centric-Mediophyceae	Odontella	Odontella_mobiliensis	bASV6311	Bacteria	Bacteroidia	Flavobacteriales	Flavobacteriaceae	NS5 marine group	marine metagenome	-0.00815611	Neg	Prokaryote-Protist
ASV2723	Eukaryota	Bacillariophyta	Bacillariophyta_X	Radial-centric-basal-Coscinodiscophyceae	Coscinodiscus	Coscinodiscus_jonesianus	bASV17219	Bacteria	Gammaproteobacteria	Betaproteobacteriales	Methylophilaceae	OM43 clade	Unassigned OM43 clade (Genus)	0.113023	Pos	Prokaryote-Protist
ASV2723	Eukaryota	Bacillariophyta	Bacillariophyta_X	Radial-centric-basal-Coscinodiscophyceae	Coscinodiscus	Coscinodiscus_jonesianus	bASV9823	Bacteria	Acidimicrobiia	Actinomarinales	Actinomarinaceae	Candidatus Actinomarina	Unassigned Candidatus Actinomarina (Genus)	-0.0111978	Neg	Prokaryote-Protist
ASV2772	Eukaryota	Bacillariophyta	Bacillariophyta_X	Polar-centric-Mediophyceae	Cyclotella	Unassigned Cyclotella (Genus)	bASV6279	Bacteria	Bacteroidia	Flavobacteriales	Flavobacteriaceae	NS5 marine group	uncultured Flavobacterium sp.	0.0112751	Pos	Prokaryote-Protist
ASV2846	Eukaryota	Bacillariophyta	Bacillariophyta_X	Polar-centric-Mediophyceae	Thalassiosira	Unassigned Thalassiosira (Genus)	bASV755	Bacteria	Alphaproteobacteria	SAR11 clade	Clade III	alpha proteobacterium HIMB114	alpha proteobacterium HIMB114	-0.200148	Neg	Prokaryote-Protist
ASV2846	Eukaryota	Bacillariophyta	Bacillariophyta_X	Polar-centric-Mediophyceae	Thalassiosira	Unassigned Thalassiosira (Genus)	bASV6280	Bacteria	Bacteroidia	Flavobacteriales	Flavobacteriaceae	NS5 marine group	uncultured Flavobacterium sp.	-0.0236918	Neg	Prokaryote-Protist
ASV2858	Eukaryota	Bacillariophyta	Bacillariophyta_X	Polar-centric-Mediophyceae	Unassigned Polar-centric-Mediophyceae (Family)	Unassigned Polar-centric-Mediophyceae (Family)	bASV11960	Bacteria	Alphaproteobacteria	Parvibaculales	Parvibaculaceae	uncultured	uncultured alpha proteobacterium	-0.0957796	Neg	Prokaryote-Protist
ASV2858	Eukaryota	Bacillariophyta	Bacillariophyta_X	Polar-centric-Mediophyceae	Unassigned Polar-centric-Mediophyceae (Family)	Unassigned Polar-centric-Mediophyceae (Family)	bASV3390	Archaea	Nitrososphaeria	Nitrosopumilales	Nitrosopumilaceae	Candidatus Nitrosopumilus	Unassigned Candidatus Nitrosopumilus (Genus)	-0.0189894	Neg	Prokaryote-Protist
ASV2880	Eukaryota	Bacillariophyta	Bacillariophyta_X	Polar-centric-Mediophyceae	Thalassiosira	Unassigned Thalassiosira (Genus)	bASV16042	Bacteria	Gammaproteobacteria	UBA10353 marine group	Unassigned UBA10353 marine group (Order)	Unassigned UBA10353 marine group (Order)	Unassigned UBA10353 marine group (Order)	0.0227052	Pos	Prokaryote-Protist
ASV2896	Eukaryota	Bacillariophyta	Bacillariophyta_X	Polar-centric-Mediophyceae	Thalassiosira	Thalassiosira_hendeyi	bASV17244	Bacteria	Gammaproteobacteria	Betaproteobacteriales	Methylophilaceae	OM43 clade	Unassigned OM43 clade (Genus)	-0.0282233	Neg	Prokaryote-Protist
ASV2896	Eukaryota	Bacillariophyta	Bacillariophyta_X	Polar-centric-Mediophyceae	Thalassiosira	Thalassiosira_hendeyi	bASV2756	Bacteria	Oxyphotobacteria	Synechococcales	Cyanobiaceae	Cyanobium PCC-6307	uncultured cyanobacterium	-0.0836469	Neg	Prokaryote-Protist
ASV2897	Eukaryota	Bacillariophyta	Bacillariophyta_X	Polar-centric-Mediophyceae	Thalassiosira	Thalassiosira_hendeyi	bASV17134	Bacteria	Gammaproteobacteria	Betaproteobacteriales	Nitrosomonadaceae	IS-44	uncultured beta proteobacterium	0.0146405	Pos	Prokaryote-Protist
ASV2915	Eukaryota	Bacillariophyta	Bacillariophyta_X	Polar-centric-Mediophyceae	Skeletonema	Unassigned Skeletonema (Genus)	bASV3390	Archaea	Nitrososphaeria	Nitrosopumilales	Nitrosopumilaceae	Candidatus Nitrosopumilus	Unassigned Candidatus Nitrosopumilus (Genus)	0.188025	Pos	Prokaryote-Protist
ASV2932	Eukaryota	Bacillariophyta	Bacillariophyta_X	Polar-centric-Mediophyceae	Skeletonema	Unassigned Skeletonema (Genus)	bASV6279	Bacteria	Bacteroidia	Flavobacteriales	Flavobacteriaceae	NS5 marine group	uncultured Flavobacterium sp.	-0.00169587	Neg	Prokaryote-Protist
ASV3670	Eukaryota	Bicoecea	Bicoecales	Bicoecaceae	Bicosoeca	Unassigned Bicosoeca (Genus)	bASV9580	Bacteria	Acidimicrobiia	Microtrichales	Ilumatobacteraceae	uncultured	uncultured marine bacterium	-0.0323866	Neg	Prokaryote-Protist
ASV4093	Eukaryota	Picozoa_X	Picozoa_XX	Picozoa_XXX	Picozoa_XXXX	Picozoa_XXXX_sp.	bASV15716	Bacteria	Gammaproteobacteria	Thiomicrospirales	Thioglobaceae	SUP05 cluster	uncultured bacterium	0.00752706	Pos	Prokaryote-Protist
ASV4093	Eukaryota	Picozoa_X	Picozoa_XX	Picozoa_XXX	Picozoa_XXXX	Picozoa_XXXX_sp.	bASV9820	Bacteria	Acidimicrobiia	Actinomarinales	Actinomarinaceae	Candidatus Actinomarina	Unassigned Candidatus Actinomarina (Genus)	0.00548111	Pos	Prokaryote-Protist
ASV4667	Eukaryota	Acantharea	Acantharea_X	Acantharea_XX	Acantharea_XXX	Acantharea_XXX_sp.	bASV15532	Bacteria	Gammaproteobacteria	Oceanospirillales	Litoricolaceae	Litoricola	uncultured bacterium	0.0109705	Pos	Prokaryote-Protist
ASV4667	Eukaryota	Acantharea	Acantharea_X	Acantharea_XX	Acantharea_XXX	Acantharea_XXX_sp.	bASV6192	Bacteria	Bacteroidia	Flavobacteriales	Flavobacteriaceae	NS5 marine group	uncultured Flavobacterium sp.	-0.0288682	Neg	Prokaryote-Protist
ASV6398	Eukaryota	Katablepharidaceae	Katablepharidales	Katablepharidales_X	Leucocryptos	Leucocryptos_marina	bASV9823	Bacteria	Acidimicrobiia	Actinomarinales	Actinomarinaceae	Candidatus Actinomarina	Unassigned Candidatus Actinomarina (Genus)	0.043163	Pos	Prokaryote-Protist
ASV6405	Eukaryota	Katablepharidaceae	Katablepharidales	Katablepharidales_X	Katablepharis	Katablepharis_japonica	bASV12442	Bacteria	Alphaproteobacteria	Puniceispirillales	uncultured	Unassigned uncultured (Family)	Unassigned uncultured (Family)	-0.0438338	Neg	Prokaryote-Protist
ASV6405	Eukaryota	Katablepharidaceae	Katablepharidales	Katablepharidales_X	Katablepharis	Katablepharis_japonica	bASV17131	Bacteria	Gammaproteobacteria	Betaproteobacteriales	Nitrosomonadaceae	IS-44	uncultured beta proteobacterium	-0.0806192	Neg	Prokaryote-Protist
ASV6438	Eukaryota	Cryptophyceae	Cryptomonadales	Cryptomonadales_X	Unassigned Cryptomonadales_X (Family)	Unassigned Cryptomonadales_X (Family)	bASV8100	Bacteria	Pla3 lineage	unidentified marine bacterioplankton	unidentified marine bacterioplankton	unidentified marine bacterioplankton	unidentified marine bacterioplankton	-0.0861244	Neg	Prokaryote-Protist
ASV6518	Eukaryota	Cryptophyceae	Cryptomonadales	Cryptomonadales_X	Teleaulax	Unassigned Teleaulax (Genus)	bASV6205	Bacteria	Bacteroidia	Flavobacteriales	Flavobacteriaceae	NS5 marine group	uncultured Flavobacterium sp.	-0.0396379	Neg	Prokaryote-Protist
ASV6766	Eukaryota	Unassigned Fungi (Division)	Unassigned Fungi (Division)	Unassigned Fungi (Division)	Unassigned Fungi (Division)	Unassigned Fungi (Division)	bASV11705	Bacteria	Alphaproteobacteria	Rhodobacterales	Rhodobacteraceae	HIMB11	Unassigned HIMB11 (Genus)	0.279951	Pos	Prokaryote-Protist
ASV6926	Eukaryota	Pyramimonadales	Pyramimonadales_X	Pyramimonadales_XX	Unassigned Pyramimonadales_XX (Family)	Unassigned Pyramimonadales_XX (Family)	bASV3420	Archaea	Nitrososphaeria	Nitrosopumilales	Nitrosopumilaceae	Candidatus Nitrosopumilus	Unassigned Candidatus Nitrosopumilus (Genus)	-0.0740421	Neg	Prokaryote-Protist
ASV7007	Eukaryota	Mamiellophyceae	Mamiellales	Bathycoccaceae	Ostreococcus	Ostreococcus_tauri	bASV17233	Bacteria	Gammaproteobacteria	Betaproteobacteriales	Methylophilaceae	OM43 clade	Unassigned OM43 clade (Genus)	-0.0155849	Neg	Prokaryote-Protist
ASV7007	Eukaryota	Mamiellophyceae	Mamiellales	Bathycoccaceae	Ostreococcus	Ostreococcus_tauri	bASV549	Bacteria	Alphaproteobacteria	SAR11 clade	Clade II	Unassigned Clade II (Family)	Unassigned Clade II (Family)	-0.0259522	Neg	Prokaryote-Protist
ASV7010	Eukaryota	Mamiellophyceae	Mamiellales	Bathycoccaceae	Ostreococcus	Unassigned Ostreococcus (Genus)	bASV15716	Bacteria	Gammaproteobacteria	Thiomicrospirales	Thioglobaceae	SUP05 cluster	uncultured bacterium	0.0206731	Pos	Prokaryote-Protist
ASV7011	Eukaryota	Mamiellophyceae	Mamiellales	Bathycoccaceae	Ostreococcus	Ostreococcus_clade_B	bASV11467	Bacteria	Alphaproteobacteria	Rhodospirillales	AEGEAN-169 marine group	Unassigned AEGEAN-169 marine group (Family)	Unassigned AEGEAN-169 marine group (Family)	-0.0568892	Neg	Prokaryote-Protist
ASV7011	Eukaryota	Mamiellophyceae	Mamiellales	Bathycoccaceae	Ostreococcus	Ostreococcus_clade_B	bASV8507	Bacteria	Deltaproteobacteria	SAR324 clade(Marine group B)	uncultured bacterium HF0010_10I05	uncultured bacterium HF0010_10I05	uncultured bacterium HF0010_10I05	-0.0621523	Neg	Prokaryote-Protist
ASV7181	Eukaryota	Unassigned Fungi (Division)	Unassigned Fungi (Division)	Unassigned Fungi (Division)	Unassigned Fungi (Division)	Unassigned Fungi (Division)	bASV16042	Bacteria	Gammaproteobacteria	UBA10353 marine group	Unassigned UBA10353 marine group (Order)	Unassigned UBA10353 marine group (Order)	Unassigned UBA10353 marine group (Order)	-0.00718212	Neg	Prokaryote-Protist
ASV7596	Eukaryota	CONThreeP	CONThreeP_X	CONThreeP_XX	Askenasia	Askenasia_sp.	bASV6282	Bacteria	Bacteroidia	Flavobacteriales	Flavobacteriaceae	NS5 marine group	uncultured Flavobacterium sp.	-0.0111043	Neg	Prokaryote-Protist
ASV7635	Eukaryota	Phyllopharyngea	Cyrtophoria_1	PHYLL_4	PHYLL_4_X	PHYLL_4_X_sp.	bASV3390	Archaea	Nitrososphaeria	Nitrosopumilales	Nitrosopumilaceae	Candidatus Nitrosopumilus	Unassigned Candidatus Nitrosopumilus (Genus)	0.0673172	Pos	Prokaryote-Protist
ASV7635	Eukaryota	Phyllopharyngea	Cyrtophoria_1	PHYLL_4	PHYLL_4_X	PHYLL_4_X_sp.	bASV17731	Bacteria	Gammaproteobacteria	Cellvibrionales	Halieaceae	OM60(NOR5) clade	Unassigned OM60(NOR5) clade (Genus)	0.138752	Pos	Prokaryote-Protist
ASV7744	Eukaryota	Spirotrichea	Strombidiida	Strombidiidae	Spirostrombidium	Spirostrombidium_agathae	bASV655	Bacteria	Alphaproteobacteria	SAR11 clade	Clade I	Clade Ia	Unassigned Clade Ia (Genus)	-0.129012	Neg	Prokaryote-Protist
ASV7770	Eukaryota	Spirotrichea	Strombidiida	Strombidiidae_M	Strombidium_M	Strombidium_M_sp.	bASV16042	Bacteria	Gammaproteobacteria	UBA10353 marine group	Unassigned UBA10353 marine group (Order)	Unassigned UBA10353 marine group (Order)	Unassigned UBA10353 marine group (Order)	0.0579381	Pos	Prokaryote-Protist
ASV7770	Eukaryota	Spirotrichea	Strombidiida	Strombidiidae_M	Strombidium_M	Strombidium_M_sp.	bASV15935	Bacteria	Gammaproteobacteria	Thiotrichales	Thiotrichaceae	uncultured	uncultured bacterium JM9_B4	0.0344366	Pos	Prokaryote-Protist
ASV7770	Eukaryota	Spirotrichea	Strombidiida	Strombidiidae_M	Strombidium_M	Strombidium_M_sp.	bASV749	Bacteria	Alphaproteobacteria	SAR11 clade	Clade III	alpha proteobacterium HIMB114	alpha proteobacterium HIMB114	0.0238006	Pos	Prokaryote-Protist
ASV7814	Eukaryota	Spirotrichea	Strombidiida	Strombidiidae	Spirostrombidium	Spirostrombidium_agathae	bASV585	Bacteria	Alphaproteobacteria	SAR11 clade	Clade II	Unassigned Clade II (Family)	Unassigned Clade II (Family)	-0.0204402	Neg	Prokaryote-Protist
ASV7814	Eukaryota	Spirotrichea	Strombidiida	Strombidiidae	Spirostrombidium	Spirostrombidium_agathae	bASV9839	Bacteria	Acidimicrobiia	Actinomarinales	Actinomarinaceae	Candidatus Actinomarina	uncultured actinobacterium	-0.00256461	Neg	Prokaryote-Protist
ASV7880	Eukaryota	Spirotrichea	Tintinnida	TIN_11	TIN_11_X	TIN_11_X_sp.	bASV9873	Bacteria	Acidimicrobiia	Actinomarinales	Actinomarinaceae	Candidatus Actinomarina	Unassigned Candidatus Actinomarina (Genus)	-0.0183595	Neg	Prokaryote-Protist
ASV8035	Eukaryota	Spirotrichea	Tintinnida	Tintinnidiidae	Tintinnidium	Tintinnidium_fluviatile	bASV6477	Bacteria	Bacteroidia	Flavobacteriales	Flavobacteriaceae	NS5 marine group	Unassigned NS5 marine group (Genus)	-0.0173621	Neg	Prokaryote-Protist
ASV8035	Eukaryota	Spirotrichea	Tintinnida	Tintinnidiidae	Tintinnidium	Tintinnidium_fluviatile	bASV3403	Archaea	Nitrososphaeria	Nitrosopumilales	Nitrosopumilaceae	Candidatus Nitrosopumilus	Unassigned Candidatus Nitrosopumilus (Genus)	0.00642786	Pos	Prokaryote-Protist
ASV8051	Eukaryota	Spirotrichea	Tintinnida	Tintinnidiidae	Tintinnidium	Tintinnidium_sp.	bASV17242	Bacteria	Gammaproteobacteria	Betaproteobacteriales	Methylophilaceae	OM43 clade	Unassigned OM43 clade (Genus)	-0.0877521	Neg	Prokaryote-Protist
ASV8081	Eukaryota	Spirotrichea	Tintinnida	Unassigned Tintinnida (Order)	Unassigned Tintinnida (Order)	Unassigned Tintinnida (Order)	bASV11706	Bacteria	Alphaproteobacteria	Rhodobacterales	Rhodobacteraceae	HIMB11	Unassigned HIMB11 (Genus)	-4.03614e-05	Neg	Prokaryote-Protist
ASV8128	Eukaryota	Spirotrichea	Choreotrichida	Strobilidiidae_I	Pelagostrobilidium	Pelagostrobilidium_sp.	bASV10806	Bacteria	Alphaproteobacteria	Puniceispirillales	SAR116 clade	Unassigned SAR116 clade (Family)	Unassigned SAR116 clade (Family)	-0.154023	Neg	Prokaryote-Protist
ASV8142	Eukaryota	Spirotrichea	Tintinnida	TIN_11	TIN_11_X	TIN_11_X_sp.	bASV16722	Bacteria	Gammaproteobacteria	SAR86 clade	uncultured gamma proteobacterium	uncultured gamma proteobacterium	uncultured gamma proteobacterium	-0.106833	Neg	Prokaryote-Protist
ASV8149	Eukaryota	Spirotrichea	Unassigned Spirotrichea (Class)	Unassigned Spirotrichea (Class)	Unassigned Spirotrichea (Class)	Unassigned Spirotrichea (Class)	bASV658	Bacteria	Alphaproteobacteria	SAR11 clade	Clade I	Clade Ia	Unassigned Clade Ia (Genus)	-0.0167128	Neg	Prokaryote-Protist
ASV8149	Eukaryota	Spirotrichea	Unassigned Spirotrichea (Class)	Unassigned Spirotrichea (Class)	Unassigned Spirotrichea (Class)	Unassigned Spirotrichea (Class)	bASV5906	Bacteria	Bacteroidia	Flavobacteriales	Cryomorphaceae	uncultured	Unassigned uncultured (Genus)	0.0360954	Pos	Prokaryote-Protist
ASV8158	Eukaryota	Spirotrichea	Choreotrichida	Choreotrichida_X	Choreotrichida_XX	Choreotrichida_XX_sp.	bASV6280	Bacteria	Bacteroidia	Flavobacteriales	Flavobacteriaceae	NS5 marine group	uncultured Flavobacterium sp.	0.0637418	Pos	Prokaryote-Protist
ASV8375	Eukaryota	Syndiniales	Dino-Group-I	Dino-Group-I-Clade-1	Dino-Group-I-Clade-1_X	Dino-Group-I-Clade-1_X_sp.	bASV17134	Bacteria	Gammaproteobacteria	Betaproteobacteriales	Nitrosomonadaceae	IS-44	uncultured beta proteobacterium	-0.000490409	Neg	Prokaryote-Protist
ASV8413	Eukaryota	Syndiniales	Dino-Group-II	Unassigned Dino-Group-II (Order)	Unassigned Dino-Group-II (Order)	Unassigned Dino-Group-II (Order)	bASV17082	Bacteria	Gammaproteobacteria	Betaproteobacteriales	Nitrosomonadaceae	Unassigned Nitrosomonadaceae (Family)	Unassigned Nitrosomonadaceae (Family)	-0.0220435	Neg	Prokaryote-Protist
ASV842	Eukaryota	Filosa-Thecofilosea	Cryomonadida	Protaspa-lineage	Protaspa-lineage_X	Protaspa-lineage_X_sp.	bASV9852	Bacteria	Acidimicrobiia	Actinomarinales	Actinomarinaceae	Candidatus Actinomarina	uncultured actinobacterium	-0.0521318	Neg	Prokaryote-Protist
ASV8461	Eukaryota	Syndiniales	Dino-Group-II	Dino-Group-II-Clade-12	Dino-Group-II-Clade-12_X	Dino-Group-II-Clade-12_X_sp.	bASV585	Bacteria	Alphaproteobacteria	SAR11 clade	Clade II	Unassigned Clade II (Family)	Unassigned Clade II (Family)	0.115407	Pos	Prokaryote-Protist
ASV8496	Eukaryota	Syndiniales	Dino-Group-II	Dino-Group-II-Clade-1	Dino-Group-II-Clade-1_X	Dino-Group-II-Clade-1_X_sp.	bASV642	Bacteria	Alphaproteobacteria	SAR11 clade	Clade I	Clade Ia	Unassigned Clade Ia (Genus)	0.0452805	Pos	Prokaryote-Protist
ASV8511	Eukaryota	Syndiniales	Dino-Group-II	Dino-Group-II-Clade-1	Dino-Group-II-Clade-1_X	Dino-Group-II-Clade-1_X_sp.	bASV17232	Bacteria	Gammaproteobacteria	Betaproteobacteriales	Methylophilaceae	OM43 clade	Unassigned OM43 clade (Genus)	0.0858564	Pos	Prokaryote-Protist
ASV8511	Eukaryota	Syndiniales	Dino-Group-II	Dino-Group-II-Clade-1	Dino-Group-II-Clade-1_X	Dino-Group-II-Clade-1_X_sp.	bASV9681	Bacteria	Actinobacteria	Micrococcales	Microbacteriaceae	Candidatus Aquiluna	uncultured bacterium	0.0214636	Pos	Prokaryote-Protist
ASV8786	Eukaryota	Syndiniales	Dino-Group-II	Dino-Group-II-Clade-1	Dino-Group-II-Clade-1_X	Dino-Group-II-Clade-1_X_sp.	bASV12447	Bacteria	Alphaproteobacteria	Puniceispirillales	uncultured	Unassigned uncultured (Family)	Unassigned uncultured (Family)	0.0358279	Pos	Prokaryote-Protist
ASV8874	Eukaryota	Syndiniales	Dino-Group-II	Dino-Group-II-Clade-30	Dino-Group-II-Clade-30_X	Dino-Group-II-Clade-30_X_sp.	bASV8499	Bacteria	Deltaproteobacteria	SAR324 clade(Marine group B)	uncultured bacterium HF0010_10I05	uncultured bacterium HF0010_10I05	uncultured bacterium HF0010_10I05	-0.102749	Neg	Prokaryote-Protist
ASV8965	Eukaryota	Syndiniales	Dino-Group-II	Dino-Group-II-Clade-6	Dino-Group-II-Clade-6_X	Dino-Group-II-Clade-6_X_sp.	bASV549	Bacteria	Alphaproteobacteria	SAR11 clade	Clade II	Unassigned Clade II (Family)	Unassigned Clade II (Family)	0.0618955	Pos	Prokaryote-Protist
ASV9028	Eukaryota	Syndiniales	Dino-Group-I	Dino-Group-I-Clade-4	Dino-Group-I-Clade-4_X	Dino-Group-I-Clade-4_X_sp.	bASV16774	Bacteria	Gammaproteobacteria	SAR86 clade	Unassigned SAR86 clade (Order)	Unassigned SAR86 clade (Order)	Unassigned SAR86 clade (Order)	0.0766204	Pos	Prokaryote-Protist
ASV9074	Eukaryota	Syndiniales	Dino-Group-I	Dino-Group-I-Clade-4	Dino-Group-I-Clade-4_X	Dino-Group-I-Clade-4_X_sp.	bASV17739	Bacteria	Gammaproteobacteria	Cellvibrionales	Halieaceae	OM60(NOR5) clade	Unassigned OM60(NOR5) clade (Genus)	-0.0747073	Neg	Prokaryote-Protist
ASV9074	Eukaryota	Syndiniales	Dino-Group-I	Dino-Group-I-Clade-4	Dino-Group-I-Clade-4_X	Dino-Group-I-Clade-4_X_sp.	bASV679	Bacteria	Alphaproteobacteria	SAR11 clade	Clade I	Clade Ia	Unassigned Clade Ia (Genus)	-0.0846524	Neg	Prokaryote-Protist
ASV9082	Eukaryota	Syndiniales	Dino-Group-I	Dino-Group-I-Clade-4	Dino-Group-I-Clade-4_X	Dino-Group-I-Clade-4_X_sp.	bASV15716	Bacteria	Gammaproteobacteria	Thiomicrospirales	Thioglobaceae	SUP05 cluster	uncultured bacterium	0.00307476	Pos	Prokaryote-Protist
ASV9116	Eukaryota	Syndiniales	Dino-Group-I	Dino-Group-I-Clade-5	Dino-Group-I-Clade-5_X	Dino-Group-I-Clade-5_X_sp.	bASV11461	Bacteria	Alphaproteobacteria	Rhodospirillales	AEGEAN-169 marine group	Unassigned AEGEAN-169 marine group (Family)	Unassigned AEGEAN-169 marine group (Family)	0.0906125	Pos	Prokaryote-Protist
ASV9116	Eukaryota	Syndiniales	Dino-Group-I	Dino-Group-I-Clade-5	Dino-Group-I-Clade-5_X	Dino-Group-I-Clade-5_X_sp.	bASV6279	Bacteria	Bacteroidia	Flavobacteriales	Flavobacteriaceae	NS5 marine group	uncultured Flavobacterium sp.	0.276191	Pos	Prokaryote-Protist
ASV9128	Eukaryota	Dinophyceae	Dinophyceae_X	Oodiniaceae	Oodinium	Oodinium_pouchetii	bASV15935	Bacteria	Gammaproteobacteria	Thiotrichales	Thiotrichaceae	uncultured	uncultured bacterium JM9_B4	0.252439	Pos	Prokaryote-Protist
ASV9129	Eukaryota	Dinophyceae	Dinophyceae_X	Oodiniaceae	Oodinium	Oodinium_pouchetii	bASV10282	Bacteria	Verrucomicrobiae	Opitutales	Puniceicoccaceae	MB11C04 marine group	uncultured marine bacterium	0.0168515	Pos	Prokaryote-Protist
ASV9132	Eukaryota	Dinophyceae	Dinophyceae_X	Oodiniaceae	Oodinium	Oodinium_pouchetii	bASV10282	Bacteria	Verrucomicrobiae	Opitutales	Puniceicoccaceae	MB11C04 marine group	uncultured marine bacterium	0.042598	Pos	Prokaryote-Protist
ASV9132	Eukaryota	Dinophyceae	Dinophyceae_X	Oodiniaceae	Oodinium	Oodinium_pouchetii	bASV9820	Bacteria	Acidimicrobiia	Actinomarinales	Actinomarinaceae	Candidatus Actinomarina	Unassigned Candidatus Actinomarina (Genus)	0.00281549	Pos	Prokaryote-Protist
ASV9199	Eukaryota	Dinophyceae	Gonyaulacales	Goniodomataceae	Alexandrium	Alexandrium_leei	bASV16715	Bacteria	Gammaproteobacteria	SAR86 clade	uncultured gamma proteobacterium	uncultured gamma proteobacterium	uncultured gamma proteobacterium	0.0320031	Pos	Prokaryote-Protist
ASV9247	Eukaryota	Eukaryota_XXX	Eukaryota_XXXX	Eukaryota_XXXXX	Eukaryota_XXXXXX	Eukaryota_XXXXXX_sp.	bASV539	Bacteria	Alphaproteobacteria	SAR11 clade	Clade II	Unassigned Clade II (Family)	Unassigned Clade II (Family)	0.0507885	Pos	Prokaryote-Protist
ASV9325	Eukaryota	Dinophyceae	Gonyaulacales	Gonyaulacaceae	Gonyaulax	Unassigned Gonyaulax (Genus)	bASV576	Bacteria	Alphaproteobacteria	SAR11 clade	Clade II	Unassigned Clade II (Family)	Unassigned Clade II (Family)	0.0768107	Pos	Prokaryote-Protist
ASV9325	Eukaryota	Dinophyceae	Gonyaulacales	Gonyaulacaceae	Gonyaulax	Unassigned Gonyaulax (Genus)	bASV17233	Bacteria	Gammaproteobacteria	Betaproteobacteriales	Methylophilaceae	OM43 clade	Unassigned OM43 clade (Genus)	0.119634	Pos	Prokaryote-Protist
ASV9423	Eukaryota	Dinophyceae	Unassigned Dinophyceae (Class)	Unassigned Dinophyceae (Class)	Unassigned Dinophyceae (Class)	Unassigned Dinophyceae (Class)	bASV6279	Bacteria	Bacteroidia	Flavobacteriales	Flavobacteriaceae	NS5 marine group	uncultured Flavobacterium sp.	-0.0224622	Neg	Prokaryote-Protist
ASV9423	Eukaryota	Dinophyceae	Unassigned Dinophyceae (Class)	Unassigned Dinophyceae (Class)	Unassigned Dinophyceae (Class)	Unassigned Dinophyceae (Class)	bASV5899	Bacteria	Bacteroidia	Flavobacteriales	Cryomorphaceae	uncultured	Unassigned uncultured (Genus)	-0.0655646	Neg	Prokaryote-Protist
ASV9423	Eukaryota	Dinophyceae	Unassigned Dinophyceae (Class)	Unassigned Dinophyceae (Class)	Unassigned Dinophyceae (Class)	Unassigned Dinophyceae (Class)	bASV585	Bacteria	Alphaproteobacteria	SAR11 clade	Clade II	Unassigned Clade II (Family)	Unassigned Clade II (Family)	0.0510485	Pos	Prokaryote-Protist
ASV9427	Eukaryota	Dinophyceae	Gymnodiniales	Gymnodiniaceae	Gyrodinium	Gyrodinium_dominans	bASV9873	Bacteria	Acidimicrobiia	Actinomarinales	Actinomarinaceae	Candidatus Actinomarina	Unassigned Candidatus Actinomarina (Genus)	-0.123499	Neg	Prokaryote-Protist
ASV9427	Eukaryota	Dinophyceae	Gymnodiniales	Gymnodiniaceae	Gyrodinium	Gyrodinium_dominans	bASV9862	Bacteria	Acidimicrobiia	Actinomarinales	Actinomarinaceae	Candidatus Actinomarina	Unassigned Candidatus Actinomarina (Genus)	-0.00531954	Neg	Prokaryote-Protist
ASV9487	Eukaryota	Dinophyceae	Unassigned Dinophyceae (Class)	Unassigned Dinophyceae (Class)	Unassigned Dinophyceae (Class)	Unassigned Dinophyceae (Class)	bASV2747	Bacteria	Oxyphotobacteria	Synechococcales	Cyanobiaceae	Cyanobium PCC-6307	uncultured cyanobacterium	-0.0318361	Neg	Prokaryote-Protist
ASV9487	Eukaryota	Dinophyceae	Unassigned Dinophyceae (Class)	Unassigned Dinophyceae (Class)	Unassigned Dinophyceae (Class)	Unassigned Dinophyceae (Class)	bASV3419	Archaea	Nitrososphaeria	Nitrosopumilales	Nitrosopumilaceae	Candidatus Nitrosopumilus	Unassigned Candidatus Nitrosopumilus (Genus)	-0.0627949	Neg	Prokaryote-Protist
ASV9529	Eukaryota	Dinophyceae	Unassigned Dinophyceae (Class)	Unassigned Dinophyceae (Class)	Unassigned Dinophyceae (Class)	Unassigned Dinophyceae (Class)	bASV645	Bacteria	Alphaproteobacteria	SAR11 clade	Clade I	Clade Ia	Unassigned Clade Ia (Genus)	-0.0550763	Neg	Prokaryote-Protist
ASV9531	Eukaryota	Dinophyceae	Gymnodiniales	Gymnodiniaceae	Unassigned Gymnodiniaceae (Family)	Unassigned Gymnodiniaceae (Family)	bASV6201	Bacteria	Bacteroidia	Flavobacteriales	Flavobacteriaceae	NS5 marine group	uncultured Flavobacterium sp.	0.0105774	Pos	Prokaryote-Protist
ASV9572	Eukaryota	Dinophyceae	Unassigned Dinophyceae (Class)	Unassigned Dinophyceae (Class)	Unassigned Dinophyceae (Class)	Unassigned Dinophyceae (Class)	bASV9829	Bacteria	Acidimicrobiia	Actinomarinales	Actinomarinaceae	Candidatus Actinomarina	Unassigned Candidatus Actinomarina (Genus)	0.050782	Pos	Prokaryote-Protist
ASV9575	Eukaryota	Dinophyceae	Unassigned Dinophyceae (Class)	Unassigned Dinophyceae (Class)	Unassigned Dinophyceae (Class)	Unassigned Dinophyceae (Class)	bASV3419	Archaea	Nitrososphaeria	Nitrosopumilales	Nitrosopumilaceae	Candidatus Nitrosopumilus	Unassigned Candidatus Nitrosopumilus (Genus)	0.0917655	Pos	Prokaryote-Protist
ASV9575	Eukaryota	Dinophyceae	Unassigned Dinophyceae (Class)	Unassigned Dinophyceae (Class)	Unassigned Dinophyceae (Class)	Unassigned Dinophyceae (Class)	bASV752	Bacteria	Alphaproteobacteria	SAR11 clade	Clade III	alpha proteobacterium HIMB114	alpha proteobacterium HIMB114	0.0883241	Pos	Prokaryote-Protist
ASV9623	Eukaryota	Dinophyceae	Gymnodiniales	Gymnodiniaceae	Gymnodinium	Gymnodinium_sp.	bASV10282	Bacteria	Verrucomicrobiae	Opitutales	Puniceicoccaceae	MB11C04 marine group	uncultured marine bacterium	-0.0627296	Neg	Prokaryote-Protist
ASV9641	Eukaryota	Dinophyceae	Unassigned Dinophyceae (Class)	Unassigned Dinophyceae (Class)	Unassigned Dinophyceae (Class)	Unassigned Dinophyceae (Class)	bASV17731	Bacteria	Gammaproteobacteria	Cellvibrionales	Halieaceae	OM60(NOR5) clade	Unassigned OM60(NOR5) clade (Genus)	0.364931	Pos	Prokaryote-Protist
ASV9641	Eukaryota	Dinophyceae	Unassigned Dinophyceae (Class)	Unassigned Dinophyceae (Class)	Unassigned Dinophyceae (Class)	Unassigned Dinophyceae (Class)	bASV9822	Bacteria	Acidimicrobiia	Actinomarinales	Actinomarinaceae	Candidatus Actinomarina	Unassigned Candidatus Actinomarina (Genus)	0.112717	Pos	Prokaryote-Protist
ASV9773	Eukaryota	Dinophyceae	Peridiniales	Unassigned Peridiniales (Order)	Unassigned Peridiniales (Order)	Unassigned Peridiniales (Order)	bASV3403	Archaea	Nitrososphaeria	Nitrosopumilales	Nitrosopumilaceae	Candidatus Nitrosopumilus	Unassigned Candidatus Nitrosopumilus (Genus)	0.0131497	Pos	Prokaryote-Protist
ASV9777	Eukaryota	Dinophyceae	Unassigned Dinophyceae (Class)	Unassigned Dinophyceae (Class)	Unassigned Dinophyceae (Class)	Unassigned Dinophyceae (Class)	bASV8348	Bacteria	Planctomycetacia	Planctomycetales	Rubinisphaeraceae	uncultured	uncultured Planctomycetia bacterium	-0.0439573	Neg	Prokaryote-Protist
ASV9927	Eukaryota	Dinophyceae	Peridiniales	Thoracosphaeraceae	Pentapharsodinium	Pentapharsodinium_sp.	bASV9582	Bacteria	Acidimicrobiia	Microtrichales	Ilumatobacteraceae	uncultured	uncultured marine bacterium	-0.0305061	Neg	Prokaryote-Protist
ASV10027	Eukaryota	Dinophyceae	Unassigned Dinophyceae (Class)	Unassigned Dinophyceae (Class)	Unassigned Dinophyceae (Class)	Unassigned Dinophyceae (Class)	ASV9400	Eukaryota	Syndiniales	Dino-Group-III	Dino-Group-III_X	Dino-Group-III_XX	Dino-Group-III_XX_sp.	0.0633412	Pos	Protist-Protist
ASV10027	Eukaryota	Dinophyceae	Unassigned Dinophyceae (Class)	Unassigned Dinophyceae (Class)	Unassigned Dinophyceae (Class)	Unassigned Dinophyceae (Class)	ASV6997	Eukaryota	Mamiellophyceae	Mamiellales	Bathycoccaceae	Bathycoccus	Bathycoccus_prasinos	0.0180201	Pos	Protist-Protist
ASV10027	Eukaryota	Dinophyceae	Unassigned Dinophyceae (Class)	Unassigned Dinophyceae (Class)	Unassigned Dinophyceae (Class)	Unassigned Dinophyceae (Class)	ASV3670	Eukaryota	Bicoecea	Bicoecales	Bicoecaceae	Bicosoeca	Unassigned Bicosoeca (Genus)	0.0549973	Pos	Protist-Protist
ASV10027	Eukaryota	Dinophyceae	Unassigned Dinophyceae (Class)	Unassigned Dinophyceae (Class)	Unassigned Dinophyceae (Class)	Unassigned Dinophyceae (Class)	ASV2105	Eukaryota	Bacillariophyta	Bacillariophyta_X	Raphid-pennate	Seminavis	Seminavis_sp.	-0.022702	Neg	Protist-Protist
ASV10027	Eukaryota	Dinophyceae	Unassigned Dinophyceae (Class)	Unassigned Dinophyceae (Class)	Unassigned Dinophyceae (Class)	Unassigned Dinophyceae (Class)	ASV2931	Eukaryota	Bacillariophyta	Bacillariophyta_X	Polar-centric-Mediophyceae	Skeletonema	Unassigned Skeletonema (Genus)	-0.065846	Neg	Protist-Protist
ASV10027	Eukaryota	Dinophyceae	Unassigned Dinophyceae (Class)	Unassigned Dinophyceae (Class)	Unassigned Dinophyceae (Class)	Unassigned Dinophyceae (Class)	ASV6491	Eukaryota	Cryptophyceae	Cryptomonadales	Cryptomonadales_X	Hemiselmis	Hemiselmis_cryptochromatica	0.0796092	Pos	Protist-Protist
ASV10027	Eukaryota	Dinophyceae	Unassigned Dinophyceae (Class)	Unassigned Dinophyceae (Class)	Unassigned Dinophyceae (Class)	Unassigned Dinophyceae (Class)	ASV2011	Eukaryota	Bacillariophyta	Bacillariophyta_X	Raphid-pennate	Unassigned Raphid-pennate (Family)	Unassigned Raphid-pennate (Family)	-0.105349	Neg	Protist-Protist
ASV10030	Eukaryota	Dinophyceae	Unassigned Dinophyceae (Class)	Unassigned Dinophyceae (Class)	Unassigned Dinophyceae (Class)	Unassigned Dinophyceae (Class)	ASV2897	Eukaryota	Bacillariophyta	Bacillariophyta_X	Polar-centric-Mediophyceae	Thalassiosira	Thalassiosira_hendeyi	-0.0252773	Neg	Protist-Protist
ASV10030	Eukaryota	Dinophyceae	Unassigned Dinophyceae (Class)	Unassigned Dinophyceae (Class)	Unassigned Dinophyceae (Class)	Unassigned Dinophyceae (Class)	ASV9199	Eukaryota	Dinophyceae	Gonyaulacales	Goniodomataceae	Alexandrium	Alexandrium_leei	-0.0176696	Neg	Protist-Protist
ASV10030	Eukaryota	Dinophyceae	Unassigned Dinophyceae (Class)	Unassigned Dinophyceae (Class)	Unassigned Dinophyceae (Class)	Unassigned Dinophyceae (Class)	ASV9774	Eukaryota	Dinophyceae	Unassigned Dinophyceae (Class)	Unassigned Dinophyceae (Class)	Unassigned Dinophyceae (Class)	Unassigned Dinophyceae (Class)	-0.158368	Neg	Protist-Protist
ASV10030	Eukaryota	Dinophyceae	Unassigned Dinophyceae (Class)	Unassigned Dinophyceae (Class)	Unassigned Dinophyceae (Class)	Unassigned Dinophyceae (Class)	ASV9773	Eukaryota	Dinophyceae	Peridiniales	Unassigned Peridiniales (Order)	Unassigned Peridiniales (Order)	Unassigned Peridiniales (Order)	-0.065822	Neg	Protist-Protist
ASV10030	Eukaryota	Dinophyceae	Unassigned Dinophyceae (Class)	Unassigned Dinophyceae (Class)	Unassigned Dinophyceae (Class)	Unassigned Dinophyceae (Class)	ASV6766	Eukaryota	Unassigned Fungi (Division)	Unassigned Fungi (Division)	Unassigned Fungi (Division)	Unassigned Fungi (Division)	Unassigned Fungi (Division)	-0.241893	Neg	Protist-Protist
ASV10030	Eukaryota	Dinophyceae	Unassigned Dinophyceae (Class)	Unassigned Dinophyceae (Class)	Unassigned Dinophyceae (Class)	Unassigned Dinophyceae (Class)	ASV9487	Eukaryota	Dinophyceae	Unassigned Dinophyceae (Class)	Unassigned Dinophyceae (Class)	Unassigned Dinophyceae (Class)	Unassigned Dinophyceae (Class)	0.0355141	Pos	Protist-Protist
ASV10030	Eukaryota	Dinophyceae	Unassigned Dinophyceae (Class)	Unassigned Dinophyceae (Class)	Unassigned Dinophyceae (Class)	Unassigned Dinophyceae (Class)	ASV8081	Eukaryota	Spirotrichea	Tintinnida	Unassigned Tintinnida (Order)	Unassigned Tintinnida (Order)	Unassigned Tintinnida (Order)	-0.0089412	Neg	Protist-Protist
ASV10030	Eukaryota	Dinophyceae	Unassigned Dinophyceae (Class)	Unassigned Dinophyceae (Class)	Unassigned Dinophyceae (Class)	Unassigned Dinophyceae (Class)	ASV8051	Eukaryota	Spirotrichea	Tintinnida	Tintinnidiidae	Tintinnidium	Tintinnidium_sp.	0.00765635	Pos	Protist-Protist
ASV10034	Eukaryota	Dinophyceae	Peridiniales	Unassigned Peridiniales (Order)	Unassigned Peridiniales (Order)	Unassigned Peridiniales (Order)	ASV9933	Eukaryota	Dinophyceae	Peridiniales	Thoracosphaeraceae	Unassigned Thoracosphaeraceae (Family)	Unassigned Thoracosphaeraceae (Family)	-0.0367097	Neg	Protist-Protist
ASV10034	Eukaryota	Dinophyceae	Peridiniales	Unassigned Peridiniales (Order)	Unassigned Peridiniales (Order)	Unassigned Peridiniales (Order)	ASV7635	Eukaryota	Phyllopharyngea	Cyrtophoria_1	PHYLL_4	PHYLL_4_X	PHYLL_4_X_sp.	-0.0445813	Neg	Protist-Protist
ASV10034	Eukaryota	Dinophyceae	Peridiniales	Unassigned Peridiniales (Order)	Unassigned Peridiniales (Order)	Unassigned Peridiniales (Order)	ASV2932	Eukaryota	Bacillariophyta	Bacillariophyta_X	Polar-centric-Mediophyceae	Skeletonema	Unassigned Skeletonema (Genus)	0.0736752	Pos	Protist-Protist
ASV10034	Eukaryota	Dinophyceae	Peridiniales	Unassigned Peridiniales (Order)	Unassigned Peridiniales (Order)	Unassigned Peridiniales (Order)	ASV2140	Eukaryota	Bacillariophyta	Bacillariophyta_X	Raphid-pennate	Unassigned Raphid-pennate (Family)	Unassigned Raphid-pennate (Family)	-0.124284	Neg	Protist-Protist
ASV10034	Eukaryota	Dinophyceae	Peridiniales	Unassigned Peridiniales (Order)	Unassigned Peridiniales (Order)	Unassigned Peridiniales (Order)	ASV8955	Eukaryota	Syndiniales	Dino-Group-II	Dino-Group-II-Clade-6	Dino-Group-II-Clade-6_X	Dino-Group-II-Clade-6_X_sp.	-0.040774	Neg	Protist-Protist
ASV10034	Eukaryota	Dinophyceae	Peridiniales	Unassigned Peridiniales (Order)	Unassigned Peridiniales (Order)	Unassigned Peridiniales (Order)	ASV2081	Eukaryota	Bacillariophyta	Bacillariophyta_X	Raphid-pennate	Unassigned Raphid-pennate (Family)	Unassigned Raphid-pennate (Family)	0.234941	Pos	Protist-Protist
ASV10083	Eukaryota	Dinophyceae	Unassigned Dinophyceae (Class)	Unassigned Dinophyceae (Class)	Unassigned Dinophyceae (Class)	Unassigned Dinophyceae (Class)	ASV8874	Eukaryota	Syndiniales	Dino-Group-II	Dino-Group-II-Clade-30	Dino-Group-II-Clade-30_X	Dino-Group-II-Clade-30_X_sp.	0.223796	Pos	Protist-Protist
ASV10083	Eukaryota	Dinophyceae	Unassigned Dinophyceae (Class)	Unassigned Dinophyceae (Class)	Unassigned Dinophyceae (Class)	Unassigned Dinophyceae (Class)	ASV2734	Eukaryota	Bacillariophyta	Bacillariophyta_X	Radial-centric-basal-Coscinodiscophyceae	Guinardia	Guinardia_delicatula	-0.0108104	Neg	Protist-Protist
ASV10083	Eukaryota	Dinophyceae	Unassigned Dinophyceae (Class)	Unassigned Dinophyceae (Class)	Unassigned Dinophyceae (Class)	Unassigned Dinophyceae (Class)	ASV9570	Eukaryota	Dinophyceae	Unassigned Dinophyceae (Class)	Unassigned Dinophyceae (Class)	Unassigned Dinophyceae (Class)	Unassigned Dinophyceae (Class)	-0.0632562	Neg	Protist-Protist
ASV10083	Eukaryota	Dinophyceae	Unassigned Dinophyceae (Class)	Unassigned Dinophyceae (Class)	Unassigned Dinophyceae (Class)	Unassigned Dinophyceae (Class)	ASV7130	Eukaryota	Trebouxiophyceae	Chlorellales	Chlorellales_X	Picochlorum	Picochlorum_sp.	-0.00997501	Neg	Protist-Protist
ASV10087	Eukaryota	Dinophyceae	Unassigned Dinophyceae (Class)	Unassigned Dinophyceae (Class)	Unassigned Dinophyceae (Class)	Unassigned Dinophyceae (Class)	ASV2932	Eukaryota	Bacillariophyta	Bacillariophyta_X	Polar-centric-Mediophyceae	Skeletonema	Unassigned Skeletonema (Genus)	0.148158	Pos	Protist-Protist
ASV10087	Eukaryota	Dinophyceae	Unassigned Dinophyceae (Class)	Unassigned Dinophyceae (Class)	Unassigned Dinophyceae (Class)	Unassigned Dinophyceae (Class)	ASV7596	Eukaryota	CONThreeP	CONThreeP_X	CONThreeP_XX	Askenasia	Askenasia_sp.	-0.0119013	Neg	Protist-Protist
ASV10087	Eukaryota	Dinophyceae	Unassigned Dinophyceae (Class)	Unassigned Dinophyceae (Class)	Unassigned Dinophyceae (Class)	Unassigned Dinophyceae (Class)	ASV9423	Eukaryota	Dinophyceae	Unassigned Dinophyceae (Class)	Unassigned Dinophyceae (Class)	Unassigned Dinophyceae (Class)	Unassigned Dinophyceae (Class)	0.212827	Pos	Protist-Protist
ASV10087	Eukaryota	Dinophyceae	Unassigned Dinophyceae (Class)	Unassigned Dinophyceae (Class)	Unassigned Dinophyceae (Class)	Unassigned Dinophyceae (Class)	ASV7744	Eukaryota	Spirotrichea	Strombidiida	Strombidiidae	Spirostrombidium	Spirostrombidium_agathae	-0.0465296	Neg	Protist-Protist
ASV10087	Eukaryota	Dinophyceae	Unassigned Dinophyceae (Class)	Unassigned Dinophyceae (Class)	Unassigned Dinophyceae (Class)	Unassigned Dinophyceae (Class)	ASV9531	Eukaryota	Dinophyceae	Gymnodiniales	Gymnodiniaceae	Unassigned Gymnodiniaceae (Family)	Unassigned Gymnodiniaceae (Family)	-0.0103045	Neg	Protist-Protist
ASV10087	Eukaryota	Dinophyceae	Unassigned Dinophyceae (Class)	Unassigned Dinophyceae (Class)	Unassigned Dinophyceae (Class)	Unassigned Dinophyceae (Class)	ASV7181	Eukaryota	Unassigned Fungi (Division)	Unassigned Fungi (Division)	Unassigned Fungi (Division)	Unassigned Fungi (Division)	Unassigned Fungi (Division)	0.0301012	Pos	Protist-Protist
ASV10096	Eukaryota	Dinophyceae	Unassigned Dinophyceae (Class)	Unassigned Dinophyceae (Class)	Unassigned Dinophyceae (Class)	Unassigned Dinophyceae (Class)	ASV9082	Eukaryota	Syndiniales	Dino-Group-I	Dino-Group-I-Clade-4	Dino-Group-I-Clade-4_X	Dino-Group-I-Clade-4_X_sp.	-0.0309533	Neg	Protist-Protist
ASV10096	Eukaryota	Dinophyceae	Unassigned Dinophyceae (Class)	Unassigned Dinophyceae (Class)	Unassigned Dinophyceae (Class)	Unassigned Dinophyceae (Class)	ASV9570	Eukaryota	Dinophyceae	Unassigned Dinophyceae (Class)	Unassigned Dinophyceae (Class)	Unassigned Dinophyceae (Class)	Unassigned Dinophyceae (Class)	-0.0582928	Neg	Protist-Protist
ASV10096	Eukaryota	Dinophyceae	Unassigned Dinophyceae (Class)	Unassigned Dinophyceae (Class)	Unassigned Dinophyceae (Class)	Unassigned Dinophyceae (Class)	ASV3546	Eukaryota	MAST-6	MAST-6_X	MAST-6_XX	MAST-6_XXX	MAST-6_XXX_sp.	0.0628288	Pos	Protist-Protist
ASV10096	Eukaryota	Dinophyceae	Unassigned Dinophyceae (Class)	Unassigned Dinophyceae (Class)	Unassigned Dinophyceae (Class)	Unassigned Dinophyceae (Class)	ASV8874	Eukaryota	Syndiniales	Dino-Group-II	Dino-Group-II-Clade-30	Dino-Group-II-Clade-30_X	Dino-Group-II-Clade-30_X_sp.	0.0429758	Pos	Protist-Protist
ASV10096	Eukaryota	Dinophyceae	Unassigned Dinophyceae (Class)	Unassigned Dinophyceae (Class)	Unassigned Dinophyceae (Class)	Unassigned Dinophyceae (Class)	ASV8050	Eukaryota	Spirotrichea	Tintinnida	Tintinnidiidae	Tintinnidium	Unassigned Tintinnidium (Genus)	0.235025	Pos	Protist-Protist
ASV10096	Eukaryota	Dinophyceae	Unassigned Dinophyceae (Class)	Unassigned Dinophyceae (Class)	Unassigned Dinophyceae (Class)	Unassigned Dinophyceae (Class)	ASV8122	Eukaryota	Spirotrichea	Choreotrichida	Strobilidiidae_I	Pelagostrobilidium	Pelagostrobilidium_sp.	-0.0462456	Neg	Protist-Protist
ASV10096	Eukaryota	Dinophyceae	Unassigned Dinophyceae (Class)	Unassigned Dinophyceae (Class)	Unassigned Dinophyceae (Class)	Unassigned Dinophyceae (Class)	ASV7814	Eukaryota	Spirotrichea	Strombidiida	Strombidiidae	Spirostrombidium	Spirostrombidium_agathae	-0.0327127	Neg	Protist-Protist
ASV10105	Eukaryota	Dinophyceae	Gymnodiniales	Gymnodiniaceae	Gyrodinium	Unassigned Gyrodinium (Genus)	ASV10030	Eukaryota	Dinophyceae	Unassigned Dinophyceae (Class)	Unassigned Dinophyceae (Class)	Unassigned Dinophyceae (Class)	Unassigned Dinophyceae (Class)	-0.0731456	Neg	Protist-Protist
ASV10105	Eukaryota	Dinophyceae	Gymnodiniales	Gymnodiniaceae	Gyrodinium	Unassigned Gyrodinium (Genus)	ASV3670	Eukaryota	Bicoecea	Bicoecales	Bicoecaceae	Bicosoeca	Unassigned Bicosoeca (Genus)	-0.125761	Neg	Protist-Protist
ASV10105	Eukaryota	Dinophyceae	Gymnodiniales	Gymnodiniaceae	Gyrodinium	Unassigned Gyrodinium (Genus)	ASV8128	Eukaryota	Spirotrichea	Choreotrichida	Strobilidiidae_I	Pelagostrobilidium	Pelagostrobilidium_sp.	0.0438761	Pos	Protist-Protist
ASV10105	Eukaryota	Dinophyceae	Gymnodiniales	Gymnodiniaceae	Gyrodinium	Unassigned Gyrodinium (Genus)	ASV7007	Eukaryota	Mamiellophyceae	Mamiellales	Bathycoccaceae	Ostreococcus	Ostreococcus_tauri	0.155929	Pos	Protist-Protist
ASV10105	Eukaryota	Dinophyceae	Gymnodiniales	Gymnodiniaceae	Gyrodinium	Unassigned Gyrodinium (Genus)	ASV8081	Eukaryota	Spirotrichea	Tintinnida	Unassigned Tintinnida (Order)	Unassigned Tintinnida (Order)	Unassigned Tintinnida (Order)	0.00338193	Pos	Protist-Protist
ASV10105	Eukaryota	Dinophyceae	Gymnodiniales	Gymnodiniaceae	Gyrodinium	Unassigned Gyrodinium (Genus)	ASV9400	Eukaryota	Syndiniales	Dino-Group-III	Dino-Group-III_X	Dino-Group-III_XX	Dino-Group-III_XX_sp.	-0.0704554	Neg	Protist-Protist
ASV2105	Eukaryota	Bacillariophyta	Bacillariophyta_X	Raphid-pennate	Seminavis	Seminavis_sp.	ASV842	Eukaryota	Filosa-Thecofilosea	Cryomonadida	Protaspa-lineage	Protaspa-lineage_X	Protaspa-lineage_X_sp.	0.0553376	Pos	Protist-Protist
ASV2295	Eukaryota	Bacillariophyta	Bacillariophyta_X	Raphid-pennate	Surirella	Surirella_sp.	ASV2011	Eukaryota	Bacillariophyta	Bacillariophyta_X	Raphid-pennate	Unassigned Raphid-pennate (Family)	Unassigned Raphid-pennate (Family)	0.0435716	Pos	Protist-Protist
ASV2519	Eukaryota	Bacillariophyta	Bacillariophyta_X	Polar-centric-Mediophyceae	Chaetoceros	Unassigned Chaetoceros (Genus)	ASV2491	Eukaryota	Bacillariophyta	Bacillariophyta_X	Polar-centric-Mediophyceae	Chaetoceros	Chaetoceros_sp_P._quinquecorne_endosymbiont	0.174149	Pos	Protist-Protist
ASV2545	Eukaryota	Bacillariophyta	Bacillariophyta_X	Polar-centric-Mediophyceae	Chaetoceros	Unassigned Chaetoceros (Genus)	ASV1480	Eukaryota	Filosa-Imbricatea	Filosa-Imbricatea_X	Novel-clade-2	Novel-clade-2_X	Novel-clade-2_X_sp.	0.16694	Pos	Protist-Protist
ASV2600	Eukaryota	Bacillariophyta	Bacillariophyta_X	Polar-centric-Mediophyceae	Chaetoceros	Chaetoceros_muellerii	ASV842	Eukaryota	Filosa-Thecofilosea	Cryomonadida	Protaspa-lineage	Protaspa-lineage_X	Protaspa-lineage_X_sp.	-0.0757109	Neg	Protist-Protist
ASV2600	Eukaryota	Bacillariophyta	Bacillariophyta_X	Polar-centric-Mediophyceae	Chaetoceros	Chaetoceros_muellerii	ASV2597	Eukaryota	Bacillariophyta	Bacillariophyta_X	Polar-centric-Mediophyceae	Chaetoceros	Chaetoceros_muellerii	0.393272	Pos	Protist-Protist
ASV2639	Eukaryota	Bacillariophyta	Bacillariophyta_X	Polar-centric-Mediophyceae	Ditylum	Unassigned Ditylum (Genus)	ASV2011	Eukaryota	Bacillariophyta	Bacillariophyta_X	Raphid-pennate	Unassigned Raphid-pennate (Family)	Unassigned Raphid-pennate (Family)	0.223449	Pos	Protist-Protist
ASV2639	Eukaryota	Bacillariophyta	Bacillariophyta_X	Polar-centric-Mediophyceae	Ditylum	Unassigned Ditylum (Genus)	ASV63	Eukaryota	Bacillariophyta	Bacillariophyta_X	Radial-centric-basal-Coscinodiscophyceae	Corethron	Corethron_hystrix	0.131918	Pos	Protist-Protist
ASV2659	Eukaryota	Bacillariophyta	Bacillariophyta_X	Polar-centric-Mediophyceae	Odontella	Odontella_mobiliensis	ASV2105	Eukaryota	Bacillariophyta	Bacillariophyta_X	Raphid-pennate	Seminavis	Seminavis_sp.	0.232284	Pos	Protist-Protist
ASV2700	Eukaryota	Bacillariophyta	Bacillariophyta_X	Radial-centric-basal-Coscinodiscophyceae	Actinocyclus	Actinocyclus_curvatulus	ASV2140	Eukaryota	Bacillariophyta	Bacillariophyta_X	Raphid-pennate	Unassigned Raphid-pennate (Family)	Unassigned Raphid-pennate (Family)	-0.0335992	Neg	Protist-Protist
ASV2772	Eukaryota	Bacillariophyta	Bacillariophyta_X	Polar-centric-Mediophyceae	Cyclotella	Unassigned Cyclotella (Genus)	ASV2734	Eukaryota	Bacillariophyta	Bacillariophyta_X	Radial-centric-basal-Coscinodiscophyceae	Guinardia	Guinardia_delicatula	0.0325321	Pos	Protist-Protist
ASV2778	Eukaryota	Bacillariophyta	Bacillariophyta_X	Polar-centric-Mediophyceae	Cyclotella	Cyclotella_sp.	ASV2491	Eukaryota	Bacillariophyta	Bacillariophyta_X	Polar-centric-Mediophyceae	Chaetoceros	Chaetoceros_sp_P._quinquecorne_endosymbiont	0.19132	Pos	Protist-Protist
ASV2823	Eukaryota	Bacillariophyta	Bacillariophyta_X	Polar-centric-Mediophyceae	Thalassiosira	Unassigned Thalassiosira (Genus)	ASV2600	Eukaryota	Bacillariophyta	Bacillariophyta_X	Polar-centric-Mediophyceae	Chaetoceros	Chaetoceros_muellerii	-0.144162	Neg	Protist-Protist
ASV2823	Eukaryota	Bacillariophyta	Bacillariophyta_X	Polar-centric-Mediophyceae	Thalassiosira	Unassigned Thalassiosira (Genus)	ASV2597	Eukaryota	Bacillariophyta	Bacillariophyta_X	Polar-centric-Mediophyceae	Chaetoceros	Chaetoceros_muellerii	-0.0042179	Neg	Protist-Protist
ASV2823	Eukaryota	Bacillariophyta	Bacillariophyta_X	Polar-centric-Mediophyceae	Thalassiosira	Unassigned Thalassiosira (Genus)	ASV2637	Eukaryota	Bacillariophyta	Bacillariophyta_X	Polar-centric-Mediophyceae	Unassigned Polar-centric-Mediophyceae (Family)	Unassigned Polar-centric-Mediophyceae (Family)	0.278975	Pos	Protist-Protist
ASV2826	Eukaryota	Bacillariophyta	Bacillariophyta_X	Polar-centric-Mediophyceae	Unassigned Polar-centric-Mediophyceae (Family)	Unassigned Polar-centric-Mediophyceae (Family)	ASV2823	Eukaryota	Bacillariophyta	Bacillariophyta_X	Polar-centric-Mediophyceae	Thalassiosira	Unassigned Thalassiosira (Genus)	0.0880474	Pos	Protist-Protist
ASV2846	Eukaryota	Bacillariophyta	Bacillariophyta_X	Polar-centric-Mediophyceae	Thalassiosira	Unassigned Thalassiosira (Genus)	ASV2826	Eukaryota	Bacillariophyta	Bacillariophyta_X	Polar-centric-Mediophyceae	Unassigned Polar-centric-Mediophyceae (Family)	Unassigned Polar-centric-Mediophyceae (Family)	0.035485	Pos	Protist-Protist
ASV2846	Eukaryota	Bacillariophyta	Bacillariophyta_X	Polar-centric-Mediophyceae	Thalassiosira	Unassigned Thalassiosira (Genus)	ASV2531	Eukaryota	Bacillariophyta	Bacillariophyta_X	Unassigned Bacillariophyta_X (Order)	Unassigned Bacillariophyta_X (Order)	Unassigned Bacillariophyta_X (Order)	0.115314	Pos	Protist-Protist
ASV2846	Eukaryota	Bacillariophyta	Bacillariophyta_X	Polar-centric-Mediophyceae	Thalassiosira	Unassigned Thalassiosira (Genus)	ASV2772	Eukaryota	Bacillariophyta	Bacillariophyta_X	Polar-centric-Mediophyceae	Cyclotella	Unassigned Cyclotella (Genus)	0.00854762	Pos	Protist-Protist
ASV2851	Eukaryota	Bacillariophyta	Bacillariophyta_X	Polar-centric-Mediophyceae	Thalassiosira	Thalassiosira_anguste-lineata	ASV2011	Eukaryota	Bacillariophyta	Bacillariophyta_X	Raphid-pennate	Unassigned Raphid-pennate (Family)	Unassigned Raphid-pennate (Family)	0.236694	Pos	Protist-Protist
ASV2851	Eukaryota	Bacillariophyta	Bacillariophyta_X	Polar-centric-Mediophyceae	Thalassiosira	Thalassiosira_anguste-lineata	ASV2534	Eukaryota	Bacillariophyta	Bacillariophyta_X	Polar-centric-Mediophyceae	Unassigned Polar-centric-Mediophyceae (Family)	Unassigned Polar-centric-Mediophyceae (Family)	0.0408814	Pos	Protist-Protist
ASV2851	Eukaryota	Bacillariophyta	Bacillariophyta_X	Polar-centric-Mediophyceae	Thalassiosira	Thalassiosira_anguste-lineata	ASV2545	Eukaryota	Bacillariophyta	Bacillariophyta_X	Polar-centric-Mediophyceae	Chaetoceros	Unassigned Chaetoceros (Genus)	-0.0110871	Neg	Protist-Protist
ASV2851	Eukaryota	Bacillariophyta	Bacillariophyta_X	Polar-centric-Mediophyceae	Thalassiosira	Thalassiosira_anguste-lineata	ASV2295	Eukaryota	Bacillariophyta	Bacillariophyta_X	Raphid-pennate	Surirella	Surirella_sp.	0.269721	Pos	Protist-Protist
ASV2880	Eukaryota	Bacillariophyta	Bacillariophyta_X	Polar-centric-Mediophyceae	Thalassiosira	Unassigned Thalassiosira (Genus)	ASV2734	Eukaryota	Bacillariophyta	Bacillariophyta_X	Radial-centric-basal-Coscinodiscophyceae	Guinardia	Guinardia_delicatula	-0.0797096	Neg	Protist-Protist
ASV2881	Eukaryota	Bacillariophyta	Bacillariophyta_X	Polar-centric-Mediophyceae	Thalassiosira	Unassigned Thalassiosira (Genus)	ASV2826	Eukaryota	Bacillariophyta	Bacillariophyta_X	Polar-centric-Mediophyceae	Unassigned Polar-centric-Mediophyceae (Family)	Unassigned Polar-centric-Mediophyceae (Family)	0.483918	Pos	Protist-Protist
ASV2881	Eukaryota	Bacillariophyta	Bacillariophyta_X	Polar-centric-Mediophyceae	Thalassiosira	Unassigned Thalassiosira (Genus)	ASV2846	Eukaryota	Bacillariophyta	Bacillariophyta_X	Polar-centric-Mediophyceae	Thalassiosira	Unassigned Thalassiosira (Genus)	0.019431	Pos	Protist-Protist
ASV2881	Eukaryota	Bacillariophyta	Bacillariophyta_X	Polar-centric-Mediophyceae	Thalassiosira	Unassigned Thalassiosira (Genus)	ASV2880	Eukaryota	Bacillariophyta	Bacillariophyta_X	Polar-centric-Mediophyceae	Thalassiosira	Unassigned Thalassiosira (Genus)	0.205265	Pos	Protist-Protist
ASV2881	Eukaryota	Bacillariophyta	Bacillariophyta_X	Polar-centric-Mediophyceae	Thalassiosira	Unassigned Thalassiosira (Genus)	ASV2105	Eukaryota	Bacillariophyta	Bacillariophyta_X	Raphid-pennate	Seminavis	Seminavis_sp.	0.0142112	Pos	Protist-Protist
ASV2888	Eukaryota	Bacillariophyta	Bacillariophyta_X	Polar-centric-Mediophyceae	Thalassiosira	Unassigned Thalassiosira (Genus)	ASV2583	Eukaryota	Bacillariophyta	Bacillariophyta_X	Polar-centric-Mediophyceae	Chaetoceros	Chaetoceros_decipiens	0.110408	Pos	Protist-Protist
ASV2896	Eukaryota	Bacillariophyta	Bacillariophyta_X	Polar-centric-Mediophyceae	Thalassiosira	Thalassiosira_hendeyi	ASV2491	Eukaryota	Bacillariophyta	Bacillariophyta_X	Polar-centric-Mediophyceae	Chaetoceros	Chaetoceros_sp_P._quinquecorne_endosymbiont	-0.0464837	Neg	Protist-Protist
ASV2896	Eukaryota	Bacillariophyta	Bacillariophyta_X	Polar-centric-Mediophyceae	Thalassiosira	Thalassiosira_hendeyi	ASV2519	Eukaryota	Bacillariophyta	Bacillariophyta_X	Polar-centric-Mediophyceae	Chaetoceros	Unassigned Chaetoceros (Genus)	-0.000783146	Neg	Protist-Protist
ASV2897	Eukaryota	Bacillariophyta	Bacillariophyta_X	Polar-centric-Mediophyceae	Thalassiosira	Thalassiosira_hendeyi	ASV2531	Eukaryota	Bacillariophyta	Bacillariophyta_X	Unassigned Bacillariophyta_X (Order)	Unassigned Bacillariophyta_X (Order)	Unassigned Bacillariophyta_X (Order)	0.0843085	Pos	Protist-Protist
ASV2897	Eukaryota	Bacillariophyta	Bacillariophyta_X	Polar-centric-Mediophyceae	Thalassiosira	Thalassiosira_hendeyi	ASV2562	Eukaryota	Bacillariophyta	Bacillariophyta_X	Polar-centric-Mediophyceae	Chaetoceros	Chaetoceros_elegans	0.0728808	Pos	Protist-Protist
ASV2897	Eukaryota	Bacillariophyta	Bacillariophyta_X	Polar-centric-Mediophyceae	Thalassiosira	Thalassiosira_hendeyi	ASV2896	Eukaryota	Bacillariophyta	Bacillariophyta_X	Polar-centric-Mediophyceae	Thalassiosira	Thalassiosira_hendeyi	0.40576	Pos	Protist-Protist
ASV2904	Eukaryota	Bacillariophyta	Bacillariophyta_X	Polar-centric-Mediophyceae	Skeletonema	Skeletonema_sp.	ASV2519	Eukaryota	Bacillariophyta	Bacillariophyta_X	Polar-centric-Mediophyceae	Chaetoceros	Unassigned Chaetoceros (Genus)	0.138575	Pos	Protist-Protist
ASV2915	Eukaryota	Bacillariophyta	Bacillariophyta_X	Polar-centric-Mediophyceae	Skeletonema	Unassigned Skeletonema (Genus)	ASV2851	Eukaryota	Bacillariophyta	Bacillariophyta_X	Polar-centric-Mediophyceae	Thalassiosira	Thalassiosira_anguste-lineata	0.04311	Pos	Protist-Protist
ASV2915	Eukaryota	Bacillariophyta	Bacillariophyta_X	Polar-centric-Mediophyceae	Skeletonema	Unassigned Skeletonema (Genus)	ASV2858	Eukaryota	Bacillariophyta	Bacillariophyta_X	Polar-centric-Mediophyceae	Unassigned Polar-centric-Mediophyceae (Family)	Unassigned Polar-centric-Mediophyceae (Family)	-0.313611	Neg	Protist-Protist
ASV2928	Eukaryota	Bacillariophyta	Bacillariophyta_X	Polar-centric-Mediophyceae	Skeletonema	Unassigned Skeletonema (Genus)	ASV2915	Eukaryota	Bacillariophyta	Bacillariophyta_X	Polar-centric-Mediophyceae	Skeletonema	Unassigned Skeletonema (Genus)	0.0962779	Pos	Protist-Protist
ASV2928	Eukaryota	Bacillariophyta	Bacillariophyta_X	Polar-centric-Mediophyceae	Skeletonema	Unassigned Skeletonema (Genus)	ASV2011	Eukaryota	Bacillariophyta	Bacillariophyta_X	Raphid-pennate	Unassigned Raphid-pennate (Family)	Unassigned Raphid-pennate (Family)	0.044313	Pos	Protist-Protist
ASV2928	Eukaryota	Bacillariophyta	Bacillariophyta_X	Polar-centric-Mediophyceae	Skeletonema	Unassigned Skeletonema (Genus)	ASV2851	Eukaryota	Bacillariophyta	Bacillariophyta_X	Polar-centric-Mediophyceae	Thalassiosira	Thalassiosira_anguste-lineata	0.0860253	Pos	Protist-Protist
ASV2928	Eukaryota	Bacillariophyta	Bacillariophyta_X	Polar-centric-Mediophyceae	Skeletonema	Unassigned Skeletonema (Genus)	ASV1480	Eukaryota	Filosa-Imbricatea	Filosa-Imbricatea_X	Novel-clade-2	Novel-clade-2_X	Novel-clade-2_X_sp.	-0.237132	Neg	Protist-Protist
ASV2931	Eukaryota	Bacillariophyta	Bacillariophyta_X	Polar-centric-Mediophyceae	Skeletonema	Unassigned Skeletonema (Genus)	ASV2295	Eukaryota	Bacillariophyta	Bacillariophyta_X	Raphid-pennate	Surirella	Surirella_sp.	0.187808	Pos	Protist-Protist
ASV2931	Eukaryota	Bacillariophyta	Bacillariophyta_X	Polar-centric-Mediophyceae	Skeletonema	Unassigned Skeletonema (Genus)	ASV2851	Eukaryota	Bacillariophyta	Bacillariophyta_X	Polar-centric-Mediophyceae	Thalassiosira	Thalassiosira_anguste-lineata	0.478359	Pos	Protist-Protist
ASV2931	Eukaryota	Bacillariophyta	Bacillariophyta_X	Polar-centric-Mediophyceae	Skeletonema	Unassigned Skeletonema (Genus)	ASV2915	Eukaryota	Bacillariophyta	Bacillariophyta_X	Polar-centric-Mediophyceae	Skeletonema	Unassigned Skeletonema (Genus)	0.0932473	Pos	Protist-Protist
ASV2931	Eukaryota	Bacillariophyta	Bacillariophyta_X	Polar-centric-Mediophyceae	Skeletonema	Unassigned Skeletonema (Genus)	ASV2011	Eukaryota	Bacillariophyta	Bacillariophyta_X	Raphid-pennate	Unassigned Raphid-pennate (Family)	Unassigned Raphid-pennate (Family)	0.00508308	Pos	Protist-Protist
ASV2935	Eukaryota	Bacillariophyta	Bacillariophyta_X	Polar-centric-Mediophyceae	Polar-centric-Mediophyceae_X	Polar-centric-Mediophyceae_X_sp.	ASV2823	Eukaryota	Bacillariophyta	Bacillariophyta_X	Polar-centric-Mediophyceae	Thalassiosira	Unassigned Thalassiosira (Genus)	0.0389423	Pos	Protist-Protist
ASV3544	Eukaryota	MAST-6	MAST-6_X	MAST-6_XX	MAST-6_XXX	MAST-6_XXX_sp.	ASV1480	Eukaryota	Filosa-Imbricatea	Filosa-Imbricatea_X	Novel-clade-2	Novel-clade-2_X	Novel-clade-2_X_sp.	0.278436	Pos	Protist-Protist
ASV3546	Eukaryota	MAST-6	MAST-6_X	MAST-6_XX	MAST-6_XXX	MAST-6_XXX_sp.	ASV2140	Eukaryota	Bacillariophyta	Bacillariophyta_X	Raphid-pennate	Unassigned Raphid-pennate (Family)	Unassigned Raphid-pennate (Family)	-0.0168929	Neg	Protist-Protist
ASV3546	Eukaryota	MAST-6	MAST-6_X	MAST-6_XX	MAST-6_XXX	MAST-6_XXX_sp.	ASV2904	Eukaryota	Bacillariophyta	Bacillariophyta_X	Polar-centric-Mediophyceae	Skeletonema	Skeletonema_sp.	-0.00597765	Neg	Protist-Protist
ASV3546	Eukaryota	MAST-6	MAST-6_X	MAST-6_XX	MAST-6_XXX	MAST-6_XXX_sp.	ASV2851	Eukaryota	Bacillariophyta	Bacillariophyta_X	Polar-centric-Mediophyceae	Thalassiosira	Thalassiosira_anguste-lineata	0.0425176	Pos	Protist-Protist
ASV3670	Eukaryota	Bicoecea	Bicoecales	Bicoecaceae	Bicosoeca	Unassigned Bicosoeca (Genus)	ASV842	Eukaryota	Filosa-Thecofilosea	Cryomonadida	Protaspa-lineage	Protaspa-lineage_X	Protaspa-lineage_X_sp.	-0.182183	Neg	Protist-Protist
ASV3670	Eukaryota	Bicoecea	Bicoecales	Bicoecaceae	Bicosoeca	Unassigned Bicosoeca (Genus)	ASV2723	Eukaryota	Bacillariophyta	Bacillariophyta_X	Radial-centric-basal-Coscinodiscophyceae	Coscinodiscus	Coscinodiscus_jonesianus	-0.00722963	Neg	Protist-Protist
ASV4087	Eukaryota	Picozoa_X	Picozoa_XX	Picozoa_XXX	Picozoa_XXXX	Picozoa_XXXX_sp.	ASV3670	Eukaryota	Bicoecea	Bicoecales	Bicoecaceae	Bicosoeca	Unassigned Bicosoeca (Genus)	0.0547712	Pos	Protist-Protist
ASV4093	Eukaryota	Picozoa_X	Picozoa_XX	Picozoa_XXX	Picozoa_XXXX	Picozoa_XXXX_sp.	ASV3544	Eukaryota	MAST-6	MAST-6_X	MAST-6_XX	MAST-6_XXX	MAST-6_XXX_sp.	0.108523	Pos	Protist-Protist
ASV4093	Eukaryota	Picozoa_X	Picozoa_XX	Picozoa_XXX	Picozoa_XXXX	Picozoa_XXXX_sp.	ASV2597	Eukaryota	Bacillariophyta	Bacillariophyta_X	Polar-centric-Mediophyceae	Chaetoceros	Chaetoceros_muellerii	-0.242489	Neg	Protist-Protist
ASV4527	Eukaryota	Bacillariophyta	Bacillariophyta_X	Araphid-pennate	Talaroneis	Talaroneis_posidoniae	ASV2140	Eukaryota	Bacillariophyta	Bacillariophyta_X	Raphid-pennate	Unassigned Raphid-pennate (Family)	Unassigned Raphid-pennate (Family)	-0.151901	Neg	Protist-Protist
ASV4527	Eukaryota	Bacillariophyta	Bacillariophyta_X	Araphid-pennate	Talaroneis	Talaroneis_posidoniae	ASV842	Eukaryota	Filosa-Thecofilosea	Cryomonadida	Protaspa-lineage	Protaspa-lineage_X	Protaspa-lineage_X_sp.	-0.0941604	Neg	Protist-Protist
ASV4527	Eukaryota	Bacillariophyta	Bacillariophyta_X	Araphid-pennate	Talaroneis	Talaroneis_posidoniae	ASV2823	Eukaryota	Bacillariophyta	Bacillariophyta_X	Polar-centric-Mediophyceae	Thalassiosira	Unassigned Thalassiosira (Genus)	-0.0140221	Neg	Protist-Protist
ASV4527	Eukaryota	Bacillariophyta	Bacillariophyta_X	Araphid-pennate	Talaroneis	Talaroneis_posidoniae	ASV3544	Eukaryota	MAST-6	MAST-6_X	MAST-6_XX	MAST-6_XXX	MAST-6_XXX_sp.	-0.107774	Neg	Protist-Protist
ASV4667	Eukaryota	Acantharea	Acantharea_X	Acantharea_XX	Acantharea_XXX	Acantharea_XXX_sp.	ASV2545	Eukaryota	Bacillariophyta	Bacillariophyta_X	Polar-centric-Mediophyceae	Chaetoceros	Unassigned Chaetoceros (Genus)	-0.0077784	Neg	Protist-Protist
ASV6398	Eukaryota	Katablepharidaceae	Katablepharidales	Katablepharidales_X	Leucocryptos	Leucocryptos_marina	ASV2639	Eukaryota	Bacillariophyta	Bacillariophyta_X	Polar-centric-Mediophyceae	Ditylum	Unassigned Ditylum (Genus)	-0.00258568	Neg	Protist-Protist
ASV6398	Eukaryota	Katablepharidaceae	Katablepharidales	Katablepharidales_X	Leucocryptos	Leucocryptos_marina	ASV2597	Eukaryota	Bacillariophyta	Bacillariophyta_X	Polar-centric-Mediophyceae	Chaetoceros	Chaetoceros_muellerii	0.173766	Pos	Protist-Protist
ASV6398	Eukaryota	Katablepharidaceae	Katablepharidales	Katablepharidales_X	Leucocryptos	Leucocryptos_marina	ASV2600	Eukaryota	Bacillariophyta	Bacillariophyta_X	Polar-centric-Mediophyceae	Chaetoceros	Chaetoceros_muellerii	0.0054357	Pos	Protist-Protist
ASV6405	Eukaryota	Katablepharidaceae	Katablepharidales	Katablepharidales_X	Katablepharis	Katablepharis_japonica	ASV63	Eukaryota	Bacillariophyta	Bacillariophyta_X	Radial-centric-basal-Coscinodiscophyceae	Corethron	Corethron_hystrix	-0.0795943	Neg	Protist-Protist
ASV6405	Eukaryota	Katablepharidaceae	Katablepharidales	Katablepharidales_X	Katablepharis	Katablepharis_japonica	ASV2562	Eukaryota	Bacillariophyta	Bacillariophyta_X	Polar-centric-Mediophyceae	Chaetoceros	Chaetoceros_elegans	-0.0400478	Neg	Protist-Protist
ASV6438	Eukaryota	Cryptophyceae	Cryptomonadales	Cryptomonadales_X	Unassigned Cryptomonadales_X (Family)	Unassigned Cryptomonadales_X (Family)	ASV2700	Eukaryota	Bacillariophyta	Bacillariophyta_X	Radial-centric-basal-Coscinodiscophyceae	Actinocyclus	Actinocyclus_curvatulus	0.00634021	Pos	Protist-Protist
ASV6438	Eukaryota	Cryptophyceae	Cryptomonadales	Cryptomonadales_X	Unassigned Cryptomonadales_X (Family)	Unassigned Cryptomonadales_X (Family)	ASV2932	Eukaryota	Bacillariophyta	Bacillariophyta_X	Polar-centric-Mediophyceae	Skeletonema	Unassigned Skeletonema (Genus)	0.0405169	Pos	Protist-Protist
ASV6438	Eukaryota	Cryptophyceae	Cryptomonadales	Cryptomonadales_X	Unassigned Cryptomonadales_X (Family)	Unassigned Cryptomonadales_X (Family)	ASV4087	Eukaryota	Picozoa_X	Picozoa_XX	Picozoa_XXX	Picozoa_XXXX	Picozoa_XXXX_sp.	0.014791	Pos	Protist-Protist
ASV6452	Eukaryota	Cryptophyceae	Cryptomonadales	Cryptomonadales_X	Cryptomonadales_XX	Cryptomonadales_XX_sp.	ASV2915	Eukaryota	Bacillariophyta	Bacillariophyta_X	Polar-centric-Mediophyceae	Skeletonema	Unassigned Skeletonema (Genus)	-0.0367601	Neg	Protist-Protist
ASV6453	Eukaryota	Cryptophyceae	Cryptomonadales	Cryptomonadales_X	Plagioselmis	Plagioselmis_prolonga	ASV2915	Eukaryota	Bacillariophyta	Bacillariophyta_X	Polar-centric-Mediophyceae	Skeletonema	Unassigned Skeletonema (Genus)	-0.085774	Neg	Protist-Protist
ASV6453	Eukaryota	Cryptophyceae	Cryptomonadales	Cryptomonadales_X	Plagioselmis	Plagioselmis_prolonga	ASV6452	Eukaryota	Cryptophyceae	Cryptomonadales	Cryptomonadales_X	Cryptomonadales_XX	Cryptomonadales_XX_sp.	0.433299	Pos	Protist-Protist
ASV6453	Eukaryota	Cryptophyceae	Cryptomonadales	Cryptomonadales_X	Plagioselmis	Plagioselmis_prolonga	ASV2105	Eukaryota	Bacillariophyta	Bacillariophyta_X	Raphid-pennate	Seminavis	Seminavis_sp.	-0.057655	Neg	Protist-Protist
ASV6486	Eukaryota	Cryptophyceae	Cryptomonadales	Cryptomonadales_X	Falcomonas	Falcomonas_daucoides	ASV3546	Eukaryota	MAST-6	MAST-6_X	MAST-6_XX	MAST-6_XXX	MAST-6_XXX_sp.	-0.187782	Neg	Protist-Protist
ASV6486	Eukaryota	Cryptophyceae	Cryptomonadales	Cryptomonadales_X	Falcomonas	Falcomonas_daucoides	ASV2140	Eukaryota	Bacillariophyta	Bacillariophyta_X	Raphid-pennate	Unassigned Raphid-pennate (Family)	Unassigned Raphid-pennate (Family)	0.0101249	Pos	Protist-Protist
ASV6486	Eukaryota	Cryptophyceae	Cryptomonadales	Cryptomonadales_X	Falcomonas	Falcomonas_daucoides	ASV2904	Eukaryota	Bacillariophyta	Bacillariophyta_X	Polar-centric-Mediophyceae	Skeletonema	Skeletonema_sp.	0.0749496	Pos	Protist-Protist
ASV6488	Eukaryota	Cryptophyceae	Cryptomonadales	Cryptomonadales_X	Hemiselmis	Unassigned Hemiselmis (Genus)	ASV2531	Eukaryota	Bacillariophyta	Bacillariophyta_X	Unassigned Bacillariophyta_X (Order)	Unassigned Bacillariophyta_X (Order)	Unassigned Bacillariophyta_X (Order)	0.0675699	Pos	Protist-Protist
ASV6491	Eukaryota	Cryptophyceae	Cryptomonadales	Cryptomonadales_X	Hemiselmis	Hemiselmis_cryptochromatica	ASV2904	Eukaryota	Bacillariophyta	Bacillariophyta_X	Polar-centric-Mediophyceae	Skeletonema	Skeletonema_sp.	0.107987	Pos	Protist-Protist
[truncated: 312 more rows]
